# Supplementary material
Source: publisher figshare collection journal article supplement (https://springernature.figshare.com/articles/dataset/_/24551521)
Supplement: Supplementary file 1 [file 1]

## Sheet: Raw Si Mg
CITATIONS	TECTONIC SETTING	LOCATION	LOCATION COMMENT	LATITUDE MIN	LATITUDE MAX	LONGITUDE MIN	LONGITUDE MAX	LAND OR SEA	ELEVATION MIN	ELEVATION MAX	SAMPLE NAME	ROCK NAME	MIN. AGE (YRS.)	MAX. AGE (YRS.)	GEOL.	AGE	ERUPTION DAY	ERUPTION MONTH	ERUPTION YEAR	ROCK TEXTURE	ROCK TYPE	DRILL DEPTH MIN	DRILL DEPTHAX	ALTERATION	MINERAL	MATERIAL	SIO2(WT%)	TIO2(WT%)	B2O3(WT%)	AL2O3(WT%)	CR2O3(WT%)	FE2O3(WT%)	FEO(WT%)	FEOT(WT%)	CAO(WT%)	MGO(WT%)	MNO(WT%)	NIO(WT%)	K2O(WT%)	NA2O(WT%)	P2O5(WT%)	H2O(WT%)	H2OP(WT%)	H2OM(WT%)	H2OT(WT%)	CO2(WT%)	CO1(WT%)	F(WT%)	CL(WT%)
[4742]	CONVERGENT MARGIN	HONSHU ARC / SOUTHWESTERN HONSHU ARC / MISHIMA ISLAND		33	35	130	133	SAE			s_1 [4742]	BASALT, PICRITIC [4742]									VOL					WR [4742]	46.67	1.96		13.14		2.35	7.37		8.87	14.21	0.12		0.99	2.84	0.31		0.69	0.43
[4742]	CONVERGENT MARGIN	HONSHU ARC / SOUTHWESTERN HONSHU ARC / TSUKUE ISLAND		33	35	130	133	SAE			s_2 [4742]	PERIDOTITE, XENOLITH [4742]									PER					WR [4742]	46.05	2.22		16.13		5.02	5.85		9.68	8.03	0.19		0.97	3.38	0.55		1.43	0.68
[4745]	CONVERGENT MARGIN	HONSHU ARC / SOUTHWESTERN HONSHU ARC / HONSHU	ABU DISTRICT, HORIKOSHI	34	35	130	132	SAE			s_1 [4745]	TRACHYBASALT [4745]									VOL					WR [4745]	52.02	1.67		16.31		2.01	6.24		8.17	6.74	0.14		1.44	4.27	0.67		0.69	0.23
[4745]	CONVERGENT MARGIN	HONSHU ARC / SOUTHWESTERN HONSHU ARC / HONSHU	ABU DISTRICT, KUNIGATOGE	34	35	130	132	SAE			s_2 [4745]	TRACHYBASALT [4745]									VOL					WR [4745]	50.82	1.29		17.57		1.34	6.94		9.22	4.97	0.09		1.67	3.93	0.75		0.86	0.34
[19928]	CONVERGENT MARGIN	HONSHU ARC / SOUTHWESTERN HONSHU ARC / HONSHU / AKIYOSHI ACCRETIONARY COMPLEX	MACHIMAN LAKE (YAMAGUCHI PREFECTURE)	34.2788	34.2788	131.348	131.348	SAE			s_AK-114-08 [19928]	BASALT [19928]								APHYRIC [19928]	VOL					WR [19928]	47.8	1.94		13.95		12.9			6.43	5.36	0.08		0.62	4.31	0.21
[19928]	CONVERGENT MARGIN	HONSHU ARC / SOUTHWESTERN HONSHU ARC / HONSHU / AKIYOSHI ACCRETIONARY COMPLEX	EDO VILLAGE (YAMAGUCHI PREFECTURE)	34.2662	34.2662	131.358	131.358	SAE			s_AK-121-08 [19928]	BASALT [19928]								APHYRIC [19928]	VOL					WR [19928]	51.7	2.23		15.88		10.2			5.81	4.81	0.12		1.02	4.58	0.54
[19928]	CONVERGENT MARGIN	HONSHU ARC / SOUTHWESTERN HONSHU ARC / HONSHU / AKIYOSHI ACCRETIONARY COMPLEX	EDO VILLAGE (YAMAGUCHI PREFECTURE)	34.2671	34.2671	131.358	131.358	SAE			s_AK-122-08 [19928]	BASALT [19928]								APHYRIC [19928]	VOL					WR [19928]	46.3	2.12		17.8		16.3			2.64	3.86	0.15		2.91	4.53	0.59
[19928]	CONVERGENT MARGIN	HONSHU ARC / SOUTHWESTERN HONSHU ARC / HONSHU / MINO-TAMBA ACCRETIONARY COMPLEX	YASHIRO BAY (FUKUI PREFECTURE, SEKUMI COMPLEX)	35.5297	35.5297	135.806	135.806	SAE			s_TM-65-07 [19928]	DOLERITE [19928]									VOL					WR [19928]	45.4	3.39		16.4		16.6			3.41	3.4	0.15		1.58	4.61	0.63
[19928]	CONVERGENT MARGIN	HONSHU ARC / SOUTHWESTERN HONSHU ARC / HONSHU / MINO-TAMBA ACCRETIONARY COMPLEX	YASHIRO BAY (FUKUI PREFECTURE, SEKUMI COMPLEX)	35.5297	35.5297	135.806	135.806	SAE			s_TM-67-07 [19928]	DOLERITE [19928]									VOL					WR [19928]	47.5	3.33		16.85		14.6			4.48	2.63	0.19		1.9	4.67	0.62
[19928]	CONVERGENT MARGIN	HONSHU ARC / SOUTHWESTERN HONSHU ARC / HONSHU / MINO-TAMBA ACCRETIONARY COMPLEX	HIRUGA BAY (FUKUI PREFECTURE, SEKUMI COMPLEX)	35.6175	35.6175	135.896	135.896	SAE			s_TM-69-07 [19928]	BASALT [19928]								PORPHYRIC [19928]	VOL					WR [19928]	48.8	1.89		16.15		11			7.48	7.84	0.15		0.88	3.19	0.18
[19928]	CONVERGENT MARGIN	HONSHU ARC / SOUTHWESTERN HONSHU ARC / HONSHU / MINO-TAMBA ACCRETIONARY COMPLEX	HIRUGA BAY (FUKUI PREFECTURE, SEKUMI COMPLEX)	35.6172	35.6172	135.896	135.896	SAE			s_TM-71-07 [19928]	BASALT [19928]								PORPHYRIC [19928]	VOL					WR [19928]	47.8	2.14		14.7		14.7			4.57	3.1	0.12		4.61	1.66	0.36
[19928]	CONVERGENT MARGIN	HONSHU ARC / SOUTHWESTERN HONSHU ARC / HONSHU / MINO-TAMBA ACCRETIONARY COMPLEX	NEO RIVER, , GIFU PREFECTURE	35.6942	35.6942	136.657	136.657	SAE			s_M-86-07 [19928]	DIABASE [19928]									PLU					WR [19928]	46.9	2.29		14.55		13.7			6.09	8.2	0.12		0.2	2.52	0.3
[19928]	CONVERGENT MARGIN	HONSHU ARC / SOUTHWESTERN HONSHU ARC / HONSHU / MINO-TAMBA ACCRETIONARY COMPLEX	NEO RIVER, , GIFU PREFECTURE	35.6942	35.6942	136.658	136.658	SAE			s_M-91-07 [19928]	DOLERITE [19928]									VOL					WR [19928]	44.8	1.86		12.45		14			9.47	7.24	0.12		1.02	2.22	0.21
[19928]	CONVERGENT MARGIN	HONSHU ARC / SOUTHWESTERN HONSHU ARC / SHIKOKU/SIKOKU / CHICHIBU ACCRETIONARY COMPLEX	KUMAGAWA RIVER, , SAMBOSAN BELT (KUMAMOTO PREFECTURE, YATUSHIRO DISTRICT, KAGUCHI AREA)	32.2928	32.2928	136.601	136.601	SAE			s_SM-125-08 [19928]	BASALT [19928]								PORPHYRIC [19928]	VOL					WR [19928]	38.6	1.78		12.1		11.1			13.6	7.39	0.13		1.32	2.9	0.25
[19928]	CONVERGENT MARGIN	HONSHU ARC / SOUTHWESTERN HONSHU ARC / SHIKOKU/SIKOKU / CHICHIBU ACCRETIONARY COMPLEX	KUMAGAWA RIVER, , SAMBOSAN BELT (KUMAMOTO PREFECTURE, YATUSHIRO DISTRICT, KAGUCHI AREA)	32.2928	32.2928	130.601	130.601	SAE			s_Sm-126-08 [19928]	BASALT [19928]								PORPHYRIC [19928]	VOL					WR [19928]	41.7	2.01		14.35		11.7			9.79	10.25	0.17		1.57	2.47	0.31
[19928]	CONVERGENT MARGIN	HONSHU ARC / SOUTHWESTERN HONSHU ARC / SHIKOKU/SIKOKU / CHICHIBU ACCRETIONARY COMPLEX	KUMAGAWA RIVER, , SAMBOSAN BELT (KUMAMOTO PREFECTURE, YATUSHIRO DISTRICT, KAGUCHI AREA)	32.2928	32.2928	130.601	130.601	SAE			s_Sm-129-08 [19928]	BASALT [19928]								PORPHYRIC [19928]	VOL					WR [19928]	42.4	2.62		14.25		12.1			9.86	5.99	0.12		3.34	2.48	0.33
[19928]	CONVERGENT MARGIN	HONSHU ARC / SOUTHWESTERN HONSHU ARC / SHIKOKU/SIKOKU / SHIMANTO ACCRETIONARY COMPLEX	SUMIYOSHI BEACH (KOCHI PREFECTURE, NORTHWESTERN MUROTO PENINSULA)	33.5198	33.5198	133.761	133.761	SAE			s_SH-02-10 [19928]	DOLERITE [19928]									VOL					WR [19928]	43.6	1.86		17.25		8.9			7.53	9.76	0.25		1.13	3.07	0.33
[19928]	CONVERGENT MARGIN	HONSHU ARC / SOUTHWESTERN HONSHU ARC / SHIKOKU/SIKOKU / SHIMANTO ACCRETIONARY COMPLEX	SUMIYOSHI BEACH (KOCHI PREFECTURE, NORTHWESTERN MUROTO PENINSULA)	33.5198	33.5198	133.761	133.761	SAE			s_SH-03-10 [19928]	DIABASE [19928]									PLU					WR [19928]	43.8	2.23		17		9.3			7.92	9.4	0.24		0.57	3.3	0.37
[19928]	CONVERGENT MARGIN	HONSHU ARC / SOUTHWESTERN HONSHU ARC / SHIKOKU/SIKOKU / SHIMANTO ACCRETIONARY COMPLEX	HIOKI BEACH (KOCHI PREFECTURE, SOUTHEASTERN MUROTO PENINSULA)	33.3142	33.3142	134.194	134.194	SAE			s_SH-05-10 [19928]	ANDESITE, BASALTIC [19928]								PORPHYRIC [19928]	VOL					WR [19928]	54.4	0.78		15.1		10.6			3.04	3.35	0.12		0.18	5.98	0.3
[19928]	CONVERGENT MARGIN	HONSHU ARC / SOUTHWESTERN HONSHU ARC / SHIKOKU/SIKOKU / SHIMANTO ACCRETIONARY COMPLEX	HIOKI BEACH (KOCHI PREFECTURE, SOUTHEASTERN MUROTO PENINSULA)	33.2536	33.2536	134.182	134.182	SAE			s_SH-07-10 [19928]	ANDESITE [19928]								PORPHYRIC [19928]	VOL					WR [19928]	57.3	0.65		18		7.3			1.84	3.41	0.08		0.2	7.93	0.25
[19928]	CONVERGENT MARGIN	HONSHU ARC / SOUTHWESTERN HONSHU ARC / SHIKOKU/SIKOKU / SHIMANTO ACCRETIONARY COMPLEX	MUROTO CAPE (KOCHI PREFECTURE, THE TIP OF THE MUROTO CAPE)	33.2449	33.2449	134.174	134.174	SAE			s_SH-10-10 [19928]	GABBRO [19928]									PLU					WR [19928]	48	1.3		14.1		10.65			12.75	6.37	0.18		0.18	3	0.09
[4656]	CONVERGENT MARGIN	HONSHU ARC / SOUTHWESTERN HONSHU ARC / HONSHU	CHUGOKU DISTRICT, TSUYAMA, SUKUMOZUKA, SHITORI-MURA, KUME-GUN	34	35.5	133	135	SAE			s_2 [4656]	LIMBURGITE [4656]									VOL					WR [4656]	43.26	1.75		13.4		3.06	8.36		11.76	11.98	0.21		1.03	3.44	0.55		1.11	0.71
[4737]	CONVERGENT MARGIN	HONSHU ARC / SOUTHWESTERN HONSHU ARC / HONSHU / HAMADA-NAGAHAMA	SHIMANE PREFECTURE	34	35	131	133	SAE			s_HM2 [4737]	NEPHELINITE [4737]				CENOZOIC [4737]				EXTREMELY FINE-GRAINED [4737]	VOL					WR [4737]	37.29	2.6		11.59				13.39	13.46	9.01	0.34		2.77	5.09	2.22
[4737]	CONVERGENT MARGIN	HONSHU ARC / SOUTHWESTERN HONSHU ARC / HONSHU / HAMADA-NAGAHAMA	SHIMANE PREFECTURE	34	35	131	133	SAE			s_HM4-2 [4737]	NEPHELINITE [4737]				CENOZOIC [4737]				EXTREMELY FINE-GRAINED [4737]	VOL					WR [4737]	36.61	2.58		11.43				13.24	14.37	8.51	0.34		2.94	5.22	2.28		0.57	0.16		0.04
[4737]	CONVERGENT MARGIN	HONSHU ARC / SOUTHWESTERN HONSHU ARC / HONSHU / HAMADA-NAGAHAMA	SHIMANE PREFECTURE	34	35	131	133	SAE			s_HM4-3 [4737]	NEPHELINITE [4737]				CENOZOIC [4737]				EXTREMELY FINE-GRAINED [4737]	VOL					WR [4737]	36.63	2.6		11.44				13.39	14.44	8.7	0.34		2.64	4.54	2.32		1.49	0.2		0.06
[4737]	CONVERGENT MARGIN	HONSHU ARC / SOUTHWESTERN HONSHU ARC / HONSHU / HAMADA-NAGAHAMA	SHIMANE PREFECTURE	34	35	131	133	SAE			s_HM7 [4737]	NEPHELINITE [4737]				CENOZOIC [4737]				EXTREMELY FINE-GRAINED [4737]	VOL					WR [4737]	37.66	2.56		11.66				13.29	13.21	9.34	0.35		2.28	4.19	2.17
[4737]	CONVERGENT MARGIN	HONSHU ARC / SOUTHWESTERN HONSHU ARC / HONSHU / HAMADA-NAGAHAMA	SHIMANE PREFECTURE	34	35	131	133	SAE			s_HM14-2 [4737]	NEPHELINITE [4737]				CENOZOIC [4737]				EXTREMELY FINE-GRAINED [4737]	VOL					WR [4737]	36.37	2.57		11.34				13.21	14.65	8.54	0.33		2.72	4.69	2.29
[4737]	CONVERGENT MARGIN	HONSHU ARC / SOUTHWESTERN HONSHU ARC / HONSHU / HAMADA-NAGAHAMA	SHIMANE PREFECTURE	34	35	131	133	SAE			s_HM21-8 [4737]	NEPHELINITE [4737]				CENOZOIC [4737]				EXTREMELY FINE-GRAINED [4737]	VOL					WR [4737]	36.98	2.59		11.33				13.37	15.14	8.61	0.34		2.18	3.8	2.25
[4737]	CONVERGENT MARGIN	HONSHU ARC / SOUTHWESTERN HONSHU ARC / HONSHU / HAMADA-NAGAHAMA	SHIMANE PREFECTURE	34	35	131	133	SAE			s_HM16-1 [4737]	NEPHELINITE [4737]				CENOZOIC [4737]				EXTREMELY FINE-GRAINED [4737]	VOL					WR [4737]	36.63	2.59		11.42				13.3	14.46	8.63	0.34		2.31	4.62	2.28		1.42	0.43		0.07
[4737]	CONVERGENT MARGIN	HONSHU ARC / SOUTHWESTERN HONSHU ARC / HONSHU / HAMADA-NAGAHAMA	SHIMANE PREFECTURE	34	35	131	133	SAE			s_HM12 [4737]	NEPHELINITE [4737]				CENOZOIC [4737]				EXTREMELY FINE-GRAINED [4737]	VOL					WR [4737]	36.95	2.6		11.53				13.43	11.92	9.64	0.38		2.88	4.99	2.22
[4737]	CONVERGENT MARGIN	HONSHU ARC / SOUTHWESTERN HONSHU ARC / HONSHU / HAMADA-NAGAHAMA	SHIMANE PREFECTURE	34	35	131	133	SAE			s_HM22-7 [4737]	NEPHELINITE [4737]				CENOZOIC [4737]				EXTREMELY FINE-GRAINED [4737]	VOL					WR [4737]	36.88	2.61		11.31				13.35	15.19	8.51	0.34		1.91	4.11	2.28
[4737]	CONVERGENT MARGIN	HONSHU ARC / SOUTHWESTERN HONSHU ARC / HONSHU / HAMADA-NAGAHAMA	SHIMANE PREFECTURE	34	35	131	133	SAE			s_HM14-1 [4737]	NEPHELINITE [4737]				CENOZOIC [4737]				EXTREMELY FINE-GRAINED [4737]	VOL					WR [4737]	36.49	2.59		11.36				13.5	13.25	9.47	0.34		2.65	4.54	2.25
[4737]	CONVERGENT MARGIN	HONSHU ARC / SOUTHWESTERN HONSHU ARC / HONSHU / HAMADA-NAGAHAMA	SHIMANE PREFECTURE	34	35	131	133	SAE			s_HM14L [4737]	NEPHELINITE [4737]				CENOZOIC [4737]				EXTREMELY FINE-GRAINED [4737]	VOL					WR [4737]	36.41	2.56		11.4				13.1	15.04	8.41	0.33		2.48	4.5	2.25
[4737]	CONVERGENT MARGIN	HONSHU ARC / SOUTHWESTERN HONSHU ARC / HONSHU / HAMADA-NAGAHAMA	SHIMANE PREFECTURE	34	35	131	133	SAE			s_HM11-1 [4737]	NEPHELINITE [4737]				CENOZOIC [4737]				EXTREMELY FINE-GRAINED [4737]	VOL					WR [4737]	36.23	2.58		11.29				13.46	14.04	8.8	0.34		2.63	4.71	2.34		1.31	0.36		0.07
[4737]	CONVERGENT MARGIN	HONSHU ARC / SOUTHWESTERN HONSHU ARC / HONSHU / HAMADA-NAGAHAMA	SHIMANE PREFECTURE	34	35	131	133	SAE			s_HM6 [4737]	NEPHELINITE [4737]				CENOZOIC [4737]				EXTREMELY FINE-GRAINED [4737]	VOL					WR [4737]	37.14	2.58		11.49				13.41	14.71	8.74	0.34		2.01	3.71	2.25
[4737]	CONVERGENT MARGIN	HONSHU ARC / SOUTHWESTERN HONSHU ARC / HONSHU / HAMADA-NAGAHAMA	SHIMANE PREFECTURE	34	35	131	133	SAE			s_HM1 [4737]	NEPHELINITE [4737]				CENOZOIC [4737]				EXTREMELY FINE-GRAINED [4737]	VOL					WR [4737]	37.35	2.6		11.61				13.14	15.23	9.03	0.34		1.56	3.3	2.15
[4737]	CONVERGENT MARGIN	HONSHU ARC / SOUTHWESTERN HONSHU ARC / HONSHU / HAMADA-NAGAHAMA	SHIMANE PREFECTURE	34	35	131	133	SAE			s_HM3 [4737]	NEPHELINITE [4737]				CENOZOIC [4737]				EXTREMELY FINE-GRAINED [4737]	VOL					WR [4737]	38.73	2.59		11.49				13.35	15.07	8.81	0.34		1.99	3.57	2.28
[4737]	CONVERGENT MARGIN	HONSHU ARC / SOUTHWESTERN HONSHU ARC / HONSHU / HAMADA-NAGAHAMA	SHIMANE PREFECTURE	34	35	131	133	SAE			s_HM14U [4737]	NEPHELINITE [4737]				CENOZOIC [4737]				EXTREMELY FINE-GRAINED [4737]	VOL					WR [4737]	36.77	2.54		11.44				13.15	15.48	8.56	0.33		1.97	3.74	2.22
[4737]	CONVERGENT MARGIN	HONSHU ARC / SOUTHWESTERN HONSHU ARC / HONSHU / HAMADA-NAGAHAMA	SHIMANE PREFECTURE	34	35	131	133	SAE			s_HM17 [4737]	NEPHELINITE [4737]				CENOZOIC [4737]				EXTREMELY FINE-GRAINED [4737]	VOL					WR [4737]	36.6	2.59		11.49				13.27	15.25	8.52	0.33		1.69	4.15	2.23
[4737]	CONVERGENT MARGIN	HONSHU ARC / SOUTHWESTERN HONSHU ARC / HONSHU / HAMADA-NAGAHAMA	SHIMANE PREFECTURE	34	35	131	133	SAE			s_HM8 [4737]	NEPHELINITE [4737]				CENOZOIC [4737]				EXTREMELY FINE-GRAINED [4737]	VOL					WR [4737]	36.91	2.6		11.39				13.58	13.11	9.71	0.35		2.19	3.99	2.25
[4737]	CONVERGENT MARGIN	HONSHU ARC / SOUTHWESTERN HONSHU ARC / HONSHU / HAMADA-NAGAHAMA	SHIMANE PREFECTURE	34	35	131	133	SAE			s_HM14M [4737]	NEPHELINITE [4737]				CENOZOIC [4737]				EXTREMELY FINE-GRAINED [4737]	VOL					WR [4737]	36.42	2.61		11.23				13.53	14.18	9.33	0.34		2.19	3.85	2.3
[4737]	CONVERGENT MARGIN	HONSHU ARC / SOUTHWESTERN HONSHU ARC / HONSHU / HAMADA-NAGAHAMA	SHIMANE PREFECTURE	34	35	131	133	SAE			s_HM21-7 [4737]	NEPHELINITE [4737]				CENOZOIC [4737]				EXTREMELY FINE-GRAINED [4737]	VOL					WR [4737]	37.13	2.6		11.09				13.5	14.91	8.63	0.34		1.81	3.69	2.23		2.24	0.46		0.04
[4737]	CONVERGENT MARGIN	HONSHU ARC / SOUTHWESTERN HONSHU ARC / HONSHU / HAMADA-NAGAHAMA	SHIMANE PREFECTURE	34	35	131	133	SAE			s_HM11-2 [4737]	NEPHELINITE [4737]				CENOZOIC [4737]				EXTREMELY FINE-GRAINED [4737]	VOL					WR [4737]	36.45	2.59		11.46				13.3	15.38	8.75	0.34		1.82	3.47	2.28		2.69	0.47		0.07
[4737]	CONVERGENT MARGIN	HONSHU ARC / SOUTHWESTERN HONSHU ARC / HONSHU / HAMADA-NAGAHAMA	SHIMANE PREFECTURE	34	35	131	133	SAE			s_HM21-5 [4737]	NEPHELINITE [4737]				CENOZOIC [4737]				EXTREMELY FINE-GRAINED [4737]	VOL					WR [4737]	36.95	2.59		11.28				13.38	15.58	8.64	0.34		1.79	2.92	2.26
[4737]	CONVERGENT MARGIN	HONSHU ARC / SOUTHWESTERN HONSHU ARC / HONSHU / HAMADA-NAGAHAMA	SHIMANE PREFECTURE	34	35	131	133	SAE			s_HM21-3 [4737]	NEPHELINITE [4737]				CENOZOIC [4737]				EXTREMELY FINE-GRAINED [4737]	VOL					WR [4737]	37.14	2.6		11.25				13.22	13.47	9.83	0.33		2.49	3.2	2.19
[4737]	CONVERGENT MARGIN	HONSHU ARC / SOUTHWESTERN HONSHU ARC / HONSHU / HAMADA-NAGAHAMA	SHIMANE PREFECTURE	34	35	131	133	SAE			s_HM4-1 [4737]	NEPHELINITE [4737]				CENOZOIC [4737]				EXTREMELY FINE-GRAINED [4737]	VOL					WR [4737]	36.58	2.58		11.45				13.3	15.1	8.49	0.34		2.14	3.36	2.3
[4737]	CONVERGENT MARGIN	HONSHU ARC / SOUTHWESTERN HONSHU ARC / HONSHU / HAMADA-NAGAHAMA	SHIMANE PREFECTURE	34	35	131	133	SAE			s_HM21-4 [4737]	NEPHELINITE [4737]				CENOZOIC [4737]				EXTREMELY FINE-GRAINED [4737]	VOL					WR [4737]	37.17	2.6		11.45				13.4	15.28	8.65	0.34		1.4	2.85	2.22
[4737]	CONVERGENT MARGIN	HONSHU ARC / SOUTHWESTERN HONSHU ARC / HONSHU / HAMADA-NAGAHAMA	SHIMANE PREFECTURE	34	35	131	133	SAE			s_HM22-3 [4737]	NEPHELINITE [4737]				CENOZOIC [4737]				EXTREMELY FINE-GRAINED [4737]	VOL					WR [4737]	37.28	2.62		11.09				13.25	14.53	9.49	0.35		1.97	2.63	2.14
[4737]	CONVERGENT MARGIN	HONSHU ARC / SOUTHWESTERN HONSHU ARC / HONSHU / HAMADA-NAGAHAMA	SHIMANE PREFECTURE	34	35	131	133	SAE			s_HM21L [4737]	NEPHELINITE [4737]				CENOZOIC [4737]				EXTREMELY FINE-GRAINED [4737]	VOL					WR [4737]	36.89	2.56		11.58				13.09	14.7	9.09	0.33		1.89	2.92	2.22		3.73	0.31		0.08
[4737]	CONVERGENT MARGIN	HONSHU ARC / SOUTHWESTERN HONSHU ARC / HONSHU / HAMADA-NAGAHAMA	SHIMANE PREFECTURE	34	35	131	133	SAE			s_HM21-2 [4737]	NEPHELINITE [4737]				CENOZOIC [4737]				EXTREMELY FINE-GRAINED [4737]	VOL					WR [4737]	37.21	2.61		11.48				13.23	15.73	8.67	0.33		1.16	2.57	2.2
[4737]	CONVERGENT MARGIN	HONSHU ARC / SOUTHWESTERN HONSHU ARC / HONSHU / HAMADA-NAGAHAMA	SHIMANE PREFECTURE	34	35	131	133	SAE			s_HM16 [4737]	NEPHELINITE [4737]				CENOZOIC [4737]				EXTREMELY FINE-GRAINED [4737]	VOL					WR [4737]	36.68	2.55		11.5				12.97	16.28	8.56	0.33		1.19	2.93	2.17
[4737]	CONVERGENT MARGIN	HONSHU ARC / SOUTHWESTERN HONSHU ARC / HONSHU / HAMADA-NAGAHAMA	SHIMANE PREFECTURE	34	35	131	133	SAE			s_HM21U [4737]	NEPHELINITE [4737]				CENOZOIC [4737]				EXTREMELY FINE-GRAINED [4737]	VOL					WR [4737]	36.86	2.57		11.59				13.06	15.89	8.74	0.33		1.01	2.88	2.19		4.07	0.34		0.06
[4737]	CONVERGENT MARGIN	HONSHU ARC / SOUTHWESTERN HONSHU ARC / HONSHU / HAMADA-NAGAHAMA	SHIMANE PREFECTURE	34	35	131	133	SAE			s_HM21-1 [4737]	NEPHELINITE [4737]				CENOZOIC [4737]				EXTREMELY FINE-GRAINED [4737]	VOL					WR [4737]	36.98	2.6		11.38				13.22	15.65	8.7	0.33		1.17	2.78	2.19
[4737]	CONVERGENT MARGIN	HONSHU ARC / SOUTHWESTERN HONSHU ARC / HONSHU / HAMADA-NAGAHAMA	SHIMANE PREFECTURE	34	35	131	133	SAE			s_HM21-6 [4737]	NEPHELINITE [4737]				CENOZOIC [4737]				EXTREMELY FINE-GRAINED [4737]	VOL					WR [4737]	36.84	2.5		11.52				12.99	16.44	8.53	0.33		0.84	2.58	2.19		3.95	0.32		0.05
[4737]	CONVERGENT MARGIN	HONSHU ARC / SOUTHWESTERN HONSHU ARC / HONSHU / HAMADA-NAGAHAMA	SHIMANE PREFECTURE	34	35	131	133	SAE			s_HM15 [4737]	NEPHELINITE [4737]				CENOZOIC [4737]				EXTREMELY FINE-GRAINED [4737]	VOL					WR [4737]	36.92	2.54		11.4				13.04	15.74	8.26	0.32		1.72	2.63	2.19
[4737]	CONVERGENT MARGIN	HONSHU ARC / SOUTHWESTERN HONSHU ARC / HONSHU / HAMADA-NAGAHAMA	SHIMANE PREFECTURE	34	35	131	133	SAE			s_HM19 [4737]	NEPHELINITE [4737]				CENOZOIC [4737]				EXTREMELY FINE-GRAINED [4737]	VOL					WR [4737]	37.39	2.6		11.73				13.19	14.01	9.26	0.33		1.32	4.69	2.11		2.55	0.47		0.06
[4737]	CONVERGENT MARGIN	HONSHU ARC / SOUTHWESTERN HONSHU ARC / HONSHU / HAMADA-NAGAHAMA	SHIMANE PREFECTURE	34	35	131	133	SAE			s_HM22-4 [4737]	NEPHELINITE [4737]				CENOZOIC [4737]				EXTREMELY FINE-GRAINED [4737]	VOL					WR [4737]	37.52	2.65		11.49				13.35	13.89	9.14	0.33		0.89	4.54	2.13
[4737]	CONVERGENT MARGIN	HONSHU ARC / SOUTHWESTERN HONSHU ARC / HONSHU / HAMADA-NAGAHAMA	SHIMANE PREFECTURE	34	35	131	133	SAE			s_HM5 [4737]	NEPHELINITE [4737]				CENOZOIC [4737]				EXTREMELY FINE-GRAINED [4737]	VOL					WR [4737]	37.32	2.59		11.56				13.28	15.09	8.68	0.34		1.14	3.51	2.2
[4737]	CONVERGENT MARGIN	HONSHU ARC / SOUTHWESTERN HONSHU ARC / HONSHU / HAMADA-NAGAHAMA	SHIMANE PREFECTURE	34	35	131	133	SAE			s_HM22-1 [4737]	NEPHELINITE [4737]				CENOZOIC [4737]				EXTREMELY FINE-GRAINED [4737]	VOL					WR [4737]	37.51	2.54		11.56				12.83	14.84	8.79	0.33		1.51	3.68	2.1		2.91	0.48		0.08
[4737]	CONVERGENT MARGIN	HONSHU ARC / SOUTHWESTERN HONSHU ARC / HONSHU / HAMADA-NAGAHAMA	SHIMANE PREFECTURE	34	35	131	133	SAE			s_HM22-2 [4737]	NEPHELINITE [4737]				CENOZOIC [4737]				EXTREMELY FINE-GRAINED [4737]	VOL					WR [4737]	37.62	2.57		11.5				12.96	14.8	8.68	0.33		1.25	3.72	2.09
[4737]	CONVERGENT MARGIN	HONSHU ARC / SOUTHWESTERN HONSHU ARC / HONSHU / HAMADA-NAGAHAMA	SHIMANE PREFECTURE	34	35	131	133	SAE			s_HM22-6 [4737]	NEPHELINITE [4737]				CENOZOIC [4737]				EXTREMELY FINE-GRAINED [4737]	VOL					WR [4737]	37.37	2.58		11.51				13.08	14.74	9.25	0.32		0.6	3.49	2.11
[4737]	CONVERGENT MARGIN	HONSHU ARC / SOUTHWESTERN HONSHU ARC / HONSHU / HAMADA-NAGAHAMA	SHIMANE PREFECTURE	34	35	131	133	SAE			s_HM22-5 [4737]	NEPHELINITE [4737]				CENOZOIC [4737]				EXTREMELY FINE-GRAINED [4737]	VOL					WR [4737]	37.96	2.62		11.82				13.07	13.87	8.96	0.32		0.23	4.15	2.04
[4737]	CONVERGENT MARGIN	HONSHU ARC / SOUTHWESTERN HONSHU ARC / HONSHU / HAMADA-NAGAHAMA	SHIMANE PREFECTURE	34	35	131	133	SAE			s_HM18-2 [4737]	NEPHELINITE [4737]				CENOZOIC [4737]				EXTREMELY FINE-GRAINED [4737]	VOL					WR [4737]	37.45	2.55		11.6				12.75	14.91	9.33	0.32		0.62	2.87	2.04		4.82	0.33		0.07
[4737]	CONVERGENT MARGIN	HONSHU ARC / SOUTHWESTERN HONSHU ARC / HONSHU / HAMADA-NAGAHAMA	SHIMANE PREFECTURE	34	35	131	133	SAE			s_HM13-2 [4737]	NEPHELINITE [4737]				CENOZOIC [4737]				EXTREMELY FINE-GRAINED [4737]	VOL					WR [4737]	36.96	2.56		11.58				12.87	14.38	8.77	0.33		0.52	4.32	2.03
[4737]	CONVERGENT MARGIN	HONSHU ARC / SOUTHWESTERN HONSHU ARC / HONSHU / HAMADA-NAGAHAMA	SHIMANE PREFECTURE	34	35	131	133	SAE			s_HM9 [4737]	NEPHELINITE [4737]				CENOZOIC [4737]				EXTREMELY FINE-GRAINED [4737]	VOL					WR [4737]	36.94	2.57		11.39				13.09	15.11	9.38	0.34		0.78	2.11	2.14
[4737]	CONVERGENT MARGIN	HONSHU ARC / SOUTHWESTERN HONSHU ARC / HONSHU / HAMADA-NAGAHAMA	SHIMANE PREFECTURE	34	35	131	133	SAE			s_HM13-1 [4737]	NEPHELINITE [4737]				CENOZOIC [4737]				EXTREMELY FINE-GRAINED [4737]	VOL					WR [4737]	36.66	2.52		11.47				12.64	15	9.76	0.32		0.75	1.79	2.03
[4720]	CONVERGENT MARGIN	HONSHU ARC / SOUTHWESTERN HONSHU ARC / KYUSHU/TAKASHIMA ISLET	NORTHERN KYUSHU, BAY OF KARATSU, TAKASHIMA ISLET, SAGA PREFECTURE	33.2	33.6	129.5	130	SAE			s_AOYAMAINCL. [4720]	DUNITE, XENOLITH [4720]									PER					WR [4720]	40.76					1.28	7.03		0.12	50.11	0.01
[18221][18386]	CONVERGENT MARGIN	HONSHU ARC / NORTHEASTERN HONSHU ARC / HONSHU / IWATE / ONIMATA STAGE		39.88	39.88	140.98	140.98	SAE			s_VIW-19 [18221]	BASALT [18221] / NOT GIVEN [18386]									VOL					WR [18221]	49.67	0.79		17.16				9.91	10.28	8.83	0.17		0.02	1.75	0.08
[4697]	CONVERGENT MARGIN	HONSHU ARC / NORTHEASTERN HONSHU ARC / HONSHU / AKAGI	OLDER STRATOVOLCANO	36.55	36.55	139.2	139.2	SAE			s_AK1303 [4697]	ANDESITE [4697]				QUATERNARY [4697]				PORPHYRITIC [4697]	VOL			F		WR [4697]	53.4	0.82		19.8		2.93	5.51		9.87	4.04	0.15		0.45	2.57	0.12		1.18	0.04
[4697]	CONVERGENT MARGIN	HONSHU ARC / NORTHEASTERN HONSHU ARC / HONSHU / AKAGI	OLDER STRATOVOLCANO	36.55	36.55	139.2	139.2	SAE			s_AK1302 [4697]	ANDESITE [4697]				QUATERNARY [4697]				PORPHYRITIC [4697]	VOL			F		WR [4697]	58.5	0.67		18.8		3.34	3.63		7.37	2.73	0.14		1.06	3.11	0.11		1.03	0.09
[4697]	CONVERGENT MARGIN	HONSHU ARC / NORTHEASTERN HONSHU ARC / HONSHU / AKAGI	OLDER STRATOVOLCANO	36.55	36.55	139.2	139.2	SAE			s_AK2604 [4697]	ANDESITE [4697]				QUATERNARY [4697]				PORPHYRITIC [4697]	VOL			F		WR [4697]	56.3	0.66		19.1		3.38	3.88		7.87	3.1	0.14		0.66	2.73	0.13		2.1	0.24
[4697]	CONVERGENT MARGIN	HONSHU ARC / NORTHEASTERN HONSHU ARC / HONSHU / AKAGI	OLDER STRATOVOLCANO	36.55	36.55	139.2	139.2	SAE			s_AK1002 [4697]	ANDESITE [4697]				QUATERNARY [4697]				PORPHYRITIC [4697]	VOL			F		WR [4697]	57.1	0.79		19.2		2.7	4.39		7.67	2.73	0.13		0.95	3.1	0.18		1.16	0.17
[4697]	CONVERGENT MARGIN	HONSHU ARC / NORTHEASTERN HONSHU ARC / HONSHU / AKAGI	OLDER STRATOVOLCANO	36.55	36.55	139.2	139.2	SAE			s_AK1004 [4697]	ANDESITE [4697]				QUATERNARY [4697]				PORPHYRITIC [4697]	VOL			F		WR [4697]	57.9	0.65		19.9		2.56	3.52		8.24	2.12	0.12		0.81	3.24	0.19		0.56	0.16
[4697]	CONVERGENT MARGIN	HONSHU ARC / NORTHEASTERN HONSHU ARC / HONSHU / AKAGI	OLDER STRATOVOLCANO	36.55	36.55	139.2	139.2	SAE			s_AK1011 [4697]	ANDESITE [4697]				QUATERNARY [4697]				PORPHYRITIC [4697]	VOL			F		WR [4697]	58.2	0.64		19.9		2.25	3.55		7.95	1.94	0.11		0.86	3.24	0.2		0.86	0.2
[4697]	CONVERGENT MARGIN	HONSHU ARC / NORTHEASTERN HONSHU ARC / HONSHU / AKAGI	OLDER STRATOVOLCANO	36.55	36.55	139.2	139.2	SAE			s_AK1103 [4697]	ANDESITE [4697]				QUATERNARY [4697]				PORPHYRITIC [4697]	VOL			F		WR [4697]	59.5	0.51		20.7		1.95	2.29		7.82	1.36	0.09		0.91	3.34	0.16		0.96	0.17
[4697]	CONVERGENT MARGIN	HONSHU ARC / NORTHEASTERN HONSHU ARC / HONSHU / AKAGI	OLDER STRATOVOLCANO	36.55	36.55	139.2	139.2	SAE			s_AK0910 [4697]	ANDESITE [4697]				QUATERNARY [4697]				PORPHYRITIC [4697]	VOL			F		WR [4697]	53.6	0.82		19.1		3.58	5.84		8.55	4.53	0.16		0.43	2.52	0.14		0.75	0.12
[4697]	CONVERGENT MARGIN	HONSHU ARC / NORTHEASTERN HONSHU ARC / HONSHU / AKAGI	OLDER STRATOVOLCANO	36.55	36.55	139.2	139.2	SAE			s_AK1010 [4697]	ANDESITE [4697]				QUATERNARY [4697]				PORPHYRITIC [4697]	VOL			F		WR [4697]	55.7	0.77		18.5		3.95	4.76		7.12	3.85	0.15		0.66	2.82	0.17		1.45	0.41
[4697]	CONVERGENT MARGIN	HONSHU ARC / NORTHEASTERN HONSHU ARC / HONSHU / AKAGI	OLDER STRATOVOLCANO	36.55	36.55	139.2	139.2	SAE			s_AK-A [4697]	ANDESITE [4697]				QUATERNARY [4697]				PORPHYRITIC [4697]	VOL			F		WR [4697]	56	0.77		18		3.86	4.9		8.11	4.08	0.16		0.67	2.8	0.14		0.36	0.03
[4697]	CONVERGENT MARGIN	HONSHU ARC / NORTHEASTERN HONSHU ARC / HONSHU / AKAGI	OLDER STRATOVOLCANO	36.55	36.55	139.2	139.2	SAE			s_AK1012 [4697]	ANDESITE [4697]				QUATERNARY [4697]				PORPHYRITIC [4697]	VOL			F		WR [4697]	56.4	0.77		18		4.61	3.78		7.72	4.05	0.15		0.8	2.82	0.13		0.71	0.07
[4697]	CONVERGENT MARGIN	HONSHU ARC / NORTHEASTERN HONSHU ARC / HONSHU / AKAGI	OLDER STRATOVOLCANO	36.55	36.55	139.2	139.2	SAE			s_AK1201 [4697]	ANDESITE [4697]				QUATERNARY [4697]				PORPHYRITIC [4697]	VOL			F		WR [4697]	56.5	0.69		18		3.95	4.32		7.4	3.84	0.16		0.83	2.76	0.13		1.56	0.3
[4697]	CONVERGENT MARGIN	HONSHU ARC / NORTHEASTERN HONSHU ARC / HONSHU / AKAGI	OLDER STRATOVOLCANO	36.55	36.55	139.2	139.2	SAE			s_AK1102 [4697]	ANDESITE [4697]				QUATERNARY [4697]				PORPHYRITIC [4697]	VOL			F		WR [4697]	59.5	0.62		17.6		4.29	2.69		6.49	2.7	0.13		0.75	2.83	0.15		1.68	0.48
[4697]	CONVERGENT MARGIN	HONSHU ARC / NORTHEASTERN HONSHU ARC / HONSHU / AKAGI	OLDER STRATOVOLCANO	36.55	36.55	139.2	139.2	SAE			s_AK1008 [4697]	ANDESITE [4697]				QUATERNARY [4697]				PORPHYRITIC [4697]	VOL			F		WR [4697]	62.1	0.49		16.2		2.76	2.13		5.58	1.56	0.11		1.09	3.13	0.15		3.77	0.2
[4697]	CONVERGENT MARGIN	HONSHU ARC / NORTHEASTERN HONSHU ARC / HONSHU / AKAGI	YOUNGER STRATOVOLCANO	36.55	36.55	139.2	139.2	SAE			s_AK1202 [4697]	NOT GIVEN [4697]				QUATERNARY [4697]					VOL			F		WR [4697]	58	0.69		18		3.29	3.54		6.96	3.06	0.13		0.86	2.78	0.12		1.9	0.62
[4697]	CONVERGENT MARGIN	HONSHU ARC / NORTHEASTERN HONSHU ARC / HONSHU / AKAGI	YOUNGER STRATOVOLCANO	36.55	36.55	139.2	139.2	SAE			s_AK2601 [4697]	NOT GIVEN [4697]				QUATERNARY [4697]					VOL			F		WR [4697]	59.3	0.54		18		3.5	3.05		6.96	3	0.14		1.04	2.86	0.13		1.17	0.13
[4697]	CONVERGENT MARGIN	HONSHU ARC / NORTHEASTERN HONSHU ARC / HONSHU / AKAGI	YOUNGER STRATOVOLCANO	36.55	36.55	139.2	139.2	SAE			s_AK2603B [4697]	NOT GIVEN [4697]				QUATERNARY [4697]					VOL			F		WR [4697]	60.3	0.57		17.1		3.25	3.35		6.59	3.03	0.14		1.1	2.98	0.14		0.97	0.03
[4697]	CONVERGENT MARGIN	HONSHU ARC / NORTHEASTERN HONSHU ARC / HONSHU / AKAGI	YOUNGER STRATOVOLCANO	36.55	36.55	139.2	139.2	SAE			s_AK2603G [4697]	NOT GIVEN [4697]				QUATERNARY [4697]					VOL			F		WR [4697]	60.5	0.56		17.8		3.23	2.78		6.84	2.44	0.12		1.12	3.06	0.14		0.81	0.03
[4697]	CONVERGENT MARGIN	HONSHU ARC / NORTHEASTERN HONSHU ARC / HONSHU / AKAGI	YOUNGER STRATOVOLCANO	36.55	36.55	139.2	139.2	SAE			s_AK2603W [4697]	NOT GIVEN [4697]				QUATERNARY [4697]					VOL			F		WR [4697]	60.6	0.53		17.6		2.73	3.3		6.82	2.72	0.13		1.08	3.04	0.13		0.99	0.08
[4697]	CONVERGENT MARGIN	HONSHU ARC / NORTHEASTERN HONSHU ARC / HONSHU / AKAGI	YOUNGER STRATOVOLCANO	36.55	36.55	139.2	139.2	SAE			s_AK2602 [4697]	NOT GIVEN [4697]				QUATERNARY [4697]					VOL			F		WR [4697]	61.1	0.55		17.1		3.33	2.92		6.63	2.95	0.13		1.1	2.86	0.12		0.94	0.09
[4697]	CONVERGENT MARGIN	HONSHU ARC / NORTHEASTERN HONSHU ARC / HONSHU / AKAGI	CENTRAL CONE	36.55	36.55	139.2	139.2	SAE			s_AK2605 [4697]	NOT GIVEN [4697]				QUATERNARY [4697]					VOL			F		WR [4697]	62	0.55		17.5		2.61	2.73		6.42	2.36	0.11		1.17	3.2	0.12		0.83	0.18
[4697]	CONVERGENT MARGIN	HONSHU ARC / NORTHEASTERN HONSHU ARC / HONSHU / AKAGI	CENTRAL CONE	36.55	36.55	139.2	139.2	SAE			s_AK0807 [4697]	NOT GIVEN [4697]									VOL			F		WR [4697]	71.4	0.3		15.1		1.21	1.22		3.48	0.78	0.08		2.01	3.84	0.09		1.03	0.03
[15519]	CONVERGENT MARGIN	HONSHU ARC / NORTHEASTERN HONSHU ARC / HONSHU / KUMADO IGNIMBRITE	ONO CALDERA, AIZU CALDERA CLUSTER	37.16	37.33	139.5	140.25	SAE			s_KD01 [15519]	DACITE [15519]									VOL					WR [15519]	66.77	0.52		14.49				4.11	4.58	1.43	0.09		1.74	2.96	0.1
[15519]	CONVERGENT MARGIN	HONSHU ARC / NORTHEASTERN HONSHU ARC / HONSHU / KUMADO IGNIMBRITE	ONO CALDERA, AIZU CALDERA CLUSTER	37.16	37.33	139.5	140.25	SAE			s_KD03 [15519]	DACITE [15519]									VOL					WR [15519]	67.8	0.5		14.29				3.73	4.34	1.29	0.09		1.8	3.01	0.1
[15519]	CONVERGENT MARGIN	HONSHU ARC / NORTHEASTERN HONSHU ARC / HONSHU / ASHINO IGNIMBRITE	TONOHETSURI CALDERA, AIZU CALDERA CLUSTER	37.16	37.33	139.5	140.25	SAE			s_AS01 [15519]	DACITE [15519]									VOL					WR [15519]	67.59	0.44		14.71				3.41	4.37	1.04	0.08		1.62	2.99	0.09
[15519]	CONVERGENT MARGIN	HONSHU ARC / NORTHEASTERN HONSHU ARC / HONSHU / ASHINO IGNIMBRITE	TONOHETSURI CALDERA, AIZU CALDERA CLUSTER	37.16	37.33	139.5	140.25	SAE			s_AS04 [15519]	DACITE [15519]									VOL					WR [15519]	66.4	0.47		15.12				3.72	4.47	1.22	0.09		1.46	3.02	0.1
[15519]	CONVERGENT MARGIN	HONSHU ARC / NORTHEASTERN HONSHU ARC / HONSHU / NAGURASAWA IGNIMBRITE	TONOHETSURI CALDERA, AIZU CALDERA CLUSTER	37.16	37.33	139.5	140.25	SAE			s_NG01 [15519]	DACITE [15519]									VOL					WR [15519]	66.34	0.51		14.91				3.95	4.75	1.26	0.11		1.34	3.28	0.1
[15519]	CONVERGENT MARGIN	HONSHU ARC / NORTHEASTERN HONSHU ARC / HONSHU / NAGURASAWA IGNIMBRITE	TONOHETSURI CALDERA, AIZU CALDERA CLUSTER	37.16	37.33	139.5	140.25	SAE			s_NG05 [15519]	DACITE [15519]									VOL					WR [15519]	67.19	0.5		14.35				3.85	4.58	1.25	0.1		1.36	3.19	0.1
[15519]	CONVERGENT MARGIN	HONSHU ARC / NORTHEASTERN HONSHU ARC / HONSHU / NISHIGO IGNIMBRITE	NARIOKA CALDERA, AIZU CALDERA CLUSTER	37.16	37.33	139.5	140.25	SAE			s_NS101 [15519]	RHYOLITE [15519]									VOL					WR [15519]	70.7	0.34		13.87				2.55	3.31	0.75	0.08		2.01	3.29	0.07
[15519]	CONVERGENT MARGIN	HONSHU ARC / NORTHEASTERN HONSHU ARC / HONSHU / NISHIGO IGNIMBRITE	NARIOKA CALDERA, AIZU CALDERA CLUSTER	37.16	37.33	139.5	140.25	SAE			s_NS103 [15519]	RHYOLITE [15519]									VOL					WR [15519]	71.05	0.31		14.13				2.38	3.3	0.67	0.08		2.05	3.24	0.06
[15519]	CONVERGENT MARGIN	HONSHU ARC / NORTHEASTERN HONSHU ARC / HONSHU / NISHIGO IGNIMBRITE	NARIOKA CALDERA, AIZU CALDERA CLUSTER	37.16	37.33	139.5	140.25	SAE			s_NS106 [15519]	ANDESITE [15519]									VOL					WR [15519]	58.97	0.75		16.37				6.82	6.46	2.47	0.17		1.53	3.12	0.14
[15519]	CONVERGENT MARGIN	HONSHU ARC / NORTHEASTERN HONSHU ARC / HONSHU / NISHIGO IGNIMBRITE	NARIOKA CALDERA, AIZU CALDERA CLUSTER	37.16	37.33	139.5	140.25	SAE			s_NS109 [15519]	ANDESITE [15519]									VOL					WR [15519]	59.41	0.53		15.47				6.39	6.75	3.48	0.15		1.26	2.62	0.09
[15519]	CONVERGENT MARGIN	HONSHU ARC / NORTHEASTERN HONSHU ARC / HONSHU / TEN-EI IGNIMBRITE	AIZU CALDERA CLUSTER	37.16	37.33	139.5	140.25	SAE			s_TN01 [15519]	DACITE [15519]									VOL					WR [15519]	67.61	0.45		15.07				2.93	4.33	0.87	0.07		1.74	3.05	0.07
[15519]	CONVERGENT MARGIN	HONSHU ARC / NORTHEASTERN HONSHU ARC / HONSHU / TEN-EI IGNIMBRITE	AIZU CALDERA CLUSTER	37.16	37.33	139.5	140.25	SAE			s_TN06 [15519]	DACITE [15519]									VOL					WR [15519]	68.59	0.45		15.46				3.19	4.86	1	0.08		1.63	3.42	0.08
[15519]	CONVERGENT MARGIN	HONSHU ARC / NORTHEASTERN HONSHU ARC / HONSHU / KONUMAZAKI LAVAS	ONO CALDERA, AIZU CALDERA CLUSTER	37.16	37.33	139.5	140.25	SAE			s_ONO02 [15519]	RHYOLITE [15519]									VOL					WR [15519]	71.91	0.42		13.4				2.92	3.19	0.82	0.08		2.08	3.55	0.09
[15519]	CONVERGENT MARGIN	HONSHU ARC / NORTHEASTERN HONSHU ARC / HONSHU / KONUMAZAKI LAVAS	ONO CALDERA, AIZU CALDERA CLUSTER	37.16	37.33	139.5	140.25	SAE			s_ONO03 [15519]	RHYOLITE [15519]									VOL					WR [15519]	68.95	0.45		13.22				2.85	3.64	0.82	0.08		1.95	3.54	0.1
[15519]	CONVERGENT MARGIN	HONSHU ARC / NORTHEASTERN HONSHU ARC / HONSHU / OSHIRAMORI LAVAS	POST-CALDERA DOMES WITHIN TONOHETSURI CALDERA, AIZU CALDERA CLUSTER	37.16	37.33	139.5	140.25	SAE			s_TNH01 [15519]	RHYOLITE [15519]									VOL					WR [15519]	70.36	0.5		13.82				3.27	3.62	0.94	0.1		1.37	3.54	0.11
[15519]	CONVERGENT MARGIN	HONSHU ARC / NORTHEASTERN HONSHU ARC / HONSHU / OSHIRAMORI LAVAS	POST-CALDERA DOMES WITHIN TONOHETSURI CALDERA, AIZU CALDERA CLUSTER	37.16	37.33	139.5	140.25	SAE			s_TNH10 [15519]	RHYOLITE [15519]									VOL					WR [15519]	70.04	0.52		13.74				3.36	4.11	1.04	0.12		1.54	3.7	0.13
[15519]	CONVERGENT MARGIN	HONSHU ARC / NORTHEASTERN HONSHU ARC / HONSHU / OSHIRAMORI LAVAS	POST-CALDERA DOMES WITHIN TONOHETSURI CALDERA, AIZU CALDERA CLUSTER	37.16	37.33	139.5	140.25	SAE			s_TNH02 [15519]	DACITE [15519]									VOL					WR [15519]	64.22	0.62		15.13				5.8	5.98	2.46	0.13		0.83	3.15	0.1
[15519]	CONVERGENT MARGIN	HONSHU ARC / NORTHEASTERN HONSHU ARC / HONSHU / AIZU-NUNOBIKIYAMA VOLCANIC ROCKS	4 KM NORTHEAST OF TONOHETSURI CALDERA, AIZU CALDERA CLUSTER	37.16	37.33	139.5	140.25	SAE			s_AZN01 [15519]	DACITE [15519]									VOL					WR [15519]	63.97	0.49		15.18				5.13	5.97	2.69	0.11		1.66	3.14	0.1
[15519]	CONVERGENT MARGIN	HONSHU ARC / NORTHEASTERN HONSHU ARC / HONSHU / AIZU-NUNOBIKIYAMA VOLCANIC ROCKS	4 KM NORTHEAST OF TONOHETSURI CALDERA, AIZU CALDERA CLUSTER	37.16	37.33	139.5	140.25	SAE			s_AZN04 [15519]	DACITE [15519]									VOL					WR [15519]	63.44	0.55		15.17				5.32	6.04	2.7	0.12		1.96	3.18	0.12
[15519]	CONVERGENT MARGIN	HONSHU ARC / NORTHEASTERN HONSHU ARC / HONSHU / KASSHI VOLCANIC ROCKS	SOUTH SIDE OF TONOHETSURI CALDERA, AIZU CALDERA CLUSTER	37.16	37.33	139.5	140.25	SAE			s_KSV01 [15519]	ANDESITE [15519]									VOL					WR [15519]	59.19	0.77		16.19				7.58	7.11	2.38	0.13		0.52	2.83	0.1
[15519]	CONVERGENT MARGIN	HONSHU ARC / NORTHEASTERN HONSHU ARC / HONSHU / KASSHI VOLCANIC ROCKS	SOUTH SIDE OF TONOHETSURI CALDERA, AIZU CALDERA CLUSTER	37.16	37.33	139.5	140.25	SAE			s_KSV02 [15519]	ANDESITE [15519]									VOL					WR [15519]	56.93	0.73		16.09				7.83	7.76	3.6	0.16		0.47	2.51	0.09
[17263]	CONVERGENT MARGIN	HONSHU ARC / SOUTHWESTERN HONSHU ARC / KYUSHU/OJIKA JIMA		33.2122	33.2122	129.058	129.058	SAE			s_NAG9647 [17263]	BASALT [17263]									VOL					WR [17263]	50.59	2.08		16.37				12.64	7.88	4.95	0.26		1.47	3.3	0.46
[17263]	CONVERGENT MARGIN	HONSHU ARC / SOUTHWESTERN HONSHU ARC / KYUSHU/OJIKA JIMA		33.2159	33.2159	129.048	129.048	SAE			s_NAG9636 [17263]	BASALT [17263]									VOL					WR [17263]	49.67	1.46		17.4				10.57	9.21	7.63	0.19		1.07	2.47	0.33
[17263]	CONVERGENT MARGIN	HONSHU ARC / SOUTHWESTERN HONSHU ARC / KYUSHU/OJIKA JIMA		33.186	33.186	129.058	129.058	SAE			s_NAG9642 [17263]	BASALT [17263]									VOL					WR [17263]	49.78	1.74		17.27				11.57	8.43	5.89	0.18		1.28	3.39	0.46
[17263]	CONVERGENT MARGIN	HONSHU ARC / SOUTHWESTERN HONSHU ARC / KYUSHU/OJIKA JIMA		33.1905	33.1905	129.063	129.063	SAE			s_NAG9643 [17263]	BASALT [17263]									VOL					WR [17263]	51.84	1.96		16.84				12.29	7.05	3.89	0.23		1.81	3.77	0.32
[17263]	CONVERGENT MARGIN	HONSHU ARC / SOUTHWESTERN HONSHU ARC / KYUSHU/OJIKA JIMA		33.2025	33.2025	129.064	129.064	SAE			s_NAG9646 [17263]	BASALT [17263]									VOL					WR [17263]	49.36	1.64		16.3				11.97	9.09	7.85	0.2		0.78	2.47	0.34
[17263]	CONVERGENT MARGIN	HONSHU ARC / SOUTHWESTERN HONSHU ARC / KYUSHU/OJIKA JIMA		33.2017	33.2017	129.065	129.065	SAE			s_NAG9649 [17263]	BASALT [17263]									VOL					WR [17263]	49.7	1.69		16.8				11.35	8.64	7.01	0.18		1.24	3.03	0.37
[17263]	CONVERGENT MARGIN	HONSHU ARC / SOUTHWESTERN HONSHU ARC / KYUSHU/OJIKA JIMA		33.1768	33.1768	129.059	129.059	SAE			s_NAG9639 [17263]	BASALT [17263]									VOL					WR [17263]	50.88	1.49		16.31				10.57	9.04	7.1	0.16		1.11	3.02	0.31
[17263]	CONVERGENT MARGIN	HONSHU ARC / SOUTHWESTERN HONSHU ARC / KYUSHU/OJIKA JIMA		33.2023	33.2023	129.017	129.017	SAE			s_NAG9637 [17263]	BASALT [17263]									VOL					WR [17263]	50.47	1.64		17.08				11.2	8.54	6.44	0.17		1.06	3.06	0.33
[17263]	CONVERGENT MARGIN	HONSHU ARC / SOUTHWESTERN HONSHU ARC / KYUSHU/UKU JIMA		33.2812	33.2812	129.086	129.086	SAE			s_NAG03110 [17263]	BASALT [17263]									VOL					WR [17263]	54.21	2.41		15.16				12.15	6.87	3.53	0.16		1.54	3.48	0.49
[17263]	CONVERGENT MARGIN	HONSHU ARC / SOUTHWESTERN HONSHU ARC / KYUSHU/UKU JIMA		33.273	33.273	129.087	129.087	SAE			s_NAG03111 [17263]	BASALT [17263]									VOL					WR [17263]	53.58	2.54		14.72				13.1	7.05	3.21	0.2		1.49	3.46	0.66
[17263]	CONVERGENT MARGIN	HONSHU ARC / SOUTHWESTERN HONSHU ARC / KYUSHU/UKU JIMA		33.2635	33.2635	129.075	129.075	SAE			s_NAG03120E [17263]	BASALT [17263]									VOL					WR [17263]	52.59	2.21		16.21				12.62	8.75	3.12	0.31		0.77	3.02	0.4
[17263]	CONVERGENT MARGIN	HONSHU ARC / SOUTHWESTERN HONSHU ARC / KYUSHU/UKU JIMA		33.2678	33.2678	129.073	129.073	SAE			s_NAG03123B [17263]	BASALT [17263]									VOL					WR [17263]	52.44	3.17		15.03				13.98	6.65	2.71	0.16		1.62	3.67	0.57
[17263]	CONVERGENT MARGIN	HONSHU ARC / SOUTHWESTERN HONSHU ARC / KYUSHU/UKU JIMA		33.2591	33.2591	129.128	129.128	SAE			s_NAG03112 [17263]	BASALT [17263]									VOL					WR [17263]	51.19	2.59		16.05				12.16	9	4.82	0.16		0.56	3.1	0.36
[17263]	CONVERGENT MARGIN	HONSHU ARC / SOUTHWESTERN HONSHU ARC / KYUSHU/UKU JIMA		33.2648	33.2648	129.143	129.143	SAE			s_NAG03106 [17263]	BASALT [17263]									VOL					WR [17263]	48.74	3.44		17.28				14.91	7.54	3.55	0.2		0.59	3.16	0.58
[17263]	CONVERGENT MARGIN	HONSHU ARC / SOUTHWESTERN HONSHU ARC / KYUSHU/KAMIGOTO		33.0522	33.0522	129.078	129.078	SAE			s_FKT05104 [17263]	BASALT [17263]									VOL					WR [17263]	48.09	1.63		16.33				11.26	10.32	8.82	0.16		0.58	2.55	0.26
[17263]	CONVERGENT MARGIN	HONSHU ARC / SOUTHWESTERN HONSHU ARC / KYUSHU/KAMIGOTO		33.0544	33.0544	129.08	129.08	SAE			s_FKT05105 [17263]	BASALT [17263]									VOL					WR [17263]	47.93	1.59		16.64				11.25	10.71	8.45	0.16		0.43	2.59	0.26
[17263]	CONVERGENT MARGIN	HONSHU ARC / SOUTHWESTERN HONSHU ARC / KYUSHU/KAMIGOTO		33.0553	33.0553	129.079	129.079	SAE			s_FKT05107 [17263]	BASALT [17263]									VOL					WR [17263]	49.11	1.5		16.08				10.72	10.41	8.46	0.16		0.57	2.78	0.21
[17263]	CONVERGENT MARGIN	HONSHU ARC / SOUTHWESTERN HONSHU ARC / KYUSHU/KAMIGOTO		33.0555	33.0555	129.079	129.079	SAE			s_FKT05108 [17263]	BASALT [17263]									VOL					WR [17263]	48.32	1.57		16.41				11.01	10.45	8.85	0.16		0.38	2.63	0.23
[17263]	CONVERGENT MARGIN	HONSHU ARC / SOUTHWESTERN HONSHU ARC / GOTO ISLANDS/FUKUE-JIMA	KISHUKU	32.7517	32.7517	128.764	128.764	SAE			s_FKT9607 [17263]	BASALT [17263]									VOL					WR [17263]	50.73	1.9		18.06				9.99	7.7	4.89	0.17		1.99	3.94	0.62
[17263]	CONVERGENT MARGIN	HONSHU ARC / SOUTHWESTERN HONSHU ARC / KYUSHU/KISHUKU	KISHUKU	32.7659	32.7659	128.758	128.758	SAE			s_FKT05101 [17263]	BASALT [17263]									VOL					WR [17263]	49.69	1.94		17.56				11.08	8.06	5.09	0.19		1.86	4	0.52
[17263]	CONVERGENT MARGIN	HONSHU ARC / SOUTHWESTERN HONSHU ARC / GOTO ISLANDS/FUKUE-JIMA	KISHUKU	32.7656	32.7656	128.755	128.755	SAE			s_FKT05102 [17263]	BASALT [17263]									VOL					WR [17263]	49.3	1.99		18.1				11.48	7.91	4.73	0.19		1.9	3.87	0.53
[17263]	CONVERGENT MARGIN	HONSHU ARC / SOUTHWESTERN HONSHU ARC / KYUSHU/SAGANO SHIMA		32.6926	32.6926	128.596	128.596	SAE			s_FKT04102 [17263]	BASALT [17263]									VOL					WR [17263]	50.65	1.89		17.64				11.26	7.22	4.91	0.23		1.74	3.73	0.72
[17263]	CONVERGENT MARGIN	HONSHU ARC / SOUTHWESTERN HONSHU ARC / KYUSHU/SAGANO SHIMA		32.6954	32.6954	128.584	128.584	SAE			s_FKT04103 [17263]	BASALT [17263]									VOL					WR [17263]	53.03	1.63		17.43				9.22	7.15	4.56	0.18		2.05	4.21	0.53
[17263]	CONVERGENT MARGIN	HONSHU ARC / SOUTHWESTERN HONSHU ARC / GOTO ISLANDS/FUKUE-JIMA	MASUDA	32.6584	32.6584	128.766	128.766	SAE			s_FKT9610 [17263]	BASALT [17263]									VOL					WR [17263]	51.68	1.79		16.96				9.92	8.07	5.98	0.16		1.38	3.71	0.36
[17263]	CONVERGENT MARGIN	HONSHU ARC / SOUTHWESTERN HONSHU ARC / GOTO ISLANDS/FUKUE-JIMA	MASUDA	32.6695	32.6695	128.797	128.797	SAE			s_FKT03019 [17263]	BASALT [17263]									VOL					WR [17263]	52.29	1.46		16.89				9.58	8.46	6.36	0.14		1.11	3.38	0.3
[17263]	CONVERGENT MARGIN	HONSHU ARC / SOUTHWESTERN HONSHU ARC / KYUSHU/MIRAKU		32.7153	32.7153	128.7	128.7	SAE			s_FKT9608 [17263]	BASALT [17263]									VOL					WR [17263]	54.52	1.33		16.8				8.78	8.18	5.26	0.14		1.2	3.49	0.29
[17263]	CONVERGENT MARGIN	HONSHU ARC / SOUTHWESTERN HONSHU ARC / KYUSHU/MIRAKU		32.7125	32.7125	128.677	128.677	SAE			s_FKT03002 [17263]	BASALT [17263]									VOL					WR [17263]	54.55	1.26		16.36				9.5	8.42	5.69	0.13		0.8	3.09	0.21
[17263]	CONVERGENT MARGIN	HONSHU ARC / SOUTHWESTERN HONSHU ARC / GOTO ISLANDS/FUKUE-JIMA	TOMIE	32.629	32.629	128.763	128.763	SAE			s_FKT03011 [17263]	BASALT [17263]									VOL					WR [17263]	52.33	1.41		16.62				10	8.67	6.96	0.15		0.66	2.95	0.24
[17263]	CONVERGENT MARGIN	HONSHU ARC / SOUTHWESTERN HONSHU ARC / GOTO ISLANDS/FUKUE-JIMA / ONIDAKE		32.6525	32.6525	128.803	128.803	SAE			s_FKT9611 [17263]	BASALT [17263]									VOL					WR [17263]	49.04	1.64		17.47				10.08	9.23	7.36	0.17		1.43	3.21	0.38
[17263]	CONVERGENT MARGIN	HONSHU ARC / SOUTHWESTERN HONSHU ARC / GOTO ISLANDS/FUKUE-JIMA / ONIDAKE		32.6745	32.6745	128.863	128.863	SAE			s_FKT9614 [17263]	BASALT [17263]									VOL					WR [17263]	48.8	1.84		17.09				9.69	9.48	8.18	0.18		1.2	3.2	0.34
[17263]	CONVERGENT MARGIN	HONSHU ARC / SOUTHWESTERN HONSHU ARC / GOTO ISLANDS/FUKUE-JIMA / ONIDAKE		32.6534	32.6534	128.821	128.821	SAE			s_FKT03021 [17263]	BASALT [17263]									VOL					WR [17263]	50.14	1.72		17.34				11.48	7.93	5.6	0.2		1.53	3.6	0.47
[17263]	CONVERGENT MARGIN	HONSHU ARC / SOUTHWESTERN HONSHU ARC / GOTO ISLANDS/FUKUE-JIMA	USUDAKE	32.6643	32.6643	128.885	128.885	SAE			s_FKT03015 [17263]	BASALT [17263]									VOL					WR [17263]	50.11	1.6		17.24				10.29	8.28	6.64	0.17		1.49	3.75	0.43
[17263]	CONVERGENT MARGIN	HONSHU ARC / SOUTHWESTERN HONSHU ARC / GOTO ISLANDS/FUKUE-JIMA	MINODAKE	32.6587	32.6587	128.884	128.884	SAE			s_FKT03017 [17263]	BASALT [17263]									VOL					WR [17263]	49.84	1.53		17.14				10.6	8.86	7.05	0.18		1.06	3.37	0.37
[17263]	CONVERGENT MARGIN	HONSHU ARC / SOUTHWESTERN HONSHU ARC / GOTO ISLANDS/FUKUE-JIMA	MINODAKE	32.6587	32.6587	128.884	128.884	SAE			s_FKT04106 [17263]	BASALT [17263]									VOL					WR [17263]	52.1	1.34		16.71				10.03	8.77	7.06	0.16		0.63	2.98	0.23
[17263]	CONVERGENT MARGIN	HONSHU ARC / SOUTHWESTERN HONSHU ARC / GOTO ISLANDS/FUKUE-JIMA	MINODAKE	32.6587	32.6587	128.884	128.884	SAE			s_FKT04107 [17263]	BASALT [17263]									VOL					WR [17263]	48.69	1.59		17.14				10.29	9.41	7.44	0.2		1.36	3.49	0.39
[17263]	CONVERGENT MARGIN	HONSHU ARC / SOUTHWESTERN HONSHU ARC / GOTO ISLANDS/FUKUE-JIMA	MINODAKE	32.6587	32.6587	128.884	128.884	SAE			s_FKT04109 [17263]	BASALT [17263]									VOL					WR [17263]	50.09	1.61		17.39				9.99	8.57	6.5	0.2		1.43	3.79	0.44
[17263]	CONVERGENT MARGIN	HONSHU ARC / SOUTHWESTERN HONSHU ARC / GOTO ISLANDS/FUKUE-JIMA	E. MINODAKE	32.6587	32.6587	128.884	128.884	SAE			s_FKT04110 [17263]	BASALT [17263]									VOL					WR [17263]	48.85	1.66		18				10.8	9.13	6.95	0.2		0.81	3.25	0.34
[17263]	CONVERGENT MARGIN	HONSHU ARC / SOUTHWESTERN HONSHU ARC / GOTO ISLANDS/FUKUE-JIMA	USUDAKE	32.6669	32.6669	128.884	128.884	SAE			s_FKT04104 [17263]	BASALT [17263]									VOL					WR [17263]	50.11	1.64		17.24				9.93	8.58	6.37	0.19		1.52	3.94	0.49
[17263]	CONVERGENT MARGIN	HONSHU ARC / SOUTHWESTERN HONSHU ARC / GOTO ISLANDS/FUKUE-JIMA		32.6729	32.6729	128.873	128.873	SAE			s_FKT04105 [17263]	BASALT [17263]									VOL					WR [17263]	50.16	1.61		17.1				10.03	8.5	6.75	0.19		1.48	3.74	0.43
[4019]	CONVERGENT MARGIN	HONSHU ARC / SOUTHWESTERN HONSHU ARC / SHODO-SHIMA / KANKAKEI FORMATION	MITO PENINSULA, SETOUCHI VOLCANIC BELT	34.45	34.45	134.17	134.17	SAE			s_MDYB-2 [4019]	ANDESITE [4019]				MIOCENE [4019]					VOL					WR [4019]	57.31	0.59		15.81				5.79	6.46	6.24	0.14		2.28	3.12	0.17
[5786][3192][3193][9206][13628][9693][4019]	CONVERGENT MARGIN	HONSHU ARC / SOUTHWESTERN HONSHU ARC / SHODO-SHIMA / KANKAKEI FORMATION	MITO PENINSULA, SETOUCHI VOLCANIC BELT	34.45	34.45	134.17	134.17	SAE			s_SD261 [5786] / s_SD-261 [3192]	ANDESITE [5786] / ANDESITE, AUGITE-OLIVINE [3193]	13000000 [5786] / 11000000 [3193] / 13200000 [9693]	13000000 [5786] / 12000000 [3193] / 13200000 [9693]	MIDDLE [3192]	MIOCENE [3192]					VOL					WR [5786]	55.37	0.65		15.55		2.27	4.13	6.23	7.04	6.89	0.17		2.25	2.84	0.17		1.54	0.42
[3193][3192][2326][3182]	CONVERGENT MARGIN	HONSHU ARC / SOUTHWESTERN HONSHU ARC / SHODO-SHIMA / KANKAKEI FORMATION	MITO PENINSULA, SETOUCHI VOLCANIC BELT	34.45	34.45	134.17	134.17	SAE			s_SD-264 [3193] / s_SD264 [3182]	ANDESITE, AUGITE-OLIVINE [3193] / ANDESITE [3192]	11000000 [3193]	12000000 [3193]	MIDDLE [3192]	MIOCENE [3192]					VOL					WR [3193]	58.42	0.65		15.9		1.67	4.06		6.59	6.05	0.15		2.58	2.98	0.15		1.13	0.1
[3192][3182]	CONVERGENT MARGIN	HONSHU ARC / SOUTHWESTERN HONSHU ARC / SHODO-SHIMA / KANKAKEI FORMATION	MITO PENINSULA, SETOUCHI VOLCANIC BELT	34.45	34.45	134.17	134.17	SAE			s_SD-265 [3192] / s_SD265 [3182]	ANDESITE [3192]			MIDDLE [3192]	MIOCENE [3192]					VOL					WR [3192]	55.52	0.64		15.74		2.69	3.74		7.15	7.21	0.16		2.19	2.76	0.17		1.68	0.52
[4019][3193][3192][3182][9693]	CONVERGENT MARGIN	HONSHU ARC / SOUTHWESTERN HONSHU ARC / SHODO-SHIMA / KANKAKEI FORMATION	MITO PENINSULA, SETOUCHI VOLCANIC BELT	34.45	34.45	134.17	134.17	SAE			s_SD407 [4019] / s_SD-407 [3193]	ANDESITE [4019] / ANDESITE, AUGITE-OLIVINE [3193]	11000000 [3193] / 13200000 [9693]	12000000 [3193] / 13200000 [9693]	MIDDLE [3192]	MIOCENE [4019]					VOL					WR [4019]	56.12	0.62		15.38		2.01	4.27	6.18	6.87	7.61	0.14		2.38	2.87	0.16		0.75	0.05
[4019][7862][3182][9693]	CONVERGENT MARGIN	HONSHU ARC / SOUTHWESTERN HONSHU ARC / SHODO-SHIMA / KANKAKEI FORMATION	MITO PENINSULA, SETOUCHI VOLCANIC BELT	34.45	34.45	134.17	134.17	SAE			s_SD411 [4019]	ANDESITE [4019]	13200000 [9693]	13200000 [9693]	MIDDLE [3182]	MIOCENE [4019]					VOL					WR [4019]	55.8	0.61		15.41		1.03	5.81	6.15	6.92	7.77	0.14		2.42	2.64	0.16
[3193][3182][9693]	CONVERGENT MARGIN	HONSHU ARC / SOUTHWESTERN HONSHU ARC / SHODO-SHIMA / KANKAKEI FORMATION	MITO PENINSULA, SETOUCHI VOLCANIC BELT	34.45	34.45	134.17	134.17	SAE			s_SD-424 [3193] / s_SD424 [3182]	BASALT, AUGITE-OLIVINE [3193] / BASALT [3182]	11000000 [3193] / 13200000 [9693]	12000000 [3193] / 13200000 [9693]	MIDDLE [3182]	MIOCENE [3182]					VOL					WR [3193]	48.79	0.97		13.46		2.27	6.76		10.09	10.59	0.18		1.35	2.46	0.23		2.45	0.12
[3193][3182]	CONVERGENT MARGIN	HONSHU ARC / SOUTHWESTERN HONSHU ARC / SHODO-SHIMA / KANKAKEI FORMATION	MITO PENINSULA, SETOUCHI VOLCANIC BELT	34.45	34.45	134.17	134.17	SAE			s_SD-438 [3193] / s_SD438 [3182]	BASALT, AUGITE-OLIVINE [3193] / BASALT [3182]	11000000 [3193]	12000000 [3193]	MIDDLE [3182]	MIOCENE [3182]					VOL					WR [3193]	49.2	1.01		15.31		2.77	6.28		8.81	11.55	0.16		1.27	2.57	0.22		0.76	0.22
[3512][3193]	CONVERGENT MARGIN	HONSHU ARC / SOUTHWESTERN HONSHU ARC / SHODO-SHIMA / KANKAKEI FORMATION	MITO PENINSULA, SETOUCHI VOLCANIC BELT	34.45	34.45	134.17	134.17	SAE			s_SD801 [3512] / s_SD-801 [3193]	NOT GIVEN [3512] / ANDESITE, HORNBLENDE-OLIVINE [3193]	11000000 [3193]	12000000 [3193]		MIOCENE [3512]					VOL					GL [3512] / WR [3193]	72.68	0.05		15.17		1.95	4.54	0.92	1.77	0.16	0.08		3.67	3.79	0.07		1.09	0.12
[3512][3193]	CONVERGENT MARGIN	HONSHU ARC / SOUTHWESTERN HONSHU ARC / SHODO-SHIMA / KANKAKEI FORMATION	MITO PENINSULA, SETOUCHI VOLCANIC BELT	34.45	34.45	134.17	134.17	SAE			s_SD802 [3512] / s_SD-802 [3193]	NOT GIVEN [3512] / ANDESITE, OLIVINE-AUGITE-BRONZITE [3193]	11000000 [3193]	12000000 [3193]		MIOCENE [3512]					VOL					GL [3512] / WR [3193]	72.51	0.06		14.9		2.47	3.5	1.15	1.61	0.18	0.08		3.71	3.79	0.07		0.93	0.35
[3512][3193]	CONVERGENT MARGIN	HONSHU ARC / SOUTHWESTERN HONSHU ARC / SHODO-SHIMA / KANKAKEI FORMATION	MITO PENINSULA, SETOUCHI VOLCANIC BELT	34.45	34.45	134.17	134.17	SAE			s_SD803 [3512] / s_SD-803 [3193]	RHYOLITE [3512] / ANDESITE, OLIVINE-AUGITE-BRONZITE [3193]	11000000 [3193]	12000000 [3193]		MIOCENE [3512]					VOL					WR [3512]	72.26	0.02		14.54		3.9	2.42	0.79	1.33	0.1	0.07		4.01	3.41	0.06		1.38	0.45
[3512][3193]	CONVERGENT MARGIN	HONSHU ARC / SOUTHWESTERN HONSHU ARC / SHODO-SHIMA / KANKAKEI FORMATION	MITO PENINSULA, SETOUCHI VOLCANIC BELT	34.45	34.45	134.17	134.17	SAE			s_SD804 [3512] / s_SD-804 [3193]	RHYOLITE [3512] / ANDESITE, OLIVINE-BRONZITE [3193]	11000000 [3193]	12000000 [3193]		MIOCENE [3512]					VOL					WR [3512]	71.94	0.02		14.48		1.99	2.48	0.83	1.33	0.13	0.08		4.22	3.19	0.06		0.25	0.4
[3193]	CONVERGENT MARGIN	HONSHU ARC / SOUTHWESTERN HONSHU ARC / SHODO-SHIMA / KANKAKEI FORMATION	MITO PENINSULA, SETOUCHI VOLCANIC BELT	34.45	34.45	134.17	134.17	SAE			s_SD-805 [3193]	ANDESITE, BRONZITE [3193]	11000000 [3193]	12000000 [3193]							VOL					WR [3193]	63.45	0.64		16.27		2.46	1.77		4.64	3.46	0.07		2.37	3.57	0.16		1.12	0.5
[4019][7862][13628][9693]	CONVERGENT MARGIN	HONSHU ARC / SOUTHWESTERN HONSHU ARC / SHODO-SHIMA / KANKAKEI FORMATION	MITO PENINSULA, SETOUCHI VOLCANIC BELT	34.45	34.45	134.17	134.17	SAE			s_SDSYB [4019]	BASALT [4019] / NOT GIVEN [7862]	13200000 [9693]	13200000 [9693]		MIOCENE [4019]					SED					WR [4019]	48.95	1.02		14.69		1.53	8.68	9.19	8.75	11.79	0.17		1.2	2.57	0.27
[3921][3126]	CONVERGENT MARGIN	HONSHU ARC / NORTHEASTERN HONSHU ARC / HONSHU / MEGATA - ICHINOMEGATA MAAR	OGA PENINSULA, AKITA PREFECTURE	39.95	39.95	139.73	139.73	SAE			s_2102 [3921]	AMPHIBOLITE, HORNBLENDE-PLAGIOCLASE-CLINOPYROXENE-MAGNETITE-APATITE [3921] / AMPHIBOLITE [3126]	10000 [3921]	10000 [3921]							MET					WR [3921]	44.63	0.99		13.97	0.09	4.55	6.14		11.53	12.13	0.19		0.4	1.57	0.14		2.31	0.89
[3921][3126][3124]	CONVERGENT MARGIN	HONSHU ARC / NORTHEASTERN HONSHU ARC / HONSHU / MEGATA - ICHINOMEGATA MAAR	OGA PENINSULA, AKITA PREFECTURE	39.95	39.95	139.73	139.73	SAE			s_2203 [3921]	AMPHIBOLITE, HORNBLENDE-PLAGIOCLASE-MAGNETITE-CLINOPYROXENE-APATITE [3921] / AMPHIBOLITE [3126]	10000 [3921]	10000 [3921]							MET					WR [3921]	38.63	1.27		22.59		6.51	6.22		12.2	6.45	0.18		0.31	1.71	0.29		1.85	1.56
[3921][3126]	CONVERGENT MARGIN	HONSHU ARC / NORTHEASTERN HONSHU ARC / HONSHU / MEGATA - ICHINOMEGATA MAAR	OGA PENINSULA, AKITA PREFECTURE	39.95	39.95	139.73	139.73	SAE			s_2214 [3921]	GABBRO, OLIVINE [3921] / GABBRO, HORNBLENDE [3126]	10000 [3921]	10000 [3921]							PLU					WR [3921]	41.62	1.01		15.26		6.12	6.21		14.83	12.2	0.13		0.17	0.66	0.1		1.54	0.59
[3921][3126][3124]	CONVERGENT MARGIN	HONSHU ARC / NORTHEASTERN HONSHU ARC / HONSHU / MEGATA - ICHINOMEGATA MAAR	OGA PENINSULA, AKITA PREFECTURE	39.95	39.95	139.73	139.73	SAE			s_2218 [3921]	GABBRO, HORNBLENDE-ORTHOPYROXENE-CLINOPYROXENE [3921] / GABBRO, PYROXENE [3126]	10000 [3921]	10000 [3921]							PLU					WR [3921]	45.63	0.9		15.09		3.28	7.7		10.22	13.68	0.29		0.1	1.28	0.05		1.06	0.34
[3921][3126][3124]	CONVERGENT MARGIN	HONSHU ARC / NORTHEASTERN HONSHU ARC / HONSHU / MEGATA - ICHINOMEGATA MAAR	OGA PENINSULA, AKITA PREFECTURE	39.95	39.95	139.73	139.73	SAE			s_2222 [3921]	HORNBLENDITE, PLAGIOCLASE-CLINOPYROXENE-ORTHOPYROXENE [3921] / HORNBLENDITE [3126] / GABBRO, HORNBLENDE [3124]	10000 [3921]	10000 [3921]							PLU					WR [3921]	43.96	0.95		16.82		3.42	5.83		13.71	12.29	0.1		0.34	1.21	0.01		1.47	0.38
[3921][3126][3124]	CONVERGENT MARGIN	HONSHU ARC / NORTHEASTERN HONSHU ARC / HONSHU / MEGATA - ICHINOMEGATA MAAR	OGA PENINSULA, AKITA PREFECTURE	39.95	39.95	139.73	139.73	SAE			s_2233 [3921]	GABBRO, HORNBLENDE-ORTHOPYROXENE-CLINOPYROXENE [3921] / GABBRO, PYROXENE [3126]	10000 [3921]	10000 [3921]							PLU					WR [3921]	48.32	0.37		16.55		2.43	5.29		11.23	12.55	0.1		0.12	1.94	0.02		0.93	0.2
[3921][3124]	CONVERGENT MARGIN	HONSHU ARC / NORTHEASTERN HONSHU ARC / HONSHU / MEGATA - ICHINOMEGATA MAAR	OGA PENINSULA, AKITA PREFECTURE	39.95	39.95	139.73	139.73	SAE			s_2252 [3921]	AMPHIBOLITE, HORNBLENDE-PLAGIOCLASE-MAGNETITE-OLIVINE-CLINOPYROXENE-APATITE [3921] / AMPHIBOLITE [3124]	10000 [3921]	10000 [3921]							MET					WR [3921]	40.48	1.17		21.64	0.01	5.02	5.3		13.5	7.72	0.18		0.5	1.46	0.29		1.9	0.65
[3921][3124]	CONVERGENT MARGIN	HONSHU ARC / NORTHEASTERN HONSHU ARC / HONSHU / MEGATA - ICHINOMEGATA MAAR	OGA PENINSULA, AKITA PREFECTURE	39.95	39.95	139.73	139.73	SAE			s_2305 [3921]	HORNBLENDITE, CLINOPYROXENE [3921] / GABBRO, HORNBLENDE [3124]	10000 [3921]	10000 [3921]							PLU					WR [3921]	43.97	1.18		11.31		4.92	7.09		16.15	11.87	0.15		0.39	1.23	0.04		1.46	0.19
[3332]	CONVERGENT MARGIN	HONSHU ARC / NORTHEASTERN HONSHU ARC / HONSHU / MEGATA - ICHINOMEGATA MAAR	OGA PENINSULA, AKITA PREFECTURE	39.95	39.95	139.73	139.73	SAE			s_6982312 [3332]	LHERZOLITE, GARNET, XENOLITH [3332]								GRANOBLASTIC EQUIGRANUAR, MEDIUM- TO COARSE-GRAINED MATRIX [3332]	PER					WR [3332]	45.03	0.2		2.75	0.4	1.69	6.59		2.72	39.89	0.13		0.09	0.27	0		0.32	0.07
[3126]	CONVERGENT MARGIN	HONSHU ARC / NORTHEASTERN HONSHU ARC / HONSHU / MEGATA - ICHINOMEGATA MAAR	OGA PENINSULA, AKITA PREFECTURE	39.95	39.95	139.73	139.73	SAE			s_6982313 [3126]	LHERZOLITE, GARNET, XENOLITH [3126]									PER					WR [3126]
[3332][3126]	CONVERGENT MARGIN	HONSHU ARC / NORTHEASTERN HONSHU ARC / HONSHU / MEGATA - ICHINOMEGATA MAAR	OGA PENINSULA, AKITA PREFECTURE	39.95	39.95	139.73	139.73	SAE			s_6982314 [3332]	LHERZOLITE, SPINEL, XENOLITH [3332]								GRANOBLASTIC EQUIGRANUAR, MEDIUM- TO COARSE-GRAINED MATRIX [3332]	PER					WR [3332]	44.85	0.56		2.92	0.39	2.03	8.1		7.24	33.24	0.16		0	0.18			0.25	0.13
[3332][3126]	CONVERGENT MARGIN	HONSHU ARC / NORTHEASTERN HONSHU ARC / HONSHU / MEGATA - ICHINOMEGATA MAAR	OGA PENINSULA, AKITA PREFECTURE	39.95	39.95	139.73	139.73	SAE			s_6982401 [3332]	LHERZOLITE, GARNET, XENOLITH [3332]								GRANOBLASTIC EQUIGRANUAR, MEDIUM- TO COARSE-GRAINED MATRIX [3332]	PER					WR [3332]	45.1	0.13		3.4	0.38	1.49	6.75		2.76	39.22	0.13		0	0.24			0.28	0.05
[3332]	CONVERGENT MARGIN	HONSHU ARC / NORTHEASTERN HONSHU ARC / HONSHU / MEGATA - ICHINOMEGATA MAAR	OGA PENINSULA, AKITA PREFECTURE	39.95	39.95	139.73	139.73	SAE			s_6982408 [3332]	LHERZOLITE, SPINEL, XENOLITH [3332]								GRANOBLASTIC EQUIGRANUAR, MEDIUM- TO COARSE-GRAINED MATRIX [3332]	PER					WR [3332]	44.48	0.22		2.48	0.44	1.84	7.25		3.24	39.64	0.15		0.04	0.15			0.3	0.1
[4719]	CONVERGENT MARGIN	HONSHU ARC / NORTHEASTERN HONSHU ARC / HONSHU / MEGATA - ICHINOMEGATA MAAR	OGA PENINSULA, AKITA PREFECTURE	39.95	39.95	139.73	139.73	SAE			s_7181004 [4719]	WEBSTERITE, GARNET, XENOLITH [4719]									PER					WR [4719]	48.42	0.79		8.41	0.37	1.25	6.66		16.99	15.57	0.17		0.01	0.69	0.02		0.89	0.26
[3920][3126]	CONVERGENT MARGIN	HONSHU ARC / NORTHEASTERN HONSHU ARC / HONSHU / MEGATA - ICHINOMEGATA MAAR	OGA PENINSULA, AKITA PREFECTURE	39.95	39.95	139.73	139.73	SAE			s_7772710 [3920]	ANDESITE, BIOTITE-HORNBLENDE [3920] / ANDESITE, HORNBLENDE-BIOTITE [3126]									VOL					WR [3920]	60.65	1.12		16.41		1.73	2.81		5.57	3.36	0.15		2.29	3.38	0.29	2.05
[22139]	CONVERGENT MARGIN	HONSHU ARC / NORTHEASTERN HONSHU ARC / HONSHU / MEGATA - ICHINOMEGATA MAAR	OGA PENINSULA, AKITA PREFECTURE	39.95	39.95	139.73	139.73	SAE			s_HG-08 [22139]	GABBRO, HORNBLENDE [22139]									PLU					WR [22139]	41.31	0.4		29.69				7.25	16.45	2.22	0.11		0.16	1.51	0.9
[22139]	CONVERGENT MARGIN	HONSHU ARC / NORTHEASTERN HONSHU ARC / HONSHU / MEGATA - ICHINOMEGATA MAAR	OGA PENINSULA, AKITA PREFECTURE	39.95	39.95	139.73	139.73	SAE			s_HG-11 [22139]	GABBRO, HORNBLENDE [22139]									PLU					WR [22139]	38.6	0.88		22.79				15.7	13.83	5.25	0.23		0.23	1.37	1.12
[4262]	CONVERGENT MARGIN	HONSHU ARC / NORTHEASTERN HONSHU ARC / HONSHU / MEGATA - ICHINOMEGATA MAAR	OGA PENINSULA, AKITA PREFECTURE	39.95	39.95	139.73	139.73	SAE			s_HK63111602A [4262]	PERIDOTITE, XENOLITH [4262]									PER					WR [4262]	44.02	0		1.03	0.42	0.83	7.06		0	46.99	0.11		0	0.05	0		0.09	0
[3332]	CONVERGENT MARGIN	HONSHU ARC / NORTHEASTERN HONSHU ARC / HONSHU / MEGATA - ICHINOMEGATA MAAR	OGA PENINSULA, AKITA PREFECTURE	39.95	39.95	139.73	139.73	SAE			s_HK64081205B [3332]	LHERZOLITE, SPINEL, XENOLITH [3332]								GRANOBLASTIC EQUIGRANUAR, MEDIUM- TO COARSE-GRAINED MATRIX [3332]	PER					WR [3332]	42.8	0.23		2.47	0.41	1.67	8.64		3.61	39.16	0.17		0.04	0.14	0		0.4	0.07
[3126]	CONVERGENT MARGIN	HONSHU ARC / NORTHEASTERN HONSHU ARC / HONSHU / MEGATA - ICHINOMEGATA MAAR	OGA PENINSULA, AKITA PREFECTURE	39.95	39.95	139.73	139.73	SAE			s_HK64081206D [3126]	LHERZOLITE, SPINEL, XENOLITH [3126]									PER					WR [3126]
[3332]	CONVERGENT MARGIN	HONSHU ARC / NORTHEASTERN HONSHU ARC / HONSHU / MEGATA - ICHINOMEGATA MAAR	OGA PENINSULA, AKITA PREFECTURE	39.95	39.95	139.73	139.73	SAE			s_HK67051201 [3332]	LHERZOLITE, GARNET, XENOLITH [3332]								GRANOBLASTIC EQUIGRANUAR, MEDIUM- TO COARSE-GRAINED MATRIX [3332]	PER					WR [3332]	44.21	0.33		4.93	0.46	2.03	8.87		6.62	31.31	0.18		0.02	0.44			0.54	0.17
[6211]	CONVERGENT MARGIN	HONSHU ARC / NORTHEASTERN HONSHU ARC / HONSHU / MEGATA - ICHINOMEGATA MAAR	OGA PENINSULA, AKITA PREFECTURE	39.95	39.95	139.73	139.73	SAE			s_I-20 [6211]	GABBRO [6211]	10000 [6211]	10000 [6211]						COARSE GRAINED [6211]	PLU			F		WR [6211]	45.6	0.57		18.57		10.26			12.05	11.41	0.16		0.01	1.94	0.11
[6211]	CONVERGENT MARGIN	HONSHU ARC / NORTHEASTERN HONSHU ARC / HONSHU / MEGATA - ICHINOMEGATA MAAR	OGA PENINSULA, AKITA PREFECTURE	39.95	39.95	139.73	139.73	SAE			s_I-21 [6211]	GABBRO [6211]	10000 [6211]	10000 [6211]						COARSE GRAINED [6211]	PLU			F		WR [6211]	41.79	1.16		16.82		13.23			11.82	11.7	0.23		0.87	2	0.22
[6211]	CONVERGENT MARGIN	HONSHU ARC / NORTHEASTERN HONSHU ARC / HONSHU / MEGATA - ICHINOMEGATA MAAR	OGA PENINSULA, AKITA PREFECTURE	39.95	39.95	139.73	139.73	SAE			s_I-23 [6211]	GABBRO [6211]	10000 [6211]	10000 [6211]						COARSE GRAINED [6211]	PLU			F		WR [6211]	42.22	0.45		28.51		9.44			14.81	2.27	0.13		0.11	1.62	0.54
[6211]	CONVERGENT MARGIN	HONSHU ARC / NORTHEASTERN HONSHU ARC / HONSHU / MEGATA - ICHINOMEGATA MAAR	OGA PENINSULA, AKITA PREFECTURE	39.95	39.95	139.73	139.73	SAE			s_I-24 [6211]	GABBRO [6211]	10000 [6211]	10000 [6211]						COARSE GRAINED [6211]	PLU			F		WR [6211]	41.87	1.73		21.1		10.01			13.57	9.65	0.15		0.44	1.97	0.12
[6211]	CONVERGENT MARGIN	HONSHU ARC / NORTHEASTERN HONSHU ARC / HONSHU / MEGATA - ICHINOMEGATA MAAR	OGA PENINSULA, AKITA PREFECTURE	39.95	39.95	139.73	139.73	SAE			s_I-25 [6211]	GABBRO [6211]	10000 [6211]	10000 [6211]						COARSE GRAINED [6211]	PLU			F		WR [6211]	45.71	1.24		22.19		10.92			10.34	7.37	0.13		0.08	2.68	0.11
[6211]	CONVERGENT MARGIN	HONSHU ARC / NORTHEASTERN HONSHU ARC / HONSHU / MEGATA - ICHINOMEGATA MAAR	OGA PENINSULA, AKITA PREFECTURE	39.95	39.95	139.73	139.73	SAE			s_I-27 [6211]	GABBRO [6211]	10000 [6211]	10000 [6211]						COARSE GRAINED [6211]	PLU			F		WR [6211]	42.86	1.41		18.71		10.62			12.99	10.51	0.17		0.32	1.72	0.06
[6211]	CONVERGENT MARGIN	HONSHU ARC / NORTHEASTERN HONSHU ARC / HONSHU / MEGATA - ICHINOMEGATA MAAR	OGA PENINSULA, AKITA PREFECTURE	39.95	39.95	139.73	139.73	SAE			s_I-29 [6211]	GABBRO, HORNBLENDE-HYPERSTHENE [6211]	10000 [6211]	10000 [6211]						COARSE GRAINED [6211]	PLU			F		WR [6211]	48.06	0.37		16.79		12.07	7.47		8.45	13.77	0.21		0.06	1.27	0.11		0.86	0.03
[6211]	CONVERGENT MARGIN	HONSHU ARC / NORTHEASTERN HONSHU ARC / HONSHU / MEGATA - ICHINOMEGATA MAAR	OGA PENINSULA, AKITA PREFECTURE	39.95	39.95	139.73	139.73	SAE			s_I-30 [6211]	GABBRO, AUGITE-HYPERSTHENE-HORNBLENDE [6211]	10000 [6211]	10000 [6211]						COARSE GRAINED [6211]	PLU			F		WR [6211]	43.57	1.11		18.11		10.14	6.15		13.68	11.09	0.16		0.41	1.93	0.1		1.43	0.1
[6211]	CONVERGENT MARGIN	HONSHU ARC / NORTHEASTERN HONSHU ARC / HONSHU / MEGATA - ICHINOMEGATA MAAR	OGA PENINSULA, AKITA PREFECTURE	39.95	39.95	139.73	139.73	SAE			s_I-301 [6211]	GABBRO [6211]	10000 [6211]	10000 [6211]						COARSE GRAINED [6211]	PLU			F		WR [6211]	51.84	2.06		17.17		10.64			6.78	6.14	0.17		1.22	4.66	0.37
[6211]	CONVERGENT MARGIN	HONSHU ARC / NORTHEASTERN HONSHU ARC / HONSHU / MEGATA - ICHINOMEGATA MAAR	OGA PENINSULA, AKITA PREFECTURE	39.95	39.95	139.73	139.73	SAE			s_I-33 [6211]	GABBRO [6211]	10000 [6211]	10000 [6211]						COARSE GRAINED [6211]	PLU			F		WR [6211]	45.02	0.85		25.41		6.92			13.01	7.29	0.08		0.09	2.07	0.1
[6211]	CONVERGENT MARGIN	HONSHU ARC / NORTHEASTERN HONSHU ARC / HONSHU / MEGATA - ICHINOMEGATA MAAR	OGA PENINSULA, AKITA PREFECTURE	39.95	39.95	139.73	139.73	SAE			s_I-34 [6211]	GABBRO [6211]	10000 [6211]	10000 [6211]						COARSE GRAINED [6211]	PLU			F		WR [6211]	45.58	0.9		14.78		12.85			9.89	14.94	0.18		0.16	1.86	0.12
[6211]	CONVERGENT MARGIN	HONSHU ARC / NORTHEASTERN HONSHU ARC / HONSHU / MEGATA - ICHINOMEGATA MAAR	OGA PENINSULA, AKITA PREFECTURE	39.95	39.95	139.73	139.73	SAE			s_I-38 [6211]	GABBRO [6211]	10000 [6211]	10000 [6211]						COARSE GRAINED [6211]	PLU			F		WR [6211]	41.18	0.68		25.32		10.42			15.03	4.73	0.17		0.2	1.56	0.59
[6211]	CONVERGENT MARGIN	HONSHU ARC / NORTHEASTERN HONSHU ARC / HONSHU / MEGATA - ICHINOMEGATA MAAR	OGA PENINSULA, AKITA PREFECTURE	39.95	39.95	139.73	139.73	SAE			s_I-51 [6211]	GABBRO [6211]	10000 [6211]	10000 [6211]						COARSE GRAINED [6211]	PLU			F		WR [6211]	43.16	1.19		14.55		11.59			12.57	13.9	0.18		0.61	1.92	0.12
[6211]	CONVERGENT MARGIN	HONSHU ARC / NORTHEASTERN HONSHU ARC / HONSHU / MEGATA - ICHINOMEGATA MAAR	OGA PENINSULA, AKITA PREFECTURE	39.95	39.95	139.73	139.73	SAE			s_I-57 [6211]	GABBRO [6211]	10000 [6211]	10000 [6211]						COARSE GRAINED [6211]	PLU			F		WR [6211]	44.64	1.3		23.55		8.32			13.1	6.82	0.14		0.12	2.7	0.1
[6211]	CONVERGENT MARGIN	HONSHU ARC / NORTHEASTERN HONSHU ARC / HONSHU / MEGATA - ICHINOMEGATA MAAR	OGA PENINSULA, AKITA PREFECTURE	39.95	39.95	139.73	139.73	SAE			s_I-59 [6211]	DOLERITE [6211]	10000 [6211]	10000 [6211]						COARSE GRAINED [6211]	VOL			F		WR [6211]	43.45	0.54		26.17		10.14	4.39		13.44	3.24	0.17		0.15	2.03	0.58		1.44	0.1
[6211]	CONVERGENT MARGIN	HONSHU ARC / NORTHEASTERN HONSHU ARC / HONSHU / MEGATA - ICHINOMEGATA MAAR	OGA PENINSULA, AKITA PREFECTURE	39.95	39.95	139.73	139.73	SAE			s_I-61 [6211]	GABBRO [6211]	10000 [6211]	10000 [6211]						COARSE GRAINED [6211]	PLU			F		WR [6211]	42.47	1.11		17.6		12.22			12.22	11.23	0.2		0.62	2.22	0.16
[6211]	CONVERGENT MARGIN	HONSHU ARC / NORTHEASTERN HONSHU ARC / HONSHU / MEGATA - ICHINOMEGATA MAAR	OGA PENINSULA, AKITA PREFECTURE	39.95	39.95	139.73	139.73	SAE			s_I-62 [6211]	GABBRO [6211]	10000 [6211]	10000 [6211]						COARSE GRAINED [6211]	PLU			F		WR [6211]	42.5	1.2		20.21		12.54			12.24	8.02	0.22		0.45	2.46	0.29
[6211]	CONVERGENT MARGIN	HONSHU ARC / NORTHEASTERN HONSHU ARC / HONSHU / MEGATA - ICHINOMEGATA MAAR	OGA PENINSULA, AKITA PREFECTURE	39.95	39.95	139.73	139.73	SAE			s_I-63 [6211]	GABBRO [6211]	10000 [6211]	10000 [6211]						COARSE GRAINED [6211]	PLU			F		WR [6211]	44.33	0.66		14.46		12.35			12.24	15.05	0.2		0.16	2.37	0.14
[6211]	CONVERGENT MARGIN	HONSHU ARC / NORTHEASTERN HONSHU ARC / HONSHU / MEGATA - ICHINOMEGATA MAAR	OGA PENINSULA, AKITA PREFECTURE	39.95	39.95	139.73	139.73	SAE			s_I-65 [6211]	GABBRO [6211]	10000 [6211]	10000 [6211]						COARSE GRAINED [6211]	PLU			F		WR [6211]	42.65	0.64		11.59		13.05			9.03	19.16	0.21		0.48	2.08	0.13
[6211]	CONVERGENT MARGIN	HONSHU ARC / NORTHEASTERN HONSHU ARC / HONSHU / MEGATA - ICHINOMEGATA MAAR	OGA PENINSULA, AKITA PREFECTURE	39.95	39.95	139.73	139.73	SAE			s_I-68 [6211]	GABBRO [6211]	10000 [6211]	10000 [6211]						COARSE GRAINED [6211]	PLU			F		WR [6211]	45.83	1.1		26.43		14.23			13.92	14.56	0.16		0.13	2.07	0.08
[6211]	CONVERGENT MARGIN	HONSHU ARC / NORTHEASTERN HONSHU ARC / HONSHU / MEGATA - ICHINOMEGATA MAAR	OGA PENINSULA, AKITA PREFECTURE	39.95	39.95	139.73	139.73	SAE			s_I-71 [6211]	GABBRO [6211]	10000 [6211]	10000 [6211]						COARSE GRAINED [6211]	PLU			F		WR [6211]	42.19	0.6		20.34		9.96			12.7	11.32	0.16		0.23	1.71	0.11
[6211]	CONVERGENT MARGIN	HONSHU ARC / NORTHEASTERN HONSHU ARC / HONSHU / MEGATA - ICHINOMEGATA MAAR	OGA PENINSULA, AKITA PREFECTURE	39.95	39.95	139.73	139.73	SAE			s_I-72 [6211]	GABBRO [6211]	10000 [6211]	10000 [6211]						COARSE GRAINED [6211]	PLU			F		WR [6211]	49.39	1.03		19.49		9.64			9.7	6.58	0.17		0.1	3.53	0.17
[6211]	CONVERGENT MARGIN	HONSHU ARC / NORTHEASTERN HONSHU ARC / HONSHU / MEGATA - ICHINOMEGATA MAAR	OGA PENINSULA, AKITA PREFECTURE	39.95	39.95	139.73	139.73	SAE			s_I-73 [6211]	GABBRO [6211]	10000 [6211]	10000 [6211]						COARSE GRAINED [6211]	PLU			F		WR [6211]	42.08	1.58		20.32		11.88			12.73	8.27	0.17		0.3	2.01	0.33
[4783][3185]	CONVERGENT MARGIN	HONSHU ARC / NORTHEASTERN HONSHU ARC / HONSHU / ADATARA / TETSUZAN PYROCLASTIC FALL		37.62	37.62	140.28	140.28	SAE			s_3-14 [4783]	NOT GIVEN [4783] / BASALT, CALC-ALKALINE [3185]				QUATERNARY [3185]					VOL					WR [4783]	61.69	0.73		16.03		2.89	3.74		5.83	3.2	0.11		1.98	2.68	0.15		0.78	0.57
[3185]	CONVERGENT MARGIN	HONSHU ARC / NORTHEASTERN HONSHU ARC / HONSHU / ADATARA / ADATARA SUMMIT PYROCLASTIC FALL		37.62	37.62	140.28	140.28	SAE			s_3-16 [3185]	BASALT, CALC-ALKALINE [3185]				QUATERNARY [3185]					VOL					WR [3185]	61.79	0.74		16.13		2.68	3.94		5.76	2.57	0.11		1.68	2.94	0.14		0.73	0.57
[4783][3185]	CONVERGENT MARGIN	HONSHU ARC / NORTHEASTERN HONSHU ARC / HONSHU / ADATARA / KAGOYAMA LAVA FLOW		37.62	37.62	140.28	140.28	SAE			s_3-9 [4783]	NOT GIVEN [4783] / BASALT, CALC-ALKALINE [3185]				QUATERNARY [3185]					VOL					WR [4783]	60.11	0.85		16.34		3.91	3.95		5.77	3.03	0.14		1.58	2.78	0.17		0.71	0.66
[4783][3185]	CONVERGENT MARGIN	HONSHU ARC / NORTHEASTERN HONSHU ARC / HONSHU / ADATARA / MINENOTSUJI LAVA FLOW		37.62	37.62	140.28	140.28	SAE			s_3-2 [4783]	NOT GIVEN [4783] / BASALT, CALC-ALKALINE [3185]				QUATERNARY [3185]					VOL					WR [4783]	57.12	0.97		17.84		3.56	3.68		6.06	3.77	0.14		1.05	2.43	0.19		1.42	1.47
[4783][3185]	CONVERGENT MARGIN	HONSHU ARC / NORTHEASTERN HONSHU ARC / HONSHU / ADATARA / OSYOZAN FLOW		37.62	37.62	140.28	140.28	SAE			s_3-8 [4783]	NOT GIVEN [4783] / BASALT, CALC-ALKALINE [3185]				QUATERNARY [3185]					VOL					WR [4783]	59.48	0.79		17.62		4.42	3.07		5.99	3.46	0.12		1.53	2.71	0.17		0.64	0.33
[4783][3185]	CONVERGENT MARGIN	HONSHU ARC / NORTHEASTERN HONSHU ARC / HONSHU / ADATARA / FUNAMYOJIN LAVA FLOW		37.62	37.62	140.28	140.28	SAE			s_3-6 [4783]	NOT GIVEN [4783] / BASALT, CALC-ALKALINE [3185]				QUATERNARY [3185]					VOL					WR [4783]	59.13	0.76		16.27		3.77	4		6.11	3.98	0.1		1.63	2.44	0.14		0.7	0.83
[4783][3185]	CONVERGENT MARGIN	HONSHU ARC / NORTHEASTERN HONSHU ARC / HONSHU / ADATARA / YAHAZUMORI PYROCLASTIC FALL		37.62	37.62	140.28	140.28	SAE			s_3-12 [4783]	NOT GIVEN [4783] / BASALT, CALC-ALKALINE [3185]				QUATERNARY [3185]					VOL					WR [4783]	61	0.88		16.82		4.42	2.86		5.94	2.46	0.11		1.37	2.92	0.16		0.56	0.18
[4783][3185]	CONVERGENT MARGIN	HONSHU ARC / NORTHEASTERN HONSHU ARC / HONSHU / ADATARA / NUMANOTAIRA LAVA FLOW		37.62	37.62	140.28	140.28	SAE			s_3-4 [4783]	NOT GIVEN [4783] / BASALT, CALC-ALKALINE [3185]				QUATERNARY [3185]					VOL					WR [4783]	57.72	0.95		16.56		4.72	4.24		6.65	3.56	0.13		1.14	2.56	0.21		0.74	0.59
[4783][3185]	CONVERGENT MARGIN	HONSHU ARC / NORTHEASTERN HONSHU ARC / HONSHU / ADATARA / AKADAKI FLOW		37.62	37.62	140.28	140.28	SAE			s_3-13 [4783]	NOT GIVEN [4783] / BASALT, CALC-ALKALINE [3185]				QUATERNARY [3185]					VOL					WR [4783]	61.56	0.71		16.62		4.23	2.89		6.21	3.22	0.1		1.68	2.57	0.11		0.36	0.15
[4783][3185]	CONVERGENT MARGIN	HONSHU ARC / NORTHEASTERN HONSHU ARC / HONSHU / ADATARA / SHIRAITO LAVA FLOW		37.62	37.62	140.28	140.28	SAE			s_3-10 [4783]	NOT GIVEN [4783] / BASALT, CALC-ALKALINE [3185]				QUATERNARY [3185]					VOL					WR [4783]	60.17	0.84		17.39		3.74	3.36		6.78	3.07	0.13		1.47	2.58	0.16		0.31	0.26
[4783][3185]	CONVERGENT MARGIN	HONSHU ARC / NORTHEASTERN HONSHU ARC / HONSHU / ADATARA / OHTAKI FLOW		37.62	37.62	140.28	140.28	SAE			s_3-5 [4783]	NOT GIVEN [4783] / BASALT, CALC-ALKALINE [3185]				QUATERNARY [3185]					VOL					WR [4783]	59.02	0.81		16.75		5.12	3.26		6.68	3.63	0.13		1.16	2.56	0.14		0.39	0.23
[3185]	CONVERGENT MARGIN	HONSHU ARC / NORTHEASTERN HONSHU ARC / HONSHU / ADATARA / SEISHIDAIRA LAVA FLOW		37.62	37.62	140.28	140.28	SAE			s_3-7 [3185]	BASALT, CALC-ALKALINE [3185]				QUATERNARY [3185]					VOL					WR [3185]	59.16	0.77		17.25		4.92	2.23		6.26	3.03	0.14		1.46	2.73	0.12		1.22	0.76
[3185]	CONVERGENT MARGIN	HONSHU ARC / NORTHEASTERN HONSHU ARC / HONSHU / ADATARA / KIMENZAN FLOW		37.62	37.62	140.28	140.28	SAE			s_3-15 [3185]	BASALT, CALC-ALKALINE [3185]				QUATERNARY [3185]					VOL					WR [3185]	61.97	0.67		16.14		2.34	3.59		5.47	2.66	0.1		1.97	2.7	0.14		1.18	0.88
[4357]	CONVERGENT MARGIN	HONSHU ARC / NORTHEASTERN HONSHU ARC / HONSHU / ADATARA / MINOWASAN LAVA FLOW		37.62	37.62	140.28	140.28	SAE			s_3-11 [4357]	ANDESITE, AUGITE-HYPERSTHENE [4357]				QUATERNARY [4357]					VOL					WR [4357]
[4783][3185]	CONVERGENT MARGIN	HONSHU ARC / NORTHEASTERN HONSHU ARC / HONSHU / ADATARA / ISHIMUSHIRO-GENRYU FLOW		37.62	37.62	140.28	140.28	SAE			s_2-10 [4783]	BASALT, THOLEIITIC [4783]				QUATERNARY [3185]					VOL					WR [4783]	61.74	0.99		15.73		3.43	4.64		6.2	1.85	0.1		0.79	3.51	0.27		0.26	0.12
[3185]	CONVERGENT MARGIN	HONSHU ARC / NORTHEASTERN HONSHU ARC / HONSHU / ADATARA / CHOSHIGATAKI FLOW		37.62	37.62	140.28	140.28	SAE			s_2-8 [3185]	BASALT, THOLEIITIC [3185]				QUATERNARY [3185]					VOL					WR [3185]	56.84	0.89		18.25		3.24	4.85		8.03	3	0.07		0.62	2.59	0.15		0.67	0.55
[4783][3185]	CONVERGENT MARGIN	HONSHU ARC / NORTHEASTERN HONSHU ARC / HONSHU / ADATARA / CHOSHIGATAKI FLOW		37.62	37.62	140.28	140.28	SAE			s_2-9 [4783]	BASALT, THOLEIITIC [4783]				QUATERNARY [3185]					VOL					WR [4783]	56.85	0.89		18.97		4.22	3.93		8.07	3.1	0.12		0.59	2.58	0.2		0.38	0.27
[4783][3185]	CONVERGENT MARGIN	HONSHU ARC / NORTHEASTERN HONSHU ARC / HONSHU / ADATARA / SENNYODAIRA-SHITA FLOW		37.62	37.62	140.28	140.28	SAE			s_2-5 [4783]	BASALT, THOLEIITIC [4783]				QUATERNARY [3185]					VOL					WR [4783]	54.52	0.98		18.6		4.48	5.48		8.35	3.64	0.18		0.4	2.31	0.19		0.68	0.35
[4783][3185]	CONVERGENT MARGIN	HONSHU ARC / NORTHEASTERN HONSHU ARC / HONSHU / ADATARA / SENNYODAIRA-SHITA FLOW		37.62	37.62	140.28	140.28	SAE			s_2-6 [4783]	BASALT, THOLEIITIC [4783]				QUATERNARY [3185]					VOL					WR [4783]	54.62	1.02		18.04		4.73	5.19		7.75	3.6	0.17		0.37	2.6	0.19		0.91	0.62
[4783][3185]	CONVERGENT MARGIN	HONSHU ARC / NORTHEASTERN HONSHU ARC / HONSHU / ADATARA / AKAGIDAIRA FLOW		37.62	37.62	140.28	140.28	SAE			s_2-3 [4783]	BASALT, THOLEIITIC [4783]				QUATERNARY [3185]					VOL					WR [4783]	53.94	0.96		19.19		4.35	4.9		8.74	4.36	0.14		0.34	2.57	0.18		0.28	0.12
[4783][3185]	CONVERGENT MARGIN	HONSHU ARC / NORTHEASTERN HONSHU ARC / HONSHU / ADATARA / AKAGIDAIRA FLOW		37.62	37.62	140.28	140.28	SAE			s_2-4 [4783]	BASALT, THOLEIITIC [4783]				QUATERNARY [3185]					VOL					WR [4783]	54.23	0.96		18.31		4.24	5.12		8.61	4.22	0.16		0.29	2.5	0.18		0.61	0.25
[4405]	CONVERGENT MARGIN	HONSHU ARC / CENTRAL HONSHU ARC / HONSHU / MYOKO	MYOKO VOLCANO GROUP	37	37	138	138	SAE			s_MK527L-1 [4405]	ANDESITE, BASALTIC [4405]								PORPHYRITIC [4405]	VOL					WR [4405]
[4405]	CONVERGENT MARGIN	HONSHU ARC / CENTRAL HONSHU ARC / HONSHU / YATSUGATAKE / KASUGA VOLCANIC ROCKS	FOSSA MAGNA, OLDER YATSUGATAKE	35.97	35.97	138.37	138.37	SAE			s_YT-3234 [4405]	BASALT, AUGITE-OLIVINE [4405]									VOL					WR [4405]	48.21												0.74
[4405]	CONVERGENT MARGIN	HONSHU ARC / CENTRAL HONSHU ARC / HONSHU / YATSUGATAKE / MINAMI-YOKODAKE UPPER LAVA	FOSSA MAGNA, SOUTH YATSUGATAKE	35.97	35.97	138.37	138.37	SAE			s_YT-381 [4405]	ANDESITE, OLIVINE-HYPERSTHENE-AUGITE [4405]									VOL					WR [4405]	53.77												0.81
[4405]	CONVERGENT MARGIN	HONSHU ARC / CENTRAL HONSHU ARC / HONSHU / YATSUGATAKE / CHAUSUYAMA LAVA	FOSSA MAGNA	35.97	35.97	138.37	138.37	SAE			s_YT-342 [4405]	ANDESITE, HYPERSTHENE-OLIVINE-AUGITE [4405]									VOL					WR [4405]	54.5												1.18
[4405]	CONVERGENT MARGIN	HONSHU ARC / CENTRAL HONSHU ARC / HONSHU / YATSUGATAKE / YOKODAKE BASAL LAVA	FOSSA MAGNA	35.97	35.97	138.37	138.37	SAE			s_YT-3566 [4405]	ANDESITE, HORNBLENDE-HYPERSTHENE-AUGITE [4405]									VOL					WR [4405]	57.58												1.45
[4405]	CONVERGENT MARGIN	HONSHU ARC / CENTRAL HONSHU ARC / HONSHU / YATSUGATAKE / MINENOMATSUME LAVA	FOSSA MAGNA	35.97	35.97	138.37	138.37	SAE			s_YT-3823 [4405]	ANDESITE, HYPERSTHENE-AUGITE [4405]									VOL					WR [4405]	60.72												2.02
[4405]	CONVERGENT MARGIN	HONSHU ARC / CENTRAL HONSHU ARC / HONSHU / YATSUGATAKE / INAKODAKE LAVA	FOSSA MAGNA	35.97	35.97	138.37	138.37	SAE			s_YT-1110 [4405]	DACITE, HORNBLENDE [4405]									VOL					WR [4405]	62.78												2.35
[4405]	CONVERGENT MARGIN	HONSHU ARC / CENTRAL HONSHU ARC / HONSHU / YATSUGATAKE / FUTAGOMINE LAVA	FOSSA MAGNA	35.97	35.97	138.37	138.37	SAE			s_YT-3200 [4405]	DACITE, HYPERSTHENE-AUGITE-HORNBLENDE [4405]									VOL					WR [4405]	65.11												1.91
[4405]	CONVERGENT MARGIN	HONSHU ARC / CENTRAL HONSHU ARC / HONSHU / OLDER HAKUSAN	HAKUSAN VOLCANO GROUP	36	36.5	136.5	137	SAE			s_HK-42 [4405]	ANDESITE, HYPERSTHENE-HORNBLENDE [4405]									VOL					WR [4405]	61.49												2.04
[4405]	CONVERGENT MARGIN	HONSHU ARC / CENTRAL HONSHU ARC / HONSHU / NORIKURA / EBISU LAVA	NORIKURA VOLCANIC CHAIN	35	37	136	138	SAE			s_N-157 [4405]	ANDESITE, AUGITE-HYPERSTHENE-HORNBLENDE [4405]									VOL					WR [4405]	58.56												1.99
[4405]	CONVERGENT MARGIN	HONSHU ARC / CENTRAL HONSHU ARC / HONSHU / NORIKURA / BYOBUDAKE AGGLUTINATE	NORIKURA VOLCANIC CHAIN	35	37	136	138	SAE			s_N-137 [4405]	ANDESITE, AUGITE-HORNBLENDE-HYPERSTHENE [4405]									VOL					WR [4405]	58.91												1.82
[4405]	CONVERGENT MARGIN	HONSHU ARC / CENTRAL HONSHU ARC / HONSHU / NORIKURA / YOTSUDAKE LAVA	NORIKURA VOLCANIC CHAIN	35	37	136	138	SAE			s_N-153 [4405]	ANDESITE, HORNBLENDE-AUGITE-HYPERSTHENE [4405]									VOL					WR [4405]	59												2.17
[4405]	CONVERGENT MARGIN	HONSHU ARC / CENTRAL HONSHU ARC / HONSHU / NORIKURA / EBOSHI LAVA	NORIKURA VOLCANIC CHAIN	35	37	136	138	SAE			s_N-167 [4405]	ANDESITE, HORNBLENDE-AUGITE-HYPERSTHENE [4405]									VOL					WR [4405]	59.22												2.03
[4405]	CONVERGENT MARGIN	HONSHU ARC / CENTRAL HONSHU ARC / HONSHU / NORIKURA / DAIKOKU LAVA	NORIKURA VOLCANIC CHAIN	35	37	136	138	SAE			s_N-118A [4405]	ANDESITE, HYPERSTHENE-HORNBLENDE [4405]									VOL					WR [4405]	61.51												2.32
[4405]	CONVERGENT MARGIN	HONSHU ARC / CENTRAL HONSHU ARC / HONSHU / NORIKURA / SENCHO LAVA	NORIKURA VOLCANIC CHAIN	35	37	136	138	SAE			s_N-112 [4405]	ANDESITE, AUGITE-HYPERSTHENE [4405]									VOL					WR [4405]	62.02												2.34
[4405]	CONVERGENT MARGIN	HONSHU ARC / CENTRAL HONSHU ARC / HONSHU / ONTAKE/KISO-ON-TAKE	NORIKURA VOLCANIC CHAIN, OLDER ONTAKE	35.89	35.89	137.48	137.48	SAE			s_OT-36 [4405]	ANDESITE, AUGITE-HYPERSTHENE [4405]									VOL					WR [4405]	55.52												2.01
[4405]	CONVERGENT MARGIN	HONSHU ARC / CENTRAL HONSHU ARC / HONSHU / ONTAKE/KISO-ON-TAKE	NORIKURA VOLCANIC CHAIN, OLDER ONTAKE	35.89	35.89	137.48	137.48	SAE			s_OT-24 [4405]	ANDESITE, HORNBLENDE-HYPERSTHENE-AUGITE [4405]									VOL					WR [4405]	59.02												2.54
[4405]	CONVERGENT MARGIN	HONSHU ARC / CENTRAL HONSHU ARC / HONSHU / ONTAKE/KISO-ON-TAKE	NORIKURA VOLCANIC CHAIN, OLDER ONTAKE	35.89	35.89	137.48	137.48	SAE			s_OT-9 [4405]	ANDESITE, HORNBLENDE [4405]									VOL					WR [4405]	61.23												2.59
[4405]	CONVERGENT MARGIN	HONSHU ARC / CENTRAL HONSHU ARC / HONSHU / ONTAKE/KISO-ON-TAKE	NORIKURA VOLCANIC CHAIN, OLDER ONTAKE	35.89	35.89	137.48	137.48	SAE			s_OT-40 [4405]	ANDESITE, AUGITE-HYPERSTHENE-HORNBLENDE [4405]									VOL					WR [4405]	62.79												3.13
[4405]	CONVERGENT MARGIN	HONSHU ARC / CENTRAL HONSHU ARC / HONSHU / ONTAKE/KISO-ON-TAKE	NORIKURA VOLCANIC CHAIN, YOUNGER ONTAKE	35.89	35.89	137.48	137.48	SAE			s_OT-31 [4405]	ANDESITE, HYPERSTHENE-AUGITE [4405]									VOL					WR [4405]	55.65												1.68
[4405]	CONVERGENT MARGIN	HONSHU ARC / CENTRAL HONSHU ARC / HONSHU / ONTAKE/KISO-ON-TAKE	NORIKURA VOLCANIC CHAIN, YOUNGER ONTAKE	35.89	35.89	137.48	137.48	SAE			s_OT-1(SA79103102) [4405]	ANDESITE, AUGITE-HYPERSTHENE [4405]									VOL					WR [4405]	58.05												1.73
[4405]	CONVERGENT MARGIN	HONSHU ARC / CENTRAL HONSHU ARC / HONSHU / ONTAKE/KISO-ON-TAKE	NORIKURA VOLCANIC CHAIN, YOUNGER ONTAKE	35.89	35.89	137.48	137.48	SAE			s_OT-4 [4405]	ANDESITE, OLIVINE-HYPERSTHENE-AUGITE [4405]									VOL					WR [4405]	59.55												2.34
[4748]	CONVERGENT MARGIN	HONSHU ARC / SOUTHWESTERN HONSHU ARC / HONSHU	KASAYAMA, HAGI, WESTERN PART OF SAN-IN AREA	35.4	35.7	134.5	135.2	SAE			s_1 [4748]	BASALT, QUARTZ [4748]								NEARLY APHYRIC [4748]	VOL					WR [4748]	55.9	1.56		16		0.92	6.1		7.32	4.84	0.12		1.52	3.56	0.37		0.98	0.14
[4748]	CONVERGENT MARGIN	HONSHU ARC / SOUTHWESTERN HONSHU ARC / DAIKONJIMA	NEAR MATSUE	35.49	35.49	133.18	133.18	SAE			s_3 [4748]	BASALT [4748]									VOL					WR [4748]	52.39	1.47		15.62		1.5	8.06		8.68	6.92	0.13		0.79	3.43	0.33		0.22	0.24
[3192][3182]	CONVERGENT MARGIN	HONSHU ARC / SOUTHWESTERN HONSHU ARC / HONSHU	OSAKA, SETOUCHI VOLCANIC BELT	34.7	34.7	135.5	135.5	SAE			s_NBY-11 [3192]	ANDESITE [3192]			MIDDLE [3192]	MIOCENE [3192]					VOL					WR [3192]	55.86	0.4		14.25		1.74	4.41		7.11	10.95	0.12		1.12	2.32	0.11		1.52	0.1
[3192][3182]	CONVERGENT MARGIN	HONSHU ARC / SOUTHWESTERN HONSHU ARC / SHIKOKU/SIKOKU	NORTHWEST SHIKOKU, SETOUCHI VOLCANIC BELT	34	34	133	133	SAE			s_HG-130 [3192] / s_HG130 [3182]	ANDESITE [3192]			MIDDLE [3192]	MIOCENE [3192]					VOL					WR [3192]	54.46	0.58		14.24		2.9	3.85		6.73	11.56	0.12		1.22	2.46	0.13		1.62	0.52
[3192][2326][3182][13628]	CONVERGENT MARGIN	HONSHU ARC / SOUTHWESTERN HONSHU ARC / HONSHU	TERAGA-IKE, OSAKA, SETOUCHI VOLCANIC BELT	34.5	34.5	135.5	135.5	SAE			s_TGI [3192] / s_TGI-5 [13628]	ANDESITE [3192]			MIDDLE [3192]	MIOCENE [3192]					VOL					WR [3192]	58.5	0.43		13.3		2.5	3.95		6.13	9.47	0.12		1.28	2.61	0.13		1.37	0.22
[19747]	CONVERGENT MARGIN	HONSHU ARC / SOUTHWESTERN HONSHU ARC / HONSHU	MASUDA NORTH CAULDRON	34.7122	34.7122	131.927	131.927	SAE			s_TN-50 [19747]	BASALT, OLIVINE-CLINOPYROXENE [19747]									VOL					WR [19747]	49.59	1.73		16.39				9.62	7.1	5.3	0.18		0.92	3.3	0.68
[19747]	CONVERGENT MARGIN	HONSHU ARC / SOUTHWESTERN HONSHU ARC / HONSHU	MASUDA SOUTH CAULDRON	34.6811	34.6811	131.903	131.903	SAE			s_78321-1 [19747]	ANDESITE, CLINOPYROXENE [19747]									VOL					WR [19747]	56.11	0.82		16.39				6.84	8.17	5.11	0.13		0.73	3.18	0.19
[19747]	CONVERGENT MARGIN	HONSHU ARC / SOUTHWESTERN HONSHU ARC / HONSHU	MASUDA SOUTH CAULDRON	34.6944	34.6944	131.947	131.947	SAE			s_MT-09 [19747]	BASALT, OLIVINE-CLINOPYROXENE [19747]									VOL					WR [19747]	49.55	1.06		17.96				7.43	8.72	6.2	0.14		0.63	2.69	0.29
[19747]	CONVERGENT MARGIN	HONSHU ARC / SOUTHWESTERN HONSHU ARC / HONSHU	MASUDA SOUTH CAULDRON	34.6575	34.6575	131.907	131.907	SAE			s_78504-D2 [19747]	RHYOLITE [19747]								APHYRIC [19747]	VOL					WR [19747]	73.97	0.08		14.04				1.03	1.4	0.32	0.02		4.43	2.71	0.03
[19747]	CONVERGENT MARGIN	HONSHU ARC / SOUTHWESTERN HONSHU ARC / HONSHU	SHIMOKOH CAULDRON	34.9511	34.9511	132.123	132.123	SAE			s_TG-102 [19747]	ANDESITE, CLINOPYROXENE [19747]									VOL					WR [19747]	59.2	1.22		15.91				7.2	4.85	2.45	0.14		1.78	4.25	0.25
[19747]	CONVERGENT MARGIN	HONSHU ARC / SOUTHWESTERN HONSHU ARC / HONSHU	HAMADA CAULDRON	34.8847	34.8847	132.142	132.142	SAE			s_7865-11 [19747]	BASALT, OLIVINE-CLINOPYROXENE [19747]									VOL					WR [19747]	51.22	1.14		18.09				8.48	10.01	4.73	0.18		0.25	3.13	0.39
[19747]	CONVERGENT MARGIN	HONSHU ARC / SOUTHWESTERN HONSHU ARC / HONSHU	YASAKA CAULDRON	34.7775	34.7775	132.126	132.126	SAE			s_83207-3 [19747]	BASALT, OLIVINE-CLINOPYROXENE [19747]									VOL					WR [19747]	49.72	1.11		16.51				7.97	8.11	7.33	0.15		0.88	3.04	0.23
[19747]	CONVERGENT MARGIN	HONSHU ARC / SOUTHWESTERN HONSHU ARC / HONSHU	HAZA CAULDRON	34.7911	34.7911	132.213	132.213	SAE			s_1129-06 [19747]	ANDESITE, BASALTIC, CLINOPYROXENE [19747]									VOL					WR [19747]	55.52	0.98		16.89				7.14	7.43	4.33	0.15		1.04	3.53	0.44
[19747]	CONVERGENT MARGIN	HONSHU ARC / SOUTHWESTERN HONSHU ARC / HONSHU	IMAMISAKI PENINSULA	34.4139	34.4139	131.13	131.13	SAE			s_IM-102 [19747]	BASALT, OLIVINE [19747]									VOL					WR [19747]	50.1	0.77		16.56				7.86	9.19	8.22	0.14		0.56	2.44	0.13
[19747]	CONVERGENT MARGIN	HONSHU ARC / SOUTHWESTERN HONSHU ARC / HONSHU	IMAMISAKI PENINSULA	34.4169	34.4169	131.129	131.129	SAE			s_IM-220 [19747]	BASALT, OLIVINE [19747]									VOL					WR [19747]	49.94	0.74		17.68				8.68	9.84	7.21	0.17		0.28	2.76	0.11
[19747]	CONVERGENT MARGIN	HONSHU ARC / SOUTHWESTERN HONSHU ARC / HONSHU	HAMADA CAULDRON	34.5	35	131.8	132.2	SAE			s_810509-5 [19747]	ANDESITE, BASALTIC [19747]									VOL					WR [19747]	50.25	0.63		16.73				7.53	9.52	8.12	0.14		1.51	2.95	0.15
[19747]	CONVERGENT MARGIN	HONSHU ARC / SOUTHWESTERN HONSHU ARC / HONSHU	MASUDA NORTH CAULDRON	34.5	34.8	131.5	132	SAE			s_78525-A5 [19747]	RHYOLITE, PLAGIOCLASE [19747]									VOL					WR [19747]	74.44	0.2		13.26				1.83	1.24	0.32	0.06		3.02	4.17	0.03
[19747]	CONVERGENT MARGIN	HONSHU ARC / SOUTHWESTERN HONSHU ARC / HONSHU	YASAKA CAULDRON	34.5	35	131.5	132	SAE			s_82Y12-7 [19747]	ANDESITE, BASALTIC [19747]									VOL					WR [19747]	51.44	1.16		17.02				8.04	8.34	7.25	0.16		0.96	3	0.22
[5072][3252]	CONVERGENT MARGIN	HONSHU ARC / NORTHEASTERN HONSHU ARC / HOKKAIDO / USU	LAKE SIDE OF NISHI-MARUYAMA	42.57	42.57	140.78	140.78	SAE			s_H-1 [5072]	BASALT, HYPERSTHENE-OLIVINE [5072]				QUATERNARY [5072]					VOL					WR [5072]
[5072][3252]	CONVERGENT MARGIN	HONSHU ARC / NORTHEASTERN HONSHU ARC / HOKKAIDO / USU / O-USU LAVA		42.57	42.57	140.78	140.78	SAE			s_H-8 [5072]	DACITE, HYPERSTHENE [5072]				QUATERNARY [5072]					VOL					WR [5072]	68.26	0.36		15.77		1.91	2.15	3.87	4.37	0.99	0.31		1.29	3.83	0.18	0.51
[3252]	CONVERGENT MARGIN	HONSHU ARC / NORTHEASTERN HONSHU ARC / HOKKAIDO / USU / O-USU LAVA		42.57	42.57	140.78	140.78	SAE			s_H-9 [3252]	DACITE, HYPERSTHENE [3252]				QUATERNARY [3252]					VOL					WR [3252]	71.25	0.43		13.21		3.19	1.96		3.1	0.84	0.27		1.15	4.02	0.46		0.5	0.25
[5072][3252]	CONVERGENT MARGIN	HONSHU ARC / NORTHEASTERN HONSHU ARC / HOKKAIDO / YOTEI	WESTERN SLOPE OF YOTEI	42.8	42.8	140.6	140.6	SAE			s_H-11 [5072]	ANDESITE, AUGITE-HYPERSTHENE [5072]				QUATERNARY [5072]					VOL					WR [5072]	57.84	0.82		17.48		2.72	5.74	8.19	7.77	3.14	0.12		0.99	3.13	0.2		0.11	0.05
[5072][3252]	CONVERGENT MARGIN	HONSHU ARC / NORTHEASTERN HONSHU ARC / HOKKAIDO / YOTEI	WESTERN SLOPE OF YOTEI	42.8	42.8	140.6	140.6	SAE			s_H-12 [5072]	ANDESITE, AUGITE-HYPERSTHENE [5072]				QUATERNARY [5072]					VOL					WR [5072]	57.89	0.89		18.33		2.36	5.11	7.23	7.97	2.65	0.1		1.07	3.3	0.17		0.2	0.04
[5072][3252]	CONVERGENT MARGIN	HONSHU ARC / NORTHEASTERN HONSHU ARC / HOKKAIDO / YOTEI / MINAMI-KAKO LAVA	PARASITIC CONE, SOUTHWESTERN FOOT OF YOTEI	42.8	42.8	140.6	140.6	SAE			s_H-14 [5072]	ANDESITE, HYPERSTHENE [5072]				QUATERNARY [5072]					VOL					WR [5072]	63.45	0.67		15.97		2.58	4.28	6.6	5.08	1.95	0.1		1.34	3.75	0.18		0.21	0.11
[19747]	CONVERGENT MARGIN	HONSHU ARC / SOUTHWESTERN HONSHU ARC / HONSHU	SAKUGI CAULDRON	34.8747	34.8747	132.669	132.669	SAE			s_SK-033 [19747]	ADAKITE [19747]									VOL					WR [19747]	52.43	0.77		17.85				6.67	9.09	4.81	0.14		2.11	2.87	0.37
[19747]	CONVERGENT MARGIN	HONSHU ARC / SOUTHWESTERN HONSHU ARC / HONSHU	MASUDA SOUTH CAULDRON	34.6597	34.6597	131.918	131.918	SAE			s_121403 [19747]	ADAKITE [19747]									VOL					WR [19747]	52.67	0.78		17.64				6.86	7.51	5.23	0.17		2.4	2.69	0.45
[19747]	CONVERGENT MARGIN	HONSHU ARC / SOUTHWESTERN HONSHU ARC / HONSHU	MASUDA SOUTH CAULDRON	34.6747	34.6747	131.907	131.907	SAE			s_1307 [19747]	ADAKITE [19747]									VOL					WR [19747]	53.27	0.76		17.48				6.51	8.7	4.53	0.14		2.17	3.07	0.41
[19747]	CONVERGENT MARGIN	HONSHU ARC / SOUTHWESTERN HONSHU ARC / HONSHU	MASUDA SOUTH CAULDRON	34.6703	34.6703	131.902	131.902	SAE			s_52602 [19747]	ADAKITE [19747]									VOL					WR [19747]	53.74	0.75		17.61				6.29	9.36	4.69	0.14		1.69	1.9	0.36
[19747]	CONVERGENT MARGIN	HONSHU ARC / SOUTHWESTERN HONSHU ARC / HONSHU	KIJIJAMA CAULDRON	35.3417	35.3417	133.913	133.913	SAE			s_KJ-9312 [19747]	DACITE [19747]									VOL					WR [19747]	68.33	0.65		15.05				3.1	2.56	1.06	0.09		2.9	4.13	0.25
[19747]	CONVERGENT MARGIN	HONSHU ARC / SOUTHWESTERN HONSHU ARC / HONSHU	TAMAGAWA CAULDRON	34.6006	34.6006	131.666	131.666	SAE			s_T-003 [19747]	DACITE [19747]									VOL					WR [19747]	67.81	0.59		14.35				2.83	2.18	0.82	0.1		1.81	4.99	0.19
[19747]	CONVERGENT MARGIN	HONSHU ARC / SOUTHWESTERN HONSHU ARC / HONSHU	YASAKA CAULDRON	34.7647	34.7647	132.076	132.076	SAE			s_760515-11 [19747]	GABBRO, HORNBLENDE-QUARTZ [19747]									PLU					WR [19747]	50.59	1.1		19.24				7.68	8.75	5.36	0.14		0.8	3.15	0.18
[19747]	CONVERGENT MARGIN	HONSHU ARC / SOUTHWESTERN HONSHU ARC / HONSHU	MASUDA NORTH CAULDRON	34.775	34.775	131.904	131.904	SAE			s_OK-01 [19747]	DIORITE, BIOTITE-HORNBLENDE-QUARTZ [19747]									PLU					WR [19747]	58.45	0.85		18.68				5.88	6.61	2.44	0.11		0.96	4.41	0.22
[19747]	CONVERGENT MARGIN	HONSHU ARC / SOUTHWESTERN HONSHU ARC / HONSHU	HAMADA CAULDRON	34.8086	34.8086	132.071	132.071	SAE			s_NAB-02 [19747]	DIORITE, CLINOPYROXENE-BIOTITE-QUARTZ [19747]									PLU					WR [19747]	60.54	0.74		17.38				5.51	6.7	3.11	0.12		1.66	3.43	0.13
[19747]	CONVERGENT MARGIN	HONSHU ARC / SOUTHWESTERN HONSHU ARC / HONSHU	KAWAUCHI CALDRON	34.9689	34.9689	132.468	132.468	SAE			s_KW-001 [19747]	GRANODIORITE, HORNBLENDE [19747]									PLU					WR [19747]	65.71	0.53		15.73				3.88	4.56	2.05	0.08		2.54	3.57	0.07
[19747]	CONVERGENT MARGIN	HONSHU ARC / SOUTHWESTERN HONSHU ARC / HONSHU	KAWAUCHI CALDRON	35.0044	35.0044	132.424	132.424	SAE			s_KW-004 [19747]	GRANODIORITE, BIOTITE-HORNBLENDE [19747]									PLU					WR [19747]	65.71	0.53		15.73				3.88	4.56	2.05	0.08		2.54	3.57	0.07
[19747]	CONVERGENT MARGIN	HONSHU ARC / SOUTHWESTERN HONSHU ARC / HONSHU	MASUDA NORTH CAULDRON	34.7564	34.7564	131.906	131.906	SAE			s_OK-04 [19747]	TONALITE, HORNBLENDE-BIOTITE [19747]									PLU					WR [19747]	67.05	0.56		15.34				4.24	3.6	1.21	0.05		2.06	3.54	0.09
[19747]	CONVERGENT MARGIN	HONSHU ARC / SOUTHWESTERN HONSHU ARC / HONSHU	MASUDA NORTH CAULDRON	34.7575	34.7575	131.902	131.902	SAE			s_OK-02 [19747]	GRANITE, HORNBLENDE-BIOTITE [19747]									PLU					WR [19747]	70.58	0.39		14.6				3.2	2.64	0.81	0.05		2.65	3.99	0.06
[19747]	CONVERGENT MARGIN	HONSHU ARC / SOUTHWESTERN HONSHU ARC / HONSHU	HAZA CAULDRON	34.8067	34.8067	132.216	132.216	SAE			s_HZ-015 [19747]	GRANITE, BIOTITE [19747]									VOL					WR [19747]	71.11	0.33		14.8				2.36	1.58	0.53	0.05		3.36	4.49	0.07
[19747]	CONVERGENT MARGIN	HONSHU ARC / SOUTHWESTERN HONSHU ARC / HONSHU	TAMAGAWA CAULDRON	34.6003	34.6003	131.702	131.702	SAE			s_TM-22 [19747]	GRANITE, BIOTITE [19747]									PLU					WR [19747]	73.18	0.26		14.25				1.76	1.88	0.6	0.02		2.41	4.51	0.04
[19747]	CONVERGENT MARGIN	HONSHU ARC / SOUTHWESTERN HONSHU ARC / HONSHU	TAMAGAWA CAULDRON	34.5861	34.5861	131.639	131.639	SAE			s_TM-02 [19747]	GRANITE, BIOTITE [19747]									PLU					WR [19747]	74.51	0.24		13.52				1.61	1.4	0.37	0.04		2.92	4.29	0.03
[19747]	CONVERGENT MARGIN	HONSHU ARC / SOUTHWESTERN HONSHU ARC / HONSHU	TAMAGAWA CAULDRON	34.5822	34.5822	131.731	131.731	SAE			s_TM-13 [19747]	GRANITE, BIOTITE-HORNBLENDE [19747]								PORPHYRY [19747]	PLU					WR [19747]	73.56	0.24		13.98				1.56	1.84	0.47	0.04		2.72	4.34	0.03
[19747]	CONVERGENT MARGIN	HONSHU ARC / SOUTHWESTERN HONSHU ARC / HONSHU	HAMADA CAULDRON	34.8744	34.8744	132.173	132.173	SAE			s_KUM-36 [19747]	GRANITE, BIOTITE [19747]									VOL					WR [19747]	77.21	0.16		12.92				1.02	1.02	0.34	0.04		4.31	3.28	0.02
[5072][3252]	CONVERGENT MARGIN	HONSHU ARC / NORTHEASTERN HONSHU ARC / HOKKAIDO / NISEKO / ANNUPURI LAVA	CONE NEAR THE TOP OF NISEOANNUPURI	40.88	40.88	140.65	140.65	SAE			s_H-16 [5072]	ANDESITE, HYPERSTHENE-AUGITE [5072]				QUATERNARY [5072]					VOL					WR [5072]	59.93	0.86		18.5		3.09	2.84	5.62	6.13	3.21	0.06		1.8	3.9	0.03		0.4	0.22
[5072][3252]	CONVERGENT MARGIN	HONSHU ARC / NORTHEASTERN HONSHU ARC / HOKKAIDO / NISEKO / O-IWAONUPURI LAVA	DOME NEAR THE TOP OF O-IWAONUPURI	40.88	40.88	140.65	140.65	SAE			s_H-17 [5072]	ANDESITE, HYPERSTHENE-AUGITE [5072]				QUATERNARY [5072]					VOL					WR [5072]	60.35	0.83		15.77		5.01	2.78	7.29	5.68	3.39	0.19		1.61	2.85	0.22		1.21	0.19
[3252][5072]	CONVERGENT MARGIN	HONSHU ARC / NORTHEASTERN HONSHU ARC / OSHIMA-OSHIMA / OSHIMA-OSHIMA	CENTRAL CONE, YAKEKUZURE PENINSULA	41.5	41.5	139.37	139.37	SAE			s_H-19 [3252]	BASALT, OLIVINE-AUGITE [3252]				QUATERNARY [3252]					VOL					WR [3252]	49.9	1.09		16.05		5.03	5.55		10.51	7.03	0.14		1.92	2.15	0.23		0.26	0.06
[3252][5072]	CONVERGENT MARGIN	HONSHU ARC / NORTHEASTERN HONSHU ARC / OSHIMA-OSHIMA / OSHIMA-OSHIMA / HIGASHIYAMA LAVA		41.5	41.5	139.37	139.37	SAE			s_H-21 [3252]	ANDESITE, HORNBLENDE-AUGITE-HYPERSTHENE [3252]				QUATERNARY [3252]					VOL					WR [3252]	61.72	0.37		17.71		1.12	4.33		5.19	1.83	0.1		3.28	3.21	0.2		0.83	0.16
[5072][3252]	CONVERGENT MARGIN	HONSHU ARC / NORTHEASTERN HONSHU ARC / OSHIMA-KOJIMA / OSHIMA-KOJIMA		41.37	41.37	139.82	139.82	SAE			s_H-22 [5072]	ANDESITE, HORNBLENDE-HYPERSTHENE-AUGITE [5072]				QUATERNARY [5072]					VOL					WR [5072]
[3252]	CONVERGENT MARGIN	HONSHU ARC / NORTHEASTERN HONSHU ARC / HOKKAIDO / USU	SOUTH OF NISHI-YAMA	42.57	42.57	140.78	140.78	SAE			s_H-2 [3252]	BASALT, OLIVINE-HYPERSTHENE [3252]				QUATERNARY [3252]					VOL					WR [3252]
[5072][3252]	CONVERGENT MARGIN	HONSHU ARC / NORTHEASTERN HONSHU ARC / HOKKAIDO / USU	SOUTH OF NISHI-YAMA	42.57	42.57	140.78	140.78	SAE			s_H-3 [5072]	BASALT, AUGITE-HYPERSTHENE [5072]				QUATERNARY [5072]					VOL					WR [5072]
[3252]	CONVERGENT MARGIN	HONSHU ARC / NORTHEASTERN HONSHU ARC / HOKKAIDO / USU	ROOF MOUNTAIN OF SHOWA-SHINZAN	42.57	42.57	140.78	140.78	SAE			s_H-5 [3252]	ANDESITE, PIGEONITE-HYPERSTHENE [3252]				QUATERNARY [3252]					VOL					WR [3252]
[5072][3252]	CONVERGENT MARGIN	HONSHU ARC / NORTHEASTERN HONSHU ARC / HOKKAIDO / YOTEI	SUMMIT OF YOTEI, SOUTHERN RIM OF YOUNGER CRATER	42.8	42.8	140.6	140.6	SAE			s_H-13 [5072]	ANDESITE, AUGITE-HYPERSTHENE [5072]				QUATERNARY [5072]					VOL					WR [5072]	58.23	1.01		15.98		3.6	5.76	9	7.65	3.32	0.14		1.01	2.89	0.17		0.12	0.06
[3252][5072]	CONVERGENT MARGIN	HONSHU ARC / NORTHEASTERN HONSHU ARC / OSHIMA-OSHIMA / OSHIMA-OSHIMA / NISHIYAMA LAVA	YAMASEDOMARI, SOUTHERN COAST OF OSHIMA-OSHIMA ISLAND	41.5	41.5	139.37	139.37	SAE			s_H-18 [3252]	BASALT, AUGITE-OLIVINE [3252]				QUATERNARY [3252]					VOL					WR [3252]	48.89	1.02		15		2.92	6.41		10.91	10.6	0.25		1.13	1.95	0.05		0.64	0.12
[3252][5072]	CONVERGENT MARGIN	HONSHU ARC / NORTHEASTERN HONSHU ARC / OSHIMA-OSHIMA / OSHIMA-OSHIMA / NISHIYAMA LAVA	AIDOMARI, SOUTHERN COAST OF OSHIMA-OSHIMA ISLAND	41.5	41.5	139.37	139.37	SAE			s_H-20 [3252]	ANDESITE, AUGITE-HYPERSTHENE [3252]				QUATERNARY [3252]					VOL					WR [3252]	55.56	0.61		18.28		2.46	5.11		8.57	4.05	0.19		1.8	2.62	0.22		0.62	0.13
[4869]	CONVERGENT MARGIN	HONSHU ARC / SOUTHWESTERN HONSHU ARC / KYUSHU / YUFU-TSURUMI	BEPPU-SHIMABARA GRABEN SYSTEM, BEPPU AREA, ONINOMIYAMA	33.3195	33.3195	131.406	131.406	SAE			s_BO-1 [4869]	BASALT [4869]				QUATERNARY [4869]					VOL					WR [4869]	53.12	1.83		15.19				8.67	7.59	5.86	0.15		1.55	3.9	0.5
[4869]	CONVERGENT MARGIN	HONSHU ARC / SOUTHWESTERN HONSHU ARC / KYUSHU / KUJU/KUZYU VOLCANO GROUP	BEPPU-SHIMABARA GRABEN SYSTEM, KUJU AREA, HIIJIDAKE SUMMIT	33.1112	33.1112	131.272	131.272	SAE			s_KH-1 [4869]	BASALT [4869]				QUATERNARY [4869]					VOL					WR [4869]	52.55	1.03		17.93				8.92	8.77	4.62	0.18		1.19	3.2	0.22
[4869]	CONVERGENT MARGIN	HONSHU ARC / SOUTHWESTERN HONSHU ARC / KYUSHU / KUJU/KUZYU VOLCANO GROUP	BEPPU-SHIMABARA GRABEN SYSTEM, KUJU AREA, HIIJIDAKE	33.1084	33.1084	131.275	131.275	SAE			s_KH-2 [4869]	BASALT [4869]				QUATERNARY [4869]					VOL					WR [4869]	52.65	1.06		18.25				8.98	8.57	4.38	0.18		1.26	3.13	0.24
[4869]	CONVERGENT MARGIN	HONSHU ARC / SOUTHWESTERN HONSHU ARC / KYUSHU / KUJU/KUZYU VOLCANO GROUP	BEPPU-SHIMABARA GRABEN SYSTEM, KUJU AREA, HIIJIDAKE	33.114	33.114	131.261	131.261	SAE			s_KH-3 [4869]	ANDESITE [4869]				QUATERNARY [4869]					VOL					WR [4869]	58.29	1.03		16.66				6.89	6.87	3.4	0.14		1.86	3.33	0.19
[4869]	CONVERGENT MARGIN	HONSHU ARC / SOUTHWESTERN HONSHU ARC / KYUSHU / KUJU/KUZYU VOLCANO GROUP	BEPPU-SHIMABARA GRABEN SYSTEM, KUJU AREA, HIIJIDAKE	33.1167	33.1167	131.258	131.258	SAE			s_KH-4 [4869]	ANDESITE [4869]				QUATERNARY [4869]					VOL					WR [4869]	61.54	0.72		16				5.73	5.86	2.59	0.13		2.15	3.59	0.18
[3252]	CONVERGENT MARGIN	HONSHU ARC / NORTHEASTERN HONSHU ARC / HOKKAIDO / USU	CLIFF OF SONKAI-ZAWA	42.57	42.57	140.78	140.78	SAE			s_H-4 [3252]	BASALT, AUGITE-OLIVINE [3252]				QUATERNARY [3252]					VOL					WR [3252]
[5072][3252]	CONVERGENT MARGIN	HONSHU ARC / NORTHEASTERN HONSHU ARC / HOKKAIDO / USU	WESTERN FOOT OF KONPIRAYAMA	42.57	42.57	140.78	140.78	SAE			s_H-6 [5072]	ANDESITE, AUGITE-HYPERSTHENE [5072]				QUATERNARY [5072]					VOL					WR [5072]
[3252]	CONVERGENT MARGIN	HONSHU ARC / NORTHEASTERN HONSHU ARC / HOKKAIDO / USU / SHOWA-SHINZAN LAVA	NORTHERN SIDE OF SHOWA-SHINZAN	42.57	42.57	140.78	140.78	SAE			s_H-7 [3252]	DACITE, HYPERSTHENE [3252]				QUATERNARY [3252]					VOL					WR [3252]
[4734]	CONVERGENT MARGIN	HONSHU ARC / SOUTHWESTERN HONSHU ARC / HONSHU / NIJO / HATA BASALT	NEAR OSAKA	34.7	34.7	135.6	135.6	SAE			s_N1 [4734]	ANDESITE, HYPERSTHENE [4734]			UPPER [4734]	MIOCENE [4734]				PORPHYRITIC [4734]	VOL					WR [4734]	61.5	0.81		17.52		0.77	4.7		5.31	2.74	0.13		1.88	2.22	0.2		1.96	0.37
[4734]	CONVERGENT MARGIN	HONSHU ARC / SOUTHWESTERN HONSHU ARC / HONSHU / NIJO / KASUGAYAMA LAVA	NEAR OSAKA	34.7	34.7	135.6	135.6	SAE			s_N2 [4734]	SANUKITE, ANDESINE-HYPERSTHENE [4734]			UPPER [4734]	MIOCENE [4734]				APHANITIC [4734]	VOL					WR [4734]	61.72	0.62		19.18		0.53	4.11		5.59	2.12	0.1		1.99	2.65	0.18		0.45	0.23
[3252]	CONVERGENT MARGIN	HONSHU ARC / NORTHEASTERN HONSHU ARC / HOKKAIDO / USU	USU PUMICE FALL DEPOSIT, NORTH OF SHOWA-SINZAN	42.57	42.57	140.78	140.78	SAE			s_H-10 [3252]	RHYOLITE, HYPERSTHENE [3252]				QUATERNARY [3252]					VOL					WR [3252]
[4734]	CONVERGENT MARGIN	HONSHU ARC / SOUTHWESTERN HONSHU ARC / HONSHU / NIJO / KOTOKU-LAVA	NEAR OSAKA	34.7	34.7	135.6	135.6	SAE			s_N3 [4734]	SANUKITE, ANDESINE-HYPERSTHENE [4734]			UPPER [4734]	MIOCENE [4734]				APHANITIC [4734]	VOL					WR [4734]	60.19	0.7		17.29		1.47	3.77		5.49	2	0.07		1.85	3.41	0.12		2.86	0.49
[4734]	CONVERGENT MARGIN	HONSHU ARC / SOUTHWESTERN HONSHU ARC / HONSHU / NIJO / ISHIKIRIBA-LAVA	NEAR OSAKA	34.7	34.7	135.6	135.6	SAE			s_N4 [4734]	DACITE, GARNET-BIOTITE [4734]			UPPER [4734]	MIOCENE [4734]					VOL					WR [4734]	61.67	0.6		17.92		0.41	3.91		4.77	1.52	0.11		2.42	3	0.18		0.87	0.53		1.66
[4734]	CONVERGENT MARGIN	HONSHU ARC / SOUTHWESTERN HONSHU ARC / HONSHU / NIJO / ODAKE-LAVA	NEAR OSAKA	34.7	34.7	135.6	135.6	SAE			s_N5 [4734]	DACITE, HYPERSTHENE [4734]			UPPER [4734]	MIOCENE [4734]				APHANITIC [4734]	VOL					WR [4734]	64.55	0.58		16.73		3.04	1.37		3.88	1.37	0.08		2.52	3.78	0.12		1.33	0.96
[4734]	CONVERGENT MARGIN	HONSHU ARC / SOUTHWESTERN HONSHU ARC / HONSHU / NIJO / MYOJINYAMA-LAVA	NEAR OSAKA	34.7	34.7	135.6	135.6	SAE			s_N6 [4734]	LIPARITE, HYPERSTHENE [4734]			UPPER [4734]	MIOCENE [4734]					VOL					WR [4734]	64.58	0.53		18.05		2.34	0.73		5.02	0.87	0.03		2.23	2.6	0.25		0.58	1.69
[4734]	CONVERGENT MARGIN	HONSHU ARC / SOUTHWESTERN HONSHU ARC / HONSHU / NIJO / ROKUYAJI-LAVA	NEAR OSAKA	34.7	34.7	135.6	135.6	SAE			s_N7 [4734]	NOT GIVEN [4734]			UPPER [4734]	MIOCENE [4734]					VOL					GL [4734]	70.52	0.16		13.48		1.36	0.94		2.63	0.58	0.02		2.94	2.08	0.18		4.27	0.98
[4734]	CONVERGENT MARGIN	HONSHU ARC / SOUTHWESTERN HONSHU ARC / HONSHU / MUROO	CENTRAL KINKI DISTRICT, MIE PREFECTURE, KOCHIKEI	34.5	35	136	137	SAE			s_M1 [4734]	LIPARITE, HYPERSTHENE-BIOTITE [4734]				CENOZOIC [4734]					VOL					WR [4734]	72.55	0.24		13.17		1.84	0.88		1.19	0.61	0.05		3.97	2.87	0.1		1.48	0.97
[4734]	CONVERGENT MARGIN	HONSHU ARC / SOUTHWESTERN HONSHU ARC / HONSHU	CENTRAL KINKI DISTRICT, NARA PREFECTURE, HAYAMA, TSUGENO	34	35	136.5	136.5	SAE			s_M2 [4734]	LIPARITE, HYPERSTHENE-BIOTITE [4734]				CENOZOIC [4734]					VOL					WR [4734]	71.15	0.27		13.03		1.15	1.43		1.28	0.53	0.05		4.23	3.28	0.17		2.63	0.32
[4734]	CONVERGENT MARGIN	HONSHU ARC / SOUTHWESTERN HONSHU ARC / HONSHU	CENTRAL KINKI DISTRICT, NARA PREFECTURE, MT. MIKASA	34	35	136.5	136.5	SAE			s_M3 [4734]	ANDESITE, AUGITE-HYPERSTHENE [4734]				CENOZOIC [4734]					VOL					WR [4734]	57.42	0.73		16.79		2.1	5.22		6.39	4.49	0.11		2.18	2.96	0.04		1.65	0.36
[4734]	CONVERGENT MARGIN	HONSHU ARC / SOUTHWESTERN HONSHU ARC / HONSHU	CENTRAL KINKI DISTRICT, NARA PREFECTURE, MT. SHIGI	34	35	136.5	136.5	SAE			s_S1 [4734]	BASALT, AUGITE-OLIVINE [4734]				CENOZOIC [4734]					VOL					WR [4734]	51.72	0.58		15.71		2.15	5.65		7.86	9.89	0.14		0.79	2.74	0.07		2.3	0.85
[4734]	CONVERGENT MARGIN	HONSHU ARC / SOUTHWESTERN HONSHU ARC / HONSHU	CENTRAL KINKI DISTRICT, OSAKA PREFECTURE, SHIBAYAMA, KOKUBU	34.3	35	135	136	SAE			s_S2 [4734]	ANDESITE, BASALTIC, OLIVINE-AUGITE [4734]				CENOZOIC [4734]					VOL					WR [4734]	52.4	1.01		16.94		2.23	5.55		7.69	7.65	0.15		1.15	2.45	0.16		1.06	1.05
[4734]	CONVERGENT MARGIN	HONSHU ARC / SOUTHWESTERN HONSHU ARC / HONSHU	CENTRAL KINKI DISTRICT, OSAKA PREFECTURE, SHIONOMIYA NEAR NAGANO	34.3	35	135	136	SAE			s_S3 [4734]	ANDESITE, OLIVINE-AUGITE-HYPERSTHENE [4734]				CENOZOIC [4734]					VOL					WR [4734]	57.24	0.54		15.31		1.82	4.81		5.71	7.52	0.11		1.46	2.91	0.18		1.76	0.39
[4734]	CONVERGENT MARGIN	HONSHU ARC / SOUTHWESTERN HONSHU ARC / HONSHU	CENTRAL KINKI DISTRICT, OSAKA PREFECTURE, TERAYAMA, MINAMI-KAWACHI	34.3	35	135	136	SAE			s_S4 [4734]	ANDESITE, BIOTITE-QUARTZ-HYPERSTHENE [4734]				CENOZOIC [4734]					VOL					WR [4734]	64.02	0.42		15.42		1.78	2.43		2.93	4.45	0.09		2.57	3.45	0.04		2.32	0.38
[20281]	CONVERGENT MARGIN	HONSHU ARC / CENTRAL HONSHU ARC / HONSHU / KIRIAKE BASALT	NORTHERN FOSSA MAGNA	36.78	36.78	138.63	138.63	SAE			s_KRA-1B [20281]	BASALT [20281]			EARLY [20281]	MIOCENE [20281]				APHYRIC [20281]	VOL					WR [20281]	51.16	0.82		15.28				9.05	7.74	6.03	0.19		0.03	5.24	0.13
[20281]	CONVERGENT MARGIN	HONSHU ARC / CENTRAL HONSHU ARC / HONSHU / KIRIAKE BASALT	NORTHERN FOSSA MAGNA	36.78	36.78	138.63	138.63	SAE			s_KRA-4 [20281]	BASALT [20281]			EARLY [20281]	MIOCENE [20281]				APHYRIC [20281]	VOL					WR [20281]	52.17	1.16		15.45				11.12	6.41	5.87	0.16		0.13	2.84	0.12
[20281]	CONVERGENT MARGIN	HONSHU ARC / CENTRAL HONSHU ARC / HONSHU / KIRIAKE BASALT	NORTHERN FOSSA MAGNA	36.79	36.79	138.632	138.632	SAE			s_KRA-5A [20281]	BASALT [20281]			EARLY [20281]	MIOCENE [20281]				APHYRIC [20281]	VOL					WR [20281]	50	1.16		15.75				12.17	7.16	6.32	0.27		0.28	2.98	0.11
[20281]	CONVERGENT MARGIN	HONSHU ARC / CENTRAL HONSHU ARC / HONSHU / KIRIAKE BASALT	NORTHERN FOSSA MAGNA	36.79	36.79	138.631	138.631	SAE			s_KRA-5B [20281]	BASALT [20281]			EARLY [20281]	MIOCENE [20281]				APHYRIC [20281]	VOL					WR [20281]	50.21	0.74		15.97				7.91	9.66	7.47	0.27		0.22	4.03	0.09
[20281]	CONVERGENT MARGIN	HONSHU ARC / CENTRAL HONSHU ARC / HONSHU / KIRIAKE BASALT	NORTHERN FOSSA MAGNA	36.8	36.8	138.623	138.623	SAE			s_IBM-11-302 [20281]	BASALT, OLIVINE [20281]			EARLY [20281]	MIOCENE [20281]					VOL					WR [20281]	49.43	0.86		15.97				7.94	6.28	9.7	0.33		0.15	4.65	0.14
[20281]	CONVERGENT MARGIN	HONSHU ARC / CENTRAL HONSHU ARC / HONSHU / OKURA FORMATION	NORTHERN FOSSA MAGNA	36.76	36.76	139	139	SAE			s_OKR-1A [20281]	DOLERITE, OLIVINE [20281]			EARLY [20281]	MIOCENE [20281]					VOL					WR [20281]	47.27	0.9		16.51				7.21	9.12	7.07	0.19		1.89	2.18	0.12
[20281]	CONVERGENT MARGIN	HONSHU ARC / CENTRAL HONSHU ARC / HONSHU / OKURA FORMATION	NORTHERN FOSSA MAGNA	36.76	36.76	139	139	SAE			s_OKR-1B [20281]	DOLERITE, OLIVINE [20281]			EARLY [20281]	MIOCENE [20281]					VOL					WR [20281]	52.91	1.06		17.4				6.46	5.56	5.12	0.12		1.5	5.88	0.17
[20281]	CONVERGENT MARGIN	HONSHU ARC / CENTRAL HONSHU ARC / HONSHU / OKURA FORMATION	NORTHERN FOSSA MAGNA	36.8	36.8	139.037	139.037	SAE			s_OKR-2A [20281]	BASALT, OLIVINE [20281]			EARLY [20281]	MIOCENE [20281]					VOL					WR [20281]	48.86	0.98		17.27				6.54	6.95	6.94	0.11		1.01	4.78	0.18
[20281]	CONVERGENT MARGIN	HONSHU ARC / CENTRAL HONSHU ARC / HONSHU / OKURA FORMATION	NORTHERN FOSSA MAGNA	36.8	36.8	139.037	139.037	SAE			s_OKR-2B [20281]	ANDESITE, BASALTIC, OLIVINE [20281]			EARLY [20281]	MIOCENE [20281]					VOL					WR [20281]	54.17	0.92		16.36				6.29	7.89	5.54	0.2		1.05	3.51	0.18
[20281]	CONVERGENT MARGIN	HONSHU ARC / CENTRAL HONSHU ARC / HONSHU / OKURA FORMATION	NORTHERN FOSSA MAGNA	36.81	36.81	139.035	139.035	SAE			s_OKR-3 [20281]	ANDESITE, BASALTIC, OLIVINE [20281]			EARLY [20281]	MIOCENE [20281]					VOL					WR [20281]	54.99	1.09		18.84				7.69	5.85	5.01	0.08		1.22	4.24	0.14
[20281]	CONVERGENT MARGIN	HONSHU ARC / CENTRAL HONSHU ARC / HONSHU / OKURA FORMATION	NORTHERN FOSSA MAGNA	36.76	36.76	139.001	139.001	SAE			s_OKR-5 [20281]	DOLERITE, OLIVINE [20281]			EARLY [20281]	MIOCENE [20281]					VOL					WR [20281]	48.16	0.87		16.48				7.66	6.16	8.58	0.15		0.53	4.77	0.11
[20281]	CONVERGENT MARGIN	HONSHU ARC / CENTRAL HONSHU ARC / HONSHU / OKURA FORMATION	NORTHERN FOSSA MAGNA	36.76	36.76	139.001	139.001	SAE			s_OKR-D [20281]	BASALT, CLINOPYROXENE-OLIVINE [20281]			EARLY [20281]	MIOCENE [20281]					VOL					WR [20281]	48.22	1.76		16.79				9.83	5.08	8.22	0.19		1.77	3.81	0.27
[20281]	CONVERGENT MARGIN	HONSHU ARC / CENTRAL HONSHU ARC / HONSHU / MATSUKAWA FORMATION	NORTHERN FOSSA MAGNA	36.92	36.92	138.836	138.836	SAE			s_MTK-1A [20281]	BASALT, OLIVINE [20281]			EARLY [20281]	MIOCENE [20281]					VOL					WR [20281]	50.77	1		16.03				9.13	4.12	7.38	0.21		0.64	5.87	0.13
[20281]	CONVERGENT MARGIN	HONSHU ARC / CENTRAL HONSHU ARC / HONSHU / MATSUKAWA FORMATION	NORTHERN FOSSA MAGNA	37.31	37.31	139.021	139.021	SAE			s_MTK-2 [20281]	BASALT, OLIVINE [20281]			EARLY [20281]	MIOCENE [20281]					VOL					WR [20281]	47.32	1.26		17.31				7.91	6.25	7.29	0.15		1.78	3.97	0.21
[20281]	CONVERGENT MARGIN	HONSHU ARC / NORTHEASTERN HONSHU ARC / SADO-SHIMA / SANZE FORMATION	SADO ISLAND	37.83	37.83	138.344	138.344	SAE			s_SNZ-A [20281]	ANDESITE, 2-PYROXENE [20281]			EARLY [20281]	MIOCENE [20281]					VOL					WR [20281]	57.85	1.02		16.84				6.81	6.19	0.97	0.14		1.26	3.8	0.2
[20281]	CONVERGENT MARGIN	HONSHU ARC / NORTHEASTERN HONSHU ARC / SADO-SHIMA / SANZE FORMATION	SADO ISLAND	37.87	37.87	138.339	138.339	SAE			s_SNZ-C1 [20281]	ANDESITE, 2-PYROXENE-HORNBLENDE [20281]			EARLY [20281]	MIOCENE [20281]					VOL					WR [20281]	58.74	0.82		16.8				6.43	5.64	2.59	0.08		2.39	3.28	0.21
[20281]	CONVERGENT MARGIN	HONSHU ARC / NORTHEASTERN HONSHU ARC / SADO-SHIMA / MASARAGAWA FORMATION	SADO ISLAND	38.25	38.25	138.405	138.405	SAE			s_MSG-C1 [20281]	ANDESITE, BASALTIC, OLIVINE [20281]			EARLY [20281]	MIOCENE [20281]					VOL					WR [20281]	53.89	1.71		16.91				8.14	7.37	3.62	0.15		1.45	3.67	0.65
[20281]	CONVERGENT MARGIN	HONSHU ARC / NORTHEASTERN HONSHU ARC / SADO-SHIMA / MASARAGAWA FORMATION	SADO ISLAND	38.24	38.24	138.392	138.392	SAE			s_MSG-D1 [20281]	BASALT, OLIVINE [20281]			EARLY [20281]	MIOCENE [20281]					VOL					WR [20281]	51.95	1.87		16.61				9.09	7.66	4.35	0.18		1.25	3.58	0.66
[20281]	CONVERGENT MARGIN	HONSHU ARC / NORTHEASTERN HONSHU ARC / SADO-SHIMA / MASARAGAWA FORMATION	SADO ISLAND	38.04	38.04	138.235	138.235	SAE			s_MSG-F [20281]	BASALT, OLIVINE [20281]			EARLY [20281]	MIOCENE [20281]					VOL					WR [20281]	52.45	1.24		18.32				7.61	8.27	4.07	0.16		1.15	3.67	0.28
[20281]	CONVERGENT MARGIN	HONSHU ARC / NORTHEASTERN HONSHU ARC / SADO-SHIMA / ONOGAME DOLERITE	SADO ISLAND	38.32	38.32	138.461	138.461	SAE			s_ONG-A [20281]	DOLERITE, 2-PYROXENE [20281]			EARLY [20281]	MIOCENE [20281]					VOL					WR [20281]	58.03	1.25		15.92				6.89	5.66	3.49	0.14		1.87	3.73	0.43
[20281]	CONVERGENT MARGIN	HONSHU ARC / NORTHEASTERN HONSHU ARC / SADO-SHIMA / ONOGAME DOLERITE	SADO ISLAND	38.32	38.32	138.463	138.463	SAE			s_ONG-E [20281]	DOLERITE, 2-PYROXENE [20281]			EARLY [20281]	MIOCENE [20281]					VOL					WR [20281]	57.58	1.22		16.11				6.96	5.31	3.48	0.12		1.91	3.74	0.44
[20281]	CONVERGENT MARGIN	HONSHU ARC / NORTHEASTERN HONSHU ARC / SADO-SHIMA / ONOGAME DOLERITE	SADO ISLAND	38.33	38.33	138.484	138.484	SAE			s_FTG-1A [20281]	DOLERITE, 2-PYROXENE [20281]			EARLY [20281]	MIOCENE [20281]					VOL					WR [20281]	52.86	1.34		15.83				7.84	5.96	3.78	0.15		1.8	3.45	0.48
[20281]	CONVERGENT MARGIN	HONSHU ARC / NORTHEASTERN HONSHU ARC / SADO-SHIMA / ONOGAME DOLERITE	SADO ISLAND	38.33	38.33	138.484	138.484	SAE			s_FTG-1C [20281]	DOLERITE, 2-PYROXENE [20281]			EARLY [20281]	MIOCENE [20281]					VOL					WR [20281]	53.02	1.33		15.77				7.86	6.26	3.71	0.18		1.63	3.4	0.47
[20281]	CONVERGENT MARGIN	HONSHU ARC / CENTRAL HONSHU ARC / HONSHU / KAMIWAZUMI FORMATION	NOTO PENINSULA	37.35	37.35	137.1	137.1	SAE			s_KMW-A1 [20281]	BASALT, CLINOPYROXENE-OLIVINE [20281]			EARLY [20281]	MIOCENE [20281]					VOL					WR [20281]	51.54	1.35		17.58				8.35	9.24	5.57	0.08		0.6	3.33	0.32
[20281]	CONVERGENT MARGIN	HONSHU ARC / CENTRAL HONSHU ARC / HONSHU / KAMIWAZUMI FORMATION	NOTO PENINSULA	37.35	37.35	137.1	137.1	SAE			s_KMW-A2 [20281]	BASALT, CLINOPYROXENE-OLIVINE [20281]			EARLY [20281]	MIOCENE [20281]					VOL					WR [20281]	51.34	1.35		17.5				8.67	9.17	5.74	0.12		0.6	3.28	0.33
[20281]	CONVERGENT MARGIN	HONSHU ARC / CENTRAL HONSHU ARC / HONSHU / KAMIWAZUMI FORMATION	NOTO PENINSULA	37.35	37.35	137.1	137.1	SAE			s_KMW-B3 [20281]	ANDESITE, CLINOPYROXENE-OLIVINE [20281]			EARLY [20281]	MIOCENE [20281]					VOL					WR [20281]	55.11	1.32		16.96				6.38	7.91	5.42	0.1		1.35	3.39	0.25
[20281]	CONVERGENT MARGIN	HONSHU ARC / CENTRAL HONSHU ARC / HONSHU / KAMIWAZUMI FORMATION	NOTO PENINSULA	37.34	37.34	137.081	137.081	SAE			s_KMW-C [20281]	ANDESITE, 2-PYROXENE [20281]			EARLY [20281]	MIOCENE [20281]					VOL					WR [20281]	60.78	0.99		17.54				4.61	5.43	2.12	0.07		2.31	4.09	0.22
[20281]	CONVERGENT MARGIN	HONSHU ARC / CENTRAL HONSHU ARC / HONSHU / MATSUNAGI FORMATION	NOTO PENINSULA	37.51	37.51	137.345	137.345	SAE			s_SZU-A1 [20281]	ANDESITE, BASALTIC, OLIVINE [20281]			EARLY [20281]	MIOCENE [20281]					VOL					WR [20281]	53.42	1.64		19.14				6.42	6.62	3.17	0.48		2.24	4.26	0.56
[20281]	CONVERGENT MARGIN	HONSHU ARC / CENTRAL HONSHU ARC / HONSHU / MATSUNAGI FORMATION	NOTO PENINSULA	37.51	37.51	137.345	137.345	SAE			s_SZU-A3 [20281]	ANDESITE, BASALTIC, OLIVINE [20281]			EARLY [20281]	MIOCENE [20281]					VOL					WR [20281]	53.45	1.61		18.82				6.68	6.44	3.22	0.39		2.15	4.4	0.56
[20281]	CONVERGENT MARGIN	HONSHU ARC / CENTRAL HONSHU ARC / HONSHU / BESSHODAKE ANDESITE	NOTO PENINSULA	37.01	37.01	136.744	136.744	SAE			s_SKA-A2 [20281]	ANDESITE, 2-PYROXENE [20281]			EARLY [20281]	MIOCENE [20281]					VOL					WR [20281]	56.26	0.86		17.47				6.92	7.28	4.21	0.13		1.44	3.32	0.19
[20281]	CONVERGENT MARGIN	HONSHU ARC / NORTHEASTERN HONSHU ARC / ATSUMI FORMATION	NE HONSHU	38.73	38.73	139.683	139.683	SAE			s_ATMV-1 [20281]	BASALT [20281]			EARLY [20281]	MIOCENE [20281]				APHYRIC [20281]	VOL					WR [20281]	52.02	0.88		16.45				9.3	7.47	4.21	0.2		0.97	3.09	0.12
[20281]	CONVERGENT MARGIN	HONSHU ARC / NORTHEASTERN HONSHU ARC / ATSUMI FORMATION	NE HONSHU	38.66	38.66	139.637	139.637	SAE			s_ATMV-4B [20281]	BASALT, OLIVINE [20281]			EARLY [20281]	MIOCENE [20281]					VOL					WR [20281]	49.54	1.23		21.27				6.57	7.52	3.3	0.06		1.13	3.59	0.26
[20281]	CONVERGENT MARGIN	HONSHU ARC / NORTHEASTERN HONSHU ARC / WASADA FORMATION	NE HONSHU	38.29	38.29	139.311	139.311	SAE			s_GTG-1B [20281]	BASALT, CLINOPYROXENE-OLIVINE [20281]			EARLY [20281]	MIOCENE [20281]					VOL					WR [20281]	47.85	1.25		16.34				9.52	8.63	6.87	0.14		0.79	3.09	0.22
[20281]	CONVERGENT MARGIN	HONSHU ARC / NORTHEASTERN HONSHU ARC / SADO-SHIMA / OGI BASALT	SADO ISLAND	37.82	37.82	138.216	138.216	SAE			s_OGI-D [20281]	BASALT, CLINOPYROXENE-OLIVINE [20281]			MIDDLE [20281]	MIOCENE [20281]					VOL					WR [20281]	49.32	0.69		16.72				6.6	13.86	6.37	0.12		0.83	2.04	0.16
[20281]	CONVERGENT MARGIN	HONSHU ARC / NORTHEASTERN HONSHU ARC / SADO-SHIMA / OGI BASALT	SADO ISLAND	37.83	37.83	138.207	138.207	SAE			s_OGI-E1 [20281]	BASALT, PICRITIC [20281]			MIDDLE [20281]	MIOCENE [20281]					VOL					WR [20281]	43.92	0.5		7.75				9.73	4.93	28.41	0.16		0.2	0.71	0.1
[20281]	CONVERGENT MARGIN	HONSHU ARC / NORTHEASTERN HONSHU ARC / SADO-SHIMA / OGI BASALT	SADO ISLAND	37.81	37.81	138.276	138.276	SAE			s_OGI-F [20281]	BASALT, CLINOPYROXENE-OLIVINE [20281]			MIDDLE [20281]	MIOCENE [20281]					VOL					WR [20281]	51.25	0.91		15.79				7.7	10.09	3.07	0.13		0.83	2.3	0.22
[20281]	CONVERGENT MARGIN	HONSHU ARC / NORTHEASTERN HONSHU ARC / SADO-SHIMA / OGI BASALT	SADO ISLAND	37.84	37.84	138.256	138.256	SAE			s_OGI-G [20281]	BASALT, OLIVINE [20281]			MIDDLE [20281]	MIOCENE [20281]					VOL					WR [20281]	50.46	0.99		18.18				4.22	12.14	1.56	0.28		2.81	2.73	0.29
[20281]	CONVERGENT MARGIN	HONSHU ARC / NORTHEASTERN HONSHU ARC / SADO-SHIMA / KITAKOURA DOLERITE	SADO ISLAND	38.28	38.28	138.508	138.508	SAE			s_KKU-A [20281]	DOLERITE, CLINOPYROXENE-OLIVINE [20281]			MIDDLE [20281]	MIOCENE [20281]					VOL					WR [20281]	47.41	1.16		18.66				7.97	10.16	8.43	0.14		0.23	3.13	0.13
[20281]	CONVERGENT MARGIN	HONSHU ARC / NORTHEASTERN HONSHU ARC / SADO-SHIMA / KITAKOURA DOLERITE	SADO ISLAND	38.28	38.28	138.508	138.508	SAE			s_KKU-1A [20281]	DOLERITE, 2-PYROXENE-OLIVINE [20281]			MIDDLE [20281]	MIOCENE [20281]					VOL					WR [20281]	44.05	1.13		18.64				8.89	9.71	7.99	0.15		0.38	3.11	0.13
[20281]	CONVERGENT MARGIN	HONSHU ARC / NORTHEASTERN HONSHU ARC / SADO-SHIMA / KITAKOURA DOLERITE	SADO ISLAND	38.28	38.28	138.508	138.508	SAE			s_KKU-1B [20281]	DOLERITE, 2-PYROXENE-OLIVINE [20281]			MIDDLE [20281]	MIOCENE [20281]					VOL					WR [20281]	44.1	1.16		17.82				9.18	9.8	8.82	0.15		0.32	2.7	0.13
[20281]	CONVERGENT MARGIN	HONSHU ARC / NORTHEASTERN HONSHU ARC / SADO-SHIMA / SHORENJI DOLERITE	SADO ISLAND	38.63	38.63	139.726	139.726	SAE			s_NNT-2A [20281]	BASALT, OLIVINE [20281]			MIDDLE [20281]	MIOCENE [20281]					VOL					WR [20281]	45.96	1.06		16.67				6.6	12.47	6.54	0.23		1.72	2.03	0.44
[20281]	CONVERGENT MARGIN	HONSHU ARC / NORTHEASTERN HONSHU ARC / AOSAWA FORMATION	NE HONSHU	39	39	140.053	140.053	SAE			s_AOS-1B [20281]	DOLERITE, OLIVINE-CLINOPYROXENE [20281]			MIDDLE [20281]	MIOCENE [20281]					VOL					WR [20281]	46.03	1.16		17.35				9.37	9.18	7.7	0.13		0.44	2.58	0.17
[20281]	CONVERGENT MARGIN	HONSHU ARC / NORTHEASTERN HONSHU ARC / AOSAWA FORMATION	NE HONSHU	39	39	140.053	140.053	SAE			s_AOS-1C [20281]	BASALT, 2-PYROXENE [20281]			MIDDLE [20281]	MIOCENE [20281]					VOL					WR [20281]	50.12	0.99		17.2				9.44	7.82	3.88	0.19		1.56	3.44	0.29
[20281]	CONVERGENT MARGIN	HONSHU ARC / CENTRAL HONSHU ARC / HONSHU / KETTO FORMATION	NORTHERN FOSSA MAGNA	36.49	36.49	138.371	138.371	SAE			s_KTO-3 [20281]	NOT GIVEN [20281]			LATE [20281]	MIOCENE-PLIOCENE [20281]					VOL					WR [20281]	50.66	0.86		17.34				9.62	10.17	4.95	0.15		1.22	2.26	0.21
[20281]	CONVERGENT MARGIN	HONSHU ARC / CENTRAL HONSHU ARC / HONSHU / KETTO FORMATION	NORTHERN FOSSA MAGNA	36.49	36.49	138.371	138.371	SAE			s_KTO-5 [20281]	ANDESITE [20281]			LATE [20281]	MIOCENE-PLIOCENE [20281]					VOL					WR [20281]	55.24	0.65		15.78				8.45	7.7	4.66	0.17		0.21	2.47	0.11
[20281]	CONVERGENT MARGIN	HONSHU ARC / CENTRAL HONSHU ARC / HONSHU / KETTO FORMATION	NORTHERN FOSSA MAGNA	36.49	36.49	138.371	138.371	SAE			s_KTO-6 [20281]	ANDESITE [20281]			LATE [20281]	MIOCENE-PLIOCENE [20281]					VOL					WR [20281]	54.1	0.67		16.26				8.76	7.89	4.71	0.16		0.21	2.49	0.11
[20281]	CONVERGENT MARGIN	HONSHU ARC / CENTRAL HONSHU ARC / HONSHU / NISHITAJIRI FORMATION	NORTHERN FOSSA MAGNA	36.59	36.59	138.442	138.442	SAE			s_NTJ-1 [20281]	ANDESITE, 2-PYROXENE [20281]			LATE [20281]	MIOCENE-PLIOCENE [20281]					VOL					WR [20281]	52.71	0.83		17.59				10.63	9.37	3.69	0.19		0.6	2.49	0.16
[20281]	CONVERGENT MARGIN	HONSHU ARC / CENTRAL HONSHU ARC / HONSHU	NORTHERN FOSSA MAGNA	37.31	37.31	138.967	138.967	SAE			s_OJ-1 [20281]	ANDESITE, HORNBLENDE [20281]			LATE [20281]	MIOCENE-PLIOCENE [20281]					VOL					WR [20281]	54.06	0.85		17.25				7.61	7.54	3.81	0.2		1.32	3.18	0.21
[20281]	CONVERGENT MARGIN	HONSHU ARC / CENTRAL HONSHU ARC / HONSHU / YONEYAMA FORMATION	NORTHERN FOSSA MAGNA	37.13	37.13	138.301	138.301	SAE			s_YNY-1 [20281]	ANDESITE, 2-PYROXENE-HORNBLENDE [20281]			LATE [20281]	MIOCENE-PLIOCENE [20281]					VOL					WR [20281]	54.91	0.72		23				7.6	2.06	2.31	0.17		2.61	1.86	0.33
[20281]	CONVERGENT MARGIN	HONSHU ARC / CENTRAL HONSHU ARC / HONSHU / YONEYAMA FORMATION	NORTHERN FOSSA MAGNA	37.13	37.13	138.301	138.301	SAE			s_YNY-2 [20281]	BASALT, OLIVINE-2-PYROXENE [20281]			LATE [20281]	MIOCENE-PLIOCENE [20281]					VOL					WR [20281]	47.48	1.01		18.59				10.74	10.84	5.84	0.16		1.28	1.83	0.25
[20281]	CONVERGENT MARGIN	HONSHU ARC / CENTRAL HONSHU ARC / HONSHU / YONEYAMA FORMATION	NORTHERN FOSSA MAGNA	37.13	37.13	138.301	138.301	SAE			s_YNY-3 [20281]	BASALT, 2-PYROXENE-OLIVINE [20281]			LATE [20281]	MIOCENE-PLIOCENE [20281]					VOL					WR [20281]	44.99	1.21		25.17				11.45	5.78	4.41	0.19		1.36	1.42	0.44
[20281]	CONVERGENT MARGIN	HONSHU ARC / CENTRAL HONSHU ARC / HONSHU / YONEYAMA FORMATION	NORTHERN FOSSA MAGNA	37.17	37.17	138.286	138.286	SAE			s_YNY-19A [20281]	BASALT, 2-PYROXENE-OLIVINE [20281]			LATE [20281]	MIOCENE-PLIOCENE [20281]					VOL					WR [20281]	47.22	1.34		22.58				10.79	7.7	4.51	0.19		1.05	1.87	0.28
[20281]	CONVERGENT MARGIN	HONSHU ARC / CENTRAL HONSHU ARC / HONSHU / YONEYAMA FORMATION	NORTHERN FOSSA MAGNA	37.17	37.17	138.286	138.286	SAE			s_YNY-19B [20281]	BASALT, 2-PYROXENE-OLIVINE [20281]			LATE [20281]	MIOCENE-PLIOCENE [20281]					VOL					WR [20281]	49.77	1.06		18.86				9.83	10.32	5.21	0.16		1.3	2.42	0.28
[20281]	CONVERGENT MARGIN	HONSHU ARC / CENTRAL HONSHU ARC / HONSHU / YONEYAMA FORMATION	NORTHERN FOSSA MAGNA	37.21	37.21	138.292	138.292	SAE			s_YNY-25 [20281]	BASALT, 2-PYROXENE-OLIVINE [20281]			LATE [20281]	MIOCENE-PLIOCENE [20281]					VOL					WR [20281]	52.22	0.89		17.98				8.97	10.46	4.54	0.2		1.54	2.22	0.26
[20281]	CONVERGENT MARGIN	HONSHU ARC / CENTRAL HONSHU ARC / HONSHU / KUROHIME	NORTHERN FOSSA MAGNA	37.13	37.13	138.354	138.354	SAE			s_KRH-3 [20281]	BASALT, 2-PYROXENE-OLIVINE [20281]			LATE [20281]	MIOCENE-PLIOCENE [20281]					VOL					WR [20281]	49.98	0.8		19.18				9.64	9.91	4.51	0.18		1.58	2.34	0.27
[20281]	CONVERGENT MARGIN	HONSHU ARC / CENTRAL HONSHU ARC / HONSHU / HACHIKOKUSAN FORMATION	NORTHERN FOSSA MAGNA	37.18	37.18	138.384	138.384	SAE			s_HKS-1 [20281]	ANDESITE, 2-PYROXENE-HORNBLENDE [20281]			LATE [20281]	MIOCENE-PLIOCENE [20281]					VOL					WR [20281]	60.02	0.57		17.36				6.1	6.87	2.7	0.19		2.32	2.97	0.25
[4736]	CONVERGENT MARGIN	HONSHU ARC / SOUTHWESTERN HONSHU ARC / KYUSHU	MATSUBARA, S OF HITA CITY, OITA PREFECTURE	33.3	33.3	131	131	SAE			s_2A [4736]	QUARTZITE [4736]				NEOGENE [4736]					MET					WR [4736]	98.14	0				0.72			0.04	0.01			0	0	0		0.49	0.66
[4736]	CONVERGENT MARGIN	HONSHU ARC / SOUTHWESTERN HONSHU ARC / KYUSHU	MATSUBARA, S OF HITA CITY, OITA PREFECTURE	33.3	33.3	131	131	SAE			s_2B1 [4736]	ANDESITE, 2-PYROXENE [4736]				NEOGENE [4736]					VOL					WR [4736]	57.04	0.71		18.16		3.3	3.71		7.61	2.85	0.1		1.98	3.31	0.3		0.51	0.63
[4736]	CONVERGENT MARGIN	HONSHU ARC / SOUTHWESTERN HONSHU ARC / KYUSHU	MATSUBARA, S OF HITA CITY, OITA PREFECTURE	33.3	33.3	131	131	SAE			s_2B2 [4736]	ANDESITE, 2-PYROXENE [4736]				NEOGENE [4736]					VOL					WR [4736]	56.77	0.71		18.31		3.28	3.75		7.79	2.89	0.1		1.86	3.09	0.27		0.55	0.76
[4736]	CONVERGENT MARGIN	HONSHU ARC / SOUTHWESTERN HONSHU ARC / KYUSHU	MATSUBARA, S OF HITA CITY, OITA PREFECTURE	33.3	33.3	131	131	SAE			s_2C [4736]	ANDESITE, 2-PYROXENE [4736]				NEOGENE [4736]					VOL					WR [4736]	56.02	0.79		18.4		2.81	4.32		8.02	3.2	0.12		1.94	2.59	0.23		0.77	0.86
[4736]	CONVERGENT MARGIN	HONSHU ARC / SOUTHWESTERN HONSHU ARC / KYUSHU	MATSUBARA, S OF HITA CITY, OITA PREFECTURE	33.3	33.3	131	131	SAE			s_3A [4736]	SCHIST [4736]				NEOGENE [4736]					MET					WR [4736]	54.69	1.17		15.72		4.53	7.33		5.68	3.87	0.14		1.59	3.11	0.32		1.31	0.56
[4736]	CONVERGENT MARGIN	HONSHU ARC / SOUTHWESTERN HONSHU ARC / KYUSHU	MATSUBARA, S OF HITA CITY, OITA PREFECTURE	33.3	33.3	131	131	SAE			s_3B [4736]	ANDESITE, 2-PYROXENE [4736]				NEOGENE [4736]					VOL					WR [4736]	56.33	0.78		18.18		3.57	3.71		7.74	2.99	0.09		1.82	3.06	0.26		0.66	0.74
[4736]	CONVERGENT MARGIN	HONSHU ARC / SOUTHWESTERN HONSHU ARC / KYUSHU	MATSUBARA, S OF HITA CITY, OITA PREFECTURE	33.3	33.3	131	131	SAE			s_20A [4736]	DIORITE, HORNBLENDE [4736]				NEOGENE [4736]					PLU					WR [4736]	61.46	0.54		16		2.39	3.62		5.1	3	0.13		2.17	3.6	0.36		0.54	0.69
[4736]	CONVERGENT MARGIN	HONSHU ARC / SOUTHWESTERN HONSHU ARC / KYUSHU	MATSUBARA, S OF HITA CITY, OITA PREFECTURE	33.3	33.3	131	131	SAE			s_20B [4736]	ANDESITE, 2-PYROXENE [4736]				NEOGENE [4736]					VOL					WR [4736]	56.22	0.78		18.18		3.32	3.85		7.79	3.07	0.12		1.84	3.27	0.27		0.57	0.89
[4736]	CONVERGENT MARGIN	HONSHU ARC / SOUTHWESTERN HONSHU ARC / KYUSHU	MATSUBARA, S OF HITA CITY, OITA PREFECTURE	33.3	33.3	131	131	SAE			s_24B [4736]	ANDESITE, 2-PYROXENE [4736]				NEOGENE [4736]					VOL					WR [4736]	56.78	0.77		18.2		3.47	3.73		7.71	2.93	0.1		1.89	3.16	0.26		0.53	0.73
[4736]	CONVERGENT MARGIN	HONSHU ARC / SOUTHWESTERN HONSHU ARC / KYUSHU	MATSUBARA, S OF HITA CITY, OITA PREFECTURE	33.3	33.3	131	131	SAE			s_24C [4736]	ANDESITE, 2-PYROXENE [4736]				NEOGENE [4736]					VOL					WR [4736]	55.93	0.8		18.38		2.84	4.29		8	3.21	0.12		1.94	2.62	0.23		0.72	0.85
[4736]	CONVERGENT MARGIN	HONSHU ARC / SOUTHWESTERN HONSHU ARC / KYUSHU	MATSUBARA, S OF HITA CITY, OITA PREFECTURE	33.3	33.3	131	131	SAE			s_40B [4736]	ANDESITE, 2-PYROXENE [4736]				NEOGENE [4736]					VOL					WR [4736]	57.51	0.77		18.21		3.36	3.57		7.59	2.86	0.09		1.97	3.24	0.25		0.36	0.62
[4736]	CONVERGENT MARGIN	HONSHU ARC / SOUTHWESTERN HONSHU ARC / KYUSHU	MATSUBARA, S OF HITA CITY, OITA PREFECTURE	33.3	33.3	131	131	SAE			s_40C [4736]	ANDESITE, 2-PYROXENE [4736]				NEOGENE [4736]					VOL					WR [4736]	55.91	0.81		18.37		2.86	4.29		8	3.21	0.11		1.96	2.57	0.22		0.84	0.99
[4736]	CONVERGENT MARGIN	HONSHU ARC / SOUTHWESTERN HONSHU ARC / KYUSHU	MATSUBARA, S OF HITA CITY, OITA PREFECTURE	33.3	33.3	131	131	SAE			s_14A [4736]	GABBRO [4736]				NEOGENE [4736]					PLU					WR [4736]	52.62	0.78		17.21		2.75	6.34		8.69	4.13	0.09		1.63	4.13	0.31		0.66	0.52
[4736]	CONVERGENT MARGIN	HONSHU ARC / SOUTHWESTERN HONSHU ARC / KYUSHU	MATSUBARA, S OF HITA CITY, OITA PREFECTURE	33.3	33.3	131	131	SAE			s_19A [4736]	DIABASE, HORNBLENDE [4736]				NEOGENE [4736]					PLU					WR [4736]	55.2	0.42		16.61		2.81	4.07		8.28	4.8	0.07		1.85	4.39	0.34		0.74	0.59
[4736]	CONVERGENT MARGIN	HONSHU ARC / SOUTHWESTERN HONSHU ARC / KYUSHU	MATSUBARA, S OF HITA CITY, OITA PREFECTURE	33.3	33.3	131	131	SAE			s_30A [4736]	DIABASE, HORNBLENDE [4736]				NEOGENE [4736]					PLU					WR [4736]	54.66	0.86		15.88		3.92	6.91		7.01	4.65	0.15		1.27	3.24	0.29		1	0.62
[3658]	CONVERGENT MARGIN	HONSHU ARC / SOUTHWESTERN HONSHU ARC / HONSHU	CHUGOKU DISTRICT, SASABATAKE	34	36	132	136	SAE			s_TK-3 [3658]	BASALT, ALKALINE [3658]				CENOZOIC [3658]					VOL			F		WR [3658]	50.2	1.15		16.47		7.78			8.93	8.87	0.11		1.6	3.64	0.53
[3658]	CONVERGENT MARGIN	HONSHU ARC / SOUTHWESTERN HONSHU ARC / HONSHU	CHUGOKU DISTRICT, HANADA	34	36	132	136	SAE			s_TK-15 [3658]	BASALT, ALKALINE [3658]				CENOZOIC [3658]					VOL			F		WR [3658]	46.73	2.59		15.65		12.36			8.92	8.08	0.16		1.82	2.96	0.63
[3658]	CONVERGENT MARGIN	HONSHU ARC / SOUTHWESTERN HONSHU ARC / HONSHU	CHUGOKU DISTRICT, NAGAWASE	34	36	132	136	SAE			s_TK-2 [3658]	BASALT, THOLEIITIC [3658]				CENOZOIC [3658]					VOL			F		WR [3658]	47.66	1.47		18.6		9.4			10.47	6.18	0.13		0.67	3.02	0.4
[3658]	CONVERGENT MARGIN	HONSHU ARC / SOUTHWESTERN HONSHU ARC / HONSHU	CHUGOKU DISTRICT, KUSHIYAMA	34	36	132	136	SAE			s_TK-7 [3658]	BASALT, THOLEIITIC [3658]				CENOZOIC [3658]					VOL			F		WR [3658]	51.26	1.24		16.99		9.97			8.54	6.74	0.15		0.99	3.19	0.5
[3658]	CONVERGENT MARGIN	HONSHU ARC / SOUTHWESTERN HONSHU ARC / HONSHU	CHUGOKU DISTRICT, EJIMA	34	36	132	136	SAE			s_TK-8 [3658]	BASALT, THOLEIITIC [3658]				CENOZOIC [3658]					VOL			F		WR [3658]	50.5	1.44		17.57		11.1			9.06	7.03	0.14		0.37	2.93	0.2
[3658]	CONVERGENT MARGIN	HONSHU ARC / SOUTHWESTERN HONSHU ARC / SHIKOKU/SIKOKU	CHUGOKU DISTRICT, SHINGU	33.7	34	133.5	134	SAE			s_A-1 [3658]	BASALT, ALKALINE [3658]				CENOZOIC [3658]					VOL			F		WR [3658]	43.76	2.07		14.82		10.53			8.95	7.68	0.16		1.88	2.47	0.52
[3658]	CONVERGENT MARGIN	HONSHU ARC / SOUTHWESTERN HONSHU ARC / HONSHU	CHUGOKU DISTRICT, HAMADA	34.8	35	132	132.2	SAE			s_81815-3 [3658]	NEPHELINITE [3658]				CENOZOIC [3658]					VOL			F		WR [3658]	35.38	2.68		11.08		15.99			15.32	9.19	0.33		1.63	3.02	2.35
[3658]	CONVERGENT MARGIN	HONSHU ARC / SOUTHWESTERN HONSHU ARC / IKI SHIMA	HIGASHI-MATSUURA DISTRICT	33.7	33.9	129.6	129.8	SAE			s_81812-8 [3658]	HAWAIITE [3658]				CENOZOIC [3658]					VOL			F		WR [3658]	48.65	2.31		16.96		11.07			7.49	6.07	0.15		2.01	6.25	0.84
[3658]	CONVERGENT MARGIN	HONSHU ARC / SOUTHWESTERN HONSHU ARC / HIRADO SHIMA	TAIWAN SHINZI FOLDED ZONE, KITA-MATSUURA DISTRICT	33.2	33.2	129.6	129.6	SAE			s_80916-1 [3658]	BASALT, ALKALINE [3658]				CENOZOIC [3658]					VOL			F		WR [3658]	48.43	1.33		14.07		10.31			8.88	8.29	0.14		1.47	3.27	0.41
[3658]	CONVERGENT MARGIN	HONSHU ARC / SOUTHWESTERN HONSHU ARC / KYUSHU	HIGASHI-MATSUURA DISTRICT, KIRIGO	32.5	33.5	129	131	SAE			s_80814-1 [3658]	BASALT, ALKALINE [3658]				CENOZOIC [3658]					VOL			F		WR [3658]	48.39	1.8		17.52		10.97			8.21	5.52	0.16		1.69	3.68	0.48
[3658]	CONVERGENT MARGIN	HONSHU ARC / SOUTHWESTERN HONSHU ARC / KYUSHU	HIGASHI-MATSUURA DISTRICT, ISHIMURO	32.5	33.5	129	131	SAE			s_80802-6 [3658]	BASALT, ALKALINE [3658]				CENOZOIC [3658]					VOL			F		WR [3658]	49.04	1.82		14.8		12.35			9.63	9.52	0.17		1.07	3.03	0.29
[3658]	CONVERGENT MARGIN	HONSHU ARC / SOUTHWESTERN HONSHU ARC / KYUSHU	KITA-MATSUURA DISTRICT, NONOGASHIRA	32.5	33.5	129	131	SAE			s_80906-7 [3658]	BASALT, THOLEIITIC [3658]				CENOZOIC [3658]					VOL			F		WR [3658]	51	1.66		15.88		9.98			9.1	7.4	0.15		1.2	3.5	0.33
[3658]	CONVERGENT MARGIN	HONSHU ARC / SOUTHWESTERN HONSHU ARC / KYUSHU	KITA-MATSUURA DISTRICT, KUNIMI	32.5	33.5	129	131	SAE			s_80903-3 [3658]	BASALT, ALKALINE [3658]				CENOZOIC [3658]					VOL			F		WR [3658]	47.99	2.42		16.1		12.09			8.82	6.9	0.16		1.51	3.5	0.53
[19989]	CONVERGENT MARGIN	HONSHU ARC / NORTHEASTERN HONSHU ARC / HONSHU / KAMO BASALT	BACK-ARC, OGA PENINSULA	39.9	39.92	139.72	139.73	SAE			s_084 [19989]	BASALT [19989]	32000000 [19989]	32000000 [19989]	EARLY [19989]	OLIGOCENE [19989]					VOL					WR [19989]	50.57	1.41		17.25				8.31	7.9	6.03	0.16		0.98	3.52	0.35
[19989]	CONVERGENT MARGIN	HONSHU ARC / NORTHEASTERN HONSHU ARC / HONSHU / KAMO BASALT	BACK-ARC, OGA PENINSULA	39.9	39.92	139.72	139.73	SAE			s_127 [19989]	BASALT [19989]	32000000 [19989]	32000000 [19989]	EARLY [19989]	OLIGOCENE [19989]					VOL					WR [19989]	51.67	1.14		18.72				7.37	8.78	5.05	0.16		0.81	3.83	0.21
[19989]	CONVERGENT MARGIN	HONSHU ARC / NORTHEASTERN HONSHU ARC / HONSHU / KAMO BASALT	BACK-ARC, OGA PENINSULA	39.9	39.92	139.72	139.73	SAE			s_KH07 [19989]	BASALT [19989]	32000000 [19989]	32000000 [19989]	EARLY [19989]	OLIGOCENE [19989]					VOL					WR [19989]	51.54	1.49		17.45				7.7	7.73	5.43	0.14		1	3.8	0.34
[19989]	CONVERGENT MARGIN	HONSHU ARC / NORTHEASTERN HONSHU ARC / HONSHU / KAMO BASALT	BACK-ARC, OGA PENINSULA	39.9	39.92	139.72	139.73	SAE			s_KH16 [19989]	BASALT [19989]	32000000 [19989]	32000000 [19989]	EARLY [19989]	OLIGOCENE [19989]					VOL					WR [19989]	51.32	1.15		17.05				7.68	9.25	6.57	0.19		0.81	3.1	0.24
[19989]	CONVERGENT MARGIN	HONSHU ARC / NORTHEASTERN HONSHU ARC / HONSHU / TAKADATE VOLCANICS	FRONTAL ARC	38	38.5	140.5	141	SAE			s_TA03 [19989]	BASALT [19989]	22000000 [19989]	22000000 [19989]	EARLY [19989]	MIOCENE [19989]					VOL					WR [19989]	51.78	0.87		18.19				8.79	9.62	5.86	0.18		0.35	2.67	0.15
[19989]	CONVERGENT MARGIN	HONSHU ARC / NORTHEASTERN HONSHU ARC / HONSHU / TAKADATE VOLCANICS	FRONTAL ARC	38	38.5	140.5	141	SAE			s_TA05 [19989]	BASALT [19989]	22000000 [19989]	22000000 [19989]	EARLY [19989]	MIOCENE [19989]					VOL					WR [19989]	49.74	0.8		16.69				9.15	10.2	7.53	0.18		0.3	2.24	0.1
[19989]	CONVERGENT MARGIN	HONSHU ARC / NORTHEASTERN HONSHU ARC / HONSHU / TAKADATE VOLCANICS	FRONTAL ARC	38	38.5	140.5	141	SAE			s_TA06 [19989]	BASALT [19989]	22000000 [19989]	22000000 [19989]	EARLY [19989]	MIOCENE [19989]					VOL					WR [19989]	51.6	0.86		18.16				8.7	9.44	5.95	0.18		0.46	2.69	0.15
[19989]	CONVERGENT MARGIN	HONSHU ARC / NORTHEASTERN HONSHU ARC / HONSHU / TAKADATE VOLCANICS	FRONTAL ARC	38	38.5	140.5	141	SAE			s_TA10 [19989]	BASALT [19989]	22000000 [19989]	22000000 [19989]	EARLY [19989]	MIOCENE [19989]					VOL					WR [19989]	51.5	0.85		18.15				8.59	9.5	5.82	0.19		0.47	2.66	0.14
[19989]	CONVERGENT MARGIN	HONSHU ARC / NORTHEASTERN HONSHU ARC / HONSHU / TENMYOSAN BASALT	FRONTAL ARC	37.7	37.8	140.7	141	SAE			s_TM01 [19989]	BASALT [19989]	20000000 [19989]	20000000 [19989]	EARLY [19989]	MIOCENE [19989]					VOL					WR [19989]	48.86	0.68		14.86				9.35	10.36	11.77	0.17		0.24	2.14	0.07
[19989]	CONVERGENT MARGIN	HONSHU ARC / NORTHEASTERN HONSHU ARC / HONSHU / TENMYOSAN BASALT	FRONTAL ARC	37.7	37.8	140.7	141	SAE			s_TM02 [19989]	BASALT [19989]	20000000 [19989]	20000000 [19989]	EARLY [19989]	MIOCENE [19989]					VOL					WR [19989]	48.29	0.67		14.71				9.39	10.55	11.69	0.18		0.25	1.92	0.07
[19989]	CONVERGENT MARGIN	HONSHU ARC / NORTHEASTERN HONSHU ARC / HONSHU / TENMYOSAN BASALT	FRONTAL ARC	37.7	37.8	140.7	141	SAE			s_TM10 [19989]	BASALT [19989]	20000000 [19989]	20000000 [19989]	EARLY [19989]	MIOCENE [19989]					VOL					WR [19989]	49.82	0.73		16.15				8.78	10.44	9.28	0.16		0.3	2.39	0.08
[19989]	CONVERGENT MARGIN	HONSHU ARC / NORTHEASTERN HONSHU ARC / HONSHU / TENMYOSAN BASALT	FRONTAL ARC	37.7	37.8	140.7	141	SAE			s_TM11 [19989]	BASALT [19989]	20000000 [19989]	20000000 [19989]	EARLY [19989]	MIOCENE [19989]					VOL					WR [19989]	50.13	0.72		16.14				8.69	10.31	9.7	0.16		0.32	2.41	0.09
[19989]	CONVERGENT MARGIN	HONSHU ARC / NORTHEASTERN HONSHU ARC / HONSHU / TENMYOSAN BASALT	FRONTAL ARC	37.7	37.8	140.7	141	SAE			s_TM12 [19989]	BASALT [19989]	20000000 [19989]	20000000 [19989]	EARLY [19989]	MIOCENE [19989]					VOL					WR [19989]	49.95	0.72		16.15				8.69	10.37	9.3	0.16		0.3	2.4	0.08
[19989]	CONVERGENT MARGIN	HONSHU ARC / NORTHEASTERN HONSHU ARC / HONSHU / TENMYOSAN BASALT	FRONTAL ARC	37.7	37.8	140.7	141	SAE			s_TM13 [19989]	BASALT [19989]	20000000 [19989]	20000000 [19989]	EARLY [19989]	MIOCENE [19989]					VOL					WR [19989]	48.82	0.68		15.36				9.16	10.53	10.74	0.18		0.23	2.13	0.07
[19989]	CONVERGENT MARGIN	HONSHU ARC / NORTHEASTERN HONSHU ARC / HONSHU / TENMYOSAN BASALT	FRONTAL ARC	37.7	37.8	140.7	141	SAE			s_TM14 [19989]	BASALT [19989]	20000000 [19989]	20000000 [19989]	EARLY [19989]	MIOCENE [19989]					VOL					WR [19989]	49.31	0.68		15.38				9.01	10.53	10.88	0.17		0.2	2.19	0.07
[19989]	CONVERGENT MARGIN	HONSHU ARC / NORTHEASTERN HONSHU ARC / HONSHU / TENMYOSAN BASALT	FRONTAL ARC	37.7	37.8	140.7	141	SAE			s_TM20 [19989]	BASALT [19989]	20000000 [19989]	20000000 [19989]	EARLY [19989]	MIOCENE [19989]					VOL					WR [19989]	50.07	0.72		15.48				8.29	9.32	10.22	0.15		0.41	2.22	0.09
[19989]	CONVERGENT MARGIN	HONSHU ARC / NORTHEASTERN HONSHU ARC / HONSHU / ROKUGO BASALT	FRONTAL ARC	39	40	140.5	141.5	SAE			s_MG15(HG15) [19989]	BASALT [19989]	15000000 [19989]	15000000 [19989]	MIDDLE [19989]	MIOCENE [19989]					VOL					WR [19989]	50.24	1.19		16.11				11.01	9.23	5.62	0.17		0.21	2.19	0.17
[19989]	CONVERGENT MARGIN	HONSHU ARC / NORTHEASTERN HONSHU ARC / HONSHU / NAKUIDAKE BASALT	FRONTAL ARC	40.37	40.39	141.2	141.4	SAE			s_604(0604) [19989]	BASALT [19989]	15000000 [19989]	15000000 [19989]	MIDDLE [19989]	MIOCENE [19989]					VOL					WR [19989]	50.52	0.6		18.12				9.89	10.84	5.56	0.17		0.26	1.71	0.06
[19989]	CONVERGENT MARGIN	HONSHU ARC / NORTHEASTERN HONSHU ARC / HONSHU / WASHINOSHU BASALT	FRONTAL ARC	38.5	39.5	140.5	141.5	SAE			s_WA06 [19989]	BASALT [19989]	12000000 [19989]	12000000 [19989]	MIDDLE [19989]	MIOCENE [19989]					VOL					WR [19989]	47.8	0.75		19.61				8.14	9.68	4.86	0.09		0.41	2.23	0.12
[19989]	CONVERGENT MARGIN	HONSHU ARC / NORTHEASTERN HONSHU ARC / HONSHU / WASHINOSHU BASALT	FRONTAL ARC	38.5	39.5	140.5	141.5	SAE			s_0628E [19989]	BASALT [19989]	12000000 [19989]	12000000 [19989]	MIDDLE [19989]	MIOCENE [19989]					VOL					WR [19989]	50.52	0.81		18.93				7.74	9.95	5.28	0.09		0.43	2.62	0.12
[19989]	CONVERGENT MARGIN	HONSHU ARC / NORTHEASTERN HONSHU ARC / HONSHU	BACK-ARC, TAPPI(ZAKI)	41.23	41.28	140.31	140.37	SAE			s_TP23A [19989]	BASALT [19989]	13000000 [19989]	13000000 [19989]	MIDDLE [19989]	MIOCENE [19989]					VOL					WR [19989]	49.37	0.86		17.87				9.34	10.66	7.25	0.21		0.31	1.94	0.14
[19989]	CONVERGENT MARGIN	HONSHU ARC / NORTHEASTERN HONSHU ARC / HONSHU	BACK-ARC, TAPPI(ZAKI)	41.23	41.28	140.31	140.37	SAE			s_KS03 [19989]	BASALT [19989]	12500000 [19989]	12500000 [19989]	MIDDLE [19989]	MIOCENE [19989]					VOL					WR [19989]	51.72	0.79		19.67				8.32	10.7	5.1	0.16		0.24	2.51	0.12
[19989]	CONVERGENT MARGIN	HONSHU ARC / NORTHEASTERN HONSHU ARC / HONSHU	BACK-ARC, TAPPI(ZAKI)	41.23	41.28	140.31	140.37	SAE			s_TP14 [19989]	BASALT [19989]	14400000 [19989]	14400000 [19989]	MIDDLE [19989]	MIOCENE [19989]					VOL					WR [19989]	50.77	1.27		16.66				11.84	9.58	5.43	0.13		0.52	2.11	0.14
[19989]	CONVERGENT MARGIN	HONSHU ARC / NORTHEASTERN HONSHU ARC / TOBISHIMA	BACK-ARC	39.16	39.23	139.5	139.58	SAE			s_TO13 [19989]	BASALT [19989]	15000000 [19989]	15000000 [19989]	MIDDLE [19989]	MIOCENE [19989]					VOL					WR [19989]	50	0.91		17.03				8.52	11.42	6.75	0.2		0.16	2.24	0.12
[19989]	CONVERGENT MARGIN	HONSHU ARC / NORTHEASTERN HONSHU ARC / SADO-SHIMA / OGI BASALT	BACK-ARC, SADO ISLANDS, NIIGATA AREA	37.75	37.92	138.17	138.33	SAE			s_SW01N [19989]	BASALT [19989]	12000000 [19989]	12000000 [19989]	MIDDLE [19989]	MIOCENE [19989]					VOL					WR [19989]	48.04	0.89		15.62				7.63	12.01	7.98	0.12		0.81	2.08	0.18
[19989]	CONVERGENT MARGIN	HONSHU ARC / NORTHEASTERN HONSHU ARC / SADO-SHIMA / OGI BASALT	BACK-ARC, SADO ISLANDS, NIIGATA AREA	37.75	37.92	138.17	138.33	SAE			s_SW01S [19989]	BASALT [19989]	12000000 [19989]	12000000 [19989]	MIDDLE [19989]	MIOCENE [19989]					VOL					WR [19989]	48.35	0.6		15.62				7	13.58	8.72	0.12		0.47	1.52	0.13
[19989]	CONVERGENT MARGIN	HONSHU ARC / NORTHEASTERN HONSHU ARC / SADO-SHIMA / OGI BASALT	BACK-ARC, SADO ISLANDS, NIIGATA AREA	37.75	37.92	138.17	138.33	SAE			s_SR01 [19989]	BASALT [19989]	12000000 [19989]	12000000 [19989]	MIDDLE [19989]	MIOCENE [19989]					VOL					WR [19989]	49.51	1.03		15.24				7.96	10.71	8.01	0.15		0.55	2.09	0.2
[19989]	CONVERGENT MARGIN	HONSHU ARC / NORTHEASTERN HONSHU ARC / HONSHU / JOGE VOLCANICS	FRONTAL ARC	38	38.5	140.5	141	SAE			s_71 [19989]	BASALT [19989]	8200000 [19989]	8200000 [19989]	LATE [19989]	MIOCENE [19989]					VOL					WR [19989]	50.98	0.54		17.44				8.59	10.81	5.91	0.17		0.13	1.6	0.05
[19989]	CONVERGENT MARGIN	HONSHU ARC / NORTHEASTERN HONSHU ARC / HONSHU / JOGE VOLCANICS	FRONTAL ARC	38	38.5	140.5	141	SAE			s_SI14 [19989]	BASALT [19989]	8200000 [19989]	8200000 [19989]	LATE [19989]	MIOCENE [19989]					VOL					WR [19989]	50	0.62		17.89				9.13	10.47	5.83	0.2		0.09	1.52	0.05
[19989]	CONVERGENT MARGIN	HONSHU ARC / NORTHEASTERN HONSHU ARC / HONSHU / JOGE VOLCANICS	FRONTAL ARC	38	38.5	140.5	141	SAE			s_J18 [19989]	BASALT [19989]	8200000 [19989]	8200000 [19989]	LATE [19989]	MIOCENE [19989]					VOL					WR [19989]	52.14	0.93		16.07				10.87	10.61	6.03	0.21		0.18	2.01	0.08
[19989]	CONVERGENT MARGIN	HONSHU ARC / NORTHEASTERN HONSHU ARC / HONSHU / MITAKI VOLCANICS	FRONTAL ARC	38	38.5	140.5	141	SAE			s_TA1 [19989]	BASALT [19989]	7900000 [19989]	7900000 [19989]	LATE [19989]	MIOCENE [19989]					VOL					WR [19989]	50.24	0.68		17.5				9.78	11.42	7.05	0.18		0.15	1.64	0.05
[19989]	CONVERGENT MARGIN	HONSHU ARC / NORTHEASTERN HONSHU ARC / HONSHU / MITAKI VOLCANICS	FRONTAL ARC	38	38.5	140.5	141	SAE			s_TA2 [19989]	BASALT [19989]	7900000 [19989]	7900000 [19989]	LATE [19989]	MIOCENE [19989]					VOL					WR [19989]	49.97	0.69		17.63				9.66	11.39	6.63	0.18		0.15	1.63	0.05
[19989]	CONVERGENT MARGIN	HONSHU ARC / NORTHEASTERN HONSHU ARC / HONSHU / MITAKI VOLCANICS	FRONTAL ARC	38	38.5	140.5	141	SAE			s_TA3 [19989]	BASALT [19989]	7900000 [19989]	7900000 [19989]	LATE [19989]	MIOCENE [19989]					VOL					WR [19989]	50.09	0.71		17.46				9.68	11.38	6.69	0.18		0.15	1.64	0.06
[19989]	CONVERGENT MARGIN	HONSHU ARC / NORTHEASTERN HONSHU ARC / HONSHU / AOSAWA FORMATION	BACK-ARC REGION, AKITA-YAMAGATA AREA	38	41	139.5	141	SAE			s_NM03 [19989]	BASALT [19989]	10400000 [19989]	10400000 [19989]	LATE [19989]	MIOCENE [19989]					VOL					WR [19989]	48.03	0.98		17.73				7.18	9.1	6.55	0.22		0.53	2.63	0.22
[19989]	CONVERGENT MARGIN	HONSHU ARC / NORTHEASTERN HONSHU ARC / HONSHU / AOSAWA FORMATION	BACK-ARC REGION, AKITA-YAMAGATA AREA	38	41	139.5	141	SAE			s_NM24 [19989]	BASALT [19989]	10400000 [19989]	10400000 [19989]	LATE [19989]	MIOCENE [19989]					VOL					WR [19989]	47.6	1.13		16.2				7.79	10.33	7.17	0.18		0.26	2.53	0.21
[19989]	CONVERGENT MARGIN	HONSHU ARC / NORTHEASTERN HONSHU ARC / HONSHU / AOSAWA FORMATION	BACK-ARC REGION, AKITA-YAMAGATA AREA	38	41	139.5	141	SAE			s_NM42 [19989]	BASALT [19989]	10400000 [19989]	10400000 [19989]	LATE [19989]	MIOCENE [19989]					VOL					WR [19989]	47.63	1.03		16.72				8.59	9.87	7.39	0.18		0.44	2.43	0.21
[19989]	CONVERGENT MARGIN	HONSHU ARC / NORTHEASTERN HONSHU ARC / HONSHU / AIZOME BASALT	BACK-ARC	39.5	40.5	139.5	140.5	SAE			s_AZ01 [19989]	BASALT [19989]	10200000 [19989]	10200000 [19989]	LATE [19989]	MIOCENE [19989]					VOL					WR [19989]	50.05	0.89		16.84				8.07	9.02	6.85	0.12		0.78	2.59	0.21
[19989]	CONVERGENT MARGIN	HONSHU ARC / NORTHEASTERN HONSHU ARC / HONSHU / AIZOME BASALT	BACK-ARC	39.5	40.5	139.5	140.5	SAE			s_AZ02 [19989]	BASALT [19989]	10200000 [19989]	10200000 [19989]	LATE [19989]	MIOCENE [19989]					VOL					WR [19989]	49.91	0.88		17.13				7.8	9.05	6.93	0.07		0.57	2.38	0.18
[19989]	CONVERGENT MARGIN	HONSHU ARC / NORTHEASTERN HONSHU ARC / HONSHU / AIZOME BASALT	BACK-ARC	39.5	40.5	139.5	140.5	SAE			s_AZ03 [19989]	BASALT [19989]	10200000 [19989]	10200000 [19989]	LATE [19989]	MIOCENE [19989]					VOL					WR [19989]	50.25	0.9		17.14				7.71	8.95	6.78	0.07		0.57	2.35	0.18
[19989]	CONVERGENT MARGIN	HONSHU ARC / NORTHEASTERN HONSHU ARC / HONSHU / AIZOME BASALT	BACK-ARC	39.5	40.5	139.5	140.5	SAE			s_AZ04 [19989]	BASALT [19989]	10200000 [19989]	10200000 [19989]	LATE [19989]	MIOCENE [19989]					VOL					WR [19989]	50.21	0.82		15.67				7.75	9.51	7.6	0.14		0.58	2.25	0.16
[19989]	CONVERGENT MARGIN	HONSHU ARC / NORTHEASTERN HONSHU ARC / TOBISHIMA	BACK-ARC	39.16	39.23	139.5	139.58	SAE			s_TB14 [19989]	BASALT [19989]	9300000 [19989]	9300000 [19989]	LATE [19989]	MIOCENE [19989]					VOL					WR [19989]	51.84	1.14		16.22				8.37	9.8	6.78	0.24		0.4	2.81	0.22
[19989]	CONVERGENT MARGIN	HONSHU ARC / NORTHEASTERN HONSHU ARC / TOBISHIMA	BACK-ARC	39.16	39.23	139.5	139.58	SAE			s_TB15 [19989]	BASALT [19989]	9300000 [19989]	9300000 [19989]	LATE [19989]	MIOCENE [19989]					VOL					WR [19989]	50.21	1.3		19.43				6.54	8.14	7.89	0.09		0.26	3.08	0.25
[19989]	CONVERGENT MARGIN	HONSHU ARC / NORTHEASTERN HONSHU ARC / TOBISHIMA	BACK-ARC	39.16	39.23	139.5	139.58	SAE			s_TB25A [19989]	BASALT [19989]	9300000 [19989]	9300000 [19989]	LATE [19989]	MIOCENE [19989]					VOL					WR [19989]	51.89	1.23		15.73				8.7	8.71	7.38	0.21		0.47	2.89	0.27
[19989]	CONVERGENT MARGIN	HONSHU ARC / NORTHEASTERN HONSHU ARC / TOBISHIMA	BACK-ARC	39.16	39.23	139.5	139.58	SAE			s_TB27 [19989]	BASALT [19989]	9300000 [19989]	9300000 [19989]	LATE [19989]	MIOCENE [19989]					VOL					WR [19989]	51.5	1.13		16.32				8.36	9.87	6.83	0.28		0.34	2.74	0.21
[19989]	CONVERGENT MARGIN	HONSHU ARC / NORTHEASTERN HONSHU ARC / HONSHU / KUROHANAYAMA BASALT	FRONTAL ARC	38.3	38.5	140.6	140.8	SAE			s_90901(090901) [19989]	BASALT [19989]	5600000 [19989]	5600000 [19989]		PLIOCENE [19989]					VOL					WR [19989]	51.33	0.64		17.09				9.58	10.93	7.03	0.18		0.13	1.57	0.05
[19989]	CONVERGENT MARGIN	HONSHU ARC / NORTHEASTERN HONSHU ARC / HONSHU / KUROHANAYAMA BASALT	FRONTAL ARC	38.3	38.5	140.6	140.8	SAE			s_90902(090902) [19989]	BASALT [19989]	5600000 [19989]	5600000 [19989]		PLIOCENE [19989]					VOL					WR [19989]	51.95	0.73		17.23				9.97	10.56	6.57	0.18		0.16	1.61	0.05
[19989]	CONVERGENT MARGIN	HONSHU ARC / NORTHEASTERN HONSHU ARC / HONSHU / KUROHANAYAMA BASALT	FRONTAL ARC	38.3	38.5	140.6	140.8	SAE			s_100803 [19989]	BASALT [19989]	5600000 [19989]	5600000 [19989]		PLIOCENE [19989]					VOL					WR [19989]	51.56	0.83		16.13				10.67	10.81	6.31	0.2		0.14	1.79	0.07
[19989]	CONVERGENT MARGIN	HONSHU ARC / NORTHEASTERN HONSHU ARC / HONSHU / ARAYA BASALT	FRONTAL ARC	40	40.3	141	141.3	SAE			s_AR01 [19989]	BASALT [19989]	3000000 [19989]	3000000 [19989]		PLIOCENE [19989]					VOL					WR [19989]	50.68	0.8		16.76				10.38	11.2	7.41	0.19		0.1	1.59	0.06
[19989]	CONVERGENT MARGIN	HONSHU ARC / NORTHEASTERN HONSHU ARC / HONSHU / ARAYA BASALT	FRONTAL ARC	40	40.3	141	141.3	SAE			s_AR02 [19989]	BASALT [19989]	3000000 [19989]	3000000 [19989]		PLIOCENE [19989]					VOL					WR [19989]	50.72	0.79		16.68				10.09	11.32	6.61	0.18		0.12	1.57	0.06
[19989]	CONVERGENT MARGIN	HONSHU ARC / NORTHEASTERN HONSHU ARC / HONSHU / HAKASEYAMA	FRONTAL ARC	37.37	37.37	139.72	139.72	SAE			s_90403 [19989]	BASALT [19989]	2800000 [19989]	2800000 [19989]		PLIOCENE [19989]					VOL					WR [19989]	49.68	0.77		17.36				9.43	11.25	6.73	0.19		0.44	2.13	0.15
[19989]	CONVERGENT MARGIN	HONSHU ARC / NORTHEASTERN HONSHU ARC / HONSHU / HAKASEYAMA	FRONTAL ARC	37.37	37.37	139.72	139.72	SAE			s_401 [19989]	BASALT [19989]	2800000 [19989]	2800000 [19989]		PLIOCENE [19989]					VOL					WR [19989]	51.96	0.75		17.21				8.77	10.74	5.82	0.17		0.75	2.3	0.14
[19989]	CONVERGENT MARGIN	HONSHU ARC / NORTHEASTERN HONSHU ARC / HONSHU / HAKASEYAMA	FRONTAL ARC	37.37	37.37	139.72	139.72	SAE			s_504 [19989]	BASALT [19989]	2800000 [19989]	2800000 [19989]		PLIOCENE [19989]					VOL					WR [19989]	50.89	0.76		17.39				9.24	10.75	6.7	0.18		0.55	2.15	0.14
[19989]	CONVERGENT MARGIN	HONSHU ARC / NORTHEASTERN HONSHU ARC / HONSHU / HAKASEYAMA	FRONTAL ARC	37.37	37.37	139.72	139.72	SAE			s_420 [19989]	BASALT [19989]	2800000 [19989]	2800000 [19989]		PLIOCENE [19989]					VOL					WR [19989]	50.97	0.79		16.39				9.64	10.14	7.82	0.18		0.53	2.07	0.12
[19989]	CONVERGENT MARGIN	HONSHU ARC / NORTHEASTERN HONSHU ARC / HONSHU / INANIWADAKE	FRONTAL ARC	40.12	40.23	140	140.13	SAE			s_IN10 [19989]	BASALT [19989]	2700000 [19989]	2700000 [19989]		PLIOCENE [19989]					VOL					WR [19989]	51.69	0.97		15.79				11.52	10.61	5.78	0.21		0.1	1.7	0.06
[19989]	CONVERGENT MARGIN	HONSHU ARC / NORTHEASTERN HONSHU ARC / HONSHU / INANIWADAKE	FRONTAL ARC	40.12	40.23	140	140.13	SAE			s_IN11 [19989]	BASALT [19989]	2700000 [19989]	2700000 [19989]		PLIOCENE [19989]					VOL					WR [19989]	51.51	0.97		15.84				11.52	10.35	5.74	0.21		0.12	1.64	0.06
[19989]	CONVERGENT MARGIN	HONSHU ARC / NORTHEASTERN HONSHU ARC / HONSHU / INANIWADAKE	FRONTAL ARC	40.12	40.23	140	140.13	SAE			s_IN12 [19989]	BASALT [19989]	2700000 [19989]	2700000 [19989]		PLIOCENE [19989]					VOL					WR [19989]	52	0.95		16.05				11.32	10.55	5.71	0.21		0.13	1.68	0.06
[19989]	CONVERGENT MARGIN	HONSHU ARC / NORTHEASTERN HONSHU ARC / HONSHU / INANIWADAKE	FRONTAL ARC	40.12	40.23	140	140.13	SAE			s_IN13 [19989]	BASALT [19989]	2700000 [19989]	2700000 [19989]		PLIOCENE [19989]					VOL					WR [19989]	51.92	0.94		16.01				11.31	10.38	5.81	0.21		0.13	1.64	0.06
[19989]	CONVERGENT MARGIN	HONSHU ARC / NORTHEASTERN HONSHU ARC / HONSHU / MANAITAYAMA FORMATION	BACK-ARC	39.8	39.8	140.2	140.2	SAE			s_MIY06 [19989]	BASALT [19989]	3600000 [19989]	3600000 [19989]		QUATERNARY [19989]					VOL					WR [19989]	51.06	1.06		17.74				8.4	10.1	4.98	0.17		0.58	2.83	0.34
[19989]	CONVERGENT MARGIN	HONSHU ARC / NORTHEASTERN HONSHU ARC / HONSHU / MYOJIN-IWA FORMATION	BACK-ARC	38	38.5	139	140	SAE			s_L138 [19989]	ANDESITE, BASALTIC [19989]	3000000 [19989]	3000000 [19989]		QUATERNARY [19989]					VOL					WR [19989]	54.24	0.98		17.12				6.59	9.39	4.92	0.16		1.61	2.75	0.18
[19989]	CONVERGENT MARGIN	HONSHU ARC / NORTHEASTERN HONSHU ARC / HONSHU / MYOJIN-IWA FORMATION	BACK-ARC	38	38.5	139	140	SAE			s_L141 [19989]	ANDESITE, BASALTIC [19989]	3000000 [19989]	3000000 [19989]		QUATERNARY [19989]					VOL					WR [19989]	53.39	1.04		17.59				7.66	9.83	5.14	0.13		1.22	2.67	0.18
[19989]	CONVERGENT MARGIN	HONSHU ARC / NORTHEASTERN HONSHU ARC / HONSHU / AJARAYAMA	FRONTAL ARC	40.4041	40.4041	140.594	140.594	SAE			s_4-01A [19989]	BASALT [19989]	1900000 [19989]	1900000 [19989]		QUATERNARY [19989]					VOL					WR [19989]	51.75	0.87		17.28				10	10.69	6.1	0.19		0.14	2.1	0.1
[19989]	CONVERGENT MARGIN	HONSHU ARC / NORTHEASTERN HONSHU ARC / HONSHU / AJARAYAMA	FRONTAL ARC	40.4041	40.4041	140.594	140.594	SAE			s_3-11A [19989]	BASALT [19989]	1900000 [19989]	1900000 [19989]		QUATERNARY [19989]					VOL					WR [19989]	50.86	0.92		17.67				9.71	10.94	5.7	0.19		0.23	2.27	0.11
[19989]	CONVERGENT MARGIN	HONSHU ARC / NORTHEASTERN HONSHU ARC / HONSHU / FUNAGATA	FRONTAL ARC, NASU VOLCANIC ZONE	37.5	38.5	140.5	141.5	SAE			s_FU02 [19989]	BASALT [19989]	900000 [19989]	900000 [19989]		QUATERNARY [19989]					VOL					WR [19989]	51.42	0.82		17.97				9.33	10.54	6.41	0.17		0.21	2.14	0.08
[19989]	CONVERGENT MARGIN	HONSHU ARC / NORTHEASTERN HONSHU ARC / HONSHU / FUNAGATA	FRONTAL ARC, NASU VOLCANIC ZONE	37.5	38.5	140.5	141.5	SAE			s_FU05 [19989]	BASALT [19989]	900000 [19989]	900000 [19989]		QUATERNARY [19989]					VOL					WR [19989]	51.43	0.84		18.07				9.39	10.39	6.53	0.18		0.2	2.06	0.08
[19989]	CONVERGENT MARGIN	HONSHU ARC / NORTHEASTERN HONSHU ARC / HONSHU / FUNAGATA	FRONTAL ARC, NASU VOLCANIC ZONE	37.5	38.5	140.5	141.5	SAE			s_FU06 [19989]	BASALT [19989]	900000 [19989]	900000 [19989]		QUATERNARY [19989]					VOL					WR [19989]	51.51	0.83		18.04				9.33	10.49	6.48	0.18		0.19	2.14	0.08
[19989]	CONVERGENT MARGIN	HONSHU ARC / NORTHEASTERN HONSHU ARC / HONSHU / IWATE	FRONTAL ARC	39.88	39.88	140.98	140.98	SAE			s_IW01 [19989]	BASALT [19989]	100000 [19989]	100000 [19989]		QUATERNARY [19989]					VOL					WR [19989]	51.5	0.78		17.02				9.33	10.62	7.67	0.17		0.09	1.94	0.08
[19989]	CONVERGENT MARGIN	HONSHU ARC / NORTHEASTERN HONSHU ARC / HONSHU / IWATE	FRONTAL ARC	39.88	39.88	140.98	140.98	SAE			s_IW02 [19989]	BASALT [19989]	100000 [19989]	100000 [19989]		QUATERNARY [19989]					VOL					WR [19989]	51.26	0.78		16.92				9.4	10.39	7.85	0.17		0.09	1.92	0.08
[19989]	CONVERGENT MARGIN	HONSHU ARC / NORTHEASTERN HONSHU ARC / HONSHU / IWATE	FRONTAL ARC	39.88	39.88	140.98	140.98	SAE			s_IW04 [19989]	BASALT [19989]	100000 [19989]	100000 [19989]		QUATERNARY [19989]					VOL					WR [19989]	51.53	0.78		16.93				9.38	10.33	7.87	0.17		0.11	1.94	0.08
[19989]	CONVERGENT MARGIN	HONSHU ARC / NORTHEASTERN HONSHU ARC / HONSHU / IWATE	FRONTAL ARC	39.88	39.88	140.98	140.98	SAE			s_IW05 [19989]	BASALT [19989]	100000 [19989]	100000 [19989]		QUATERNARY [19989]					VOL					WR [19989]	51.01	0.78		16.85				9.52	10.42	8.17	0.17		0.05	1.89	0.08
[19989]	CONVERGENT MARGIN	HONSHU ARC / NORTHEASTERN HONSHU ARC / HONSHU / IWATE	FRONTAL ARC	39.88	39.88	140.98	140.98	SAE			s_IW06 [19989]	BASALT [19989]	100000 [19989]	100000 [19989]		QUATERNARY [19989]					VOL					WR [19989]	51.4	0.78		16.96				9.4	10.41	7.88	0.17		0.1	1.96	0.08
[19989]	CONVERGENT MARGIN	HONSHU ARC / NORTHEASTERN HONSHU ARC / HONSHU / ASAKUSA	BACK-ARC	37.3433	37.3433	139.234	139.234	SAE			s_14201 [19989]	BASALT [19989]	1000000 [19989]	1000000 [19989]		QUATERNARY [19989]					VOL					WR [19989]	49.64	0.93		19.15				9.14	10.27	5.76	0.18		0.86	2.13	0.21
[19989]	CONVERGENT MARGIN	HONSHU ARC / NORTHEASTERN HONSHU ARC / HONSHU / ASAKUSA	BACK-ARC	37.3433	37.3433	139.234	139.234	SAE			s_35202 [19989]	BASALT [19989]	1000000 [19989]	1000000 [19989]		QUATERNARY [19989]					VOL					WR [19989]	49.36	0.95		19.78				9.16	10.36	5.62	0.18		0.71	2.2	0.24
[19989]	CONVERGENT MARGIN	HONSHU ARC / NORTHEASTERN HONSHU ARC / HONSHU / ASAKUSA	BACK-ARC	37.3433	37.3433	139.234	139.234	SAE			s_54109 [19989]	BASALT [19989]	1000000 [19989]	1000000 [19989]		QUATERNARY [19989]					VOL					WR [19989]	47.92	0.99		20.03				9.5	10.14	5.68	0.19		0.52	2.08	0.23
[19989]	CONVERGENT MARGIN	HONSHU ARC / NORTHEASTERN HONSHU ARC / HONSHU / ASAKUSA	BACK-ARC	37.3433	37.3433	139.234	139.234	SAE			s_61106 [19989]	BASALT [19989]	1000000 [19989]	1000000 [19989]		QUATERNARY [19989]					VOL					WR [19989]	47.65	0.97		19.8				9.4	9.96	5.53	0.18		0.66	2.08	0.24
[19989]	CONVERGENT MARGIN	HONSHU ARC / NORTHEASTERN HONSHU ARC / HONSHU / CHOKAI/TYOKAI	BACK-ARC	39.13	39.13	140.07	140.07	SAE			s_CH02 [19989]	ANDESITE, BASALTIC [19989]				QUATERNARY [19989]					VOL					WR [19989]	53.78	0.92		17.8				7.7	8.53	5.34	0.17		1.6	3.07	0.24
[19989]	CONVERGENT MARGIN	HONSHU ARC / NORTHEASTERN HONSHU ARC / HONSHU / KAMPU	BACK ARC, OGA PENINSULA	39.93	39.93	139.87	139.87	SAE			s_81710 [19989]	ANDESITE, BASALTIC [19989]	100000 [19989]	100000 [19989]		QUATERNARY [19989]					VOL					WR [19989]	52.08	0.83		18.27				7.8	9.42	5.58	0.17		1.45	2.94	0.25
[19989]	CONVERGENT MARGIN	HONSHU ARC / NORTHEASTERN HONSHU ARC / HONSHU / KAMPU	BACK ARC, OGA PENINSULA	39.93	39.93	139.87	139.87	SAE			s_82008 [19989]	ANDESITE, BASALTIC [19989]	100000 [19989]	100000 [19989]		QUATERNARY [19989]					VOL					WR [19989]	52.7	0.8		18.14				7.67	9.05	5.36	0.17		1.49	3.01	0.26
[19989]	CONVERGENT MARGIN	HONSHU ARC / NORTHEASTERN HONSHU ARC / HONSHU / SANNOME-GATA	BACK-ARC, OGA PENINSULA	39.95	39.95	139.73	139.73	SAE			s_SMG01 [19989]	BASALT [19989]	20000 [19989]	20000 [19989]		QUATERNARY [19989]					VOL					WR [19989]	49.11	0.85		16.31				8.49	10.72	9.37	0.17		1	2.22	0.16
[19989]	CONVERGENT MARGIN	HONSHU ARC / NORTHEASTERN HONSHU ARC / HONSHU / SANNOME-GATA	BACK-ARC, OGA PENINSULA	39.95	39.95	139.73	139.73	SAE			s_SMG02 [19989]	BASALT [19989]	20000 [19989]	20000 [19989]		QUATERNARY [19989]					VOL					WR [19989]	48.74	0.82		15.64				8.58	10.61	10.23	0.17		0.95	2.19	0.16
[19989]	CONVERGENT MARGIN	HONSHU ARC / NORTHEASTERN HONSHU ARC / HONSHU / SANNOME-GATA	BACK-ARC, OGA PENINSULA	39.95	39.95	139.73	139.73	SAE			s_SMG04 [19989]	BASALT [19989]	20000 [19989]	20000 [19989]		QUATERNARY [19989]					VOL					WR [19989]	50.09	0.83		16.18				8.03	9.24	8.68	0.21		1.29	2.36	0.17
[19989]	CONVERGENT MARGIN	HONSHU ARC / NORTHEASTERN HONSHU ARC / HONSHU / SANNOME-GATA	BACK-ARC, OGA PENINSULA	39.95	39.95	139.73	139.73	SAE			s_SMG05 [19989]	BASALT [19989]	20000 [19989]	20000 [19989]		QUATERNARY [19989]					VOL					WR [19989]	50.22	0.8		16.42				7.9	9.19	8.42	0.17		1.08	2.38	0.18
[19989]	CONVERGENT MARGIN	HONSHU ARC / NORTHEASTERN HONSHU ARC / HOKKAIDO / FUKUYAMA BASALT	BACK-ARC, SOUTHWESTERN HOKKAIDO, MATSUMAE PENINSULA	41.3	41.7	140	140.5	SAE			s_YO10 [19989]	BASALT [19989]									VOL					WR [19989]
[18032]	CONVERGENT MARGIN	HONSHU ARC / SOUTHWESTERN HONSHU ARC / SHIKOKU/SIKOKU	SUGYO AREA, SUMAIZUKU UNIT(ALONG THE KUROKAWA RIVER IN THE SOUTHERN PART OF KUMAKOGEN TOWN)	33.42	33.58	132.83	133.17	SAE			s_KKR5-11 [18032]	NOT GIVEN [18032]									VOL					WR [18032]	49.28	4.21		14.78				15.63	4.05	6.36	0.27		0.55	4	0.71
[18032]	CONVERGENT MARGIN	HONSHU ARC / SOUTHWESTERN HONSHU ARC / SHIKOKU/SIKOKU	SUGYO AREA, SUMAIZUKU UNIT(ALONG THE KUROKAWA RIVER IN THE SOUTHERN PART OF KUMAKOGEN TOWN)	33.42	33.58	132.83	133.17	SAE			s_KKR109 [18032]	NOT GIVEN [18032]									VOL					WR [18032]	48.62	2.8		15.97				12.79	7.79	6.88	0.18		0.57	4	0.36
[18032]	CONVERGENT MARGIN	HONSHU ARC / SOUTHWESTERN HONSHU ARC / SHIKOKU/SIKOKU	SUGYO AREA, SUMAIZUKU UNIT(ALONG THE KUROKAWA RIVER IN THE SOUTHERN PART OF KUMAKOGEN TOWN)	33.42	33.58	132.83	133.17	SAE			s_KKR110 [18032]	NOT GIVEN [18032]									VOL					WR [18032]	48.63	3		15.64				11.96	8.37	7.17	0.25		0.79	4.13	0.37
[20470]	CONVERGENT MARGIN	HONSHU ARC / NORTHEASTERN HONSHU ARC / HOKKAIDO / USU / SOMMA LAVA		42.57	42.57	140.78	140.78	SAE			s_USU#2 [20470]	ANDESITE, BASALTIC [20470]									VOL					WR [20470]	53.51	0.86		18.75				9.47	9.77	3.56	0.18		0.49	2.75	0.17
[20470]	CONVERGENT MARGIN	HONSHU ARC / NORTHEASTERN HONSHU ARC / HOKKAIDO / USU / SOMMA LAVA		42.57	42.57	140.78	140.78	SAE			s_USU#9A [20470]	BASALT [20470]									VOL					WR [20470]	49.99	0.67		18.69				10.43	9.74	6.66	0.2		0.22	1.89	0.07
[20470]	CONVERGENT MARGIN	HONSHU ARC / NORTHEASTERN HONSHU ARC / HOKKAIDO / USU / SOMMA LAVA		42.57	42.57	140.78	140.78	SAE			s_USU#10 [20470]	BASALT [20470]									VOL					WR [20470]	49.72	0.67		18.13				10.82	9.75	7.38	0.21		0.23	1.86	0.07
[20470]	CONVERGENT MARGIN	HONSHU ARC / NORTHEASTERN HONSHU ARC / HOKKAIDO / USU / SOMMA LAVA		42.57	42.57	140.78	140.78	SAE			s_USU#16 [20470]	ANDESITE, BASALTIC [20470]									VOL					WR [20470]	54.09	0.67		20.21				7.91	9.63	3.07	0.17		0.45	2.6	0.12
[20470]	CONVERGENT MARGIN	HONSHU ARC / NORTHEASTERN HONSHU ARC / HOKKAIDO / USU / SOMMA LAVA		42.57	42.57	140.78	140.78	SAE			s_USU#18 [20470]	ANDESITE, BASALTIC [20470]									VOL					WR [20470]	52.28	0.82		19.57				9.37	10.13	3.88	0.18		0.42	2.73	0.12
[20470]	CONVERGENT MARGIN	HONSHU ARC / NORTHEASTERN HONSHU ARC / HOKKAIDO / USU / SOMMA LAVA		42.57	42.57	140.78	140.78	SAE			s_USU#36A [20470]	ANDESITE, BASALTIC [20470]									VOL					WR [20470]	52.51	0.71		17.75				9.97	9.31	5.1	0.19		0.42	2.23	0.1
[20470]	CONVERGENT MARGIN	HONSHU ARC / NORTHEASTERN HONSHU ARC / HOKKAIDO / USU / SOMMA LAVA		42.57	42.57	140.78	140.78	SAE			s_USU#48 [20470]	ANDESITE, BASALTIC [20470]									VOL					WR [20470]	54.77	0.89		18.26				9.38	8.79	2.69	0.18		0.52	3.14	0.15
[20470]	CONVERGENT MARGIN	HONSHU ARC / NORTHEASTERN HONSHU ARC / HOKKAIDO / USU / SOMMA LAVA		42.57	42.57	140.78	140.78	SAE			s_USU#55 [20470]	ANDESITE, BASALTIC [20470]									VOL					WR [20470]	54.72	0.71		18.52				8.82	9.38	3.33	0.17		0.64	2.63	0.1
[20470]	CONVERGENT MARGIN	HONSHU ARC / NORTHEASTERN HONSHU ARC / HOKKAIDO / USU / SOMMA LAVA		42.57	42.57	140.78	140.78	SAE			s_USU#64 [20470]	BASALT [20470]									VOL					WR [20470]	51.43	0.62		18.21				9.85	10.1	6.1	0.19		0.36	2.13	0.08
[20470]	CONVERGENT MARGIN	HONSHU ARC / NORTHEASTERN HONSHU ARC / HOKKAIDO	KIMOBETSU AREA	42.79	42.79	140.94	140.94	SAE			s_MRTK#1 [20470]	DIORITE [20470]									PLU					WR [20470]	59.3	0.85		16.78				6.71	5.85	4.18	0.14		2.09	3.08	0.14
[20470]	CONVERGENT MARGIN	HONSHU ARC / NORTHEASTERN HONSHU ARC / HONSHU / MEGATA - ICHINOMEGATA MAAR	OGA PENINSULA, AKITA PREFECTURE	39.95	39.95	139.73	139.73	SAE			s_IX-1 [20470]	GABBRO, HORNBLENDE [20470]									PLU					WR [20470]
[20470]	CONVERGENT MARGIN	HONSHU ARC / NORTHEASTERN HONSHU ARC / HONSHU / MEGATA - ICHINOMEGATA MAAR	OGA PENINSULA, AKITA PREFECTURE	39.95	39.95	139.73	139.73	SAE			s_IX-2 [20470]	GABBRO, HORNBLENDE [20470]									PLU					WR [20470]
[20470]	CONVERGENT MARGIN	HONSHU ARC / NORTHEASTERN HONSHU ARC / HOKKAIDO / USU / SOMMA LAVA		42.57	42.57	140.78	140.78	SAE			s_USU#1 [20470]	ANDESITE, BASALTIC [20470]									VOL					WR [20470]	53.06	0.82		19.2				9.39	10.09	3.19	0.17		0.53	2.66	0.15
[20470]	CONVERGENT MARGIN	HONSHU ARC / NORTHEASTERN HONSHU ARC / HOKKAIDO / USU / SOMMA LAVA		42.57	42.57	140.78	140.78	SAE			s_USU#3 [20470]	ANDESITE, BASALTIC [20470]									VOL					WR [20470]	53.2	0.85		18.83				9.51	9.73	3.68	0.18		0.45	2.69	0.14
[20470]	CONVERGENT MARGIN	HONSHU ARC / NORTHEASTERN HONSHU ARC / HOKKAIDO / USU / SOMMA LAVA		42.57	42.57	140.78	140.78	SAE			s_USU#4 [20470]	ANDESITE, BASALTIC [20470]									VOL					WR [20470]	53.26	0.83		19.11				9.5	10.13	3.21	0.17		0.53	2.68	0.15
[20470]	CONVERGENT MARGIN	HONSHU ARC / NORTHEASTERN HONSHU ARC / HOKKAIDO / USU / SOMMA LAVA		42.57	42.57	140.78	140.78	SAE			s_USU#5 [20470]	ANDESITE, BASALTIC [20470]									VOL					WR [20470]	53.3	0.83		18.9				9.44	9.99	3.23	0.17		0.56	2.64	0.15
[20470]	CONVERGENT MARGIN	HONSHU ARC / NORTHEASTERN HONSHU ARC / HOKKAIDO / USU / SOMMA LAVA		42.57	42.57	140.78	140.78	SAE			s_USU#8 [20470]	ANDESITE, BASALTIC [20470]									VOL					WR [20470]	54.02	0.75		18.09				9.56	9.54	3.71	0.18		0.62	2.53	0.11
[20470]	CONVERGENT MARGIN	HONSHU ARC / NORTHEASTERN HONSHU ARC / HOKKAIDO / USU / SOMMA LAVA		42.57	42.57	140.78	140.78	SAE			s_USU#9B [20470]	BASALT [20470]									VOL					WR [20470]	49.79	0.65		18.73				10.3	9.77	6.91	0.2		0.21	1.85	0.07
[20470]	CONVERGENT MARGIN	HONSHU ARC / NORTHEASTERN HONSHU ARC / HOKKAIDO / USU / SOMMA LAVA		42.57	42.57	140.78	140.78	SAE			s_USU#11 [20470]	ANDESITE, BASALTIC [20470]									VOL					WR [20470]	54.3	0.81		18.44				9.62	9.13	3.26	0.18		0.59	2.7	0.14
[20470]	CONVERGENT MARGIN	HONSHU ARC / NORTHEASTERN HONSHU ARC / HOKKAIDO / USU / SOMMA LAVA		42.57	42.57	140.78	140.78	SAE			s_USU#13 [20470]	ANDESITE, BASALTIC [20470]									VOL					WR [20470]	53.25	0.89		18.84				9.71	9.72	3.06	0.18		0.55	2.79	0.18
[20470]	CONVERGENT MARGIN	HONSHU ARC / NORTHEASTERN HONSHU ARC / HOKKAIDO / USU / SOMMA LAVA		42.57	42.57	140.78	140.78	SAE			s_USU#14 [20470]	ANDESITE, BASALTIC [20470]									VOL					WR [20470]	54.42	0.76		18.74				9.03	9.72	2.91	0.17		0.53	2.71	0.12
[20470]	CONVERGENT MARGIN	HONSHU ARC / NORTHEASTERN HONSHU ARC / HOKKAIDO / USU / SOMMA LAVA		42.57	42.57	140.78	140.78	SAE			s_USU#15 [20470]	ANDESITE, BASALTIC [20470]									VOL					WR [20470]	54.32	0.79		19.07				9.05	9.55	2.91	0.17		0.57	2.84	0.13
[20470]	CONVERGENT MARGIN	HONSHU ARC / NORTHEASTERN HONSHU ARC / HOKKAIDO / USU / SOMMA LAVA		42.57	42.57	140.78	140.78	SAE			s_USU#17 [20470]	ANDESITE, BASALTIC [20470]									VOL					WR [20470]	54.7	0.66		20.18				7.78	9.71	2.96	0.17		0.45	2.78	0.12
[20470]	CONVERGENT MARGIN	HONSHU ARC / NORTHEASTERN HONSHU ARC / HOKKAIDO / USU / SOMMA LAVA		42.57	42.57	140.78	140.78	SAE			s_USU#20 [20470]	ANDESITE, BASALTIC [20470]									VOL					WR [20470]	54.03	0.81		17.28				10.54	9.02	4.23	0.21		0.52	2.58	0.11
[20470]	CONVERGENT MARGIN	HONSHU ARC / NORTHEASTERN HONSHU ARC / HOKKAIDO / USU / SOMMA LAVA		42.57	42.57	140.78	140.78	SAE			s_USU#22 [20470]	ANDESITE, BASALTIC [20470]									VOL					WR [20470]	53.08	0.83		19.18				9.34	10.12	3.1	0.17		0.53	2.71	0.15
[20470]	CONVERGENT MARGIN	HONSHU ARC / NORTHEASTERN HONSHU ARC / HOKKAIDO / USU / SOMMA LAVA		42.57	42.57	140.78	140.78	SAE			s_USU#23 [20470]	ANDESITE, BASALTIC [20470]									VOL					WR [20470]	52.78	0.8		19.23				9.26	10.16	3.25	0.17		0.51	2.59	0.14
[20470]	CONVERGENT MARGIN	HONSHU ARC / NORTHEASTERN HONSHU ARC / HOKKAIDO / USU / SOMMA LAVA		42.57	42.57	140.78	140.78	SAE			s_USU#24 [20470]	ANDESITE, BASALTIC [20470]									VOL					WR [20470]	53.22	0.82		18.61				9.56	9.84	3.33	0.17		0.55	2.68	0.16
[20470]	CONVERGENT MARGIN	HONSHU ARC / NORTHEASTERN HONSHU ARC / HOKKAIDO / USU / SOMMA LAVA		42.57	42.57	140.78	140.78	SAE			s_USU#25 [20470]	ANDESITE, BASALTIC [20470]									VOL					WR [20470]	52.49	0.81		19.16				9.39	9.9	3.89	0.17		0.42	2.78	0.14
[20470]	CONVERGENT MARGIN	HONSHU ARC / NORTHEASTERN HONSHU ARC / HOKKAIDO / USU / SOMMA LAVA		42.57	42.57	140.78	140.78	SAE			s_USU#26 [20470]	ANDESITE, BASALTIC [20470]									VOL					WR [20470]	53.24	0.81		18.88				9.43	9.98	3.18	0.17		0.53	2.71	0.16
[20470]	CONVERGENT MARGIN	HONSHU ARC / NORTHEASTERN HONSHU ARC / HOKKAIDO / USU / SOMMA LAVA		42.57	42.57	140.78	140.78	SAE			s_USU#27 [20470]	ANDESITE, BASALTIC [20470]									VOL					WR [20470]	54.52	0.8		18.32				9.58	9.14	3.22	0.18		0.56	2.65	0.14
[20470]	CONVERGENT MARGIN	HONSHU ARC / NORTHEASTERN HONSHU ARC / HOKKAIDO / USU / SOMMA LAVA		42.57	42.57	140.78	140.78	SAE			s_USU#28A [20470]	BASALT [20470]									VOL					WR [20470]	50.27	0.65		18.45				10.42	10.01	6.85	0.2		0.21	1.93	0.06
[20470]	CONVERGENT MARGIN	HONSHU ARC / NORTHEASTERN HONSHU ARC / HOKKAIDO / USU / SOMMA LAVA		42.57	42.57	140.78	140.78	SAE			s_USU#28B [20470]	BASALT [20470]									VOL					WR [20470]	50.45	0.67		18.6				10.46	9.97	6.67	0.2		0.22	2.01	0.06
[20470]	CONVERGENT MARGIN	HONSHU ARC / NORTHEASTERN HONSHU ARC / HOKKAIDO / USU / SOMMA LAVA		42.57	42.57	140.78	140.78	SAE			s_USU#28C [20470]	BASALT [20470]									VOL					WR [20470]	50.21	0.66		18.25				10.49	9.95	6.9	0.21		0.21	1.97	0.05
[20470]	CONVERGENT MARGIN	HONSHU ARC / NORTHEASTERN HONSHU ARC / HOKKAIDO / USU / SOMMA LAVA		42.57	42.57	140.78	140.78	SAE			s_USU#29 [20470]	ANDESITE, BASALTIC [20470]									VOL					WR [20470]	53.38	0.86		18.85				9.32	9.83	3.07	0.17		0.49	2.81	0.15
[20470]	CONVERGENT MARGIN	HONSHU ARC / NORTHEASTERN HONSHU ARC / HOKKAIDO / USU / SOMMA LAVA		42.57	42.57	140.78	140.78	SAE			s_USU#30A [20470]	ANDESITE, BASALTIC [20470]									VOL					WR [20470]	54.57	0.68		19.62				8.05	9.5	3.11	0.18		0.45	2.82	0.12
[20470]	CONVERGENT MARGIN	HONSHU ARC / NORTHEASTERN HONSHU ARC / HOKKAIDO / USU / SOMMA LAVA		42.57	42.57	140.78	140.78	SAE			s_USU#30B [20470]	ANDESITE, BASALTIC [20470]									VOL					WR [20470]	54.55	0.67		19.83				7.93	9.55	3.06	0.17		0.44	2.82	0.12
[20470]	CONVERGENT MARGIN	HONSHU ARC / NORTHEASTERN HONSHU ARC / HOKKAIDO / USU / SOMMA LAVA		42.57	42.57	140.78	140.78	SAE			s_USU#30C [20470]	ANDESITE, BASALTIC [20470]									VOL					WR [20470]	54.81	0.67		19.71				7.92	9.44	3	0.17		0.45	2.86	0.12
[20470]	CONVERGENT MARGIN	HONSHU ARC / NORTHEASTERN HONSHU ARC / HOKKAIDO / USU / SOMMA LAVA		42.57	42.57	140.78	140.78	SAE			s_USU#31 [20470]	ANDESITE, BASALTIC [20470]									VOL					WR [20470]	53.88	0.78		18.37				9.38	9.36	3.38	0.17		0.61	2.72	0.14
[20470]	CONVERGENT MARGIN	HONSHU ARC / NORTHEASTERN HONSHU ARC / HOKKAIDO / USU / SOMMA LAVA		42.57	42.57	140.78	140.78	SAE			s_USU#32 [20470]	ANDESITE, BASALTIC [20470]									VOL					WR [20470]	53.58	0.76		18.46				9.6	9.66	3.35	0.18		0.52	2.57	0.11
[20470]	CONVERGENT MARGIN	HONSHU ARC / NORTHEASTERN HONSHU ARC / HOKKAIDO / USU / SOMMA LAVA		42.57	42.57	140.78	140.78	SAE			s_USU#33 [20470]	ANDESITE, BASALTIC [20470]									VOL					WR [20470]	52.56	0.82		19.3				9.45	10.19	3.26	0.17		0.42	2.65	0.16
[20470]	CONVERGENT MARGIN	HONSHU ARC / NORTHEASTERN HONSHU ARC / HOKKAIDO / USU / SOMMA LAVA		42.57	42.57	140.78	140.78	SAE			s_USU#34 [20470]	ANDESITE, BASALTIC [20470]									VOL					WR [20470]	53.72	0.81		18.72				9.28	9.78	3.18	0.17		0.58	2.72	0.16
[20470]	CONVERGENT MARGIN	HONSHU ARC / NORTHEASTERN HONSHU ARC / HOKKAIDO / USU / SOMMA LAVA		42.57	42.57	140.78	140.78	SAE			s_USU#35 [20470]	ANDESITE, BASALTIC [20470]									VOL					WR [20470]	53.55	0.8		18.69				9.54	9.44	3.33	0.17		0.55	2.71	0.14
[20470]	CONVERGENT MARGIN	HONSHU ARC / NORTHEASTERN HONSHU ARC / HOKKAIDO / USU / SOMMA LAVA		42.57	42.57	140.78	140.78	SAE			s_USU#37A [20470]	ANDESITE, BASALTIC [20470]									VOL					WR [20470]	53.18	0.83		18.78				9.53	9.88	3.1	0.17		0.55	2.69	0.15
[20470]	CONVERGENT MARGIN	HONSHU ARC / NORTHEASTERN HONSHU ARC / HOKKAIDO / USU / SOMMA LAVA		42.57	42.57	140.78	140.78	SAE			s_USU#37B [20470]	ANDESITE, BASALTIC [20470]									VOL					WR [20470]	53.49	0.84		19.09				9.45	9.92	3.14	0.17		0.34	2.45	0.16
[20470]	CONVERGENT MARGIN	HONSHU ARC / NORTHEASTERN HONSHU ARC / HOKKAIDO / USU / SOMMA LAVA		42.57	42.57	140.78	140.78	SAE			s_USU#39A [20470]	ANDESITE, BASALTIC [20470]									VOL					WR [20470]	53.34	0.89		18.9				9.39	9.78	2.85	0.17		0.52	2.92	0.18
[20470]	CONVERGENT MARGIN	HONSHU ARC / NORTHEASTERN HONSHU ARC / HOKKAIDO / USU / SOMMA LAVA		42.57	42.57	140.78	140.78	SAE			s_USU#39B [20470]	ANDESITE, BASALTIC [20470]									VOL					WR [20470]	52.69	0.83		18.84				9.54	9.74	3.84	0.17		0.42	2.67	0.18
[20470]	CONVERGENT MARGIN	HONSHU ARC / NORTHEASTERN HONSHU ARC / HOKKAIDO / USU / SOMMA LAVA		42.57	42.57	140.78	140.78	SAE			s_USU#40A [20470]	ANDESITE, BASALTIC [20470]									VOL					WR [20470]	52.75	0.68		20.04				8.74	10.41	3.61	0.17		0.4	2.44	0.11
[20470]	CONVERGENT MARGIN	HONSHU ARC / NORTHEASTERN HONSHU ARC / HOKKAIDO / USU / SOMMA LAVA		42.57	42.57	140.78	140.78	SAE			s_USU#40B [20470]	ANDESITE, BASALTIC [20470]									VOL					WR [20470]	53.18	0.77		17.99				10.12	9.77	3.91	0.19		0.48	2.45	0.11
[20470]	CONVERGENT MARGIN	HONSHU ARC / NORTHEASTERN HONSHU ARC / HOKKAIDO / USU / SOMMA LAVA		42.57	42.57	140.78	140.78	SAE			s_USU#41 [20470]	ANDESITE, BASALTIC [20470]									VOL					WR [20470]	53.19	0.82		19.09				9.32	10.01	3.08	0.17		0.53	2.7	0.15
[20470]	CONVERGENT MARGIN	HONSHU ARC / NORTHEASTERN HONSHU ARC / HOKKAIDO / USU / SOMMA LAVA		42.57	42.57	140.78	140.78	SAE			s_USU#42 [20470]	ANDESITE, BASALTIC [20470]									VOL					WR [20470]	53.69	0.79		18.89				9.41	9.45	3.25	0.17		0.52	2.74	0.14
[20470]	CONVERGENT MARGIN	HONSHU ARC / NORTHEASTERN HONSHU ARC / HOKKAIDO / USU / SOMMA LAVA		42.57	42.57	140.78	140.78	SAE			s_USU#43 [20470]	ANDESITE, BASALTIC [20470]									VOL					WR [20470]	52.59	0.83		18.49				9.65	9.77	3.47	0.17		0.5	2.64	0.16
[20470]	CONVERGENT MARGIN	HONSHU ARC / NORTHEASTERN HONSHU ARC / HOKKAIDO / USU / SOMMA LAVA		42.57	42.57	140.78	140.78	SAE			s_USU#44A [20470]	ANDESITE, BASALTIC [20470]									VOL					WR [20470]	54.23	0.74		18.22				9.39	9.55	3.39	0.17		0.53	2.59	0.11
[20470]	CONVERGENT MARGIN	HONSHU ARC / NORTHEASTERN HONSHU ARC / HOKKAIDO / USU / SOMMA LAVA		42.57	42.57	140.78	140.78	SAE			s_USU#44B [20470]	ANDESITE, BASALTIC [20470]									VOL					WR [20470]	53.24	0.86		19.18				9.32	9.99	3.14	0.17		0.27	2.5	0.18
[20470]	CONVERGENT MARGIN	HONSHU ARC / NORTHEASTERN HONSHU ARC / HOKKAIDO / USU / SOMMA LAVA		42.57	42.57	140.78	140.78	SAE			s_USU#44C [20470]	ANDESITE, BASALTIC [20470]									VOL					WR [20470]	52.95	0.88		18.98				9.32	9.95	3.01	0.16		0.46	2.86	0.19
[20470]	CONVERGENT MARGIN	HONSHU ARC / NORTHEASTERN HONSHU ARC / HOKKAIDO / USU / SOMMA LAVA		42.57	42.57	140.78	140.78	SAE			s_USU#44D [20470]	ANDESITE, BASALTIC [20470]									VOL					WR [20470]	53.51	0.74		18.64				9.48	9.9	3.51	0.18		0.46	2.61	0.1
[20470]	CONVERGENT MARGIN	HONSHU ARC / NORTHEASTERN HONSHU ARC / HOKKAIDO / USU / SOMMA LAVA		42.57	42.57	140.78	140.78	SAE			s_USU#45A [20470]	ANDESITE, BASALTIC [20470]									VOL					WR [20470]	53.02	0.77		17.58				10.38	9.73	4.31	0.2		0.43	2.38	0.1
[20470]	CONVERGENT MARGIN	HONSHU ARC / NORTHEASTERN HONSHU ARC / HOKKAIDO / USU / SOMMA LAVA		42.57	42.57	140.78	140.78	SAE			s_USU#46 [20470]	ANDESITE, BASALTIC [20470]									VOL					WR [20470]	53.9	0.86		18.25				9.72	9.37	3.37	0.17		0.53	2.73	0.17
[20470]	CONVERGENT MARGIN	HONSHU ARC / NORTHEASTERN HONSHU ARC / HOKKAIDO / USU / SOMMA LAVA		42.57	42.57	140.78	140.78	SAE			s_USU#47A [20470]	ANDESITE, BASALTIC [20470]									VOL					WR [20470]	53	0.69		17.8				9.96	9.39	5.22	0.19		0.43	2.32	0.09
[20470]	CONVERGENT MARGIN	HONSHU ARC / NORTHEASTERN HONSHU ARC / HOKKAIDO / USU / SOMMA LAVA		42.57	42.57	140.78	140.78	SAE			s_USU#47B [20470]	BASALT [20470]									VOL					WR [20470]	51.06	0.64		18.77				9.98	10.39	5.74	0.19		0.27	2.03	0.07
[20470]	CONVERGENT MARGIN	HONSHU ARC / NORTHEASTERN HONSHU ARC / HOKKAIDO / USU / SOMMA LAVA		42.57	42.57	140.78	140.78	SAE			s_USU#47C [20470]	ANDESITE, BASALTIC [20470]									VOL					WR [20470]	53.04	0.68		17.91				9.78	9.5	5.11	0.19		0.43	2.34	0.09
[20470]	CONVERGENT MARGIN	HONSHU ARC / NORTHEASTERN HONSHU ARC / HOKKAIDO / USU / SOMMA LAVA		42.57	42.57	140.78	140.78	SAE			s_USU#47D [20470]	ANDESITE, BASALTIC [20470]									VOL					WR [20470]	53.59	0.69		17.94				9.77	9.31	4.92	0.19		0.4	2.25	0.09
[20470]	CONVERGENT MARGIN	HONSHU ARC / NORTHEASTERN HONSHU ARC / HOKKAIDO / USU / SOMMA LAVA		42.57	42.57	140.78	140.78	SAE			s_USU#49 [20470]	ANDESITE, BASALTIC [20470]									VOL					WR [20470]	53.44	0.85		18.76				9.51	9.56	3.07	0.17		0.51	2.87	0.17
[20470]	CONVERGENT MARGIN	HONSHU ARC / NORTHEASTERN HONSHU ARC / HOKKAIDO / USU / SOMMA LAVA		42.57	42.57	140.78	140.78	SAE			s_USU#50A [20470]	ANDESITE, BASALTIC [20470]									VOL					WR [20470]	54.31	0.8		16.8				10.58	8.53	4.18	0.2		0.53	2.68	0.11
[20470]	CONVERGENT MARGIN	HONSHU ARC / NORTHEASTERN HONSHU ARC / HOKKAIDO / USU / SOMMA LAVA		42.57	42.57	140.78	140.78	SAE			s_USU#50B [20470]	ANDESITE, BASALTIC [20470]									VOL					WR [20470]	54.26	0.8		17.01				10.57	8.57	4.07	0.2		0.48	2.56	0.11
[20470]	CONVERGENT MARGIN	HONSHU ARC / NORTHEASTERN HONSHU ARC / HOKKAIDO / USU / SOMMA LAVA		42.57	42.57	140.78	140.78	SAE			s_USU#51A [20470]	ANDESITE, BASALTIC [20470]									VOL					WR [20470]	53.39	0.81		18.74				9.47	9.63	3.24	0.17		0.51	2.67	0.15
[20470]	CONVERGENT MARGIN	HONSHU ARC / NORTHEASTERN HONSHU ARC / HOKKAIDO / USU / SOMMA LAVA		42.57	42.57	140.78	140.78	SAE			s_USU#51B [20470]	ANDESITE, BASALTIC [20470]									VOL					WR [20470]	52.89	0.82		19.12				9.51	9.78	3.21	0.17		0.46	2.66	0.14
[20470]	CONVERGENT MARGIN	HONSHU ARC / NORTHEASTERN HONSHU ARC / HOKKAIDO / USU / SOMMA LAVA		42.57	42.57	140.78	140.78	SAE			s_USU#51C [20470]	ANDESITE, BASALTIC [20470]									VOL					WR [20470]	53.3	0.83		18.6				9.51	9.38	3.61	0.18		0.47	2.71	0.16
[20470]	CONVERGENT MARGIN	HONSHU ARC / NORTHEASTERN HONSHU ARC / HOKKAIDO / USU / SOMMA LAVA		42.57	42.57	140.78	140.78	SAE			s_USU#51D [20470]	ANDESITE, BASALTIC [20470]									VOL					WR [20470]	53.3	0.83		18.06				9.67	9.52	3.91	0.18		0.48	2.69	0.16
[20470]	CONVERGENT MARGIN	HONSHU ARC / NORTHEASTERN HONSHU ARC / HOKKAIDO / USU / SOMMA LAVA		42.57	42.57	140.78	140.78	SAE			s_USU#52A [20470]	ANDESITE, BASALTIC [20470]									VOL					WR [20470]	54.21	0.75		17.78				9.62	9.51	3.6	0.18		0.56	2.54	0.11
[20470]	CONVERGENT MARGIN	HONSHU ARC / NORTHEASTERN HONSHU ARC / HOKKAIDO / USU / SOMMA LAVA		42.57	42.57	140.78	140.78	SAE			s_USU#52B [20470]	ANDESITE, BASALTIC [20470]									VOL					WR [20470]	54.42	0.75		17.75				9.61	9.42	3.56	0.18		0.55	2.56	0.11
[20470]	CONVERGENT MARGIN	HONSHU ARC / NORTHEASTERN HONSHU ARC / HOKKAIDO / USU / SOMMA LAVA		42.57	42.57	140.78	140.78	SAE			s_USU#54 [20470]	ANDESITE, BASALTIC [20470]									VOL					WR [20470]	54.54	0.72		18.58				9.04	9.31	3.47	0.17		0.58	2.52	0.1
[20470]	CONVERGENT MARGIN	HONSHU ARC / NORTHEASTERN HONSHU ARC / HOKKAIDO / USU / SOMMA LAVA		42.57	42.57	140.78	140.78	SAE			s_USU#57 [20470]	ANDESITE, BASALTIC [20470]									VOL					WR [20470]	53.31	0.72		17.05				10.23	9.15	5.2	0.2		0.45	2.39	0.1
[20470]	CONVERGENT MARGIN	HONSHU ARC / NORTHEASTERN HONSHU ARC / HOKKAIDO / USU / SOMMA LAVA		42.57	42.57	140.78	140.78	SAE			s_USU#58 [20470]	ANDESITE, BASALTIC [20470]									VOL					WR [20470]	52.95	0.84		18.42				9.69	9.77	3.44	0.18		0.5	2.59	0.15
[20470]	CONVERGENT MARGIN	HONSHU ARC / NORTHEASTERN HONSHU ARC / HOKKAIDO / USU / SOMMA LAVA		42.57	42.57	140.78	140.78	SAE			s_USU#59 [20470]	ANDESITE, BASALTIC [20470]									VOL					WR [20470]	53.71	0.84		18.05				9.35	9.4	3.53	0.17		0.53	2.8	0.16
[20470]	CONVERGENT MARGIN	HONSHU ARC / NORTHEASTERN HONSHU ARC / HOKKAIDO / USU / SOMMA LAVA		42.57	42.57	140.78	140.78	SAE			s_USU#60A [20470]	ANDESITE, BASALTIC [20470]									VOL					WR [20470]	53.63	0.86		18.25				9.41	9.36	3.47	0.17		0.52	2.91	0.16
[20470]	CONVERGENT MARGIN	HONSHU ARC / NORTHEASTERN HONSHU ARC / HOKKAIDO / USU / SOMMA LAVA		42.57	42.57	140.78	140.78	SAE			s_USU#60B [20470]	ANDESITE, BASALTIC [20470]									VOL					WR [20470]	52.81	0.76		17.71				10.12	9.76	4.03	0.19		0.47	2.47	0.09
[20470]	CONVERGENT MARGIN	HONSHU ARC / NORTHEASTERN HONSHU ARC / HOKKAIDO / USU / SOMMA LAVA		42.57	42.57	140.78	140.78	SAE			s_USU#61A [20470]	ANDESITE, BASALTIC [20470]									VOL					WR [20470]	53.22	0.79		17.54				10.32	9.31	4.12	0.2		0.38	2.47	0.1
[20470]	CONVERGENT MARGIN	HONSHU ARC / NORTHEASTERN HONSHU ARC / HOKKAIDO / USU / SOMMA LAVA		42.57	42.57	140.78	140.78	SAE			s_USU#61B [20470]	ANDESITE, BASALTIC [20470]									VOL					WR [20470]	53.26	0.81		17.38				10.4	9.31	3.93	0.2		0.44	2.56	0.1
[20470]	CONVERGENT MARGIN	HONSHU ARC / NORTHEASTERN HONSHU ARC / HOKKAIDO / USU / SOMMA LAVA		42.57	42.57	140.78	140.78	SAE			s_USU#62 [20470]	ANDESITE, BASALTIC [20470]									VOL					WR [20470]	53.91	0.81		17.12				10.49	8.77	4.11	0.2		0.53	2.54	0.11
[20470]	CONVERGENT MARGIN	HONSHU ARC / NORTHEASTERN HONSHU ARC / HOKKAIDO / USU / SOMMA LAVA		42.57	42.57	140.78	140.78	SAE			s_USU#63 [20470]	ANDESITE, BASALTIC [20470]									VOL					WR [20470]	53.06	0.79		17.5				10.37	9.33	4.19	0.2		0.45	2.54	0.1
[20470]	CONVERGENT MARGIN	HONSHU ARC / NORTHEASTERN HONSHU ARC / HOKKAIDO / USU / SOMMA LAVA		42.57	42.57	140.78	140.78	SAE			s_USU#65 [20470]	BASALT [20470]									VOL					WR [20470]	50.69	0.68		17.9				10.67	9.48	6.73	0.21		0.26	2.03	0.07
[20470]	CONVERGENT MARGIN	HONSHU ARC / NORTHEASTERN HONSHU ARC / HOKKAIDO / USU / SOMMA LAVA		42.57	42.57	140.78	140.78	SAE			s_USU#66 [20470]	BASALT [20470]									VOL					WR [20470]	49.89	0.65		19.09				10.49	10.34	6.84	0.2		0.2	1.74	0.07
[20470]	CONVERGENT MARGIN	HONSHU ARC / NORTHEASTERN HONSHU ARC / HOKKAIDO / USU / SOMMA LAVA		42.57	42.57	140.78	140.78	SAE			s_USU#67 [20470]	BASALT [20470]									VOL					WR [20470]	50.03	0.64		18.44				10.32	9.86	6.9	0.2		0.23	1.96	0.07
[20470]	CONVERGENT MARGIN	HONSHU ARC / NORTHEASTERN HONSHU ARC / HOKKAIDO / USU / SOMMA LAVA		42.57	42.57	140.78	140.78	SAE			s_USU#68 [20470]	ANDESITE, BASALTIC [20470]									VOL					WR [20470]	53.42	0.77		17.47				10.15	9.55	4.83	0.19		0.43	2.24	0.08
[20470]	CONVERGENT MARGIN	HONSHU ARC / NORTHEASTERN HONSHU ARC / HOKKAIDO / USU / SOMMA LAVA		42.57	42.57	140.78	140.78	SAE			s_USU#69 [20470]	ANDESITE, BASALTIC [20470]									VOL					WR [20470]	53.97	0.9		17.4				10.46	8.72	3.37	0.17		0.42	2.59	0.11
[20534]	CONVERGENT MARGIN	HONSHU ARC / NORTHEASTERN HONSHU ARC / HOKKAIDO / YOTEI		42.8	42.8	140.6	140.6	SAE			s_017-FUJI-SCO7 [20534]	NOT GIVEN [20534]									VOL					GL [20534]	67.64	0.96		14.9				5.07	3.98	1.49	0.16		1.69	5.26	0.48
[20534]	CONVERGENT MARGIN	HONSHU ARC / NORTHEASTERN HONSHU ARC / HOKKAIDO / YOTEI		42.8	42.8	140.6	140.6	SAE			s_017-FUJI-SCO8 [20534]	NOT GIVEN [20534]									VOL					GL [20534]	65.59	0.94		15.7				5.25	5.08	1.46	0.16		1.07	5.09	0.48
[20534]	CONVERGENT MARGIN	HONSHU ARC / NORTHEASTERN HONSHU ARC / HOKKAIDO / YOTEI		42.8	42.8	140.6	140.6	SAE			s_017-FUJI-SCO9 [20534]	NOT GIVEN [20534]									VOL					GL [20534]	65.18	0.97		15.89				5.18	4.97	1.24	0.14		1.63	5.05	0.97
[20534]	CONVERGENT MARGIN	HONSHU ARC / NORTHEASTERN HONSHU ARC / HOKKAIDO / YOTEI		42.8	42.8	140.6	140.6	SAE			s_017-FUJI-SCO10 [20534]	NOT GIVEN [20534]									VOL					GL [20534]	66.4	0.94		15.45				5.13	4.5	1.29	0.25		1.44	4.73	0.71
[20534]	CONVERGENT MARGIN	HONSHU ARC / NORTHEASTERN HONSHU ARC / HOKKAIDO / YOTEI		42.8	42.8	140.6	140.6	SAE			s_017-FUJI-SCO12 [20534]	NOT GIVEN [20534]									VOL					GL [20534]	64.01	0.85		16.09				5.55	5.25	1.83	0.18		1.11	5.02	0.61
[20534]	CONVERGENT MARGIN	HONSHU ARC / NORTHEASTERN HONSHU ARC / HOKKAIDO / YOTEI		42.8	42.8	140.6	140.6	SAE			s_017-FUJI-SCO14 [20534]	NOT GIVEN [20534]									VOL					GL [20534]	63.8	0.88		15.53				5.14	5.79	1.67	0.23		1.15	4.83	0.87
[20534]	CONVERGENT MARGIN	HONSHU ARC / NORTHEASTERN HONSHU ARC / HOKKAIDO / YOTEI		42.8	42.8	140.6	140.6	SAE			s_042-7-BRSCO1 [20534]	NOT GIVEN [20534]									VOL					GL [20534]	66.15	0.99		14.57				6.03	4	2.28	0.21		1.72	4.04	0.41
[20534]	CONVERGENT MARGIN	HONSHU ARC / NORTHEASTERN HONSHU ARC / HOKKAIDO / YOTEI		42.8	42.8	140.6	140.6	SAE			s_042-7-BRSCO5 [20534]	NOT GIVEN [20534]									VOL					GL [20534]	66.89	1.02		14.95				5.49	3.98	1.55	0.16		1.93	4.85	0.48
[20534]	CONVERGENT MARGIN	HONSHU ARC / NORTHEASTERN HONSHU ARC / HOKKAIDO / YOTEI		42.8	42.8	140.6	140.6	SAE			s_042-7-BRSCO14 [20534]	NOT GIVEN [20534]									VOL					GL [20534]	64.94	0.9		16.37				5.07	4.91	1.58	0.17		1.53	4.98	0.39
[20534]	CONVERGENT MARGIN	HONSHU ARC / NORTHEASTERN HONSHU ARC / HOKKAIDO / YOTEI		42.8	42.8	140.6	140.6	SAE			s_042-7-BLSCO1 [20534]	NOT GIVEN [20534]									VOL					GL [20534]	69.59	0.98		13.95				4.76	3.17	0.96	0.17		2.15	5.05	0.44
[20534]	CONVERGENT MARGIN	HONSHU ARC / NORTHEASTERN HONSHU ARC / HOKKAIDO / YOTEI		42.8	42.8	140.6	140.6	SAE			s_042-7-BLSCO5 [20534]	NOT GIVEN [20534]									VOL					GL [20534]	66.11	0.99		15.38				5.34	4.14	0.88	0.14		2.07	4.99	0.73
[20534]	CONVERGENT MARGIN	HONSHU ARC / NORTHEASTERN HONSHU ARC / HOKKAIDO / YOTEI		42.8	42.8	140.6	140.6	SAE			s_042-7-BLSCO7 [20534]	NOT GIVEN [20534]									VOL					GL [20534]	67.96	1.11		14.07				5.52	3.82	1.57	0.25		1.92	5.12	0.49
[20534]	CONVERGENT MARGIN	HONSHU ARC / NORTHEASTERN HONSHU ARC / HOKKAIDO / YOTEI		42.8	42.8	140.6	140.6	SAE			s_042-7-BLSCO11 [20534]	NOT GIVEN [20534]									VOL					GL [20534]	68.78	0.99		13.49				4.84	2.87	0.75	0.15		2.31	5.14	0.45
[20534]	CONVERGENT MARGIN	HONSHU ARC / NORTHEASTERN HONSHU ARC / HOKKAIDO / YOTEI		42.8	42.8	140.6	140.6	SAE			s_042-7-BLSCO15 [20534]	NOT GIVEN [20534]									VOL					GL [20534]	68.77	0.98		13.72				5	3.22	0.94	0.17		2.25	5.09	0.52
[20534]	CONVERGENT MARGIN	HONSHU ARC / NORTHEASTERN HONSHU ARC / HOKKAIDO / YOTEI		42.8	42.8	140.6	140.6	SAE			s_042-7-BLSCO16 [20534]	NOT GIVEN [20534]									VOL					GL [20534]	65.5	0.88		15.03				4.89	4.4	1.44	0.17		1.72	4.76	0.41
[20534]	CONVERGENT MARGIN	HONSHU ARC / NORTHEASTERN HONSHU ARC / HOKKAIDO / YOTEI		42.8	42.8	140.6	140.6	SAE			s_042-7-BLSCO17 [20534]	NOT GIVEN [20534]									VOL					GL [20534]	67.44	0.96		15.01				4.4	4.13	1.15	0.12		1.86	5.15	0.53
[20534]	CONVERGENT MARGIN	HONSHU ARC / NORTHEASTERN HONSHU ARC / HOKKAIDO / YOTEI		42.8	42.8	140.6	140.6	SAE			s_038-FUJI5 [20534]	NOT GIVEN [20534]									VOL					GL [20534]	65.58	0.95		14.97				5.31	3.79	0.96	0.17		2.1	4.5	0.44
[20534]	CONVERGENT MARGIN	HONSHU ARC / NORTHEASTERN HONSHU ARC / HOKKAIDO / YOTEI		42.8	42.8	140.6	140.6	SAE			s_038-FUJI6 [20534]	NOT GIVEN [20534]									VOL					GL [20534]	63.78	0.98		15.92				5.09	4.38	0.92	0.2		1.86	4.55	0.43
[20534]	CONVERGENT MARGIN	HONSHU ARC / NORTHEASTERN HONSHU ARC / HOKKAIDO / YOTEI		42.8	42.8	140.6	140.6	SAE			s_064-18-GL4 [20534]	NOT GIVEN [20534]									VOL					GL [20534]	73.42	0.65		12.73				2.55	1.71	0.16	0.12		2.52	5.18	0.09
[20534]	CONVERGENT MARGIN	HONSHU ARC / NORTHEASTERN HONSHU ARC / HOKKAIDO / YOTEI		42.8	42.8	140.6	140.6	SAE			s_064-18-GL6 [20534]	NOT GIVEN [20534]									VOL					GL [20534]	74.57	0.6		13.01				2.51	1.61	0.13	0.09		2.93	4.76	0.08
[20534]	CONVERGENT MARGIN	HONSHU ARC / NORTHEASTERN HONSHU ARC / HOKKAIDO / YOTEI		42.8	42.8	140.6	140.6	SAE			s_064-18-GL-37 [20534]	NOT GIVEN [20534]									VOL					GL [20534]	64.56	1.25		14.55				6.78	3.99	1.88	0.2		1.72	4.91	0.55
[20534]	CONVERGENT MARGIN	HONSHU ARC / NORTHEASTERN HONSHU ARC / HOKKAIDO / YOTEI		42.8	42.8	140.6	140.6	SAE			s_064-18-GL-38 [20534]	NOT GIVEN [20534]									VOL					GL [20534]	65.12	0.9		15.03				5.21	4.54	1.51	0.2		1.65	5.04	0.92
[20534]	CONVERGENT MARGIN	HONSHU ARC / NORTHEASTERN HONSHU ARC / HOKKAIDO / YOTEI		42.8	42.8	140.6	140.6	SAE			s_064-18-GL-39 [20534]	NOT GIVEN [20534]									VOL					GL [20534]	64.24	0.86		16.56				5.36	5.16	2.44	0.28		1.36	5.06	0.4
[20534]	CONVERGENT MARGIN	HONSHU ARC / NORTHEASTERN HONSHU ARC / HOKKAIDO / YOTEI		42.8	42.8	140.6	140.6	SAE			s_064-18-GL-40 [20534]	NOT GIVEN [20534]									VOL					GL [20534]	64.22	1.14		15.27				5.83	4.49	1.52	0.19		1.46	4.9	0.65
[20534]	CONVERGENT MARGIN	HONSHU ARC / NORTHEASTERN HONSHU ARC / HOKKAIDO / YOTEI		42.8	42.8	140.6	140.6	SAE			s_064-18-GL-42 [20534]	NOT GIVEN [20534]									VOL					GL [20534]	80.29	0.61		10.65				2.4	1.06	0.15	0.11		2.19	4.82	0.06
[20534]	CONVERGENT MARGIN	HONSHU ARC / NORTHEASTERN HONSHU ARC / HOKKAIDO / YOTEI		42.8	42.8	140.6	140.6	SAE			s_064-18-GL-43 [20534]	NOT GIVEN [20534]									VOL					GL [20534]	72.87	0.54		13.21				2.77	1.9	0.5	0.12		2.71	5.22	0.12
[20534]	CONVERGENT MARGIN	HONSHU ARC / NORTHEASTERN HONSHU ARC / HOKKAIDO / YOTEI		42.8	42.8	140.6	140.6	SAE			s_064-18-GL-45 [20534]	NOT GIVEN [20534]									VOL					GL [20534]	77.82	0.66		11.48				2.44	0.89	0.1	0.09		3.25	4.6	0.11
[20534]	CONVERGENT MARGIN	HONSHU ARC / NORTHEASTERN HONSHU ARC / HOKKAIDO / YOTEI		42.8	42.8	140.6	140.6	SAE			s_YO-GL-002-26-1 [20534]	NOT GIVEN [20534]									VOL					GL [20534]	67.13	0.7		15.51				4.16	3.99	1.12	0.15		1.47	5.74	0.23
[20534]	CONVERGENT MARGIN	HONSHU ARC / NORTHEASTERN HONSHU ARC / HOKKAIDO / YOTEI		42.8	42.8	140.6	140.6	SAE			s_YO-GL-002-26-2 [20534]	NOT GIVEN [20534]									VOL					GL [20534]	67.39	0.77		15.46				4.29	3.93	1.14	0.16		1.75	4.77	0.23
[20534]	CONVERGENT MARGIN	HONSHU ARC / NORTHEASTERN HONSHU ARC / HOKKAIDO / YOTEI		42.8	42.8	140.6	140.6	SAE			s_YO-GL-002-26-3 [20534]	NOT GIVEN [20534]									VOL					GL [20534]	67.47	0.77		14.67				5.23	3.39	1.47	0.23		1.71	5.03	0.23
[20534]	CONVERGENT MARGIN	HONSHU ARC / NORTHEASTERN HONSHU ARC / HOKKAIDO / YOTEI		42.8	42.8	140.6	140.6	SAE			s_YO-GL-002-26-4 [20534]	NOT GIVEN [20534]									VOL					GL [20534]	68.03	0.67		16.01				4.24	3.84	1.07	0.17		1.42	5.52	0.27
[20534]	CONVERGENT MARGIN	HONSHU ARC / NORTHEASTERN HONSHU ARC / HOKKAIDO / YOTEI		42.8	42.8	140.6	140.6	SAE			s_YO-GL-002-26-5 [20534]	NOT GIVEN [20534]									VOL					GL [20534]	67.61	0.64		16.69				3.85	4.47	1.05	0.16		1.2	5.72	0.11
[20534]	CONVERGENT MARGIN	HONSHU ARC / NORTHEASTERN HONSHU ARC / HOKKAIDO / YOTEI		42.8	42.8	140.6	140.6	SAE			s_YO-GL-064-17-1 [20534]	NOT GIVEN [20534]									VOL					GL [20534]	69.33	0.77		15.76				4.65	3.53	1.33	0.2		1.79	5.05	0.21
[20534]	CONVERGENT MARGIN	HONSHU ARC / NORTHEASTERN HONSHU ARC / HOKKAIDO / YOTEI		42.8	42.8	140.6	140.6	SAE			s_YO-GL-064-17-3 [20534]	NOT GIVEN [20534]									VOL					GL [20534]	70.34	0.66		15.24				4.04	4.06	1.1	0.15		0.9	5.39	0.16
[20534]	CONVERGENT MARGIN	HONSHU ARC / NORTHEASTERN HONSHU ARC / HOKKAIDO / YOTEI		42.8	42.8	140.6	140.6	SAE			s_YO-GL-064-17-4 [20534]	NOT GIVEN [20534]									VOL					GL [20534]	68.56	0.7		15.73				4.51	3.71	1.23	0.19		1.57	5.44	0.22
[20534]	CONVERGENT MARGIN	HONSHU ARC / NORTHEASTERN HONSHU ARC / HOKKAIDO / YOTEI		42.8	42.8	140.6	140.6	SAE			s_YO-GL-064-17-5 [20534]	NOT GIVEN [20534]									VOL					GL [20534]	67.59	0.79		15.32				5	3.57	1.33	0.23		1.82	5.29	0.25
[20534]	CONVERGENT MARGIN	HONSHU ARC / NORTHEASTERN HONSHU ARC / HOKKAIDO / YOTEI		42.8	42.8	140.6	140.6	SAE			s_YO-GL-064-17-6 [20534]	NOT GIVEN [20534]									VOL					GL [20534]	69.32	0.72		16.21				3.93	4.13	1.04	0.19		1.18	6.15	0.27
[20534]	CONVERGENT MARGIN	HONSHU ARC / NORTHEASTERN HONSHU ARC / HOKKAIDO / YOTEI		42.8	42.8	140.6	140.6	SAE			s_064-16-GL1 [20534]	NOT GIVEN [20534]									VOL					GL [20534]	62.83	0.81		14.65				5.76	4.54	2.25	0.22		1.72	3.84	0.42
[20534]	CONVERGENT MARGIN	HONSHU ARC / NORTHEASTERN HONSHU ARC / HOKKAIDO / YOTEI		42.8	42.8	140.6	140.6	SAE			s_064-16-GL7 [20534]	NOT GIVEN [20534]									VOL					GL [20534]	64.52	1.06		14.69				5.33	3.97	1.1	0.17		2	4.35	0.35
[20534]	CONVERGENT MARGIN	HONSHU ARC / NORTHEASTERN HONSHU ARC / HOKKAIDO / YOTEI		42.8	42.8	140.6	140.6	SAE			s_064-15-GL2 [20534]	NOT GIVEN [20534]									VOL					GL [20534]	70.7	0.45		13.1				3.34	2.21	0.42	0.16		2.07	4.2	0.07
[20534]	CONVERGENT MARGIN	HONSHU ARC / NORTHEASTERN HONSHU ARC / HOKKAIDO / YOTEI		42.8	42.8	140.6	140.6	SAE			s_064-15-GL6 [20534]	NOT GIVEN [20534]									VOL					GL [20534]	70.46	0.47		13.72				3.33	2.54	0.44	0.13		1.99	4.54	0.11
[20534]	CONVERGENT MARGIN	HONSHU ARC / NORTHEASTERN HONSHU ARC / HOKKAIDO / YOTEI		42.8	42.8	140.6	140.6	SAE			s_064-15-GL8 [20534]	NOT GIVEN [20534]									VOL					GL [20534]	71.83	0.43		14.03				3.35	2.5	0.43	0.08		2.09	4.59	0.1
[20534]	CONVERGENT MARGIN	HONSHU ARC / NORTHEASTERN HONSHU ARC / HOKKAIDO / YOTEI		42.8	42.8	140.6	140.6	SAE			s_064-15-GL9 [20534]	NOT GIVEN [20534]									VOL					GL [20534]	68.3	0.36		16.23				2.84	3.71	0.29	0.11		1.7	5.05	0.09
[20534]	CONVERGENT MARGIN	HONSHU ARC / NORTHEASTERN HONSHU ARC / HOKKAIDO / YOTEI		42.8	42.8	140.6	140.6	SAE			s_064-15-GL10 [20534]	NOT GIVEN [20534]									VOL					GL [20534]	69.53	0.51		12.26				3.5	1.84	0.37	0.16		2.21	4.09	0.08
[20534]	CONVERGENT MARGIN	HONSHU ARC / NORTHEASTERN HONSHU ARC / HOKKAIDO / YOTEI		42.8	42.8	140.6	140.6	SAE			s_064-15-GL11 [20534]	NOT GIVEN [20534]									VOL					GL [20534]	70.79	0.5		12.94				3.51	2.12	0.43	0.11		2.17	4.29	0.09
[20534]	CONVERGENT MARGIN	HONSHU ARC / NORTHEASTERN HONSHU ARC / HOKKAIDO / YOTEI		42.8	42.8	140.6	140.6	SAE			s_064-15-GL12 [20534]	NOT GIVEN [20534]									VOL					GL [20534]	70.91	0.41		14.02				3.36	2.54	0.38	0.09		2.06	4.24	0.09
[20534]	CONVERGENT MARGIN	HONSHU ARC / NORTHEASTERN HONSHU ARC / HOKKAIDO / YOTEI		42.8	42.8	140.6	140.6	SAE			s_YO-GL-090901-1-24-GP [20534]	NOT GIVEN [20534]									VOL					GL [20534]	68.97	0.5		17.01				2.41	3.98	0.32	0.12		1.52	6.36	0.13
[20534]	CONVERGENT MARGIN	HONSHU ARC / NORTHEASTERN HONSHU ARC / HOKKAIDO / YOTEI		42.8	42.8	140.6	140.6	SAE			s_YO-GL-090901-1-24-GP [20534]	NOT GIVEN [20534]									VOL					GL [20534]	75.81	0.82		12.14				3.49	1.75	0.38	0.15		2.63	4.8	0.22
[20534]	CONVERGENT MARGIN	HONSHU ARC / NORTHEASTERN HONSHU ARC / HOKKAIDO / YOTEI		42.8	42.8	140.6	140.6	SAE			s_YO-GL-090901-1-24-GP [20534]	NOT GIVEN [20534]									VOL					GL [20534]	72.66	0.8		12.87				4.3	2.32	1.03	0.22		2.39	5	0.18
[20534]	CONVERGENT MARGIN	HONSHU ARC / NORTHEASTERN HONSHU ARC / HOKKAIDO / YOTEI		42.8	42.8	140.6	140.6	SAE			s_YO-GL-090901-1-24-GP [20534]	NOT GIVEN [20534]									VOL					GL [20534]	75.2	0.84		12.29				3.35	1.94	0.36	0.12		2.53	5.02	0.18
[20534]	CONVERGENT MARGIN	HONSHU ARC / NORTHEASTERN HONSHU ARC / HOKKAIDO / YOTEI		42.8	42.8	140.6	140.6	SAE			s_YO-GL-090901-1-24-GP [20534]	NOT GIVEN [20534]									VOL					GL [20534]	72.39	0.66		14.32				2.84	2.84	0.29	0.15		2.16	5.44	0.19
[20534]	CONVERGENT MARGIN	HONSHU ARC / NORTHEASTERN HONSHU ARC / HOKKAIDO / YOTEI		42.8	42.8	140.6	140.6	SAE			s_YO-GL-090901-1-24-GP [20534]	NOT GIVEN [20534]									VOL					GL [20534]	73.59	0.78		13.12				3.16	2.13	0.32	0.1		2.44	4.8	0.14
[20534]	CONVERGENT MARGIN	HONSHU ARC / NORTHEASTERN HONSHU ARC / HOKKAIDO / YOTEI		42.8	42.8	140.6	140.6	SAE			s_YO-GL-090901-1-24-WP [20534]	NOT GIVEN [20534]									VOL					GL [20534]	75.84	0.45		13.56				2.06	2.02	0.16	0.04		2.09	5.15	0.04
[20534]	CONVERGENT MARGIN	HONSHU ARC / NORTHEASTERN HONSHU ARC / HOKKAIDO / YOTEI		42.8	42.8	140.6	140.6	SAE			s_YO-GL-090901-1-24-WP [20534]	NOT GIVEN [20534]									VOL					GL [20534]	68.91	0.37		17.89				1.65	4.18	0.15	0.03		1.6	6.08	0.09
[20534]	CONVERGENT MARGIN	HONSHU ARC / NORTHEASTERN HONSHU ARC / HOKKAIDO / YOTEI		42.8	42.8	140.6	140.6	SAE			s_YO-GL-090901-1-24-WP [20534]	NOT GIVEN [20534]									VOL					GL [20534]	74.36	0.5		13.91				2.14	2.13	0.18	0.13		2.3	5.41	0.07
[20534]	CONVERGENT MARGIN	HONSHU ARC / NORTHEASTERN HONSHU ARC / HOKKAIDO / YOTEI		42.8	42.8	140.6	140.6	SAE			s_YO-GL-090901-1-24-WP [20534]	NOT GIVEN [20534]									VOL					GL [20534]	76.8	0.58		12.51				2.66	1.49	0.19	0.1		2.61	4.87	0.07
[20534]	CONVERGENT MARGIN	HONSHU ARC / NORTHEASTERN HONSHU ARC / HOKKAIDO / YOTEI		42.8	42.8	140.6	140.6	SAE			s_YO-GL-090901-1-24-WP [20534]	NOT GIVEN [20534]									VOL					GL [20534]	78	0.64		11.35				2.53	0.94	0.21	0.13		3.05	4.8	0.01
[20534]	CONVERGENT MARGIN	HONSHU ARC / NORTHEASTERN HONSHU ARC / HOKKAIDO / YOTEI		42.8	42.8	140.6	140.6	SAE			s_064-14-1-ML1 [20534]	NOT GIVEN [20534]									VOL					GL [20534]	74.25	0.73		10.98				3.15	1.39	0.35	0.16		2.36	4.67	0.09
[20534]	CONVERGENT MARGIN	HONSHU ARC / NORTHEASTERN HONSHU ARC / HOKKAIDO / YOTEI		42.8	42.8	140.6	140.6	SAE			s_064-14-1-ML5 [20534]	NOT GIVEN [20534]									VOL					GL [20534]	73.74	0.66		13.24				2.74	2.21	0.28	0.11		1.98	5.13	0.11
[20534]	CONVERGENT MARGIN	HONSHU ARC / NORTHEASTERN HONSHU ARC / HOKKAIDO / YOTEI		42.8	42.8	140.6	140.6	SAE			s_064-14-2-ML1 [20534]	NOT GIVEN [20534]									VOL					GL [20534]	75	0.74		11.3				3.4	1.34	0.37	0.13		2.33	4.73	0.1
[20534]	CONVERGENT MARGIN	HONSHU ARC / NORTHEASTERN HONSHU ARC / HOKKAIDO / YOTEI		42.8	42.8	140.6	140.6	SAE			s_064-14-2-ML2 [20534]	NOT GIVEN [20534]									VOL					GL [20534]	74.13	0.7		12.64				3.2	1.89	0.31	0.12		2.13	4.77	0.12
[20534]	CONVERGENT MARGIN	HONSHU ARC / NORTHEASTERN HONSHU ARC / HOKKAIDO / YOTEI		42.8	42.8	140.6	140.6	SAE			s_064-14-2-ML3 [20534]	NOT GIVEN [20534]									VOL					GL [20534]	74.93	0.77		12.18				3.75	1.89	0.39	0.15		2.18	4.81	0.11
[20534]	CONVERGENT MARGIN	HONSHU ARC / NORTHEASTERN HONSHU ARC / HOKKAIDO / YOTEI		42.8	42.8	140.6	140.6	SAE			s_064-14-2-ML4 [20534]	NOT GIVEN [20534]									VOL					GL [20534]	75.43	0.82		11.23				3.46	1.32	0.32	0.12		2.4	4.62	0.1
[20534]	CONVERGENT MARGIN	HONSHU ARC / NORTHEASTERN HONSHU ARC / HOKKAIDO / YOTEI		42.8	42.8	140.6	140.6	SAE			s_064-14-2-ML5 [20534]	NOT GIVEN [20534]									VOL					GL [20534]	73.88	0.79		11.34				3.61	1.75	0.44	0.1		2.34	4.27	0.23
[20534]	CONVERGENT MARGIN	HONSHU ARC / NORTHEASTERN HONSHU ARC / HOKKAIDO / YOTEI		42.8	42.8	140.6	140.6	SAE			s_064-14-3-ML1 [20534]	NOT GIVEN [20534]									VOL					GL [20534]	73.65	0.77		11.33				3.43	1.44	0.38	0.11		2.35	4.69	0.1
[20534]	CONVERGENT MARGIN	HONSHU ARC / NORTHEASTERN HONSHU ARC / HOKKAIDO / YOTEI		42.8	42.8	140.6	140.6	SAE			s_064-14-3-ML2 [20534]	NOT GIVEN [20534]									VOL					GL [20534]	75.96	0.76		11.07				3.58	1.45	0.43	0.14		2.35	4.49	0.14
[20534]	CONVERGENT MARGIN	HONSHU ARC / NORTHEASTERN HONSHU ARC / HOKKAIDO / YOTEI		42.8	42.8	140.6	140.6	SAE			s_064-14-3-ML3 [20534]	NOT GIVEN [20534]									VOL					GL [20534]	74.73	0.68		11.59				3.37	1.51	0.4	0.14		2.37	4.62	0.11
[20534]	CONVERGENT MARGIN	HONSHU ARC / NORTHEASTERN HONSHU ARC / HOKKAIDO / YOTEI		42.8	42.8	140.6	140.6	SAE			s_064-14-3-ML4 [20534]	NOT GIVEN [20534]									VOL					GL [20534]	73.91	0.71		13.02				3.12	2.16	0.36	0.12		2.06	4.92	0.09
[20534]	CONVERGENT MARGIN	HONSHU ARC / NORTHEASTERN HONSHU ARC / HOKKAIDO / YOTEI		42.8	42.8	140.6	140.6	SAE			s_064-14-6-ML1 [20534]	NOT GIVEN [20534]									VOL					GL [20534]	70.62	0.97		12.36				5.01	2.43	0.98	0.22		2.08	4.67	0.21
[20534]	CONVERGENT MARGIN	HONSHU ARC / NORTHEASTERN HONSHU ARC / HOKKAIDO / YOTEI		42.8	42.8	140.6	140.6	SAE			s_064-14-6-ML2 [20534]	NOT GIVEN [20534]									VOL					GL [20534]	73.86	0.87		11.35				3.96	1.75	0.49	0.16		2.41	4.72	0.18
[20534]	CONVERGENT MARGIN	HONSHU ARC / NORTHEASTERN HONSHU ARC / HOKKAIDO / YOTEI		42.8	42.8	140.6	140.6	SAE			s_064-14-8-ML1 [20534]	NOT GIVEN [20534]									VOL					GL [20534]	74.63	0.72		11.56				3.28	1.5	0.34	0.13		2.34	4.81	0.11
[20534]	CONVERGENT MARGIN	HONSHU ARC / NORTHEASTERN HONSHU ARC / HOKKAIDO / YOTEI		42.8	42.8	140.6	140.6	SAE			s_064-14-8-ML3 [20534]	NOT GIVEN [20534]									VOL					GL [20534]	75.03	0.78		11.07				3.3	1.45	0.38	0.12		2.36	4.78	0.11
[20534]	CONVERGENT MARGIN	HONSHU ARC / NORTHEASTERN HONSHU ARC / HOKKAIDO / YOTEI		42.8	42.8	140.6	140.6	SAE			s_064-14-8-ML4 [20534]	NOT GIVEN [20534]									VOL					GL [20534]	75.48	0.75		11.11				3.19	1.27	0.37	0.12		2.43	4.5	0.15
[20534]	CONVERGENT MARGIN	HONSHU ARC / NORTHEASTERN HONSHU ARC / HOKKAIDO / YOTEI		42.8	42.8	140.6	140.6	SAE			s_064-14-8-ML5 [20534]	NOT GIVEN [20534]									VOL					GL [20534]	75.02	0.75		11.13				3.4	1.37	0.41	0.16		2.43	4.74	0.13
[20534]	CONVERGENT MARGIN	HONSHU ARC / NORTHEASTERN HONSHU ARC / HOKKAIDO / YOTEI		42.8	42.8	140.6	140.6	SAE			s_064-11-YE-GL1 [20534]	NOT GIVEN [20534]									VOL					GL [20534]	68.75	0.45		14.45				3.06	2.67	0.28	0.08		1.67	4.78	0.09
[20534]	CONVERGENT MARGIN	HONSHU ARC / NORTHEASTERN HONSHU ARC / HOKKAIDO / YOTEI		42.8	42.8	140.6	140.6	SAE			s_064-11-YE-GL3 [20534]	NOT GIVEN [20534]									VOL					GL [20534]	67.36	0.48		14.78				3.48	2.52	0.48	0.15		1.68	4.92	0.09
[20534]	CONVERGENT MARGIN	HONSHU ARC / NORTHEASTERN HONSHU ARC / HOKKAIDO / YOTEI		42.8	42.8	140.6	140.6	SAE			s_064-11-GR-GL1 [20534]	NOT GIVEN [20534]									VOL					GL [20534]	69.25	0.46		12.57				3.47	1.97	0.61	0.22		2.14	4.05	0.11
[20534]	CONVERGENT MARGIN	HONSHU ARC / NORTHEASTERN HONSHU ARC / HOKKAIDO / YOTEI		42.8	42.8	140.6	140.6	SAE			s_064-11-GR-GL2 [20534]	NOT GIVEN [20534]									VOL					GL [20534]	66.68	0.55		16.2				3.33	2.96	0.23	0.12		1.6	5.46	0.14
[20534]	CONVERGENT MARGIN	HONSHU ARC / NORTHEASTERN HONSHU ARC / HOKKAIDO / YOTEI		42.8	42.8	140.6	140.6	SAE			s_064-11-GR-GL3 [20534]	NOT GIVEN [20534]									VOL					GL [20534]	71.11	0.46		12.05				3.49	1.72	0.52	0.23		2.29	3.72	0.12
[20534]	CONVERGENT MARGIN	HONSHU ARC / NORTHEASTERN HONSHU ARC / HOKKAIDO / YOTEI		42.8	42.8	140.6	140.6	SAE			s_064-11-GR-GL4 [20534]	NOT GIVEN [20534]									VOL					GL [20534]	70.41	0.46		12				3.25	1.63	0.52	0.2		2.24	4.14	0.13
[20534]	CONVERGENT MARGIN	HONSHU ARC / NORTHEASTERN HONSHU ARC / HOKKAIDO / YOTEI		42.8	42.8	140.6	140.6	SAE			s_064-11-GR-GL5 [20534]	NOT GIVEN [20534]									VOL					GL [20534]	69.11	0.35		15.4				2.25	2.71	0.18	0.12		1.76	5.25	0.1
[20534]	CONVERGENT MARGIN	HONSHU ARC / NORTHEASTERN HONSHU ARC / HOKKAIDO / YOTEI		42.8	42.8	140.6	140.6	SAE			s_064-11-GR-GL6 [20534]	NOT GIVEN [20534]									VOL					GL [20534]	70.45	0.41		13.87				2.67	2.14	0.3	0.14		2.05	4.48	0.13
[20534]	CONVERGENT MARGIN	HONSHU ARC / NORTHEASTERN HONSHU ARC / HOKKAIDO / YOTEI		42.8	42.8	140.6	140.6	SAE			s_064-9-1-ML1 [20534]	NOT GIVEN [20534]									VOL					GL [20534]	64.76	1.29		12.37				5.94	3.55	0.97	0.22		1.88	4.5	0.36
[20534]	CONVERGENT MARGIN	HONSHU ARC / NORTHEASTERN HONSHU ARC / HOKKAIDO / YOTEI		42.8	42.8	140.6	140.6	SAE			s_064-9-1-ML2 [20534]	NOT GIVEN [20534]									VOL					GL [20534]	68.67	1.32		12.32				6.47	3.08	1.09	0.19		2.1	4.51	0.4
[20534]	CONVERGENT MARGIN	HONSHU ARC / NORTHEASTERN HONSHU ARC / HOKKAIDO / YOTEI		42.8	42.8	140.6	140.6	SAE			s_064-9-1-ML3 [20534]	NOT GIVEN [20534]									VOL					GL [20534]	66.08	1.16		14.05				5.85	4.16	0.96	0.18		1.76	4.55	0.38
[20534]	CONVERGENT MARGIN	HONSHU ARC / NORTHEASTERN HONSHU ARC / HOKKAIDO / YOTEI		42.8	42.8	140.6	140.6	SAE			s_064-9-1-ML4 [20534]	NOT GIVEN [20534]									VOL					GL [20534]	67.78	1.29		11.68				6.65	3.27	1.08	0.27		1.99	3.83	0.43
[20534]	CONVERGENT MARGIN	HONSHU ARC / NORTHEASTERN HONSHU ARC / HOKKAIDO / YOTEI		42.8	42.8	140.6	140.6	SAE			s_064-9-1-ML5 [20534]	NOT GIVEN [20534]									VOL					GL [20534]	68.62	1.27		11.92				6.57	3.31	1.29	0.28		2	4.2	0.44
[20534]	CONVERGENT MARGIN	HONSHU ARC / NORTHEASTERN HONSHU ARC / HOKKAIDO / YOTEI		42.8	42.8	140.6	140.6	SAE			s_064-9-2-ML2 [20534]	NOT GIVEN [20534]									VOL					GL [20534]	69.12	1.24		12.05				6.49	3.04	1	0.18		2.05	4.47	0.39
[20534]	CONVERGENT MARGIN	HONSHU ARC / NORTHEASTERN HONSHU ARC / HOKKAIDO / YOTEI		42.8	42.8	140.6	140.6	SAE			s_064-9-2-ML3 [20534]	NOT GIVEN [20534]									VOL					GL [20534]	67.39	1.19		12.95				5.94	3.71	0.92	0.17		1.77	4.84	0.42
[20534]	CONVERGENT MARGIN	HONSHU ARC / NORTHEASTERN HONSHU ARC / HOKKAIDO / YOTEI		42.8	42.8	140.6	140.6	SAE			s_064-9-2-ML4 [20534]	NOT GIVEN [20534]									VOL					GL [20534]	67.52	1.1		13.39				6.12	3.7	1.02	0.2		1.82	4.84	0.35
[20534]	CONVERGENT MARGIN	HONSHU ARC / NORTHEASTERN HONSHU ARC / HOKKAIDO / YOTEI		42.8	42.8	140.6	140.6	SAE			s_064-9-2-ML5 [20534]	NOT GIVEN [20534]									VOL					GL [20534]	67.85	1.28		11.94				6.6	3.12	0.98	0.21		2.2	4.15	0.57
[20534]	CONVERGENT MARGIN	HONSHU ARC / NORTHEASTERN HONSHU ARC / HOKKAIDO / YOTEI		42.8	42.8	140.6	140.6	SAE			s_064-9-3-ML1 [20534]	NOT GIVEN [20534]									VOL					GL [20534]	66.57	1.34		11.84				6.81	3.29	1.1	0.26		1.2	5.71	0.38
[20534]	CONVERGENT MARGIN	HONSHU ARC / NORTHEASTERN HONSHU ARC / HOKKAIDO / YOTEI		42.8	42.8	140.6	140.6	SAE			s_064-9-3-ML2 [20534]	NOT GIVEN [20534]									VOL					GL [20534]	68.92	1.23		11.89				6.26	2.72	0.98	0.2		2.23	5.02	0.35
[20534]	CONVERGENT MARGIN	HONSHU ARC / NORTHEASTERN HONSHU ARC / HOKKAIDO / YOTEI		42.8	42.8	140.6	140.6	SAE			s_064-9-3-ML3 [20534]	NOT GIVEN [20534]									VOL					GL [20534]	68.93	0.85		13.72				4	4.09	0.52	0.1		1.52	5.42	0.63
[20534]	CONVERGENT MARGIN	HONSHU ARC / NORTHEASTERN HONSHU ARC / HOKKAIDO / YOTEI		42.8	42.8	140.6	140.6	SAE			s_064-9-3-ML4 [20534]	NOT GIVEN [20534]									VOL					GL [20534]	69.01	1.29		11.65				6.44	2.93	0.94	0.2		1.42	5.68	0.38
[20534]	CONVERGENT MARGIN	HONSHU ARC / NORTHEASTERN HONSHU ARC / HOKKAIDO / YOTEI		42.8	42.8	140.6	140.6	SAE			s_064-9-3-ML5 [20534]	NOT GIVEN [20534]									VOL					GL [20534]	68.29	1.26		11.88				6.21	2.89	0.88	0.17		1.87	5.19	0.46
[20534]	CONVERGENT MARGIN	HONSHU ARC / NORTHEASTERN HONSHU ARC / HOKKAIDO / YOTEI		42.8	42.8	140.6	140.6	SAE			s_064-9-4-ML1 [20534]	NOT GIVEN [20534]									VOL					GL [20534]	66.71	1.23		12.67				6.25	3.49	0.62	0.2		1.52	5.5	0.38
[20534]	CONVERGENT MARGIN	HONSHU ARC / NORTHEASTERN HONSHU ARC / HOKKAIDO / YOTEI		42.8	42.8	140.6	140.6	SAE			s_064-9-4-ML3 [20534]	NOT GIVEN [20534]									VOL					GL [20534]	68.59	1.18		12.19				6.32	3.36	0.64	0.24		1.57	5.36	0.45
[20534]	CONVERGENT MARGIN	HONSHU ARC / NORTHEASTERN HONSHU ARC / HOKKAIDO / YOTEI		42.8	42.8	140.6	140.6	SAE			s_064-9-4-ML4 [20534]	NOT GIVEN [20534]									VOL					GL [20534]	68.99	1.34		11.68				6.87	3.03	0.65	0.17		1.43	5.44	0.45
[20534]	CONVERGENT MARGIN	HONSHU ARC / NORTHEASTERN HONSHU ARC / HOKKAIDO / YOTEI		42.8	42.8	140.6	140.6	SAE			s_064-9-4-ML5 [20534]	NOT GIVEN [20534]									VOL					GL [20534]	69.41	1.37		11.61				7	3.02	1.14	0.29		1.55	5.13	0.46
[20534]	CONVERGENT MARGIN	HONSHU ARC / NORTHEASTERN HONSHU ARC / HOKKAIDO / YOTEI		42.8	42.8	140.6	140.6	SAE			s_064-9-5-ML1 [20534]	NOT GIVEN [20534]									VOL					GL [20534]	66.18	1.25		12.66				6.79	3.72	1.3	0.25		1.68	4.02	0.6
[20534]	CONVERGENT MARGIN	HONSHU ARC / NORTHEASTERN HONSHU ARC / HOKKAIDO / YOTEI		42.8	42.8	140.6	140.6	SAE			s_064-9-5-ML2 [20534]	NOT GIVEN [20534]									VOL					GL [20534]	67.88	1.23		12.27				6.25	3.49	1.04	0.21		1.79	4.57	0.44
[20534]	CONVERGENT MARGIN	HONSHU ARC / NORTHEASTERN HONSHU ARC / HOKKAIDO / YOTEI		42.8	42.8	140.6	140.6	SAE			s_064-9-5-ML4 [20534]	NOT GIVEN [20534]									VOL					GL [20534]	65.62	1.24		11.98				6.45	3.06	1.08	0.21		1.93	4.33	0.44
[20534]	CONVERGENT MARGIN	HONSHU ARC / NORTHEASTERN HONSHU ARC / HOKKAIDO / YOTEI		42.8	42.8	140.6	140.6	SAE			s_064-9-5-ML5 [20534]	NOT GIVEN [20534]									VOL					GL [20534]	68.12	1.26		12.26				6.17	3.44	1.14	0.24		1.92	4.62	0.38
[20534]	CONVERGENT MARGIN	HONSHU ARC / NORTHEASTERN HONSHU ARC / HOKKAIDO / YOTEI		42.8	42.8	140.6	140.6	SAE			s_064-9-6-ML1 [20534]	NOT GIVEN [20534]									VOL					GL [20534]	67.78	1.32		11.7				5.96	2.58	0.72	0.17		1.72	5.27	0.38
[20534]	CONVERGENT MARGIN	HONSHU ARC / NORTHEASTERN HONSHU ARC / HOKKAIDO / YOTEI		42.8	42.8	140.6	140.6	SAE			s_064-9-6-ML2 [20534]	NOT GIVEN [20534]									VOL					GL [20534]	69.25	1.32		11.48				6.28	2.98	0.94	0.19		1.6	4.89	0.37
[20534]	CONVERGENT MARGIN	HONSHU ARC / NORTHEASTERN HONSHU ARC / HOKKAIDO / YOTEI		42.8	42.8	140.6	140.6	SAE			s_064-9-6-ML5 [20534]	NOT GIVEN [20534]									VOL					GL [20534]	67.9	1.13		13.4				4.99	3.14	0.64	0.18		1.74	5.18	0.31
[20534]	CONVERGENT MARGIN	HONSHU ARC / NORTHEASTERN HONSHU ARC / HOKKAIDO / YOTEI		42.8	42.8	140.6	140.6	SAE			s_064-9-6-ML6 [20534]	NOT GIVEN [20534]									VOL					GL [20534]	68.63	1.19		11.53				6.26	2.99	0.96	0.18		1.53	5.08	0.39
[20534]	CONVERGENT MARGIN	HONSHU ARC / NORTHEASTERN HONSHU ARC / HOKKAIDO / YOTEI		42.8	42.8	140.6	140.6	SAE			s_064-9-7-ML3 [20534]	NOT GIVEN [20534]									VOL					GL [20534]	65.69	1.09		13.23				7.13	3.98	2.39	0.32		1.96	4.5	0.28
[20534]	CONVERGENT MARGIN	HONSHU ARC / NORTHEASTERN HONSHU ARC / HOKKAIDO / YOTEI		42.8	42.8	140.6	140.6	SAE			s_064-6-GL4 [20534]	NOT GIVEN [20534]									VOL					GL [20534]	61.48	1.3		16.39				7.21	6.08	1.51	0.21		1.2	4.78	0.63
[20534]	CONVERGENT MARGIN	HONSHU ARC / NORTHEASTERN HONSHU ARC / HOKKAIDO / YOTEI		42.8	42.8	140.6	140.6	SAE			s_064-6-GL6 [20534]	NOT GIVEN [20534]									VOL					GL [20534]	61.91	1.45		13.7				8.88	5.62	2.63	0.3		1.29	4.37	0.62
[20534]	CONVERGENT MARGIN	HONSHU ARC / NORTHEASTERN HONSHU ARC / HOKKAIDO / YOTEI		42.8	42.8	140.6	140.6	SAE			s_064-6-GL7 [20534]	NOT GIVEN [20534]									VOL					GL [20534]	61.52	1.19		17				6.71	6.27	1.77	0.19		1.08	5.04	0.56
[20534]	CONVERGENT MARGIN	HONSHU ARC / NORTHEASTERN HONSHU ARC / HOKKAIDO / YOTEI		42.8	42.8	140.6	140.6	SAE			s_064-6-GL8 [20534]	NOT GIVEN [20534]									VOL					GL [20534]	60.5	1.09		16.68				7.32	6.45	2.41	0.26		0.96	4.61	0.5
[20534]	CONVERGENT MARGIN	HONSHU ARC / NORTHEASTERN HONSHU ARC / HOKKAIDO / YOTEI		42.8	42.8	140.6	140.6	SAE			s_064-6-GL9 [20534]	NOT GIVEN [20534]									VOL					GL [20534]	61.53	1.33		15.9				7.14	5.91	1.75	0.23		1.14	4.62	0.58
[20534]	CONVERGENT MARGIN	HONSHU ARC / NORTHEASTERN HONSHU ARC / HOKKAIDO / YOTEI		42.8	42.8	140.6	140.6	SAE			s_064-6-GL30 [20534]	NOT GIVEN [20534]									VOL					GL [20534]	62.7	1.34		15.38				6.74	5.57	1.42	0.26		1.24	4.86	0.71
[20534]	CONVERGENT MARGIN	HONSHU ARC / NORTHEASTERN HONSHU ARC / HOKKAIDO / YOTEI		42.8	42.8	140.6	140.6	SAE			s_064-6-GL34 [20534]	NOT GIVEN [20534]									VOL					GL [20534]	62.71	1.22		15.69				6.75	5.8	1.82	0.19		1.12	4.78	0.66
[20534]	CONVERGENT MARGIN	HONSHU ARC / NORTHEASTERN HONSHU ARC / HOKKAIDO / YOTEI		42.8	42.8	140.6	140.6	SAE			s_064-6-GL36 [20534]	NOT GIVEN [20534]									VOL					GL [20534]	63.32	1.54		14.35				7.89	5.28	1.54	0.28		1.45	4.63	0.79
[20534]	CONVERGENT MARGIN	HONSHU ARC / NORTHEASTERN HONSHU ARC / HOKKAIDO / YOTEI		42.8	42.8	140.6	140.6	SAE			s_064-6-GL40 [20534]	NOT GIVEN [20534]									VOL					GL [20534]	63.57	1.51		14.58				7.74	5.31	1.79	0.18		1.34	4.86	0.77
[20534]	CONVERGENT MARGIN	HONSHU ARC / NORTHEASTERN HONSHU ARC / HOKKAIDO / YOTEI		42.8	42.8	140.6	140.6	SAE			s_064-6-GL41 [20534]	NOT GIVEN [20534]									VOL					GL [20534]	62.34	1.33		16.27				6.46	5.94	1.3	0.22		1.24	5.04	0.65
[20534]	CONVERGENT MARGIN	HONSHU ARC / NORTHEASTERN HONSHU ARC / HOKKAIDO / YOTEI		42.8	42.8	140.6	140.6	SAE			s_064-6-GL42 [20534]	NOT GIVEN [20534]									VOL					GL [20534]	61.96	1.27		15.65				7.15	6.06	1.85	0.24		1.06	4.78	0.63
[20534]	CONVERGENT MARGIN	HONSHU ARC / NORTHEASTERN HONSHU ARC / HOKKAIDO / YOTEI		42.8	42.8	140.6	140.6	SAE			s_005-24-LIGR10 [20534]	NOT GIVEN [20534]									VOL					GL [20534]	67.45	0.39		15.17				3.37	2.76	0.71	0.14		1.51	4.92	0.15
[20534]	CONVERGENT MARGIN	HONSHU ARC / NORTHEASTERN HONSHU ARC / HOKKAIDO / YOTEI		42.8	42.8	140.6	140.6	SAE			s_005-24-YEL2 [20534]	NOT GIVEN [20534]									VOL					GL [20534]	69.31	0.45		15.42				3.77	2.77	0.78	0.23		1.64	4.75	0.17
[20534]	CONVERGENT MARGIN	HONSHU ARC / NORTHEASTERN HONSHU ARC / HOKKAIDO / YOTEI		42.8	42.8	140.6	140.6	SAE			s_005-24-YEL3 [20534]	NOT GIVEN [20534]									VOL					GL [20534]	71.78	0.44		15.29				3.68	2.78	0.73	0.2		1.7	4.6	0.17
[20534]	CONVERGENT MARGIN	HONSHU ARC / NORTHEASTERN HONSHU ARC / HOKKAIDO / YOTEI		42.8	42.8	140.6	140.6	SAE			s_005-24-YEL6 [20534]	NOT GIVEN [20534]									VOL					GL [20534]	70.61	0.46		15.56				3.37	3.07	0.65	0.13		1.56	5.22	0.13
[20534]	CONVERGENT MARGIN	HONSHU ARC / NORTHEASTERN HONSHU ARC / HOKKAIDO / YOTEI		42.8	42.8	140.6	140.6	SAE			s_005-24-YEL7 [20534]	NOT GIVEN [20534]									VOL					GL [20534]	69.9	0.51		14.54				3.71	2.7	0.7	0.25		1.63	5.07	0.13
[20534]	CONVERGENT MARGIN	HONSHU ARC / NORTHEASTERN HONSHU ARC / HOKKAIDO / YOTEI		42.8	42.8	140.6	140.6	SAE			s_005-24-YEL8 [20534]	NOT GIVEN [20534]									VOL					GL [20534]	71.67	0.4		15.57				3.4	2.93	0.69	0.15		1.65	5.19	0.16
[20534]	CONVERGENT MARGIN	HONSHU ARC / NORTHEASTERN HONSHU ARC / HOKKAIDO / YOTEI		42.8	42.8	140.6	140.6	SAE			s_005-24-YEL10 [20534]	NOT GIVEN [20534]									VOL					GL [20534]	69.98	0.46		15.03				3.46	3.02	0.65	0.19		1.56	5.13	0.12
[20534]	CONVERGENT MARGIN	HONSHU ARC / NORTHEASTERN HONSHU ARC / HOKKAIDO / YOTEI		42.8	42.8	140.6	140.6	SAE			s_002-17-1-GR6 [20534]	NOT GIVEN [20534]									VOL					GL [20534]	68.73	0.36		15.61				2.86	2.97	0.28	0.07		1.95	5.46	0.09
[20534]	CONVERGENT MARGIN	HONSHU ARC / NORTHEASTERN HONSHU ARC / HOKKAIDO / YOTEI		42.8	42.8	140.6	140.6	SAE			s_002-17-1-GR7 [20534]	NOT GIVEN [20534]									VOL					GL [20534]	67.95	0.36		16.15				3.01	3.5	0.52	0.13		1.71	5.68	0.1
[20534]	CONVERGENT MARGIN	HONSHU ARC / NORTHEASTERN HONSHU ARC / HOKKAIDO / YOTEI		42.8	42.8	140.6	140.6	SAE			s_002-17-1-GR11 [20534]	NOT GIVEN [20534]									VOL					GL [20534]	68.57	0.35		15.87				3.06	3.33	0.46	0.15		1.76	5.4	0.1
[20534]	CONVERGENT MARGIN	HONSHU ARC / NORTHEASTERN HONSHU ARC / HOKKAIDO / YOTEI		42.8	42.8	140.6	140.6	SAE			s_002-17-1-GR12 [20534]	NOT GIVEN [20534]									VOL					GL [20534]	68.92	0.38		14.95				3.11	2.76	0.31	0.11		1.97	5.24	0.09
[20534]	CONVERGENT MARGIN	HONSHU ARC / NORTHEASTERN HONSHU ARC / HOKKAIDO / YOTEI		42.8	42.8	140.6	140.6	SAE			s_002-17-1-GR16 [20534]	NOT GIVEN [20534]									VOL					GL [20534]	68.39	0.42		14.31				4.21	2.77	0.61	0.15		1.93	4.85	0.1
[20534]	CONVERGENT MARGIN	HONSHU ARC / NORTHEASTERN HONSHU ARC / HOKKAIDO / YOTEI		42.8	42.8	140.6	140.6	SAE			s_002-17-1-LIGR1 [20534]	NOT GIVEN [20534]									VOL					GL [20534]	66.46	0.35		16.2				3.92	3.61	0.75	0.14		1.54	5.48	0.07
[20534]	CONVERGENT MARGIN	HONSHU ARC / NORTHEASTERN HONSHU ARC / HOKKAIDO / YOTEI		42.8	42.8	140.6	140.6	SAE			s_002-17-1-LIGR2 [20534]	NOT GIVEN [20534]									VOL					GL [20534]	67.8	0.4		15.03				4.11	2.83	0.54	0.19		1.76	5.22	0.11
[20534]	CONVERGENT MARGIN	HONSHU ARC / NORTHEASTERN HONSHU ARC / HOKKAIDO / YOTEI		42.8	42.8	140.6	140.6	SAE			s_002-17-1-LIGR4 [20534]	NOT GIVEN [20534]									VOL					GL [20534]	67.53	0.36		15.46				3.57	3.1	0.44	0.15		1.73	5.38	0.1
[20534]	CONVERGENT MARGIN	HONSHU ARC / NORTHEASTERN HONSHU ARC / HOKKAIDO / YOTEI		42.8	42.8	140.6	140.6	SAE			s_002-17-1-LIGR5 [20534]	NOT GIVEN [20534]									VOL					GL [20534]	66.78	0.34		15.88				3.52	3.2	0.54	0.13		1.74	5.66	0.09
[20534]	CONVERGENT MARGIN	HONSHU ARC / NORTHEASTERN HONSHU ARC / HOKKAIDO / YOTEI		42.8	42.8	140.6	140.6	SAE			s_002-17-1-LIGR7 [20534]	NOT GIVEN [20534]									VOL					GL [20534]	65.59	0.38		15.92				3.32	3.22	0.31	0.13		1.61	5.31	0.1
[20534]	CONVERGENT MARGIN	HONSHU ARC / NORTHEASTERN HONSHU ARC / HOKKAIDO / YOTEI		42.8	42.8	140.6	140.6	SAE			s_002-17-1-LIGR8 [20534]	NOT GIVEN [20534]									VOL					GL [20534]	67.6	0.35		16.05				3.54	3.38	0.53	0.09		1.66	5.49	0.1
[20534]	CONVERGENT MARGIN	HONSHU ARC / NORTHEASTERN HONSHU ARC / HOKKAIDO / YOTEI		42.8	42.8	140.6	140.6	SAE			s_002-17-1-LIGR9 [20534]	NOT GIVEN [20534]									VOL					GL [20534]	69.32	0.45		14.76				4.41	2.78	0.62	0.14		1.93	4.77	0.12
[20534]	CONVERGENT MARGIN	HONSHU ARC / NORTHEASTERN HONSHU ARC / HOKKAIDO / YOTEI		42.8	42.8	140.6	140.6	SAE			s_002-17-1-LIGR12 [20534]	NOT GIVEN [20534]									VOL					GL [20534]	66.41	0.37		16.15				3.18	3.39	0.42	0.06		1.46	5.37	0.08
[20534]	CONVERGENT MARGIN	HONSHU ARC / NORTHEASTERN HONSHU ARC / HOKKAIDO / YOTEI		42.8	42.8	140.6	140.6	SAE			s_002-17-1-LIGR15 [20534]	NOT GIVEN [20534]									VOL					GL [20534]	66.98	0.38		16.55				3.22	3.46	0.34	0.09		1.6	5.71	0.08
[20534]	CONVERGENT MARGIN	HONSHU ARC / NORTHEASTERN HONSHU ARC / HOKKAIDO / YOTEI		42.8	42.8	140.6	140.6	SAE			s_002-17-1-WH3 [20534]	NOT GIVEN [20534]									VOL					GL [20534]	68.02	0.43		14.36				3.84	2.49	0.41	0.15		2.03	5.03	0.14
[20534]	CONVERGENT MARGIN	HONSHU ARC / NORTHEASTERN HONSHU ARC / HOKKAIDO / YOTEI		42.8	42.8	140.6	140.6	SAE			s_002-17-1-WH4 [20534]	NOT GIVEN [20534]									VOL					GL [20534]	68.57	0.46		14.55				4.4	2.73	0.7	0.16		1.88	4.84	0.12
[20534]	CONVERGENT MARGIN	HONSHU ARC / NORTHEASTERN HONSHU ARC / HOKKAIDO / YOTEI		42.8	42.8	140.6	140.6	SAE			s_002-17-1-WH6 [20534]	NOT GIVEN [20534]									VOL					GL [20534]	67.8	0.41		13.23				4.11	2.24	0.5	0.16		2.14	4.7	0.11
[20534]	CONVERGENT MARGIN	HONSHU ARC / NORTHEASTERN HONSHU ARC / HOKKAIDO / YOTEI		42.8	42.8	140.6	140.6	SAE			s_002-17-1-WH8 [20534]	NOT GIVEN [20534]									VOL					GL [20534]	65.9	0.41		15.12				4.11	3.3	0.76	0.15		1.58	5.03	0.09
[20534]	CONVERGENT MARGIN	HONSHU ARC / NORTHEASTERN HONSHU ARC / HOKKAIDO / YOTEI		42.8	42.8	140.6	140.6	SAE			s_002-17-1-WH10 [20534]	NOT GIVEN [20534]									VOL					GL [20534]	66.01	0.33		15.99				3.31	3.26	0.36	0.1		1.6	5.63	0.13
[20534]	CONVERGENT MARGIN	HONSHU ARC / NORTHEASTERN HONSHU ARC / HOKKAIDO / YOTEI		42.8	42.8	140.6	140.6	SAE			s_002-17-1-WH11 [20534]	NOT GIVEN [20534]									VOL					GL [20534]	67.19	0.38		15.73				3.26	3.25	0.39	0.13		1.72	5.44	0.1
[20534]	CONVERGENT MARGIN	HONSHU ARC / NORTHEASTERN HONSHU ARC / HOKKAIDO / YOTEI		42.8	42.8	140.6	140.6	SAE			s_002-17-1-WH12 [20534]	NOT GIVEN [20534]									VOL					GL [20534]	67.13	0.38		15.38				3.48	2.93	0.39	0.12		1.77	5.21	0.11
[20534]	CONVERGENT MARGIN	HONSHU ARC / NORTHEASTERN HONSHU ARC / HOKKAIDO / YOTEI		42.8	42.8	140.6	140.6	SAE			s_002-17-1-WH13 [20534]	NOT GIVEN [20534]									VOL					GL [20534]	66.12	0.41		15.92				3.17	3.22	0.36	0.15		1.65	5.5	0.11
[20534]	CONVERGENT MARGIN	HONSHU ARC / NORTHEASTERN HONSHU ARC / HOKKAIDO / YOTEI		42.8	42.8	140.6	140.6	SAE			s_001-22-WH4 [20534]	NOT GIVEN [20534]									VOL					GL [20534]	69.45	0.43		14.63				4.19	2.93	0.64	0.16		1.85	4.78	0.12
[20534]	CONVERGENT MARGIN	HONSHU ARC / NORTHEASTERN HONSHU ARC / HOKKAIDO / YOTEI		42.8	42.8	140.6	140.6	SAE			s_001-22-WH6 [20534]	NOT GIVEN [20534]									VOL					GL [20534]	68.59	0.38		14.6				4.16	2.91	0.66	0.18		1.87	4.62	0.12
[20534]	CONVERGENT MARGIN	HONSHU ARC / NORTHEASTERN HONSHU ARC / HOKKAIDO / YOTEI		42.8	42.8	140.6	140.6	SAE			s_001-22-WH8 [20534]	NOT GIVEN [20534]									VOL					GL [20534]	70.86	0.42		15.11				4.28	3.03	0.68	0.15		1.89	4.93	0.11
[20534]	CONVERGENT MARGIN	HONSHU ARC / NORTHEASTERN HONSHU ARC / HOKKAIDO / YOTEI		42.8	42.8	140.6	140.6	SAE			s_001-22-WH14 [20534]	NOT GIVEN [20534]									VOL					GL [20534]	69.1	0.42		14.95				4.24	3.02	0.74	0.19		1.82	5.11	0.11
[20534]	CONVERGENT MARGIN	HONSHU ARC / NORTHEASTERN HONSHU ARC / HOKKAIDO / YOTEI		42.8	42.8	140.6	140.6	SAE			s_001-22-WH17 [20534]	NOT GIVEN [20534]									VOL					GL [20534]	69.01	0.41		14.58				4.19	2.95	0.69	0.15		1.83	4.86	0.09
[20534]	CONVERGENT MARGIN	HONSHU ARC / NORTHEASTERN HONSHU ARC / HOKKAIDO / YOTEI		42.8	42.8	140.6	140.6	SAE			s_001-22-GR2 [20534]	NOT GIVEN [20534]									VOL					GL [20534]	70.27	0.37		14.66				3.13	2.7	0.25	0.16		1.93	5.42	0.1
[20534]	CONVERGENT MARGIN	HONSHU ARC / NORTHEASTERN HONSHU ARC / HOKKAIDO / YOTEI		42.8	42.8	140.6	140.6	SAE			s_001-22-GR3 [20534]	NOT GIVEN [20534]									VOL					GL [20534]	69.37	0.36		15.45				3.2	3.02	0.26	0.14		1.81	5.28	0.1
[20534]	CONVERGENT MARGIN	HONSHU ARC / NORTHEASTERN HONSHU ARC / HOKKAIDO / YOTEI		42.8	42.8	140.6	140.6	SAE			s_001-22-GR8 [20534]	NOT GIVEN [20534]									VOL					GL [20534]	70.98	0.4		13.73				3.49	2.31	0.28	0.13		2.15	4.94	0.1
[20534]	CONVERGENT MARGIN	HONSHU ARC / NORTHEASTERN HONSHU ARC / HOKKAIDO / YOTEI		42.8	42.8	140.6	140.6	SAE			s_001-22-GR9 [20534]	NOT GIVEN [20534]									VOL					GL [20534]	69.82	0.45		13.34				3.68	2.14	0.29	0.18		2.15	4.85	0.09
[20534]	CONVERGENT MARGIN	HONSHU ARC / NORTHEASTERN HONSHU ARC / HOKKAIDO / YOTEI		42.8	42.8	140.6	140.6	SAE			s_001-22-GR11 [20534]	NOT GIVEN [20534]									VOL					GL [20534]	68.38	0.39		14.97				3.22	2.96	0.28	0.13		1.76	5.82	0.11
[20534]	CONVERGENT MARGIN	HONSHU ARC / NORTHEASTERN HONSHU ARC / HOKKAIDO / YOTEI		42.8	42.8	140.6	140.6	SAE			s_001-22-GR16 [20534]	NOT GIVEN [20534]									VOL					GL [20534]	70.02	0.45		14.72				3.6	2.78	0.41	0.23		1.91	5.04	0.11
[20534]	CONVERGENT MARGIN	HONSHU ARC / NORTHEASTERN HONSHU ARC / HOKKAIDO / YOTEI		42.8	42.8	140.6	140.6	SAE			s_001-23-GR2 [20534]	NOT GIVEN [20534]									VOL					GL [20534]	67.78	0.5		15.6				3.25	3.45	0.43	0.16		1.8	5.61	0.17
[20534]	CONVERGENT MARGIN	HONSHU ARC / NORTHEASTERN HONSHU ARC / HOKKAIDO / YOTEI		42.8	42.8	140.6	140.6	SAE			s_001-23-GR16 [20534]	NOT GIVEN [20534]									VOL					GL [20534]	67.79	0.46		15.96				2.97	3.52	0.35	0.11		1.61	5.74	0.17
[20534]	CONVERGENT MARGIN	HONSHU ARC / NORTHEASTERN HONSHU ARC / HOKKAIDO / YOTEI		42.8	42.8	140.6	140.6	SAE			s_001-23-GR19 [20534]	NOT GIVEN [20534]									VOL					GL [20534]	66.77	0.39		16.55				3.68	3.91	0.74	0.18		1.39	5.75	0.12
[20534]	CONVERGENT MARGIN	HONSHU ARC / NORTHEASTERN HONSHU ARC / HOKKAIDO / YOTEI		42.8	42.8	140.6	140.6	SAE			s_001-24-YELL8 [20534]	NOT GIVEN [20534]									VOL					GL [20534]	68.6	0.43		16.16				3.81	3.39	0.71	0.18		1.53	5.38	0.15
[20534]	CONVERGENT MARGIN	HONSHU ARC / NORTHEASTERN HONSHU ARC / HOKKAIDO / YOTEI		42.8	42.8	140.6	140.6	SAE			s_001-18-WH1 [20534]	NOT GIVEN [20534]									VOL					GL [20534]	68.19	0.63		14.91				4.18	3.44	1	0.21		1.75	5.02	0.2
[20534]	CONVERGENT MARGIN	HONSHU ARC / NORTHEASTERN HONSHU ARC / HOKKAIDO / YOTEI		42.8	42.8	140.6	140.6	SAE			s_001-18-WH2 [20534]	NOT GIVEN [20534]									VOL					GL [20534]	66.1	0.64		14.56				4.05	3.46	1.03	0.16		1.81	4.75	0.17
[20534]	CONVERGENT MARGIN	HONSHU ARC / NORTHEASTERN HONSHU ARC / HOKKAIDO / YOTEI		42.8	42.8	140.6	140.6	SAE			s_001-18-WH5 [20534]	NOT GIVEN [20534]									VOL					GL [20534]	67.35	0.63		15.47				4.02	3.96	0.96	0.18		1.5	5.01	0.17
[20534]	CONVERGENT MARGIN	HONSHU ARC / NORTHEASTERN HONSHU ARC / HOKKAIDO / YOTEI		42.8	42.8	140.6	140.6	SAE			s_001-18-WH6 [20534]	NOT GIVEN [20534]									VOL					GL [20534]	68.26	0.63		14.89				4.3	3.44	1.07	0.21		1.71	5.01	0.19
[20534]	CONVERGENT MARGIN	HONSHU ARC / NORTHEASTERN HONSHU ARC / HOKKAIDO / YOTEI		42.8	42.8	140.6	140.6	SAE			s_001-18-WH7 [20534]	NOT GIVEN [20534]									VOL					GL [20534]	68.15	0.67		15.04				4.26	3.59	1.03	0.17		1.78	5.19	0.16
[20534]	CONVERGENT MARGIN	HONSHU ARC / NORTHEASTERN HONSHU ARC / HOKKAIDO / YOTEI		42.8	42.8	140.6	140.6	SAE			s_001-18-WH10 [20534]	NOT GIVEN [20534]									VOL					GL [20534]	68.06	0.55		15.23				4.16	3.57	0.98	0.17		1.73	5.05	0.16
[20534]	CONVERGENT MARGIN	HONSHU ARC / NORTHEASTERN HONSHU ARC / HOKKAIDO / YOTEI		42.8	42.8	140.6	140.6	SAE			s_001-18-WH11 [20534]	NOT GIVEN [20534]									VOL					GL [20534]	68.09	0.56		15.32				4.04	3.78	1.11	0.17		1.73	5.15	0.19
[20534]	CONVERGENT MARGIN	HONSHU ARC / NORTHEASTERN HONSHU ARC / HOKKAIDO / YOTEI		42.8	42.8	140.6	140.6	SAE			s_001-18-WH12 [20534]	NOT GIVEN [20534]									VOL					GL [20534]	67.15	0.57		14.78				4.12	3.4	1.06	0.17		1.81	4.86	0.21
[20534]	CONVERGENT MARGIN	HONSHU ARC / NORTHEASTERN HONSHU ARC / HOKKAIDO / YOTEI		42.8	42.8	140.6	140.6	SAE			s_001-18-WH13 [20534]	NOT GIVEN [20534]									VOL					GL [20534]	68.09	0.63		14.88				4.2	3.57	1.05	0.17		1.73	5.19	0.18
[20534]	CONVERGENT MARGIN	HONSHU ARC / NORTHEASTERN HONSHU ARC / HOKKAIDO / YOTEI		42.8	42.8	140.6	140.6	SAE			s_001-18-WH15 [20534]	NOT GIVEN [20534]									VOL					GL [20534]	68.28	0.66		14.89				4.25	3.46	1.06	0.15		1.71	5.34	0.18
[20534]	CONVERGENT MARGIN	HONSHU ARC / NORTHEASTERN HONSHU ARC / HOKKAIDO / YOTEI		42.8	42.8	140.6	140.6	SAE			s_001-18-GR2 [20534]	NOT GIVEN [20534]									VOL					GL [20534]	69.88	0.56		15.65				3.04	3.34	0.46	0.14		1.8	5.55	0.13
[20534]	CONVERGENT MARGIN	HONSHU ARC / NORTHEASTERN HONSHU ARC / HOKKAIDO / YOTEI		42.8	42.8	140.6	140.6	SAE			s_001-18-GR3 [20534]	NOT GIVEN [20534]									VOL					GL [20534]	69.05	0.55		15.67				2.93	3.29	0.33	0.12		1.85	5.34	0.18
[20534]	CONVERGENT MARGIN	HONSHU ARC / NORTHEASTERN HONSHU ARC / HOKKAIDO / YOTEI		42.8	42.8	140.6	140.6	SAE			s_001-18-GR8 [20534]	NOT GIVEN [20534]									VOL					GL [20534]	68.74	0.58		15.69				2.67	3.28	0.42	0.11		1.82	5.42	0.19
[20534]	CONVERGENT MARGIN	HONSHU ARC / NORTHEASTERN HONSHU ARC / HOKKAIDO / YOTEI		42.8	42.8	140.6	140.6	SAE			s_001-18-GR12 [20534]	NOT GIVEN [20534]									VOL					GL [20534]	69.31	0.53		15.99				2.94	3.35	0.38	0.11		1.82	5.26	0.15
[20534]	CONVERGENT MARGIN	HONSHU ARC / NORTHEASTERN HONSHU ARC / HOKKAIDO / YOTEI		42.8	42.8	140.6	140.6	SAE			s_001-18-SCO6 [20534]	NOT GIVEN [20534]									VOL					GL [20534]	64.3	1.15		16.16				6.07	5.28	1.14	0.17		1.12	5.34	0.42
[20534]	CONVERGENT MARGIN	HONSHU ARC / NORTHEASTERN HONSHU ARC / HOKKAIDO / YOTEI		42.8	42.8	140.6	140.6	SAE			s_001-18-SCO14 [20534]	NOT GIVEN [20534]									VOL					GL [20534]	63.21	1.19		16.08				6.46	5.79	1.21	0.17		0.99	5.47	0.54
[20534]	CONVERGENT MARGIN	HONSHU ARC / NORTHEASTERN HONSHU ARC / HOKKAIDO / YOTEI		42.8	42.8	140.6	140.6	SAE			s_001-19-WH2 [20534]	NOT GIVEN [20534]									VOL					GL [20534]	63.04	1.08		15.47				6.28	5.24	1.13	0.14		1.47	4.81	0.6
[20534]	CONVERGENT MARGIN	HONSHU ARC / NORTHEASTERN HONSHU ARC / HOKKAIDO / YOTEI		42.8	42.8	140.6	140.6	SAE			s_001-19-GR6 [20534]	NOT GIVEN [20534]									VOL					GL [20534]	63.7	0.87		16.18				4.86	5.24	1.2	0.14		1.47	5.18	0.51
[20534]	CONVERGENT MARGIN	HONSHU ARC / NORTHEASTERN HONSHU ARC / HOKKAIDO / YOTEI		42.8	42.8	140.6	140.6	SAE			s_001-20-GR5 [20534]	NOT GIVEN [20534]									VOL					GL [20534]	61.12	1.12		16.04				7.02	5.65	1.93	0.21		1.1	5.05	0.49
[20534]	CONVERGENT MARGIN	HONSHU ARC / NORTHEASTERN HONSHU ARC / HOKKAIDO / YOTEI		42.8	42.8	140.6	140.6	SAE			s_001-20-GR6 [20534]	NOT GIVEN [20534]									VOL					GL [20534]	61.64	1.21		16.76				7.13	6.11	1.36	0.23		1.08	5.07	0.48
[20534]	CONVERGENT MARGIN	HONSHU ARC / NORTHEASTERN HONSHU ARC / HOKKAIDO / YOTEI		42.8	42.8	140.6	140.6	SAE			s_002-14-GR2 [20534]	NOT GIVEN [20534]									VOL					GL [20534]	69.18	0.56		16.65				2.74	3.74	0.31	0.14		1.75	5.27	0.19
[20534]	CONVERGENT MARGIN	HONSHU ARC / NORTHEASTERN HONSHU ARC / HOKKAIDO / YOTEI		42.8	42.8	140.6	140.6	SAE			s_002-14-GR6 [20534]	NOT GIVEN [20534]									VOL					GL [20534]	69.64	0.68		13.79				3.37	2.28	0.41	0.17		2.14	4.44	0.24
[20534]	CONVERGENT MARGIN	HONSHU ARC / NORTHEASTERN HONSHU ARC / HOKKAIDO / YOTEI		42.8	42.8	140.6	140.6	SAE			s_002-14-GR7 [20534]	NOT GIVEN [20534]									VOL					GL [20534]	69.52	0.6		15.55				2.94	3.04	0.34	0.1		1.83	5.34	0.18
[20534]	CONVERGENT MARGIN	HONSHU ARC / NORTHEASTERN HONSHU ARC / HOKKAIDO / YOTEI		42.8	42.8	140.6	140.6	SAE			s_002-14-GR8 [20534]	NOT GIVEN [20534]									VOL					GL [20534]	67.99	0.49		16.44				2.68	3.76	0.31	0.11		1.64	5.26	0.19
[20534]	CONVERGENT MARGIN	HONSHU ARC / NORTHEASTERN HONSHU ARC / HOKKAIDO / YOTEI		42.8	42.8	140.6	140.6	SAE			s_002-14-GR15 [20534]	NOT GIVEN [20534]									VOL					GL [20534]	69.63	0.74		14.87				3.91	2.97	0.51	0.12		2	4.9	0.22
[20534]	CONVERGENT MARGIN	HONSHU ARC / NORTHEASTERN HONSHU ARC / HOKKAIDO / YOTEI		42.8	42.8	140.6	140.6	SAE			s_002-14-BL9 [20534]	NOT GIVEN [20534]									VOL					GL [20534]	68.11	0.56		14.46				3.6	2.83	0.61	0.15		1.85	4.66	0.18
[20534]	CONVERGENT MARGIN	HONSHU ARC / NORTHEASTERN HONSHU ARC / HOKKAIDO / YOTEI		42.8	42.8	140.6	140.6	SAE			s_002-14-BL13 [20534]	NOT GIVEN [20534]									VOL					GL [20534]	72.12	0.56		14.18				3.05	2.57	0.4	0.15		2.22	4.66	0.2
[20534]	CONVERGENT MARGIN	HONSHU ARC / NORTHEASTERN HONSHU ARC / HOKKAIDO / YOTEI		42.8	42.8	140.6	140.6	SAE			s_002-14-BL14 [20534]	NOT GIVEN [20534]									VOL					GL [20534]	68.37	0.53		16.44				2.7	3.57	0.46	0.12		1.71	5.11	0.16
[20534]	CONVERGENT MARGIN	HONSHU ARC / NORTHEASTERN HONSHU ARC / HOKKAIDO / YOTEI		42.8	42.8	140.6	140.6	SAE			s_005-20-YEL5 [20534]	NOT GIVEN [20534]									VOL					GL [20534]	71.24	0.57		15.57				4.36	3.28	0.98	0.21		1.8	4.96	0.28
[20534]	CONVERGENT MARGIN	HONSHU ARC / NORTHEASTERN HONSHU ARC / HOKKAIDO / YOTEI		42.8	42.8	140.6	140.6	SAE			s_005-20-YEL6 [20534]	NOT GIVEN [20534]									VOL					GL [20534]	66.21	0.52		14.87				4.26	3.3	0.92	0.2		1.71	4.58	0.23
[20534]	CONVERGENT MARGIN	HONSHU ARC / NORTHEASTERN HONSHU ARC / HOKKAIDO / YOTEI		42.8	42.8	140.6	140.6	SAE			s_005-20-YEL14 [20534]	NOT GIVEN [20534]									VOL					GL [20534]	68.72	0.6		15.78				4.1	3.76	0.85	0.15		1.41	5.31	0.24
[20534]	CONVERGENT MARGIN	HONSHU ARC / NORTHEASTERN HONSHU ARC / HOKKAIDO / YOTEI		42.8	42.8	140.6	140.6	SAE			s_005-20-GR4 [20534]	NOT GIVEN [20534]									VOL					GL [20534]	66.57	0.65		14.75				4.33	3.68	0.99	0.19		1.46	4.74	0.22
[20534]	CONVERGENT MARGIN	HONSHU ARC / NORTHEASTERN HONSHU ARC / HOKKAIDO / YOTEI		42.8	42.8	140.6	140.6	SAE			s_005-20-GR5 [20534]	NOT GIVEN [20534]									VOL					GL [20534]	67.8	0.48		16.13				3.56	3.71	0.66	0.14		1.18	5.5	0.15
[20534]	CONVERGENT MARGIN	HONSHU ARC / NORTHEASTERN HONSHU ARC / HOKKAIDO / YOTEI		42.8	42.8	140.6	140.6	SAE			s_005-20-GR8 [20534]	NOT GIVEN [20534]									VOL					GL [20534]	68.81	0.6		14.83				4.44	3.47	0.81	0.21		1.8	4.43	0.23
[20534]	CONVERGENT MARGIN	HONSHU ARC / NORTHEASTERN HONSHU ARC / HOKKAIDO / YOTEI		42.8	42.8	140.6	140.6	SAE			s_005-20-GR12 [20534]	NOT GIVEN [20534]									VOL					GL [20534]	69.32	0.59		14.48				4.42	3.52	0.89	0.13		1.66	4.72	0.21
[20534]	CONVERGENT MARGIN	HONSHU ARC / NORTHEASTERN HONSHU ARC / HOKKAIDO / YOTEI		42.8	42.8	140.6	140.6	SAE			s_005-20-GR16 [20534]	NOT GIVEN [20534]									VOL					GL [20534]	68.04	0.5		16.04				3.66	3.84	0.69	0.16		1.48	5.25	0.22
[20534]	CONVERGENT MARGIN	HONSHU ARC / NORTHEASTERN HONSHU ARC / HOKKAIDO / YOTEI		42.8	42.8	140.6	140.6	SAE			s_041-12-WH2 [20534]	NOT GIVEN [20534]									VOL					GL [20534]	66.27	0.5		15.19				3.76	3.69	0.83	0.16		1.47	5.33	0.14
[20534]	CONVERGENT MARGIN	HONSHU ARC / NORTHEASTERN HONSHU ARC / HOKKAIDO / YOTEI		42.8	42.8	140.6	140.6	SAE			s_041-12-WH3 [20534]	NOT GIVEN [20534]									VOL					GL [20534]	67.66	0.55		14.92				4.38	3.15	0.82	0.12		1.75	5.05	0.17
[20534]	CONVERGENT MARGIN	HONSHU ARC / NORTHEASTERN HONSHU ARC / HOKKAIDO / YOTEI		42.8	42.8	140.6	140.6	SAE			s_041-12-WH7 [20534]	NOT GIVEN [20534]									VOL					GL [20534]	66.69	0.55		14.68				4.17	3.33	0.82	0.19		1.75	4.63	0.18
[20534]	CONVERGENT MARGIN	HONSHU ARC / NORTHEASTERN HONSHU ARC / HOKKAIDO / YOTEI		42.8	42.8	140.6	140.6	SAE			s_041-12-WH10 [20534]	NOT GIVEN [20534]									VOL					GL [20534]	67.05	0.56		14.74				4.28	3.15	0.87	0.12		1.76	4.52	0.16
[20534]	CONVERGENT MARGIN	HONSHU ARC / NORTHEASTERN HONSHU ARC / HOKKAIDO / YOTEI		42.8	42.8	140.6	140.6	SAE			s_041-12-WH12 [20534]	NOT GIVEN [20534]									VOL					GL [20534]	66.55	0.53		15.57				3.62	3.62	0.71	0.16		1.51	5.24	0.17
[20534]	CONVERGENT MARGIN	HONSHU ARC / NORTHEASTERN HONSHU ARC / HOKKAIDO / YOTEI		42.8	42.8	140.6	140.6	SAE			s_041-12-WH13 [20534]	NOT GIVEN [20534]									VOL					GL [20534]	65.94	0.57		14.57				4.32	3.13	0.85	0.17		1.73	4.81	0.16
[20534]	CONVERGENT MARGIN	HONSHU ARC / NORTHEASTERN HONSHU ARC / HOKKAIDO / YOTEI		42.8	42.8	140.6	140.6	SAE			s_041-12-WH14 [20534]	NOT GIVEN [20534]									VOL					GL [20534]	67.56	0.55		14.91				4.2	3.26	0.9	0.19		1.77	4.99	0.15
[20534]	CONVERGENT MARGIN	HONSHU ARC / NORTHEASTERN HONSHU ARC / HOKKAIDO / YOTEI		42.8	42.8	140.6	140.6	SAE			s_041-12-GR1 [20534]	NOT GIVEN [20534]									VOL					GL [20534]	66.66	0.65		14.39				3.87	2.92	0.57	0.16		1.89	4.86	0.2
[20534]	CONVERGENT MARGIN	HONSHU ARC / NORTHEASTERN HONSHU ARC / HOKKAIDO / YOTEI		42.8	42.8	140.6	140.6	SAE			s_041-12-GR2 [20534]	NOT GIVEN [20534]									VOL					GL [20534]	66.49	0.43		16.12				3.01	3.56	0.33	0.1		1.61	5.57	0.13
[20534]	CONVERGENT MARGIN	HONSHU ARC / NORTHEASTERN HONSHU ARC / HOKKAIDO / YOTEI		42.8	42.8	140.6	140.6	SAE			s_041-12-GR4 [20534]	NOT GIVEN [20534]									VOL					GL [20534]	66.77	0.44		16.09				3.1	3.57	0.45	0.09		1.6	5.51	0.14
[20534]	CONVERGENT MARGIN	HONSHU ARC / NORTHEASTERN HONSHU ARC / HOKKAIDO / YOTEI		42.8	42.8	140.6	140.6	SAE			s_041-12-GR7 [20534]	NOT GIVEN [20534]									VOL					GL [20534]	67	0.6		14.54				4.32	3.11	0.77	0.15		1.85	5.05	0.17
[20534]	CONVERGENT MARGIN	HONSHU ARC / NORTHEASTERN HONSHU ARC / HOKKAIDO / YOTEI		42.8	42.8	140.6	140.6	SAE			s_041-12-GR10 [20534]	NOT GIVEN [20534]									VOL					GL [20534]	66.48	0.49		15.41				3.34	3.33	0.45	0.13		1.68	5.37	0.14
[20534]	CONVERGENT MARGIN	HONSHU ARC / NORTHEASTERN HONSHU ARC / HOKKAIDO / YOTEI		42.8	42.8	140.6	140.6	SAE			s_041-12-GR13 [20534]	NOT GIVEN [20534]									VOL					GL [20534]	66.99	0.39		15.6				2.63	3.26	0.26	0.09		1.75	5.4	0.15
[20534]	CONVERGENT MARGIN	HONSHU ARC / NORTHEASTERN HONSHU ARC / HOKKAIDO / YOTEI		42.8	42.8	140.6	140.6	SAE			s_041-12-GR14 [20534]	NOT GIVEN [20534]									VOL					GL [20534]	68.89	0.5		13.87				3.38	2.67	0.38	0.13		2.07	4.98	0.2
[20534]	CONVERGENT MARGIN	HONSHU ARC / NORTHEASTERN HONSHU ARC / HOKKAIDO / YOTEI		42.8	42.8	140.6	140.6	SAE			s_041-12-LIGR2 [20534]	NOT GIVEN [20534]									VOL					GL [20534]	67.8	0.54		15.22				3.78	3.13	0.54	0.15		1.82	5.01	0.16
[20534]	CONVERGENT MARGIN	HONSHU ARC / NORTHEASTERN HONSHU ARC / HOKKAIDO / YOTEI		42.8	42.8	140.6	140.6	SAE			s_041-12-LIGR3 [20534]	NOT GIVEN [20534]									VOL					GL [20534]	65.98	0.49		15.53				3.29	3.42	0.43	0.08		1.67	5.45	0.13
[20534]	CONVERGENT MARGIN	HONSHU ARC / NORTHEASTERN HONSHU ARC / HOKKAIDO / YOTEI		42.8	42.8	140.6	140.6	SAE			s_041-12-LIGR4 [20534]	NOT GIVEN [20534]									VOL					GL [20534]	68.19	0.7		13				4.26	2.34	0.57	0.18		2.03	4.51	0.18
[20534]	CONVERGENT MARGIN	HONSHU ARC / NORTHEASTERN HONSHU ARC / HOKKAIDO / YOTEI		42.8	42.8	140.6	140.6	SAE			s_041-12-LIGR6 [20534]	NOT GIVEN [20534]									VOL					GL [20534]	66.33	0.48		16.13				3.22	3.67	0.38	0.16		1.53	5.38	0.14
[20534]	CONVERGENT MARGIN	HONSHU ARC / NORTHEASTERN HONSHU ARC / HOKKAIDO / YOTEI		42.8	42.8	140.6	140.6	SAE			s_041-12-LIGR9 [20534]	NOT GIVEN [20534]									VOL					GL [20534]	67.48	0.61		15.23				3.72	3.22	0.51	0.14		1.75	5.1	0.16
[20534]	CONVERGENT MARGIN	HONSHU ARC / NORTHEASTERN HONSHU ARC / HOKKAIDO / YOTEI		42.8	42.8	140.6	140.6	SAE			s_041-12-LIGR14 [20534]	NOT GIVEN [20534]									VOL					GL [20534]	67.65	0.66		13.61				4.25	2.56	0.61	0.21		2.05	4.9	0.19
[20534]	CONVERGENT MARGIN	HONSHU ARC / NORTHEASTERN HONSHU ARC / HOKKAIDO / YOTEI		42.8	42.8	140.6	140.6	SAE			s_041-12-LIGR15 [20534]	NOT GIVEN [20534]									VOL					GL [20534]	67.5	0.59		14.39				3.9	2.92	0.56	0.14		1.95	4.84	0.17
[20534]	CONVERGENT MARGIN	HONSHU ARC / NORTHEASTERN HONSHU ARC / HOKKAIDO / YOTEI		42.8	42.8	140.6	140.6	SAE			s_041-12-LIGR18 [20534]	NOT GIVEN [20534]									VOL					GL [20534]	67.31	0.55		14.73				3.86	2.97	0.45	0.16		1.76	4.96	0.13
[20534]	CONVERGENT MARGIN	HONSHU ARC / NORTHEASTERN HONSHU ARC / HOKKAIDO / YOTEI		42.8	42.8	140.6	140.6	SAE			s_002-13.1-GR6 [20534]	NOT GIVEN [20534]									VOL					GL [20534]	66.14	0.79		15.41				4.83	3.74	1.12	0.16		1.62	4.92	0.24
[20534]	CONVERGENT MARGIN	HONSHU ARC / NORTHEASTERN HONSHU ARC / HOKKAIDO / YOTEI		42.8	42.8	140.6	140.6	SAE			s_002-13.1-GR7 [20534]	NOT GIVEN [20534]									VOL					GL [20534]	65.98	0.8		14.78				4.72	3.53	1.12	0.24		1.71	4.83	0.23
[20534]	CONVERGENT MARGIN	HONSHU ARC / NORTHEASTERN HONSHU ARC / HOKKAIDO / YOTEI		42.8	42.8	140.6	140.6	SAE			s_002-13.1-GR8 [20534]	NOT GIVEN [20534]									VOL					GL [20534]	66.64	0.78		14.68				4.81	3.57	1.06	0.19		1.64	4.86	0.23
[20534]	CONVERGENT MARGIN	HONSHU ARC / NORTHEASTERN HONSHU ARC / HOKKAIDO / YOTEI		42.8	42.8	140.6	140.6	SAE			s_002-13.1-GR9 [20534]	NOT GIVEN [20534]									VOL					GL [20534]	66.07	0.72		14.96				4.81	3.59	1.02	0.22		1.71	4.69	0.23
[20534]	CONVERGENT MARGIN	HONSHU ARC / NORTHEASTERN HONSHU ARC / HOKKAIDO / YOTEI		42.8	42.8	140.6	140.6	SAE			s_002-13.1-GR10 [20534]	NOT GIVEN [20534]									VOL					GL [20534]	65.74	0.79		15.31				4.54	3.77	1.02	0.2		1.56	4.8	0.22
[20534]	CONVERGENT MARGIN	HONSHU ARC / NORTHEASTERN HONSHU ARC / HOKKAIDO / YOTEI		42.8	42.8	140.6	140.6	SAE			s_002-13.1-GR11 [20534]	NOT GIVEN [20534]									VOL					GL [20534]	65.83	0.76		14.6				4.71	3.35	1.11	0.2		1.71	4.55	0.21
[20534]	CONVERGENT MARGIN	HONSHU ARC / NORTHEASTERN HONSHU ARC / HOKKAIDO / YOTEI		42.8	42.8	140.6	140.6	SAE			s_002-13.1-LIGR1 [20534]	NOT GIVEN [20534]									VOL					GL [20534]	68.85	0.76		14.04				3.85	2.74	0.55	0.16		1.97	4.9	0.29
[20534]	CONVERGENT MARGIN	HONSHU ARC / NORTHEASTERN HONSHU ARC / HOKKAIDO / YOTEI		42.8	42.8	140.6	140.6	SAE			s_002-13.1-LIGR5 [20534]	NOT GIVEN [20534]									VOL					GL [20534]	68.1	0.66		14.96				3.48	3.2	0.4	0.1		1.84	5.24	0.29
[20534]	CONVERGENT MARGIN	HONSHU ARC / NORTHEASTERN HONSHU ARC / HOKKAIDO / YOTEI		42.8	42.8	140.6	140.6	SAE			s_002-13.1-LIGR6 [20534]	NOT GIVEN [20534]									VOL					GL [20534]	64.6	0.65		15.42				3.8	3.8	0.76	0.17		1.59	5.03	0.21
[20534]	CONVERGENT MARGIN	HONSHU ARC / NORTHEASTERN HONSHU ARC / HOKKAIDO / YOTEI		42.8	42.8	140.6	140.6	SAE			s_002-13.1-LIGR11 [20534]	NOT GIVEN [20534]									VOL					GL [20534]	67.53	0.75		14.55				3.52	2.91	0.52	0.16		2.01	4.9	0.24
[20534]	CONVERGENT MARGIN	HONSHU ARC / NORTHEASTERN HONSHU ARC / HOKKAIDO / YOTEI		42.8	42.8	140.6	140.6	SAE			s_002-13.1-LIGR13 [20534]	NOT GIVEN [20534]									VOL					GL [20534]	67.56	0.59		15.61				3.18	3.23	0.42	0.14		1.81	5.43	0.2
[20534]	CONVERGENT MARGIN	HONSHU ARC / NORTHEASTERN HONSHU ARC / HOKKAIDO / YOTEI		42.8	42.8	140.6	140.6	SAE			s_002-13.1-WH1 [20534]	NOT GIVEN [20534]									VOL					GL [20534]	64.24	0.71		14.88				4.68	3.77	1.18	0.17		1.63	5	0.23
[20534]	CONVERGENT MARGIN	HONSHU ARC / NORTHEASTERN HONSHU ARC / HOKKAIDO / YOTEI		42.8	42.8	140.6	140.6	SAE			s_002-13.1-WH3 [20534]	NOT GIVEN [20534]									VOL					GL [20534]	65.27	0.73		15.7				3.99	3.83	0.72	0.17		1.61	5.08	0.23
[20534]	CONVERGENT MARGIN	HONSHU ARC / NORTHEASTERN HONSHU ARC / HOKKAIDO / YOTEI		42.8	42.8	140.6	140.6	SAE			s_002-13.1-WH5 [20534]	NOT GIVEN [20534]									VOL					GL [20534]	64.9	0.75		14.77				4.18	3.47	0.8	0.16		1.66	4.89	0.26
[20534]	CONVERGENT MARGIN	HONSHU ARC / NORTHEASTERN HONSHU ARC / HOKKAIDO / YOTEI		42.8	42.8	140.6	140.6	SAE			s_002-13.1-WH6 [20534]	NOT GIVEN [20534]									VOL					GL [20534]	65.57	0.74		15.08				4.29	3.65	1.01	0.15		1.61	4.97	0.22
[20534]	CONVERGENT MARGIN	HONSHU ARC / NORTHEASTERN HONSHU ARC / HOKKAIDO / YOTEI		42.8	42.8	140.6	140.6	SAE			s_002-13.1-WH7 [20534]	NOT GIVEN [20534]									VOL					GL [20534]	66.23	0.86		14.24				5	3.3	0.97	0.21		1.83	4.6	0.27
[20534]	CONVERGENT MARGIN	HONSHU ARC / NORTHEASTERN HONSHU ARC / HOKKAIDO / YOTEI		42.8	42.8	140.6	140.6	SAE			s_002-13.1-WH9 [20534]	NOT GIVEN [20534]									VOL					GL [20534]	66.53	0.79		14.33				4.56	3.21	0.8	0.18		1.83	4.62	0.23
[20534]	CONVERGENT MARGIN	HONSHU ARC / NORTHEASTERN HONSHU ARC / HOKKAIDO / YOTEI		42.8	42.8	140.6	140.6	SAE			s_002-13.1-WH12 [20534]	NOT GIVEN [20534]									VOL					GL [20534]	65.57	0.76		13.74				4.65	2.98	0.8	0.18		1.95	4.6	0.26
[20534]	CONVERGENT MARGIN	HONSHU ARC / NORTHEASTERN HONSHU ARC / HOKKAIDO / YOTEI		42.8	42.8	140.6	140.6	SAE			s_002-13.1-WH13 [20534]	NOT GIVEN [20534]									VOL					GL [20534]	65.34	0.81		14.8				4.48	3.43	0.76	0.15		1.81	5.13	0.29
[20534]	CONVERGENT MARGIN	HONSHU ARC / NORTHEASTERN HONSHU ARC / HOKKAIDO / YOTEI		42.8	42.8	140.6	140.6	SAE			s_002-13.1-WH15 [20534]	NOT GIVEN [20534]									VOL					GL [20534]	63.33	0.74		14.81				4.95	3.81	1.36	0.21		1.58	4.69	0.23
[20534]	CONVERGENT MARGIN	HONSHU ARC / NORTHEASTERN HONSHU ARC / HOKKAIDO / YOTEI		42.8	42.8	140.6	140.6	SAE			s_013-33-GRSCO9 [20534]	NOT GIVEN [20534]									VOL					GL [20534]	70.14	0.45		15.06				3.44	2.94	0.51	0.15		1.81	5.26	0.21
[20534]	CONVERGENT MARGIN	HONSHU ARC / NORTHEASTERN HONSHU ARC / HOKKAIDO / YOTEI		42.8	42.8	140.6	140.6	SAE			s_013-33-GRSCO15 [20534]	NOT GIVEN [20534]									VOL					GL [20534]	69.69	0.52		15.56				3.65	3.25	0.42	0.14		1.81	5.07	0.15
[20534]	CONVERGENT MARGIN	HONSHU ARC / NORTHEASTERN HONSHU ARC / HOKKAIDO / YOTEI		42.8	42.8	140.6	140.6	SAE			s_013-34-8 [20534]	NOT GIVEN [20534]									VOL					GL [20534]	68.14	0.64		15.41				4.53	3.44	1.06	0.21		1.69	4.88	0.22
[20534]	CONVERGENT MARGIN	HONSHU ARC / NORTHEASTERN HONSHU ARC / HOKKAIDO / YOTEI		42.8	42.8	140.6	140.6	SAE			s_013-34-10 [20534]	NOT GIVEN [20534]									VOL					GL [20534]	67.4	0.48		14.79				4.59	3.5	0.93	0.2		1.81	4.56	0.24
[20534]	CONVERGENT MARGIN	HONSHU ARC / NORTHEASTERN HONSHU ARC / HOKKAIDO / YOTEI		42.8	42.8	140.6	140.6	SAE			s_013-34-12 [20534]	NOT GIVEN [20534]									VOL					GL [20534]	66.29	0.46		14.42				3.87	2.97	0.86	0.16		1.67	4.9	0.19
[20534]	CONVERGENT MARGIN	HONSHU ARC / NORTHEASTERN HONSHU ARC / HOKKAIDO / YOTEI		42.8	42.8	140.6	140.6	SAE			s_013-34-13 [20534]	NOT GIVEN [20534]									VOL					GL [20534]	67.46	0.51		14.48				4.26	3.14	0.77	0.22		1.79	4.63	0.17
[20534]	CONVERGENT MARGIN	HONSHU ARC / NORTHEASTERN HONSHU ARC / HOKKAIDO / YOTEI		42.8	42.8	140.6	140.6	SAE			s_013-34-16 [20534]	NOT GIVEN [20534]									VOL					GL [20534]	66.95	0.62		14.91				4.7	3.66	1.02	0.21		1.73	4.85	0.2
[20534]	CONVERGENT MARGIN	HONSHU ARC / NORTHEASTERN HONSHU ARC / HOKKAIDO / YOTEI		42.8	42.8	140.6	140.6	SAE			s_013-34-18 [20534]	NOT GIVEN [20534]									VOL					GL [20534]	65.79	0.6		14.38				4.38	3.44	0.95	0.21		1.56	4.29	0.26
[20534]	CONVERGENT MARGIN	HONSHU ARC / NORTHEASTERN HONSHU ARC / HOKKAIDO / YOTEI		42.8	42.8	140.6	140.6	SAE			s_013-34-20 [20534]	NOT GIVEN [20534]									VOL					GL [20534]	69.21	0.62		15.38				4.76	3.84	1.1	0.24		1.6	4.76	0.24
[20534]	CONVERGENT MARGIN	HONSHU ARC / NORTHEASTERN HONSHU ARC / HOKKAIDO / YOTEI		42.8	42.8	140.6	140.6	SAE			s_013-34-21 [20534]	NOT GIVEN [20534]									VOL					GL [20534]	70.51	0.45		14.39				4.3	3.09	0.61	0.18		1.78	4.82	0.14
[20534]	CONVERGENT MARGIN	HONSHU ARC / NORTHEASTERN HONSHU ARC / HOKKAIDO / YOTEI		42.8	42.8	140.6	140.6	SAE			s_013-32-WH1 [20534]	NOT GIVEN [20534]									VOL					GL [20534]	67.59	0.52		14.61				4.04	3.23	0.88	0.16		1.69	4.62	0.15
[20534]	CONVERGENT MARGIN	HONSHU ARC / NORTHEASTERN HONSHU ARC / HOKKAIDO / YOTEI		42.8	42.8	140.6	140.6	SAE			s_013-32-WH4 [20534]	NOT GIVEN [20534]									VOL					GL [20534]	68.15	0.55		14.38				4.23	3.27	0.82	0.15		1.72	4.82	0.16
[20534]	CONVERGENT MARGIN	HONSHU ARC / NORTHEASTERN HONSHU ARC / HOKKAIDO / YOTEI		42.8	42.8	140.6	140.6	SAE			s_013-32-WH5 [20534]	NOT GIVEN [20534]									VOL					GL [20534]	69.87	0.56		14.82				4.18	3.21	0.85	0.19		1.7	5.06	0.17
[20534]	CONVERGENT MARGIN	HONSHU ARC / NORTHEASTERN HONSHU ARC / HOKKAIDO / YOTEI		42.8	42.8	140.6	140.6	SAE			s_013-32-WH6 [20534]	NOT GIVEN [20534]									VOL					GL [20534]	69.07	0.6		14.72				4.2	3.18	0.85	0.12		1.75	4.95	0.16
[20534]	CONVERGENT MARGIN	HONSHU ARC / NORTHEASTERN HONSHU ARC / HOKKAIDO / YOTEI		42.8	42.8	140.6	140.6	SAE			s_013-32-WH7 [20534]	NOT GIVEN [20534]									VOL					GL [20534]	69.5	0.53		14.67				4.26	3.26	0.84	0.16		1.75	5.04	0.16
[20534]	CONVERGENT MARGIN	HONSHU ARC / NORTHEASTERN HONSHU ARC / HOKKAIDO / YOTEI		42.8	42.8	140.6	140.6	SAE			s_013-32-WH9 [20534]	NOT GIVEN [20534]									VOL					GL [20534]	69.47	0.6		14.93				4.15	3.09	0.83	0.12		1.73	5.01	0.13
[20534]	CONVERGENT MARGIN	HONSHU ARC / NORTHEASTERN HONSHU ARC / HOKKAIDO / YOTEI		42.8	42.8	140.6	140.6	SAE			s_013-32-WH10 [20534]	NOT GIVEN [20534]									VOL					GL [20534]	69.33	0.54		14.76				4.18	3.29	0.86	0.19		1.69	4.66	0.17
[20534]	CONVERGENT MARGIN	HONSHU ARC / NORTHEASTERN HONSHU ARC / HOKKAIDO / YOTEI		42.8	42.8	140.6	140.6	SAE			s_013-32-WH13 [20534]	NOT GIVEN [20534]									VOL					GL [20534]	66.39	0.58		14.28				3.96	3.12	0.94	0.16		1.75	4.81	0.14
[20534]	CONVERGENT MARGIN	HONSHU ARC / NORTHEASTERN HONSHU ARC / HOKKAIDO / YOTEI		42.8	42.8	140.6	140.6	SAE			s_013-32-LIGE1 [20534]	NOT GIVEN [20534]									VOL					GL [20534]	68.29	0.44		15.79				3.84	3.53	0.71	0.15		1.6	5.41	0.1
[20534]	CONVERGENT MARGIN	HONSHU ARC / NORTHEASTERN HONSHU ARC / HOKKAIDO / YOTEI		42.8	42.8	140.6	140.6	SAE			s_013-32-LIGR4 [20534]	NOT GIVEN [20534]									VOL					GL [20534]	68.17	0.55		14.75				3.55	3	0.47	0.14		1.71	4.91	0.16
[20534]	CONVERGENT MARGIN	HONSHU ARC / NORTHEASTERN HONSHU ARC / HOKKAIDO / YOTEI		42.8	42.8	140.6	140.6	SAE			s_013-32-LIGR5 [20534]	NOT GIVEN [20534]									VOL					GL [20534]	62.71	0.5		14.82				3.87	3.36	0.74	0.17		1.65	4.81	0.13
[20534]	CONVERGENT MARGIN	HONSHU ARC / NORTHEASTERN HONSHU ARC / HOKKAIDO / YOTEI		42.8	42.8	140.6	140.6	SAE			s_013-32-LIGR9 [20534]	NOT GIVEN [20534]									VOL					GL [20534]	65.63	0.43		16.76				2.73	3.91	0.29	0.1		1.31	5.43	0.17
[20534]	CONVERGENT MARGIN	HONSHU ARC / NORTHEASTERN HONSHU ARC / HOKKAIDO / YOTEI		42.8	42.8	140.6	140.6	SAE			s_013-32-LIGR10 [20534]	NOT GIVEN [20534]									VOL					GL [20534]	70.53	0.62		13.69				3.59	2.68	0.38	0.13		1.89	4.94	0.16
[20534]	CONVERGENT MARGIN	HONSHU ARC / NORTHEASTERN HONSHU ARC / HOKKAIDO / YOTEI		42.8	42.8	140.6	140.6	SAE			s_013-32-LIGR11 [20534]	NOT GIVEN [20534]									VOL					GL [20534]	71.72	0.63		13.47				3.85	2.41	0.39	0.1		2.11	4.82	0.15
[20534]	CONVERGENT MARGIN	HONSHU ARC / NORTHEASTERN HONSHU ARC / HOKKAIDO / YOTEI		42.8	42.8	140.6	140.6	SAE			s_013-32-LIGR12 [20534]	NOT GIVEN [20534]									VOL					GL [20534]	68.51	0.55		15.23				3.28	3.21	0.41	0.14		1.69	5.17	0.16
[20534]	CONVERGENT MARGIN	HONSHU ARC / NORTHEASTERN HONSHU ARC / HOKKAIDO / YOTEI		42.8	42.8	140.6	140.6	SAE			s_013-32-LIGR13 [20534]	NOT GIVEN [20534]									VOL					GL [20534]	69.74	0.57		14.74				3.65	3.07	0.48	0.19		1.75	4.76	0.14
[20534]	CONVERGENT MARGIN	HONSHU ARC / NORTHEASTERN HONSHU ARC / HOKKAIDO / YOTEI		42.8	42.8	140.6	140.6	SAE			s_013-32-LIGR15 [20534]	NOT GIVEN [20534]									VOL					GL [20534]	67.56	0.42		16.45				3.25	3.89	0.59	0.12		1.35	5.47	0.13
[20534]	CONVERGENT MARGIN	HONSHU ARC / NORTHEASTERN HONSHU ARC / HOKKAIDO / YOTEI		42.8	42.8	140.6	140.6	SAE			s_013-32-GR1 [20534]	NOT GIVEN [20534]									VOL					GL [20534]	68.25	0.48		16.34				2.95	3.64	0.25	0.09		1.5	5.52	0.14
[20534]	CONVERGENT MARGIN	HONSHU ARC / NORTHEASTERN HONSHU ARC / HOKKAIDO / YOTEI		42.8	42.8	140.6	140.6	SAE			s_013-32-GR4 [20534]	NOT GIVEN [20534]									VOL					GL [20534]	69.04	0.55		15.48				3.11	3.22	0.28	0.15		1.86	5.08	0.15
[20534]	CONVERGENT MARGIN	HONSHU ARC / NORTHEASTERN HONSHU ARC / HOKKAIDO / YOTEI		42.8	42.8	140.6	140.6	SAE			s_013-32-GR6 [20534]	NOT GIVEN [20534]									VOL					GL [20534]	69.24	0.58		14.26				3.61	2.82	0.33	0.12		2.08	4.93	0.17
[20534]	CONVERGENT MARGIN	HONSHU ARC / NORTHEASTERN HONSHU ARC / HOKKAIDO / YOTEI		42.8	42.8	140.6	140.6	SAE			s_013-32-GR7 [20534]	NOT GIVEN [20534]									VOL					GL [20534]	67.93	0.53		16				3.05	3.34	0.29	0.08		1.8	5.66	0.14
[20534]	CONVERGENT MARGIN	HONSHU ARC / NORTHEASTERN HONSHU ARC / HOKKAIDO / YOTEI		42.8	42.8	140.6	140.6	SAE			s_013-32-GR8 [20534]	NOT GIVEN [20534]									VOL					GL [20534]	70.76	0.67		13.14				3.77	2.19	0.34	0.12		2.24	4.57	0.23
[20534]	CONVERGENT MARGIN	HONSHU ARC / NORTHEASTERN HONSHU ARC / HOKKAIDO / YOTEI		42.8	42.8	140.6	140.6	SAE			s_013-32-GR10 [20534]	NOT GIVEN [20534]									VOL					GL [20534]	68.75	0.55		15.3				3.21	3.17	0.3	0.13		1.89	4.99	0.15
[20534]	CONVERGENT MARGIN	HONSHU ARC / NORTHEASTERN HONSHU ARC / HOKKAIDO / YOTEI		42.8	42.8	140.6	140.6	SAE			s_013-32-GR11 [20534]	NOT GIVEN [20534]									VOL					GL [20534]	69.97	0.65		13.69				4.03	2.49	0.47	0.09		2.01	4.86	0.17
[20534]	CONVERGENT MARGIN	HONSHU ARC / NORTHEASTERN HONSHU ARC / HOKKAIDO / YOTEI		42.8	42.8	140.6	140.6	SAE			s_013-32-GR13 [20534]	NOT GIVEN [20534]									VOL					GL [20534]	70.99	0.68		12.62				4.06	1.87	0.43	0.19		2.4	4.43	0.24
[20534]	CONVERGENT MARGIN	HONSHU ARC / NORTHEASTERN HONSHU ARC / HOKKAIDO / YOTEI		42.8	42.8	140.6	140.6	SAE			s_013-32-GR14 [20534]	NOT GIVEN [20534]									VOL					GL [20534]	68.58	0.68		13.05				4.8	2.4	0.83	0.19		2.16	4.68	0.18
[20534]	CONVERGENT MARGIN	HONSHU ARC / NORTHEASTERN HONSHU ARC / HOKKAIDO / YOTEI		42.8	42.8	140.6	140.6	SAE			s_013-32-GR15 [20534]	NOT GIVEN [20534]									VOL					GL [20534]	70.57	0.7		13.44				4.16	2.46	0.48	0.16		2.2	4.77	0.17
[20534]	CONVERGENT MARGIN	HONSHU ARC / NORTHEASTERN HONSHU ARC / HOKKAIDO / YOTEI		42.8	42.8	140.6	140.6	SAE			s_013-32-GR16 [20534]	NOT GIVEN [20534]									VOL					GL [20534]	69.05	0.52		15.69				3.41	3.42	0.37	0.11		1.66	5.27	0.14
[20534]	CONVERGENT MARGIN	HONSHU ARC / NORTHEASTERN HONSHU ARC / HOKKAIDO / YOTEI		42.8	42.8	140.6	140.6	SAE			s_002-13-1 WH2 [20534]	NOT GIVEN [20534]									VOL					GL [20534]	62.96	0.93		16.8				5.63	5.64	1.58	0.2		1.09	4.89	0.47
[20534]	CONVERGENT MARGIN	HONSHU ARC / NORTHEASTERN HONSHU ARC / HOKKAIDO / YOTEI		42.8	42.8	140.6	140.6	SAE			s_002-13-1 WH10 [20534]	NOT GIVEN [20534]									VOL					GL [20534]	63.06	0.99		16.17				6.64	5.65	2.75	0.23		1.15	4.44	0.5
[20534]	CONVERGENT MARGIN	HONSHU ARC / NORTHEASTERN HONSHU ARC / HOKKAIDO / YOTEI		42.8	42.8	140.6	140.6	SAE			s_002-13-1 WH12 [20534]	NOT GIVEN [20534]									VOL					GL [20534]	63.76	0.95		16.69				6.13	5.39	1.58	0.34		1.21	5	0.52
[20534]	CONVERGENT MARGIN	HONSHU ARC / NORTHEASTERN HONSHU ARC / HOKKAIDO / YOTEI		42.8	42.8	140.6	140.6	SAE			s_002-13-1 WH15 [20534]	NOT GIVEN [20534]									VOL					GL [20534]	63.62	1.07		15.35				6.67	5.12	1.88	0.22		1.3	4.64	0.56
[20534]	CONVERGENT MARGIN	HONSHU ARC / NORTHEASTERN HONSHU ARC / HOKKAIDO / YOTEI		42.8	42.8	140.6	140.6	SAE			s_002-13-1-GR4 [20534]	NOT GIVEN [20534]									VOL					GL [20534]	63.52	0.96		16.84				5.74	5.43	1.49	0.16		1.36	4.92	0.55
[20534]	CONVERGENT MARGIN	HONSHU ARC / NORTHEASTERN HONSHU ARC / HOKKAIDO / YOTEI		42.8	42.8	140.6	140.6	SAE			s_002-13-1-GR8(DLF) [20534]	NOT GIVEN [20534]									VOL					GL [20534]	64.08	1.09		14.91				6.55	4.87	1.5	0.25		1.61	4.5	0.64
[20534]	CONVERGENT MARGIN	HONSHU ARC / NORTHEASTERN HONSHU ARC / HOKKAIDO / YOTEI		42.8	42.8	140.6	140.6	SAE			s_002-13-1-GR10 [20534]	NOT GIVEN [20534]									VOL					GL [20534]	62.01	0.8		16.92				6.49	5.69	2.7	0.21		0.99	4.84	0.41
[20534]	CONVERGENT MARGIN	HONSHU ARC / NORTHEASTERN HONSHU ARC / HOKKAIDO / YOTEI		42.8	42.8	140.6	140.6	SAE			s_002-13-1-GR12 [20534]	NOT GIVEN [20534]									VOL					GL [20534]	64.4	1.02		16.18				5.78	5.19	1.08	0.15		1.53	4.94	0.62
[20534]	CONVERGENT MARGIN	HONSHU ARC / NORTHEASTERN HONSHU ARC / HOKKAIDO / YOTEI		42.8	42.8	140.6	140.6	SAE			s_002-13-1-GR14 [20534]	NOT GIVEN [20534]									VOL					GL [20534]	64.2	1.16		15.66				6.18	5.1	1.14	0.19		1.53	4.59	0.62
[20534]	CONVERGENT MARGIN	HONSHU ARC / NORTHEASTERN HONSHU ARC / HOKKAIDO / YOTEI		42.8	42.8	140.6	140.6	SAE			s_002-13-1-GR16 [20534]	NOT GIVEN [20534]									VOL					GL [20534]	62.73	1.06		15.75				6.21	5.12	1.58	0.18		1.35	4.63	0.57
[20534]	CONVERGENT MARGIN	HONSHU ARC / NORTHEASTERN HONSHU ARC / HOKKAIDO / YOTEI		42.8	42.8	140.6	140.6	SAE			s_002-13-1-GR17 [20534]	NOT GIVEN [20534]									VOL					GL [20534]	62.44	0.89		16.64				6.64	5.71	2.75	0.22		1.09	4.73	0.43
[20534]	CONVERGENT MARGIN	HONSHU ARC / NORTHEASTERN HONSHU ARC / HOKKAIDO / YOTEI		42.8	42.8	140.6	140.6	SAE			s_001-16-SCO3 [20534]	NOT GIVEN [20534]									VOL					GL [20534]	61.62	0.92		16.87				6.77	5.84	2.61	0.25		0.98	4.9	0.47
[20534]	CONVERGENT MARGIN	HONSHU ARC / NORTHEASTERN HONSHU ARC / HOKKAIDO / YOTEI		42.8	42.8	140.6	140.6	SAE			s_001-16-SCO5 [20534]	NOT GIVEN [20534]									VOL					GL [20534]	63.8	1.03		16.16				6.69	5.31	1.98	0.2		1.34	4.95	0.52
[20534]	CONVERGENT MARGIN	HONSHU ARC / NORTHEASTERN HONSHU ARC / HOKKAIDO / YOTEI		42.8	42.8	140.6	140.6	SAE			s_001-16-SCO9 [20534]	NOT GIVEN [20534]									VOL					GL [20534]	62.61	0.98		16.19				6.45	5.43	2.02	0.18		1.24	5.23	0.48
[20534]	CONVERGENT MARGIN	HONSHU ARC / NORTHEASTERN HONSHU ARC / HOKKAIDO / YOTEI		42.8	42.8	140.6	140.6	SAE			s_001-16-SCO12 [20534]	NOT GIVEN [20534]									VOL					GL [20534]	62.66	0.97		16.43				6.17	5.63	2.29	0.21		1.16	5.1	0.43
[20534]	CONVERGENT MARGIN	HONSHU ARC / NORTHEASTERN HONSHU ARC / HOKKAIDO / YOTEI		42.8	42.8	140.6	140.6	SAE			s_001-16-SCO13 [20534]	NOT GIVEN [20534]									VOL					GL [20534]	62.61	1.06		15.06				6.56	4.55	1.98	0.25		1.44	4.8	0.53
[20534]	CONVERGENT MARGIN	HONSHU ARC / NORTHEASTERN HONSHU ARC / HOKKAIDO / YOTEI		42.8	42.8	140.6	140.6	SAE			s_001-16-SCO14 [20534]	NOT GIVEN [20534]									VOL					GL [20534]	63.06	1.04		15.69				6.51	5.22	2.08	0.25		1.26	4.9	0.55
[20534]	CONVERGENT MARGIN	HONSHU ARC / NORTHEASTERN HONSHU ARC / HOKKAIDO / YOTEI		42.8	42.8	140.6	140.6	SAE			s_002-13-1-SCO2 [20534]	NOT GIVEN [20534]									VOL					GL [20534]	64.43	1.27		15.57				5.96	5.14	0.73	0.15		1.59	4.76	0.61
[20534]	CONVERGENT MARGIN	HONSHU ARC / NORTHEASTERN HONSHU ARC / HOKKAIDO / YOTEI		42.8	42.8	140.6	140.6	SAE			s_002-13-1-SCO4 [20534]	NOT GIVEN [20534]									VOL					GL [20534]	63.62	0.96		16.53				5.85	5.41	1.48	0.18		1.22	4.84	0.51
[20534]	CONVERGENT MARGIN	HONSHU ARC / NORTHEASTERN HONSHU ARC / HOKKAIDO / YOTEI		42.8	42.8	140.6	140.6	SAE			s_002-13-1-SCO5 [20534]	NOT GIVEN [20534]									VOL					GL [20534]	64.23	1.17		15.92				6.04	5.11	1.09	0.16		1.51	4.92	0.59
[20534]	CONVERGENT MARGIN	HONSHU ARC / NORTHEASTERN HONSHU ARC / HOKKAIDO / YOTEI		42.8	42.8	140.6	140.6	SAE			s_002-13-1-SCO15 [20534]	NOT GIVEN [20534]									VOL					GL [20534]	63.19	1.1		16.34				5.62	5.48	1.15	0.18		1.42	4.7	0.57
[20534]	CONVERGENT MARGIN	HONSHU ARC / NORTHEASTERN HONSHU ARC / HOKKAIDO / YOTEI		42.8	42.8	140.6	140.6	SAE			s_004-23-SCO2 [20534]	NOT GIVEN [20534]									VOL					GL [20534]	63.83	1.09		15.46				6.79	5.19	1.55	0.27		1.46	4.44	0.57
[20534]	CONVERGENT MARGIN	HONSHU ARC / NORTHEASTERN HONSHU ARC / HOKKAIDO / YOTEI		42.8	42.8	140.6	140.6	SAE			s_004-23-SCO5 [20534]	NOT GIVEN [20534]									VOL					GL [20534]	64.78	1.07		16.14				6.99	5.09	1.9	0.22		1.41	5.01	0.6
[20534]	CONVERGENT MARGIN	HONSHU ARC / NORTHEASTERN HONSHU ARC / HOKKAIDO / YOTEI		42.8	42.8	140.6	140.6	SAE			s_004-23-SCO6 [20534]	NOT GIVEN [20534]									VOL					GL [20534]	63.36	1.14		15.03				6.68	5.19	1.79	0.19		1.42	4.71	0.59
[20534]	CONVERGENT MARGIN	HONSHU ARC / NORTHEASTERN HONSHU ARC / HOKKAIDO / YOTEI		42.8	42.8	140.6	140.6	SAE			s_004-23-SCO7 [20534]	NOT GIVEN [20534]									VOL					GL [20534]	64.6	1.05		16.33				6.01	5.3	1.06	0.18		1.38	5.05	0.59
[20534]	CONVERGENT MARGIN	HONSHU ARC / NORTHEASTERN HONSHU ARC / HOKKAIDO / YOTEI		42.8	42.8	140.6	140.6	SAE			s_013-30-WH1 [20534]	NOT GIVEN [20534]									VOL					GL [20534]	68.46	0.59		15.19				3.78	3.17	0.9	0.2		1.84	4.99	0.12
[20534]	CONVERGENT MARGIN	HONSHU ARC / NORTHEASTERN HONSHU ARC / HOKKAIDO / YOTEI		42.8	42.8	140.6	140.6	SAE			s_013-30-WH2 [20534]	NOT GIVEN [20534]									VOL					GL [20534]	70.09	0.57		15.17				3.99	2.93	0.96	0.21		1.94	4.81	0.16
[20534]	CONVERGENT MARGIN	HONSHU ARC / NORTHEASTERN HONSHU ARC / HOKKAIDO / YOTEI		42.8	42.8	140.6	140.6	SAE			s_013-30-WH3 [20534]	NOT GIVEN [20534]									VOL					GL [20534]	67.92	0.5		15.99				3.41	3.57	0.82	0.14		1.59	5.11	0.13
[20534]	CONVERGENT MARGIN	HONSHU ARC / NORTHEASTERN HONSHU ARC / HOKKAIDO / YOTEI		42.8	42.8	140.6	140.6	SAE			s_013-30-WH4 [20534]	NOT GIVEN [20534]									VOL					GL [20534]	67.5	0.49		16.11				3.3	3.54	0.8	0.08		1.66	5.21	0.13
[20534]	CONVERGENT MARGIN	HONSHU ARC / NORTHEASTERN HONSHU ARC / HOKKAIDO / YOTEI		42.8	42.8	140.6	140.6	SAE			s_013-30-WH5 [20534]	NOT GIVEN [20534]									VOL					GL [20534]	68.68	0.58		14.36				4.01	2.91	0.96	0.12		1.88	4.59	0.16
[20534]	CONVERGENT MARGIN	HONSHU ARC / NORTHEASTERN HONSHU ARC / HOKKAIDO / YOTEI		42.8	42.8	140.6	140.6	SAE			s_013-30-WH6 [20534]	NOT GIVEN [20534]									VOL					GL [20534]	67.14	0.59		14.41				3.84	3	0.9	0.17		1.85	4.69	0.15
[20534]	CONVERGENT MARGIN	HONSHU ARC / NORTHEASTERN HONSHU ARC / HOKKAIDO / YOTEI		42.8	42.8	140.6	140.6	SAE			s_013-30-WH7 [20534]	NOT GIVEN [20534]									VOL					GL [20534]	68.57	0.57		14.79				3.89	3.27	0.88	0.13		1.8	4.73	0.12
[20534]	CONVERGENT MARGIN	HONSHU ARC / NORTHEASTERN HONSHU ARC / HOKKAIDO / YOTEI		42.8	42.8	140.6	140.6	SAE			s_013-30-GR2 [20534]	NOT GIVEN [20534]									VOL					GL [20534]	67.98	0.59		14.78				3.1	2.88	0.42	0.14		1.87	4.7	0.12
[20534]	CONVERGENT MARGIN	HONSHU ARC / NORTHEASTERN HONSHU ARC / HOKKAIDO / YOTEI		42.8	42.8	140.6	140.6	SAE			s_013-30-GR3 [20534]	NOT GIVEN [20534]									VOL					GL [20534]	70.03	0.6		13.94				3.24	2.55	0.4	0.19		2.13	4.69	0.16
[20534]	CONVERGENT MARGIN	HONSHU ARC / NORTHEASTERN HONSHU ARC / HOKKAIDO / YOTEI		42.8	42.8	140.6	140.6	SAE			s_013-30-GR4 [20534]	NOT GIVEN [20534]									VOL					GL [20534]	69.18	0.51		16.22				2.57	3.35	0.31	0.11		1.81	5.17	0.14
[20534]	CONVERGENT MARGIN	HONSHU ARC / NORTHEASTERN HONSHU ARC / HOKKAIDO / YOTEI		42.8	42.8	140.6	140.6	SAE			s_013-30-GR5 [20534]	NOT GIVEN [20534]									VOL					GL [20534]	68.68	0.56		15.62				2.73	3.16	0.36	0.09		1.8	5.24	0.13
[20534]	CONVERGENT MARGIN	HONSHU ARC / NORTHEASTERN HONSHU ARC / HOKKAIDO / YOTEI		42.8	42.8	140.6	140.6	SAE			s_013-29-WH4 [20534]	NOT GIVEN [20534]									VOL					GL [20534]	69.63	0.84		12.66				4.98	2.35	0.92	0.19		2.22	4.27	0.24
[20534]	CONVERGENT MARGIN	HONSHU ARC / NORTHEASTERN HONSHU ARC / HOKKAIDO / YOTEI		42.8	42.8	140.6	140.6	SAE			s_013-29-WH5 [20534]	NOT GIVEN [20534]									VOL					GL [20534]	69.84	0.72		14.93				3.67	2.73	0.46	0.16		2.03	5.01	0.22
[20534]	CONVERGENT MARGIN	HONSHU ARC / NORTHEASTERN HONSHU ARC / HOKKAIDO / YOTEI		42.8	42.8	140.6	140.6	SAE			s_013-29-WH6 [20534]	NOT GIVEN [20534]									VOL					GL [20534]	66.57	0.53		16.65				2.97	3.72	0.43	0.1		1.53	5.54	0.17
[20534]	CONVERGENT MARGIN	HONSHU ARC / NORTHEASTERN HONSHU ARC / HOKKAIDO / YOTEI		42.8	42.8	140.6	140.6	SAE			s_013-29-WH8 [20534]	NOT GIVEN [20534]									VOL					GL [20534]	67.22	0.63		14.99				3.78	3.11	0.71	0.15		1.76	4.93	0.16
[20534]	CONVERGENT MARGIN	HONSHU ARC / NORTHEASTERN HONSHU ARC / HOKKAIDO / YOTEI		42.8	42.8	140.6	140.6	SAE			s_013-29-WH10 [20534]	NOT GIVEN [20534]									VOL					GL [20534]	70.06	0.72		13.48				4	2.39	0.48	0.2		2.2	4.76	0.2
[20534]	CONVERGENT MARGIN	HONSHU ARC / NORTHEASTERN HONSHU ARC / HOKKAIDO / YOTEI		42.8	42.8	140.6	140.6	SAE			s_013-29-GR1 [20534]	NOT GIVEN [20534]									VOL					GL [20534]	69.09	0.44		16.42				2.59	3.56	0.35	0.06		1.67	5.56	0.15
[20534]	CONVERGENT MARGIN	HONSHU ARC / NORTHEASTERN HONSHU ARC / HOKKAIDO / YOTEI		42.8	42.8	140.6	140.6	SAE			s_013-29-GR4 [20534]	NOT GIVEN [20534]									VOL					GL [20534]	72.55	0.51		13.79				2.93	2.34	0.28	0.08		2.21	4.94	0.17
[20534]	CONVERGENT MARGIN	HONSHU ARC / NORTHEASTERN HONSHU ARC / HOKKAIDO / YOTEI		42.8	42.8	140.6	140.6	SAE			s_013-29-GR5 [20534]	NOT GIVEN [20534]									VOL					GL [20534]	70.34	0.49		15.38				2.54	2.91	0.29	0.12		1.99	5.32	0.15
[20534]	CONVERGENT MARGIN	HONSHU ARC / NORTHEASTERN HONSHU ARC / HOKKAIDO / YOTEI		42.8	42.8	140.6	140.6	SAE			s_013-29-GR6 [20534]	NOT GIVEN [20534]									VOL					GL [20534]	72.11	0.47		14.47				2.82	2.54	0.3	0.14		2.19	5.09	0.1
[20534]	CONVERGENT MARGIN	HONSHU ARC / NORTHEASTERN HONSHU ARC / HOKKAIDO / YOTEI		42.8	42.8	140.6	140.6	SAE			s_013-29-GR7 [20534]	NOT GIVEN [20534]									VOL					GL [20534]	69.29	0.38		16.59				2.28	3.27	0.22	0.1		1.81	5.62	0.12
[20534]	CONVERGENT MARGIN	HONSHU ARC / NORTHEASTERN HONSHU ARC / HOKKAIDO / YOTEI		42.8	42.8	140.6	140.6	SAE			s_013-29-GR8 [20534]	NOT GIVEN [20534]									VOL					GL [20534]	70.52	0.39		15.58				2.59	2.99	0.26	0.1		1.91	5.31	0.15
[20534]	CONVERGENT MARGIN	HONSHU ARC / NORTHEASTERN HONSHU ARC / HOKKAIDO / YOTEI		42.8	42.8	140.6	140.6	SAE			s_013-29-GR9 [20534]	NOT GIVEN [20534]									VOL					GL [20534]	67.71	0.39		16.56				2.18	3.41	0.23	0.1		1.63	5.47	0.12
[20534]	CONVERGENT MARGIN	HONSHU ARC / NORTHEASTERN HONSHU ARC / HOKKAIDO / YOTEI		42.8	42.8	140.6	140.6	SAE			s_013-29-GR10 [20534]	NOT GIVEN [20534]									VOL					GL [20534]	70	0.49		15				2.7	2.93	0.28	0.09		2.07	5.07	0.17
[20534]	CONVERGENT MARGIN	HONSHU ARC / NORTHEASTERN HONSHU ARC / HOKKAIDO / YOTEI		42.8	42.8	140.6	140.6	SAE			s_013-29-GR12 [20534]	NOT GIVEN [20534]									VOL					GL [20534]	69.26	0.44		16.33				2.58	3.34	0.3	0.06		1.77	5.75	0.15
[20534]	CONVERGENT MARGIN	HONSHU ARC / NORTHEASTERN HONSHU ARC / HOKKAIDO / YOTEI		42.8	42.8	140.6	140.6	SAE			s_013-27-WH1 [20534]	NOT GIVEN [20534]									VOL					GL [20534]	67.62			14.74				3.9	3.15	0.82	0.16		1.78	4.34	0.14
[20534]	CONVERGENT MARGIN	HONSHU ARC / NORTHEASTERN HONSHU ARC / HOKKAIDO / YOTEI		42.8	42.8	140.6	140.6	SAE			s_013-27-WH5 [20534]	NOT GIVEN [20534]									VOL					GL [20534]	69.49			14.84				3.71	3.11	0.83	0.15		1.87	4.65	0.13
[20534]	CONVERGENT MARGIN	HONSHU ARC / NORTHEASTERN HONSHU ARC / HOKKAIDO / YOTEI		42.8	42.8	140.6	140.6	SAE			s_013-27-WH6 [20534]	NOT GIVEN [20534]									VOL					GL [20534]	69.22			15.06				3.79	3.16	0.84	0.21		1.8	5.05	0.16
[20534]	CONVERGENT MARGIN	HONSHU ARC / NORTHEASTERN HONSHU ARC / HOKKAIDO / YOTEI		42.8	42.8	140.6	140.6	SAE			s_013-27-WH7 [20534]	NOT GIVEN [20534]									VOL					GL [20534]	69.43			14.86				3.73	3.07	0.83	0.21		1.84	4.56	0.13
[20534]	CONVERGENT MARGIN	HONSHU ARC / NORTHEASTERN HONSHU ARC / HOKKAIDO / YOTEI		42.8	42.8	140.6	140.6	SAE			s_013-27-WH9 [20534]	NOT GIVEN [20534]									VOL					GL [20534]	69.06			14.83				3.63	3.1	0.78	0.15		1.82	4.64	0.13
[20534]	CONVERGENT MARGIN	HONSHU ARC / NORTHEASTERN HONSHU ARC / HOKKAIDO / YOTEI		42.8	42.8	140.6	140.6	SAE			s_013-27-WH11 [20534]	NOT GIVEN [20534]									VOL					GL [20534]	67.27			14.59				3.64	2.89	0.77	0.17		1.79	4.47	0.16
[20534]	CONVERGENT MARGIN	HONSHU ARC / NORTHEASTERN HONSHU ARC / HOKKAIDO / YOTEI		42.8	42.8	140.6	140.6	SAE			s_013-27-WH12 [20534]	NOT GIVEN [20534]									VOL					GL [20534]	68.88			14.82				3.72	3.16	0.82	0.23		1.89	4.57	0.16
[20534]	CONVERGENT MARGIN	HONSHU ARC / NORTHEASTERN HONSHU ARC / HOKKAIDO / YOTEI		42.8	42.8	140.6	140.6	SAE			s_013-27-WH13 [20534]	NOT GIVEN [20534]									VOL					GL [20534]	69.14			15.12				3.78	3.1	0.81	0.18		1.86	4.86	0.16
[20534]	CONVERGENT MARGIN	HONSHU ARC / NORTHEASTERN HONSHU ARC / HOKKAIDO / YOTEI		42.8	42.8	140.6	140.6	SAE			s_013-27-GR1 [20534]	NOT GIVEN [20534]									VOL					GL [20534]	67.6			15				3.56	2.86	0.35	0.12		1.86	5.21	0.14
[20534]	CONVERGENT MARGIN	HONSHU ARC / NORTHEASTERN HONSHU ARC / HOKKAIDO / YOTEI		42.8	42.8	140.6	140.6	SAE			s_013-27-GR2 [20534]	NOT GIVEN [20534]									VOL					GL [20534]	69.86			14.54				3.48	2.68	0.45	0.1		2.03	5.15	0.16
[20534]	CONVERGENT MARGIN	HONSHU ARC / NORTHEASTERN HONSHU ARC / HOKKAIDO / YOTEI		42.8	42.8	140.6	140.6	SAE			s_013-27-GR3 [20534]	NOT GIVEN [20534]									VOL					GL [20534]	69.83			15.3				2.72	3.05	0.37	0.14		1.87	5.3	0.13
[20534]	CONVERGENT MARGIN	HONSHU ARC / NORTHEASTERN HONSHU ARC / HOKKAIDO / YOTEI		42.8	42.8	140.6	140.6	SAE			s_013-27-GR4 [20534]	NOT GIVEN [20534]									VOL					GL [20534]	67.49			16.37				2.49	3.49	0.35	0.12		1.55	5.62	0.11
[20534]	CONVERGENT MARGIN	HONSHU ARC / NORTHEASTERN HONSHU ARC / HOKKAIDO / YOTEI		42.8	42.8	140.6	140.6	SAE			s_013-27-GR7 [20534]	NOT GIVEN [20534]									VOL					GL [20534]	67.65			16.51				3.16	3.75	0.66	0.12		1.52	5.53	0.11
[20534]	CONVERGENT MARGIN	HONSHU ARC / NORTHEASTERN HONSHU ARC / HOKKAIDO / YOTEI		42.8	42.8	140.6	140.6	SAE			s_013-27-GR8 [20534]	NOT GIVEN [20534]									VOL					GL [20534]	68.67			15.31				2.31	3.03	0.24	0.08		1.85	5.35	0.13
[20534]	CONVERGENT MARGIN	HONSHU ARC / NORTHEASTERN HONSHU ARC / HOKKAIDO / YOTEI		42.8	42.8	140.6	140.6	SAE			s_013-27-GR9 [20534]	NOT GIVEN [20534]									VOL					GL [20534]	69.83			15.33				3.2	3.1	0.69	0.17		1.79	5.36	0.14
[20534]	CONVERGENT MARGIN	HONSHU ARC / NORTHEASTERN HONSHU ARC / HOKKAIDO / YOTEI		42.8	42.8	140.6	140.6	SAE			s_013-27-GR10 [20534]	NOT GIVEN [20534]									VOL					GL [20534]	69.79			15.44				2.58	2.96	0.36	0.07		1.79	5.26	0.14
[20534]	CONVERGENT MARGIN	HONSHU ARC / NORTHEASTERN HONSHU ARC / HOKKAIDO / YOTEI		42.8	42.8	140.6	140.6	SAE			s_013-27-GR13 [20534]	NOT GIVEN [20534]									VOL					GL [20534]	68.98			15.35				3.55	3.22	0.8	0.2		1.6	5.3	0.12
[20534]	CONVERGENT MARGIN	HONSHU ARC / NORTHEASTERN HONSHU ARC / HOKKAIDO / YOTEI		42.8	42.8	140.6	140.6	SAE			s_013-27-GR14 [20534]	NOT GIVEN [20534]									VOL					GL [20534]	68.18			15.75				3.01	3.31	0.53	0.14		1.72	5.34	0.12
[20534]	CONVERGENT MARGIN	HONSHU ARC / NORTHEASTERN HONSHU ARC / HOKKAIDO / YOTEI		42.8	42.8	140.6	140.6	SAE			s_013-27-GR15 [20534]	NOT GIVEN [20534]									VOL					GL [20534]	69.95			13.89				3.36	2.44	0.49	0.13		2.03	5.02	0.14
[20534]	CONVERGENT MARGIN	HONSHU ARC / NORTHEASTERN HONSHU ARC / HOKKAIDO / YOTEI		42.8	42.8	140.6	140.6	SAE			s_013-27-GR17 [20534]	NOT GIVEN [20534]									VOL					GL [20534]	70.93			14.67				2.65	2.59	0.28	0.11		1.97	5.37	0.14
[20534]	CONVERGENT MARGIN	HONSHU ARC / NORTHEASTERN HONSHU ARC / HOKKAIDO / YOTEI		42.8	42.8	140.6	140.6	SAE			s_001-12-WH1 [20534]	NOT GIVEN [20534]									VOL					GL [20534]	68.04			14.9				3.83	2.93	0.82	0.19		1.79	5.01	0.13
[20534]	CONVERGENT MARGIN	HONSHU ARC / NORTHEASTERN HONSHU ARC / HOKKAIDO / YOTEI		42.8	42.8	140.6	140.6	SAE			s_001-12-WH2 [20534]	NOT GIVEN [20534]									VOL					GL [20534]	66.5			14.55				3.7	2.98	0.81	0.19		1.73	4.8	0.14
[20534]	CONVERGENT MARGIN	HONSHU ARC / NORTHEASTERN HONSHU ARC / HOKKAIDO / YOTEI		42.8	42.8	140.6	140.6	SAE			s_001-12-WH3 [20534]	NOT GIVEN [20534]									VOL					GL [20534]	67.82			14.95				3.88	3.07	0.83	0.19		1.82	4.95	0.11
[20534]	CONVERGENT MARGIN	HONSHU ARC / NORTHEASTERN HONSHU ARC / HOKKAIDO / YOTEI		42.8	42.8	140.6	140.6	SAE			s_001-12-WH7 [20534]	NOT GIVEN [20534]									VOL					GL [20534]	68.54			14.89				3.87	2.94	0.8	0.19		1.84	4.96	0.07
[20534]	CONVERGENT MARGIN	HONSHU ARC / NORTHEASTERN HONSHU ARC / HOKKAIDO / YOTEI		42.8	42.8	140.6	140.6	SAE			s_001-12-WH8 [20534]	NOT GIVEN [20534]									VOL					GL [20534]	67.63			14.92				3.8	2.97	0.83	0.22		1.78	4.9	0.1
[20534]	CONVERGENT MARGIN	HONSHU ARC / NORTHEASTERN HONSHU ARC / HOKKAIDO / YOTEI		42.8	42.8	140.6	140.6	SAE			s_001-12-WH9 [20534]	NOT GIVEN [20534]									VOL					GL [20534]	67.91			14.89				3.67	3.02	0.83	0.17		1.77	5.04	0.13
[20534]	CONVERGENT MARGIN	HONSHU ARC / NORTHEASTERN HONSHU ARC / HOKKAIDO / YOTEI		42.8	42.8	140.6	140.6	SAE			s_001-12-WH10 [20534]	NOT GIVEN [20534]									VOL					GL [20534]	67.76			14.69				3.79	2.96	0.8	0.16		1.84	4.8	0.13
[20534]	CONVERGENT MARGIN	HONSHU ARC / NORTHEASTERN HONSHU ARC / HOKKAIDO / YOTEI		42.8	42.8	140.6	140.6	SAE			s_001-12-WH12 [20534]	NOT GIVEN [20534]									VOL					GL [20534]	68			14.77				3.74	3.01	0.8	0.15		1.82	4.63	0.11
[20534]	CONVERGENT MARGIN	HONSHU ARC / NORTHEASTERN HONSHU ARC / HOKKAIDO / YOTEI		42.8	42.8	140.6	140.6	SAE			s_001-12-WH13 [20534]	NOT GIVEN [20534]									VOL					GL [20534]	65.01			14.28				3.62	2.9	0.78	0.17		1.74	4.85	0.1
[20534]	CONVERGENT MARGIN	HONSHU ARC / NORTHEASTERN HONSHU ARC / HOKKAIDO / YOTEI		42.8	42.8	140.6	140.6	SAE			s_001-12-WH14 [20534]	NOT GIVEN [20534]									VOL					GL [20534]	68.11			14.83				3.75	3.08	0.83	0.19		1.82	4.83	0.12
[20534]	CONVERGENT MARGIN	HONSHU ARC / NORTHEASTERN HONSHU ARC / HOKKAIDO / YOTEI		42.8	42.8	140.6	140.6	SAE			s_001-12-WH15 [20534]	NOT GIVEN [20534]									VOL					GL [20534]	66.1			14.67				3.79	2.93	0.8	0.2		1.79	4.77	0.1
[20534]	CONVERGENT MARGIN	HONSHU ARC / NORTHEASTERN HONSHU ARC / HOKKAIDO / YOTEI		42.8	42.8	140.6	140.6	SAE			s_001-12-GR2 [20534]	NOT GIVEN [20534]									VOL					GL [20534]	67.37			15.64				4.58	3.65	1.37	0.26		1.52	5.37	0.08
[20534]	CONVERGENT MARGIN	HONSHU ARC / NORTHEASTERN HONSHU ARC / HOKKAIDO / YOTEI		42.8	42.8	140.6	140.6	SAE			s_001-12-GR3 [20534]	NOT GIVEN [20534]									VOL					GL [20534]	67.67			14.05				4.46	2.82	1.17	0.2		1.8	5.11	0.14
[20534]	CONVERGENT MARGIN	HONSHU ARC / NORTHEASTERN HONSHU ARC / HOKKAIDO / YOTEI		42.8	42.8	140.6	140.6	SAE			s_001-12-GR4 [20534]	NOT GIVEN [20534]									VOL					GL [20534]	69.49			14.89				2.99	2.66	0.26	0.11		1.95	5.16	0.11
[20534]	CONVERGENT MARGIN	HONSHU ARC / NORTHEASTERN HONSHU ARC / HOKKAIDO / YOTEI		42.8	42.8	140.6	140.6	SAE			s_001-12-GR5 [20534]	NOT GIVEN [20534]									VOL					GL [20534]	70.17			12.82				4.32	2.11	0.74	0.22		2.19	4.67	0.15
[20534]	CONVERGENT MARGIN	HONSHU ARC / NORTHEASTERN HONSHU ARC / HOKKAIDO / YOTEI		42.8	42.8	140.6	140.6	SAE			s_001-12-GR6 [20534]	NOT GIVEN [20534]									VOL					GL [20534]	68.06			15.59				2.74	3.07	0.25	0.08		1.76	5.57	0.13
[20534]	CONVERGENT MARGIN	HONSHU ARC / NORTHEASTERN HONSHU ARC / HOKKAIDO / YOTEI		42.8	42.8	140.6	140.6	SAE			s_001-12-GR8 [20534]	NOT GIVEN [20534]									VOL					GL [20534]	68.13			15.98				3.34	3.37	0.57	0.09		1.54	5.56	0.08
[20534]	CONVERGENT MARGIN	HONSHU ARC / NORTHEASTERN HONSHU ARC / HOKKAIDO / YOTEI		42.8	42.8	140.6	140.6	SAE			s_001-12-GR9 [20534]	NOT GIVEN [20534]									VOL					GL [20534]	68.06			15.27				3.29	2.98	0.54	0.15		1.88	5.44	0.1
[20534]	CONVERGENT MARGIN	HONSHU ARC / NORTHEASTERN HONSHU ARC / HOKKAIDO / YOTEI		42.8	42.8	140.6	140.6	SAE			s_001-12-GR11 [20534]	NOT GIVEN [20534]									VOL					GL [20534]	68.67			14.62				3.51	2.82	0.62	0.17		1.9	5.31	0.14
[20534]	CONVERGENT MARGIN	HONSHU ARC / NORTHEASTERN HONSHU ARC / HOKKAIDO / YOTEI		42.8	42.8	140.6	140.6	SAE			s_001-12-GR12 [20534]	NOT GIVEN [20534]									VOL					GL [20534]	68.63			14.65				3.54	2.71	0.52	0.16		1.99	5.26	0.11
[20534]	CONVERGENT MARGIN	HONSHU ARC / NORTHEASTERN HONSHU ARC / HOKKAIDO / YOTEI		42.8	42.8	140.6	140.6	SAE			s_001-12-GR13 [20534]	NOT GIVEN [20534]									VOL					GL [20534]	68.58			13.74				4.78	2.8	1.36	0.26		1.85	4.79	0.12
[20534]	CONVERGENT MARGIN	HONSHU ARC / NORTHEASTERN HONSHU ARC / HOKKAIDO / YOTEI		42.8	42.8	140.6	140.6	SAE			s_001-12-GR15 [20534]	NOT GIVEN [20534]									VOL					GL [20534]	70.57			14.21				3.26	2.5	0.4	0.13		2.13	5.21	0.14
[20534]	CONVERGENT MARGIN	HONSHU ARC / NORTHEASTERN HONSHU ARC / HOKKAIDO / YOTEI		42.8	42.8	140.6	140.6	SAE			s_001-13-WH1 [20534]	NOT GIVEN [20534]									VOL					GL [20534]	68.97			14.91				3.87	3	0.83	0.23		1.81	4.99	0.11
[20534]	CONVERGENT MARGIN	HONSHU ARC / NORTHEASTERN HONSHU ARC / HOKKAIDO / YOTEI		42.8	42.8	140.6	140.6	SAE			s_001-13-WH2 [20534]	NOT GIVEN [20534]									VOL					GL [20534]	66.48			14.64				3.81	3.02	0.85	0.15		1.67	4.94	0.12
[20534]	CONVERGENT MARGIN	HONSHU ARC / NORTHEASTERN HONSHU ARC / HOKKAIDO / YOTEI		42.8	42.8	140.6	140.6	SAE			s_001-13-WH3 [20534]	NOT GIVEN [20534]									VOL					GL [20534]	65.94			14.65				3.59	2.91	0.76	0.17		1.77	4.82	0.12
[20534]	CONVERGENT MARGIN	HONSHU ARC / NORTHEASTERN HONSHU ARC / HOKKAIDO / YOTEI		42.8	42.8	140.6	140.6	SAE			s_001-13-WH4 [20534]	NOT GIVEN [20534]									VOL					GL [20534]	68.93			14.85				3.77	2.91	0.84	0.18		1.82	5.17	0.11
[20534]	CONVERGENT MARGIN	HONSHU ARC / NORTHEASTERN HONSHU ARC / HOKKAIDO / YOTEI		42.8	42.8	140.6	140.6	SAE			s_001-13-WH5 [20534]	NOT GIVEN [20534]									VOL					GL [20534]	68.32			14.89				3.78	3.01	0.8	0.17		1.85	5.01	0.11
[20534]	CONVERGENT MARGIN	HONSHU ARC / NORTHEASTERN HONSHU ARC / HOKKAIDO / YOTEI		42.8	42.8	140.6	140.6	SAE			s_001-13-WH6 [20534]	NOT GIVEN [20534]									VOL					GL [20534]	69.25			15.15				3.81	3.04	0.84	0.21		1.83	5.45	0.11
[20534]	CONVERGENT MARGIN	HONSHU ARC / NORTHEASTERN HONSHU ARC / HOKKAIDO / YOTEI		42.8	42.8	140.6	140.6	SAE			s_001-13-WH7 [20534]	NOT GIVEN [20534]									VOL					GL [20534]	68.64			14.87				3.79	2.94	0.89	0.15		1.79	5.06	0.12
[20534]	CONVERGENT MARGIN	HONSHU ARC / NORTHEASTERN HONSHU ARC / HOKKAIDO / YOTEI		42.8	42.8	140.6	140.6	SAE			s_001-13-WH8 [20534]	NOT GIVEN [20534]									VOL					GL [20534]	69.08			15.13				3.73	2.99	0.85	0.1		1.78	5.29	0.13
[20534]	CONVERGENT MARGIN	HONSHU ARC / NORTHEASTERN HONSHU ARC / HOKKAIDO / YOTEI		42.8	42.8	140.6	140.6	SAE			s_001-13-WH10 [20534]	NOT GIVEN [20534]									VOL					GL [20534]	65.74			14.37				3.81	2.85	0.79	0.12		1.84	4.89	0.14
[20534]	CONVERGENT MARGIN	HONSHU ARC / NORTHEASTERN HONSHU ARC / HOKKAIDO / YOTEI		42.8	42.8	140.6	140.6	SAE			s_001-13-WH11 [20534]	NOT GIVEN [20534]									VOL					GL [20534]	66.67			14.52				3.76	2.94	0.78	0.16		1.76	5.05	0.14
[20534]	CONVERGENT MARGIN	HONSHU ARC / NORTHEASTERN HONSHU ARC / HOKKAIDO / YOTEI		42.8	42.8	140.6	140.6	SAE			s_001-13-WH12 [20534]	NOT GIVEN [20534]									VOL					GL [20534]	68.47			14.71				3.82	2.94	0.87	0.2		1.81	4.95	0.12
[20534]	CONVERGENT MARGIN	HONSHU ARC / NORTHEASTERN HONSHU ARC / HOKKAIDO / YOTEI		42.8	42.8	140.6	140.6	SAE			s_001-13-WH15 [20534]	NOT GIVEN [20534]									VOL					GL [20534]	65.77			14.58				3.74	2.88	0.82	0.19		1.73	4.96	0.16
[20534]	CONVERGENT MARGIN	HONSHU ARC / NORTHEASTERN HONSHU ARC / HOKKAIDO / YOTEI		42.8	42.8	140.6	140.6	SAE			s_001-13-WH16 [20534]	NOT GIVEN [20534]									VOL					GL [20534]	67.06			14.55				3.66	2.99	0.81	0.17		1.8	4.85	0.11
[20534]	CONVERGENT MARGIN	HONSHU ARC / NORTHEASTERN HONSHU ARC / HOKKAIDO / YOTEI		42.8	42.8	140.6	140.6	SAE			s_001-14-GR9 [20534]	NOT GIVEN [20534]									VOL					GL [20534]	65.35			14.65				5.45	3.85	1.77	0.19		1.69	4.91	0.34
[20534]	CONVERGENT MARGIN	HONSHU ARC / NORTHEASTERN HONSHU ARC / HOKKAIDO / YOTEI		42.8	42.8	140.6	140.6	SAE			s_001-14-GR14 [20534]	NOT GIVEN [20534]									VOL					GL [20534]	65.41			14.64				5.07	3.92	1.58	0.21		1.61	5.02	0.35
[20534]	CONVERGENT MARGIN	HONSHU ARC / NORTHEASTERN HONSHU ARC / HOKKAIDO / YOTEI		42.8	42.8	140.6	140.6	SAE			s_001-14-GR15 [20534]	NOT GIVEN [20534]									VOL					GL [20534]	66			14.53				5.28	3.85	1.49	0.23		1.72	4.93	0.41
[20534]	CONVERGENT MARGIN	HONSHU ARC / NORTHEASTERN HONSHU ARC / HOKKAIDO / YOTEI		42.8	42.8	140.6	140.6	SAE			s_001-14-GR16 [20534]	NOT GIVEN [20534]									VOL					GL [20534]	66.18			14.44				5.56	3.76	1.56	0.27		1.68	4.6	0.39
[20534]	CONVERGENT MARGIN	HONSHU ARC / NORTHEASTERN HONSHU ARC / HOKKAIDO / YOTEI		42.8	42.8	140.6	140.6	SAE			s_001-11-GR1 [20534]	NOT GIVEN [20534]									VOL					GL [20534]	66.91	0.74		14.83				4.08	3.57	0.68	0.13		1.86	4.99	0.25
[20534]	CONVERGENT MARGIN	HONSHU ARC / NORTHEASTERN HONSHU ARC / HOKKAIDO / YOTEI		42.8	42.8	140.6	140.6	SAE			s_001-11-GR5 [20534]	NOT GIVEN [20534]									VOL					GL [20534]	64.26	0.6		15.53				5.18	4.64	1.82	0.23		1.5	4.95	0.44
[20534]	CONVERGENT MARGIN	HONSHU ARC / NORTHEASTERN HONSHU ARC / HOKKAIDO / YOTEI		42.8	42.8	140.6	140.6	SAE			s_001-11-GR7 [20534]	NOT GIVEN [20534]									VOL					GL [20534]	66.63	0.77		14.48				4.32	3.44	0.63	0.18		1.93	4.76	0.24
[20534]	CONVERGENT MARGIN	HONSHU ARC / NORTHEASTERN HONSHU ARC / HOKKAIDO / YOTEI		42.8	42.8	140.6	140.6	SAE			s_001-11-GR8 [20534]	NOT GIVEN [20534]									VOL					GL [20534]	64.4	0.61		16.09				4.04	4.42	0.95	0.18		1.52	4.89	0.23
[20534]	CONVERGENT MARGIN	HONSHU ARC / NORTHEASTERN HONSHU ARC / HOKKAIDO / YOTEI		42.8	42.8	140.6	140.6	SAE			s_001-11-GR9 [20534]	NOT GIVEN [20534]									VOL					GL [20534]	67.77	0.79		13.27				4.91	3.13	0.87	0.2		2.09	4.68	0.45
[20534]	CONVERGENT MARGIN	HONSHU ARC / NORTHEASTERN HONSHU ARC / HOKKAIDO / YOTEI		42.8	42.8	140.6	140.6	SAE			s_001-11-GR11 [20534]	NOT GIVEN [20534]									VOL					GL [20534]	65.34	0.62		16.51				3.55	4.48	0.57	0.13		1.58	5.25	0.35
[20534]	CONVERGENT MARGIN	HONSHU ARC / NORTHEASTERN HONSHU ARC / HOKKAIDO / YOTEI		42.8	42.8	140.6	140.6	SAE			s_001-11-GR13 [20534]	NOT GIVEN [20534]									VOL					GL [20534]	67.2	0.72		14.97				4.14	3.59	0.6	0.13		1.94	4.91	0.23
[20534]	CONVERGENT MARGIN	HONSHU ARC / NORTHEASTERN HONSHU ARC / HOKKAIDO / YOTEI		42.8	42.8	140.6	140.6	SAE			s_001-10-GL1 [20534]	NOT GIVEN [20534]									VOL					GL [20534]	61.55	1.05		16.11				6.08	5.36	1.81	0.18		1.17	4.68	0.5
[20534]	CONVERGENT MARGIN	HONSHU ARC / NORTHEASTERN HONSHU ARC / HOKKAIDO / YOTEI		42.8	42.8	140.6	140.6	SAE			s_001-10-GL2 [20534]	NOT GIVEN [20534]									VOL					GL [20534]	62.74	1.37		14.17				7.32	4.54	1.44	0.2		1.33	4.84	0.58
[20534]	CONVERGENT MARGIN	HONSHU ARC / NORTHEASTERN HONSHU ARC / HOKKAIDO / YOTEI		42.8	42.8	140.6	140.6	SAE			s_001-10-GL4 [20534]	NOT GIVEN [20534]									VOL					GL [20534]	63.83	1.39		14.53				6.77	4.65	0.97	0.21		1.37	4.78	0.61
[20534]	CONVERGENT MARGIN	HONSHU ARC / NORTHEASTERN HONSHU ARC / HOKKAIDO / YOTEI		42.8	42.8	140.6	140.6	SAE			s_001-10-GL6 [20534]	NOT GIVEN [20534]									VOL					GL [20534]	61.27	0.93		17.5				5.46	6.02	1.68	0.19		1.06	5.02	0.41
[20534]	CONVERGENT MARGIN	HONSHU ARC / NORTHEASTERN HONSHU ARC / HOKKAIDO / YOTEI		42.8	42.8	140.6	140.6	SAE			s_001-10-GL7 [20534]	NOT GIVEN [20534]									VOL					GL [20534]	62.69	0.96		17.29				5.85	5.74	1.41	0.2		1.12	5.17	0.48
[20534]	CONVERGENT MARGIN	HONSHU ARC / NORTHEASTERN HONSHU ARC / HOKKAIDO / YOTEI		42.8	42.8	140.6	140.6	SAE			s_001-10-GL8 [20534]	NOT GIVEN [20534]									VOL					GL [20534]	63.65	0.98		17.15				5.23	5.7	1.02	0.19		1.17	5.12	0.48
[20534]	CONVERGENT MARGIN	HONSHU ARC / NORTHEASTERN HONSHU ARC / HOKKAIDO / YOTEI		42.8	42.8	140.6	140.6	SAE			s_001-10-GL10 [20534]	NOT GIVEN [20534]									VOL					GL [20534]	63.2	1.29		13.7				7.17	4.69	1.75	0.25		1.33	4.74	0.57
[20534]	CONVERGENT MARGIN	HONSHU ARC / NORTHEASTERN HONSHU ARC / HOKKAIDO / YOTEI		42.8	42.8	140.6	140.6	SAE			s_001-10-GL11 [20534]	NOT GIVEN [20534]									VOL					GL [20534]	62.69	1.21		13.9				8.31	4.91	2.89	0.32		1.19	4.46	0.5
[20534]	CONVERGENT MARGIN	HONSHU ARC / NORTHEASTERN HONSHU ARC / HOKKAIDO / YOTEI		42.8	42.8	140.6	140.6	SAE			s_001-10-GL12 [20534]	NOT GIVEN [20534]									VOL					GL [20534]	61.7	1.2		15.36				6.97	5.4	1.7	0.22		1.29	4.63	0.64
[20534]	CONVERGENT MARGIN	HONSHU ARC / NORTHEASTERN HONSHU ARC / HOKKAIDO / YOTEI		42.8	42.8	140.6	140.6	SAE			s_001-10-BLSCO4 [20534]	NOT GIVEN [20534]									VOL					GL [20534]	60.87	1.05		16.67				6.75	6.03	1.94	0.25		1.12	4.86	0.51
[20534]	CONVERGENT MARGIN	HONSHU ARC / NORTHEASTERN HONSHU ARC / HOKKAIDO / YOTEI		42.8	42.8	140.6	140.6	SAE			s_001-10-BLSCO6 [20534]	NOT GIVEN [20534]									VOL					GL [20534]	60.98	1.01		15.1				7.5	5.68	2.59	0.27		1.15	4.67	0.54
[20534]	CONVERGENT MARGIN	HONSHU ARC / NORTHEASTERN HONSHU ARC / HOKKAIDO / YOTEI		42.8	42.8	140.6	140.6	SAE			s_001-10-BLSCO7 [20534]	NOT GIVEN [20534]									VOL					GL [20534]	60.47	1.16		15.24				7.19	5.62	1.85	0.23		1.13	4.87	0.55
[20534]	CONVERGENT MARGIN	HONSHU ARC / NORTHEASTERN HONSHU ARC / HOKKAIDO / YOTEI		42.8	42.8	140.6	140.6	SAE			s_001-10-BLSCO8 [20534]	NOT GIVEN [20534]									VOL					GL [20534]	61.15	1.04		16.44				6.88	5.9	1.78	0.25		1.09	4.98	0.5
[20534]	CONVERGENT MARGIN	HONSHU ARC / NORTHEASTERN HONSHU ARC / HOKKAIDO / YOTEI		42.8	42.8	140.6	140.6	SAE			s_001-10-BLSCO9 [20534]	NOT GIVEN [20534]									VOL					GL [20534]	62.49	1.21		15.13				6.82	5.18	1.47	0.2		1.36	5.17	0.63
[20534]	CONVERGENT MARGIN	HONSHU ARC / NORTHEASTERN HONSHU ARC / HOKKAIDO / YOTEI		42.8	42.8	140.6	140.6	SAE			s_001-9-BR-GR4 [20534]	NOT GIVEN [20534]									VOL					GL [20534]	62.25	0.69		15.39				4.97	4.71	1.34	0.17		1.34	4.6	0.37
[20534]	CONVERGENT MARGIN	HONSHU ARC / NORTHEASTERN HONSHU ARC / HOKKAIDO / YOTEI		42.8	42.8	140.6	140.6	SAE			s_001-9-BR-GR10 [20534]	NOT GIVEN [20534]									VOL					GL [20534]	63.96	0.86		16.18				5.14	5.05	1.23	0.19		1.38	5.08	0.41
[20534]	CONVERGENT MARGIN	HONSHU ARC / NORTHEASTERN HONSHU ARC / HOKKAIDO / YOTEI		42.8	42.8	140.6	140.6	SAE			s_001-9-BLSCO8 [20534]	NOT GIVEN [20534]									VOL					GL [20534]	63.96	0.93		15.48				5.94	5.01	1.54	0.21		1.33	5.17	0.44
[20534]	CONVERGENT MARGIN	HONSHU ARC / NORTHEASTERN HONSHU ARC / HOKKAIDO / YOTEI		42.8	42.8	140.6	140.6	SAE			s_001-9-BLSCO11 [20534]	NOT GIVEN [20534]									VOL					GL [20534]	62.31	0.84		16.69				5.8	5.76	1.62	0.24		1.09	5.16	0.43
[20534]	CONVERGENT MARGIN	HONSHU ARC / NORTHEASTERN HONSHU ARC / HOKKAIDO / YOTEI		42.8	42.8	140.6	140.6	SAE			s_001-9-BLSCO14 [20534]	NOT GIVEN [20534]									VOL					GL [20534]	62.63	0.99		16.38				5.51	5.17	0.82	0.17		1.25	5.28	0.37
[20534]	CONVERGENT MARGIN	HONSHU ARC / NORTHEASTERN HONSHU ARC / HOKKAIDO / YOTEI		42.8	42.8	140.6	140.6	SAE			s_070924-1-5-GL1 [20534]	NOT GIVEN [20534]									VOL					GL [20534]	68.54	1.03		14.21				5.11	3.62	0.69	0.17		1.94	4.52	0.54
[20534]	CONVERGENT MARGIN	HONSHU ARC / NORTHEASTERN HONSHU ARC / HOKKAIDO / YOTEI		42.8	42.8	140.6	140.6	SAE			s_070924-1-5-GL2 [20534]	NOT GIVEN [20534]									VOL					GL [20534]	69.08	1.04		13.15				5.4	2.84	0.65	0.23		2.09	4.27	0.44
[20534]	CONVERGENT MARGIN	HONSHU ARC / NORTHEASTERN HONSHU ARC / HOKKAIDO / YOTEI		42.8	42.8	140.6	140.6	SAE			s_070924-1-5-GL3 [20534]	NOT GIVEN [20534]									VOL					GL [20534]	68.25	0.89		15.12				4.65	3.87	0.6	0.12		1.77	4.87	0.4
[20534]	CONVERGENT MARGIN	HONSHU ARC / NORTHEASTERN HONSHU ARC / HOKKAIDO / YOTEI		42.8	42.8	140.6	140.6	SAE			s_070924-1-5-GL4 [20534]	NOT GIVEN [20534]									VOL					GL [20534]	69.75	1.21		12.44				6.24	2.76	0.79	0.22		2.18	4.22	0.41
[20534]	CONVERGENT MARGIN	HONSHU ARC / NORTHEASTERN HONSHU ARC / HOKKAIDO / YOTEI		42.8	42.8	140.6	140.6	SAE			s_070924-1-5-GL5 [20534]	NOT GIVEN [20534]									VOL					GL [20534]	68.09	1.24		13.52				5.93	3.29	0.65	0.18		1.99	4.64	0.47
[20534]	CONVERGENT MARGIN	HONSHU ARC / NORTHEASTERN HONSHU ARC / HOKKAIDO / YOTEI		42.8	42.8	140.6	140.6	SAE			s_070924-1-5-GL6 [20534]	NOT GIVEN [20534]									VOL					GL [20534]	68.48	0.9		14.44				4.79	3.58	0.62	0.22		1.94	4.59	0.42
[20534]	CONVERGENT MARGIN	HONSHU ARC / NORTHEASTERN HONSHU ARC / HOKKAIDO / YOTEI		42.8	42.8	140.6	140.6	SAE			s_070924-1-5-GL7 [20534]	NOT GIVEN [20534]									VOL					GL [20534]	68.25	1.2		12.95				6.29	3.15	0.82	0.23		2.07	4.32	0.57
[20534]	CONVERGENT MARGIN	HONSHU ARC / NORTHEASTERN HONSHU ARC / HOKKAIDO / YOTEI		42.8	42.8	140.6	140.6	SAE			s_070924-1-5-GL8 [20534]	NOT GIVEN [20534]									VOL					GL [20534]	68.77	1.13		13.25				5.64	3.2	0.82	0.2		2.1	4.4	0.4
[20534]	CONVERGENT MARGIN	HONSHU ARC / NORTHEASTERN HONSHU ARC / HOKKAIDO / YOTEI		42.8	42.8	140.6	140.6	SAE			s_070924-1-5-GL9 [20534]	NOT GIVEN [20534]									VOL					GL [20534]	68.98	1.05		14.02				5.53	3.5	0.93	0.19		1.88	4.28	0.47
[20534]	CONVERGENT MARGIN	HONSHU ARC / NORTHEASTERN HONSHU ARC / HOKKAIDO / YOTEI		42.8	42.8	140.6	140.6	SAE			s_070924-1-5-GL10 [20534]	NOT GIVEN [20534]									VOL					GL [20534]	70.1	0.96		13				5.6	3.06	0.82	0.21		2.09	4.32	0.57
[20534]	CONVERGENT MARGIN	HONSHU ARC / NORTHEASTERN HONSHU ARC / HOKKAIDO / YOTEI		42.8	42.8	140.6	140.6	SAE			s_070924-1-4-GL1 [20534]	NOT GIVEN [20534]									VOL					GL [20534]	66.73	1.01		13.85				6.69	3.79	1.68	0.23		1.77	4.15	0.3
[20534]	CONVERGENT MARGIN	HONSHU ARC / NORTHEASTERN HONSHU ARC / HOKKAIDO / YOTEI		42.8	42.8	140.6	140.6	SAE			s_070924-1-4-GL2 [20534]	NOT GIVEN [20534]									VOL					GL [20534]	65.66	0.92		14.6				6.29	3.85	1.5	0.26		1.75	4.35	0.3
[20534]	CONVERGENT MARGIN	HONSHU ARC / NORTHEASTERN HONSHU ARC / HOKKAIDO / YOTEI		42.8	42.8	140.6	140.6	SAE			s_070924-1-4-GL3 [20534]	NOT GIVEN [20534]									VOL					GL [20534]	63.72	0.99		13.45				6.45	3.79	1.61	0.22		1.75	4.14	0.33
[20534]	CONVERGENT MARGIN	HONSHU ARC / NORTHEASTERN HONSHU ARC / HOKKAIDO / YOTEI		42.8	42.8	140.6	140.6	SAE			s_070924-1-4-GL4 [20534]	NOT GIVEN [20534]									VOL					GL [20534]	64.92	0.99		14.04				6.49	3.92	1.57	0.25		1.77	4.31	0.31
[20534]	CONVERGENT MARGIN	HONSHU ARC / NORTHEASTERN HONSHU ARC / HOKKAIDO / YOTEI		42.8	42.8	140.6	140.6	SAE			s_070924-1-4-GL5 [20534]	NOT GIVEN [20534]									VOL					GL [20534]	66.56	0.96		14.03				6.62	3.92	1.61	0.26		1.84	4.3	0.37
[20534]	CONVERGENT MARGIN	HONSHU ARC / NORTHEASTERN HONSHU ARC / HOKKAIDO / YOTEI		42.8	42.8	140.6	140.6	SAE			s_070924-1-3-GL2 [20534]	NOT GIVEN [20534]									VOL					GL [20534]	61.25	1.26		14.1				7.89	4.94	2.42	0.19		1.44	4.31	0.6
[20534]	CONVERGENT MARGIN	HONSHU ARC / NORTHEASTERN HONSHU ARC / HOKKAIDO / YOTEI		42.8	42.8	140.6	140.6	SAE			s_070924-1-3-GL4 [20534]	NOT GIVEN [20534]									VOL					GL [20534]	62	1.25		16.18				6.91	5.4	1.71	0.23		1.29	4.91	0.39
[20534]	CONVERGENT MARGIN	HONSHU ARC / NORTHEASTERN HONSHU ARC / HOKKAIDO / YOTEI		42.8	42.8	140.6	140.6	SAE			s_070924-1-3-GL6 [20534]	NOT GIVEN [20534]									VOL					GL [20534]	60.42	0.94		16.71				6.18	6.25	2.03	0.23		1.04	4.72	0.53
[20534]	CONVERGENT MARGIN	HONSHU ARC / NORTHEASTERN HONSHU ARC / HOKKAIDO / YOTEI		42.8	42.8	140.6	140.6	SAE			s_070924-1-3-GL7 [20534]	NOT GIVEN [20534]									VOL					GL [20534]	63.16	0.91		15.14				6.33	5.66	2.29	0.2		1.34	4.74	0.6
[20534]	CONVERGENT MARGIN	HONSHU ARC / NORTHEASTERN HONSHU ARC / HOKKAIDO / YOTEI		42.8	42.8	140.6	140.6	SAE			s_070924-1-3-GL9 [20534]	NOT GIVEN [20534]									VOL					GL [20534]	63.61	1		15.01				6.22	4.81	1.79	0.18		1.43	4.72	0.38
[20534]	CONVERGENT MARGIN	HONSHU ARC / NORTHEASTERN HONSHU ARC / HOKKAIDO / YOTEI		42.8	42.8	140.6	140.6	SAE			s_070924-1-3-GL10 [20534]	NOT GIVEN [20534]									VOL					GL [20534]	63.57	1.17		16.44				5.76	5	0.72	0.15		1.44	5.09	0.56
[20534]	CONVERGENT MARGIN	HONSHU ARC / NORTHEASTERN HONSHU ARC / HOKKAIDO / YOTEI		42.8	42.8	140.6	140.6	SAE			s_070924-1-3-GL16 [20534]	NOT GIVEN [20534]									VOL					GL [20534]	64.54	1.45		12.56				7.68	4.25	1.45	0.29		1.89	3.55	0.63
[20534]	CONVERGENT MARGIN	HONSHU ARC / NORTHEASTERN HONSHU ARC / HOKKAIDO / YOTEI		42.8	42.8	140.6	140.6	SAE			s_070924-1-3-GL17 [20534]	NOT GIVEN [20534]									VOL					GL [20534]	60.98	1.15		16.45				5.9	5.82	1.07	0.19		1.25	4.5	0.5
[20534]	CONVERGENT MARGIN	HONSHU ARC / NORTHEASTERN HONSHU ARC / HOKKAIDO / YOTEI		42.8	42.8	140.6	140.6	SAE			s_070924-1-3-GL18 [20534]	NOT GIVEN [20534]									VOL					GL [20534]	62.35	1.32		13.33				7.67	4.5	2.39	0.27		1.62	3.99	0.54
[20534]	CONVERGENT MARGIN	HONSHU ARC / NORTHEASTERN HONSHU ARC / HOKKAIDO / YOTEI		42.8	42.8	140.6	140.6	SAE			s_070924-1-1-GRSCO5 [20534]	NOT GIVEN [20534]									VOL					GL [20534]	68.31	0.53		13.87				3.71	2.57	0.56	0.15		1.87	5.18	0.15
[20534]	CONVERGENT MARGIN	HONSHU ARC / NORTHEASTERN HONSHU ARC / HOKKAIDO / YOTEI		42.8	42.8	140.6	140.6	SAE			s_070924-1-1-GRSCO6 [20534]	NOT GIVEN [20534]									VOL					GL [20534]	72.12	0.56		13.82				3.34	2.32	0.36	0.14		2.08	5.17	0.17
[20534]	CONVERGENT MARGIN	HONSHU ARC / NORTHEASTERN HONSHU ARC / HOKKAIDO / YOTEI		42.8	42.8	140.6	140.6	SAE			s_070924-1-1-GRSCO7 [20534]	NOT GIVEN [20534]									VOL					GL [20534]	71.06	0.54		13.91				3.32	2.31	0.43	0.15		2.01	5.27	0.12
[20534]	CONVERGENT MARGIN	HONSHU ARC / NORTHEASTERN HONSHU ARC / HOKKAIDO / YOTEI		42.8	42.8	140.6	140.6	SAE			s_070924-1-1-GRSCO8 [20534]	NOT GIVEN [20534]									VOL					GL [20534]	69.32	0.53		14.9				3.09	2.74	0.36	0.13		1.84	5.53	0.13
[20534]	CONVERGENT MARGIN	HONSHU ARC / NORTHEASTERN HONSHU ARC / HOKKAIDO / YOTEI		42.8	42.8	140.6	140.6	SAE			s_070924-1-1-GRSCO9 [20534]	NOT GIVEN [20534]									VOL					GL [20534]	70.11	0.44		15.02				3.1	2.71	0.38	0.13		1.93	5.39	0.13
[20534]	CONVERGENT MARGIN	HONSHU ARC / NORTHEASTERN HONSHU ARC / HOKKAIDO / YOTEI		42.8	42.8	140.6	140.6	SAE			s_070924-1-1-GRSCO11 [20534]	NOT GIVEN [20534]									VOL					GL [20534]	70.68	0.46		14.82				2.91	2.76	0.29	0.14		1.9	5.3	0.13
[20534]	CONVERGENT MARGIN	HONSHU ARC / NORTHEASTERN HONSHU ARC / HOKKAIDO / YOTEI		42.8	42.8	140.6	140.6	SAE			s_070924-1-1-GRSCO12 [20534]	NOT GIVEN [20534]									VOL					GL [20534]	68.83	0.41		15.72				2.64	2.97	0.27	0.13		1.71	5.56	0.13
[20534]	CONVERGENT MARGIN	HONSHU ARC / NORTHEASTERN HONSHU ARC / HOKKAIDO / YOTEI		42.8	42.8	140.6	140.6	SAE			s_070924-1-1-GRSCO13 [20534]	NOT GIVEN [20534]									VOL					GL [20534]	70.34	0.51		14.5				3.5	2.66	0.42	0.18		1.99	5.26	0.14
[20534]	CONVERGENT MARGIN	HONSHU ARC / NORTHEASTERN HONSHU ARC / HOKKAIDO / YOTEI		42.8	42.8	140.6	140.6	SAE			s_070924-1-1-GRSCO16 [20534]	NOT GIVEN [20534]									VOL					GL [20534]	67.02	0.48		15.52				2.67	3.17	0.26	0.1		1.69	5.41	0.1
[20534]	CONVERGENT MARGIN	HONSHU ARC / NORTHEASTERN HONSHU ARC / HOKKAIDO / YOTEI		42.8	42.8	140.6	140.6	SAE			s_070924-1-1-GRSCO17 [20534]	NOT GIVEN [20534]									VOL					GL [20534]	68.52	0.45		14.54				2.68	2.63	0.16	0.1		1.91	5.09	0.13
[20534]	CONVERGENT MARGIN	HONSHU ARC / NORTHEASTERN HONSHU ARC / HOKKAIDO / YOTEI		42.8	42.8	140.6	140.6	SAE			s_070924-1-1-GRSCO18 [20534]	NOT GIVEN [20534]									VOL					GL [20534]	69.13	0.5		14.12				2.76	2.36	0.31	0.14		1.85	5.1	0.15
[20534]	CONVERGENT MARGIN	HONSHU ARC / NORTHEASTERN HONSHU ARC / HOKKAIDO / YOTEI		42.8	42.8	140.6	140.6	SAE			s_070924-1-1-GRSCO21 [20534]	NOT GIVEN [20534]									VOL					GL [20534]	69.25	0.47		15.55				3.36	2.94	0.47	0.15		1.72	5.48	0.11
[20534]	CONVERGENT MARGIN	HONSHU ARC / NORTHEASTERN HONSHU ARC / HOKKAIDO / YOTEI		42.8	42.8	140.6	140.6	SAE			s_001-8-WH3 [20534]	NOT GIVEN [20534]									VOL					GL [20534]	67	0.45		13.92				3.87	2.69	0.79	0.19		1.81	5.08	0.12
[20534]	CONVERGENT MARGIN	HONSHU ARC / NORTHEASTERN HONSHU ARC / HOKKAIDO / YOTEI		42.8	42.8	140.6	140.6	SAE			s_001-8-WH4 [20534]	NOT GIVEN [20534]									VOL					GL [20534]	69.19	0.54		14.62				3.93	2.81	0.75	0.2		1.79	5.17	0.13
[20534]	CONVERGENT MARGIN	HONSHU ARC / NORTHEASTERN HONSHU ARC / HOKKAIDO / YOTEI		42.8	42.8	140.6	140.6	SAE			s_001-8-WH5 [20534]	NOT GIVEN [20534]									VOL					GL [20534]	68.34	0.47		14.14				3.98	2.8	0.72	0.19		1.81	4.96	0.15
[20534]	CONVERGENT MARGIN	HONSHU ARC / NORTHEASTERN HONSHU ARC / HOKKAIDO / YOTEI		42.8	42.8	140.6	140.6	SAE			s_001-8-WH6 [20534]	NOT GIVEN [20534]									VOL					GL [20534]	69.13	0.54		14.45				3.87	2.89	0.71	0.19		1.82	5.06	0.13
[20534]	CONVERGENT MARGIN	HONSHU ARC / NORTHEASTERN HONSHU ARC / HOKKAIDO / YOTEI		42.8	42.8	140.6	140.6	SAE			s_001-8-WH7 [20534]	NOT GIVEN [20534]									VOL					GL [20534]	69.02	0.51		14.2				3.95	2.84	0.76	0.17		1.83	4.78	0.11
[20534]	CONVERGENT MARGIN	HONSHU ARC / NORTHEASTERN HONSHU ARC / HOKKAIDO / YOTEI		42.8	42.8	140.6	140.6	SAE			s_001-8-WH17 [20534]	NOT GIVEN [20534]									VOL					GL [20534]	68.32	0.47		14.28				3.76	2.83	0.7	0.19		1.74	5.1	0.11
[20534]	CONVERGENT MARGIN	HONSHU ARC / NORTHEASTERN HONSHU ARC / HOKKAIDO / YOTEI		42.8	42.8	140.6	140.6	SAE			s_001-8-LIGR2 [20534]	NOT GIVEN [20534]									VOL					GL [20534]	67.02	0.4		14.3				3.41	3	0.72	0.18		1.73	5.21	0.09
[20534]	CONVERGENT MARGIN	HONSHU ARC / NORTHEASTERN HONSHU ARC / HOKKAIDO / YOTEI		42.8	42.8	140.6	140.6	SAE			s_001-8-LIGR3 [20534]	NOT GIVEN [20534]									VOL					GL [20534]	69.25	0.49		14.58				3.02	2.73	0.33	0.08		1.77	5.24	0.12
[20534]	CONVERGENT MARGIN	HONSHU ARC / NORTHEASTERN HONSHU ARC / HOKKAIDO / YOTEI		42.8	42.8	140.6	140.6	SAE			s_001-8-LIGR4 [20534]	NOT GIVEN [20534]									VOL					GL [20534]	67.96	0.39		15.32				2.73	2.86	0.25	0.07		1.69	5.43	0.11
[20534]	CONVERGENT MARGIN	HONSHU ARC / NORTHEASTERN HONSHU ARC / HOKKAIDO / YOTEI		42.8	42.8	140.6	140.6	SAE			s_001-8-LIGR5 [20534]	NOT GIVEN [20534]									VOL					GL [20534]	69.53	0.39		15.1				2.83	2.83	0.26	0.07		1.85	5.26	0.1
[20534]	CONVERGENT MARGIN	HONSHU ARC / NORTHEASTERN HONSHU ARC / HOKKAIDO / YOTEI		42.8	42.8	140.6	140.6	SAE			s_001-8-LIGR7 [20534]	NOT GIVEN [20534]									VOL					GL [20534]	69.28	0.48		15.09				2.77	2.85	0.26	0.09		1.8	5.41	0.1
[20534]	CONVERGENT MARGIN	HONSHU ARC / NORTHEASTERN HONSHU ARC / HOKKAIDO / YOTEI		42.8	42.8	140.6	140.6	SAE			s_001-8-LIGR11 [20534]	NOT GIVEN [20534]									VOL					GL [20534]	68.22	0.48		13.96				3.24	2.48	0.36	0.1		1.91	4.93	0.13
[20534]	CONVERGENT MARGIN	HONSHU ARC / NORTHEASTERN HONSHU ARC / HOKKAIDO / YOTEI		42.8	42.8	140.6	140.6	SAE			s_001-8-LIGR14 [20534]	NOT GIVEN [20534]									VOL					GL [20534]	69.21	0.49		13.9				3.2	2.44	0.35	0.18		1.99	5.08	0.13
[20534]	CONVERGENT MARGIN	HONSHU ARC / NORTHEASTERN HONSHU ARC / HOKKAIDO / YOTEI		42.8	42.8	140.6	140.6	SAE			s_001-7-WH1 [20534]	NOT GIVEN [20534]									VOL					GL [20534]	66.66	0.54		15.15				3.7	3.26	0.78	0.13		1.56	5.01	0.1
[20534]	CONVERGENT MARGIN	HONSHU ARC / NORTHEASTERN HONSHU ARC / HOKKAIDO / YOTEI		42.8	42.8	140.6	140.6	SAE			s_001-7-WH5 [20534]	NOT GIVEN [20534]									VOL					GL [20534]	68.93	0.52		15.43				3.65	3.36	0.8	0.12		1.6	5.15	0.12
[20534]	CONVERGENT MARGIN	HONSHU ARC / NORTHEASTERN HONSHU ARC / HOKKAIDO / YOTEI		42.8	42.8	140.6	140.6	SAE			s_001-7-WH6 [20534]	NOT GIVEN [20534]									VOL					GL [20534]	67.86	0.53		15.76				3.22	3.52	0.7	0.12		1.44	5.25	0.12
[20534]	CONVERGENT MARGIN	HONSHU ARC / NORTHEASTERN HONSHU ARC / HOKKAIDO / YOTEI		42.8	42.8	140.6	140.6	SAE			s_001-7-WH8 [20534]	NOT GIVEN [20534]									VOL					GL [20534]	68.37	0.53		14.44				3.87	3.01	0.91	0.22		1.73	5.1	0.12
[20534]	CONVERGENT MARGIN	HONSHU ARC / NORTHEASTERN HONSHU ARC / HOKKAIDO / YOTEI		42.8	42.8	140.6	140.6	SAE			s_001-7-WH9 [20534]	NOT GIVEN [20534]									VOL					GL [20534]	68.11	0.55		14.59				3.91	3.01	0.89	0.18		1.77	4.98	0.14
[20534]	CONVERGENT MARGIN	HONSHU ARC / NORTHEASTERN HONSHU ARC / HOKKAIDO / YOTEI		42.8	42.8	140.6	140.6	SAE			s_001-7-WH10 [20534]	NOT GIVEN [20534]									VOL					GL [20534]	68.2	0.51		15.02				3.72	3.28	0.86	0.18		1.66	5.06	0.13
[20534]	CONVERGENT MARGIN	HONSHU ARC / NORTHEASTERN HONSHU ARC / HOKKAIDO / YOTEI		42.8	42.8	140.6	140.6	SAE			s_001-7-WH12 [20534]	NOT GIVEN [20534]									VOL					GL [20534]	68.24	0.56		14.29				4	2.92	0.91	0.13		1.72	4.67	0.11
[20534]	CONVERGENT MARGIN	HONSHU ARC / NORTHEASTERN HONSHU ARC / HOKKAIDO / YOTEI		42.8	42.8	140.6	140.6	SAE			s_001-7-WH14 [20534]	NOT GIVEN [20534]									VOL					GL [20534]	67.75	0.59		14.65				3.96	3.18	0.86	0.16		1.64	5.14	0.14
[20534]	CONVERGENT MARGIN	HONSHU ARC / NORTHEASTERN HONSHU ARC / HOKKAIDO / YOTEI		42.8	42.8	140.6	140.6	SAE			s_001-7-WH16 [20534]	NOT GIVEN [20534]									VOL					GL [20534]	68.78	0.57		14.3				4.07	2.91	0.84	0.2		1.78	4.78	0.15
[20534]	CONVERGENT MARGIN	HONSHU ARC / NORTHEASTERN HONSHU ARC / HOKKAIDO / YOTEI		42.8	42.8	140.6	140.6	SAE			s_001-7-BR-GR1 [20534]	NOT GIVEN [20534]									VOL					GL [20534]	67.67	0.52		15.66				3.68	3.32	0.84	0.21		1.54	5.32	0.12
[20534]	CONVERGENT MARGIN	HONSHU ARC / NORTHEASTERN HONSHU ARC / HOKKAIDO / YOTEI		42.8	42.8	140.6	140.6	SAE			s_001-7-BR-GR5 [20534]	NOT GIVEN [20534]									VOL					GL [20534]	68.67	0.51		15.29				3.45	3.27	0.6	0.12		1.66	5.24	0.14
[20534]	CONVERGENT MARGIN	HONSHU ARC / NORTHEASTERN HONSHU ARC / HOKKAIDO / YOTEI		42.8	42.8	140.6	140.6	SAE			s_001-7-BR-GR8 [20534]	NOT GIVEN [20534]									VOL					GL [20534]	68.94	0.58		14.31				3.95	2.88	0.79	0.2		1.82	5.11	0.14
[20534]	CONVERGENT MARGIN	HONSHU ARC / NORTHEASTERN HONSHU ARC / HOKKAIDO / YOTEI		42.8	42.8	140.6	140.6	SAE			s_001-7-BR-GR10 [20534]	NOT GIVEN [20534]									VOL					GL [20534]	70.41	0.59		14.25				3.88	2.64	0.65	0.21		1.86	5.07	0.16
[20534]	CONVERGENT MARGIN	HONSHU ARC / NORTHEASTERN HONSHU ARC / HOKKAIDO / YOTEI		42.8	42.8	140.6	140.6	SAE			s_001-7-BR-GR11 [20534]	NOT GIVEN [20534]									VOL					GL [20534]	67.75	0.55		15.14				3.44	3.14	0.55	0.13		1.66	5.16	0.12
[20534]	CONVERGENT MARGIN	HONSHU ARC / NORTHEASTERN HONSHU ARC / HOKKAIDO / YOTEI		42.8	42.8	140.6	140.6	SAE			s_001-7-BR-GR13 [20534]	NOT GIVEN [20534]									VOL					GL [20534]	68.53	0.54		16.14				3.21	3.52	0.38	0.14		1.61	5.49	0.15
[20534]	CONVERGENT MARGIN	HONSHU ARC / NORTHEASTERN HONSHU ARC / HOKKAIDO / YOTEI		42.8	42.8	140.6	140.6	SAE			s_001-7-BR-GR16 [20534]	NOT GIVEN [20534]									VOL					GL [20534]	68.46	0.55		15.47				3.24	3.13	0.45	0.15		1.66	5.42	0.15
[20534]	CONVERGENT MARGIN	HONSHU ARC / NORTHEASTERN HONSHU ARC / HOKKAIDO / YOTEI		42.8	42.8	140.6	140.6	SAE			s_001-7-BR-GR17 [20534]	NOT GIVEN [20534]									VOL					GL [20534]	68.18	0.48		16.2				3.78	3.96	0.92	0.2		1.52	5.62	0.11
[20534]	CONVERGENT MARGIN	HONSHU ARC / NORTHEASTERN HONSHU ARC / HOKKAIDO / YOTEI		42.8	42.8	140.6	140.6	SAE			s_001-6-GR5 [20534]	NOT GIVEN [20534]									VOL					GL [20534]	65.49	0.64		14.9				3.44	3.41	0.65	0.17		1.5	4.98	0.3
[20534]	CONVERGENT MARGIN	HONSHU ARC / NORTHEASTERN HONSHU ARC / HOKKAIDO / YOTEI		42.8	42.8	140.6	140.6	SAE			s_001-6-GR15 [20534]	NOT GIVEN [20534]									VOL					GL [20534]	66.91	0.66		15.68				3.79	3.63	0.94	0.17		1.55	5.07	0.26
[20534]	CONVERGENT MARGIN	HONSHU ARC / NORTHEASTERN HONSHU ARC / HOKKAIDO / YOTEI		42.8	42.8	140.6	140.6	SAE			s_001-6-GL3 [20534]	NOT GIVEN [20534]									VOL					GL [20534]	66.68	0.89		13.57				4.28	2.75	0.83	0.18		1.93	4.07	0.27
[20534]	CONVERGENT MARGIN	HONSHU ARC / NORTHEASTERN HONSHU ARC / HOKKAIDO / YOTEI		42.8	42.8	140.6	140.6	SAE			s_001-6-GL4 [20534]	NOT GIVEN [20534]									VOL					GL [20534]	64.55	0.72		16.13				3.79	3.7	0.93	0.19		1.53	5.19	0.19
[20534]	CONVERGENT MARGIN	HONSHU ARC / NORTHEASTERN HONSHU ARC / HOKKAIDO / YOTEI		42.8	42.8	140.6	140.6	SAE			s_001-6-GL5 [20534]	NOT GIVEN [20534]									VOL					GL [20534]	66.37	1.01		13.45				4.79	2.44	0.74	0.24		1.95	4.41	0.25
[20534]	CONVERGENT MARGIN	HONSHU ARC / NORTHEASTERN HONSHU ARC / HOKKAIDO / YOTEI		42.8	42.8	140.6	140.6	SAE			s_001-5-1-LIGR1 [20534]	NOT GIVEN [20534]									VOL					GL [20534]	69.39	0.53		15.17				3.89	3.17	0.83	0.17		1.82	4.69	0.11
[20534]	CONVERGENT MARGIN	HONSHU ARC / NORTHEASTERN HONSHU ARC / HOKKAIDO / YOTEI		42.8	42.8	140.6	140.6	SAE			s_001-5-1-LIGR4 [20534]	NOT GIVEN [20534]									VOL					GL [20534]	70.82	0.54		15.15				3.85	3.18	0.88	0.16		1.8	5.07	0.11
[20534]	CONVERGENT MARGIN	HONSHU ARC / NORTHEASTERN HONSHU ARC / HOKKAIDO / YOTEI		42.8	42.8	140.6	140.6	SAE			s_001-5-1-LIGR7 [20534]	NOT GIVEN [20534]									VOL					GL [20534]	69.24	0.42		15.57				3.44	3.47	0.76	0.17		1.58	5.15	0.13
[20534]	CONVERGENT MARGIN	HONSHU ARC / NORTHEASTERN HONSHU ARC / HOKKAIDO / YOTEI		42.8	42.8	140.6	140.6	SAE			s_001-5-1-LIGR11 [20534]	NOT GIVEN [20534]									VOL					GL [20534]	69.88	0.45		15.75				3.51	3.24	0.75	0.17		1.7	5.08	0.13
[20534]	CONVERGENT MARGIN	HONSHU ARC / NORTHEASTERN HONSHU ARC / HOKKAIDO / YOTEI		42.8	42.8	140.6	140.6	SAE			s_001-5-1-LIGR12 [20534]	NOT GIVEN [20534]									VOL					GL [20534]	66.75	0.46		14.4				3.52	2.91	0.79	0.12		1.71	4.53	0.13
[20534]	CONVERGENT MARGIN	HONSHU ARC / NORTHEASTERN HONSHU ARC / HOKKAIDO / YOTEI		42.8	42.8	140.6	140.6	SAE			s_001-5-1-LIGR13 [20534]	NOT GIVEN [20534]									VOL					GL [20534]	66.27	0.42		14.44				3.74	2.86	0.8	0.15		1.73	4.59	0.13
[20534]	CONVERGENT MARGIN	HONSHU ARC / NORTHEASTERN HONSHU ARC / HOKKAIDO / YOTEI		42.8	42.8	140.6	140.6	SAE			s_001-5-1-LIGR14 [20534]	NOT GIVEN [20534]									VOL					GL [20534]	69.35	0.48		14.85				3.8	3.09	0.93	0.19		1.81	4.85	0.13
[20534]	CONVERGENT MARGIN	HONSHU ARC / NORTHEASTERN HONSHU ARC / HOKKAIDO / YOTEI		42.8	42.8	140.6	140.6	SAE			s_001-5-4-SCO7 [20534]	NOT GIVEN [20534]									VOL					GL [20534]	63.52	0.84		16.69				5.37	5.21	2.3	0.28		1.2	4.91	0.37
[20534]	CONVERGENT MARGIN	HONSHU ARC / NORTHEASTERN HONSHU ARC / HOKKAIDO / YOTEI		42.8	42.8	140.6	140.6	SAE			s_001-5-4-SCO12 [20534]	NOT GIVEN [20534]									VOL					GL [20534]	63.15	0.78		16.94				5.82	5.89	2.57	0.28		1.09	4.7	0.4
[20534]	CONVERGENT MARGIN	HONSHU ARC / NORTHEASTERN HONSHU ARC / HOKKAIDO / YOTEI		42.8	42.8	140.6	140.6	SAE			s_001-5-4-SCO14 [20534]	NOT GIVEN [20534]									VOL					GL [20534]	62.86	1.09		15.96				6.13	5.08	2.17	0.21		1.23	4.84	0.41
[20534]	CONVERGENT MARGIN	HONSHU ARC / NORTHEASTERN HONSHU ARC / HOKKAIDO / YOTEI		42.8	42.8	140.6	140.6	SAE			s_001-5-3-WH1 [20534]	NOT GIVEN [20534]									VOL					GL [20534]	66.69	0.58		15.65				4.1	3.56	1.01	0.21		1.62	4.1	0.18
[20534]	CONVERGENT MARGIN	HONSHU ARC / NORTHEASTERN HONSHU ARC / HOKKAIDO / YOTEI		42.8	42.8	140.6	140.6	SAE			s_001-5-3-WH2 [20534]	NOT GIVEN [20534]									VOL					GL [20534]	68.46	0.53		14.96				3.78	3.36	0.98	0.2		1.6	4.54	0.17
[20534]	CONVERGENT MARGIN	HONSHU ARC / NORTHEASTERN HONSHU ARC / HOKKAIDO / YOTEI		42.8	42.8	140.6	140.6	SAE			s_001-5-3-WH4 [20534]	NOT GIVEN [20534]									VOL					GL [20534]	66.38	0.61		15				3.94	3.62	1.02	0.17		1.61	4.44	0.2
[20534]	CONVERGENT MARGIN	HONSHU ARC / NORTHEASTERN HONSHU ARC / HOKKAIDO / YOTEI		42.8	42.8	140.6	140.6	SAE			s_001-5-3-WH12 [20534]	NOT GIVEN [20534]									VOL					GL [20534]	67.05	0.62		15.48				4.53	4.02	1.25	0.19		1.63	4.55	0.2
[20534]	CONVERGENT MARGIN	HONSHU ARC / NORTHEASTERN HONSHU ARC / HOKKAIDO / YOTEI		42.8	42.8	140.6	140.6	SAE			s_001-5-3-LIGR2 [20534]	NOT GIVEN [20534]									VOL					GL [20534]	69.84	0.57		15.82				4.06	3.68	1.16	0.18		1.62	5.3	0.21
[20534]	CONVERGENT MARGIN	HONSHU ARC / NORTHEASTERN HONSHU ARC / HOKKAIDO / YOTEI		42.8	42.8	140.6	140.6	SAE			s_001-5-3-LIGR8 [20534]	NOT GIVEN [20534]									VOL					GL [20534]	69.5	0.51		15.6				4.14	3.69	1.1	0.25		1.67	4.64	0.2
[20534]	CONVERGENT MARGIN	HONSHU ARC / NORTHEASTERN HONSHU ARC / HOKKAIDO / YOTEI		42.8	42.8	140.6	140.6	SAE			s_001-5-3-LIGR9 [20534]	NOT GIVEN [20534]									VOL					GL [20534]	67.92	0.61		15.59				4.22	4.05	1.17	0.17		1.45	4.6	0.19
[20534]	CONVERGENT MARGIN	HONSHU ARC / NORTHEASTERN HONSHU ARC / HOKKAIDO / YOTEI		42.8	42.8	140.6	140.6	SAE			s_001-5-3-LIGR12 [20534]	NOT GIVEN [20534]									VOL					GL [20534]	67.27	0.61		15.18				4.09	3.96	1.21	0.2		1.53	4.64	0.19
[20534]	CONVERGENT MARGIN	HONSHU ARC / NORTHEASTERN HONSHU ARC / HOKKAIDO / YOTEI		42.8	42.8	140.6	140.6	SAE			s_001-5-3-LIGR14 [20534]	NOT GIVEN [20534]									VOL					GL [20534]	68.77	0.53		15.27				3.57	3.53	1.1	0.21		1.62	4.67	0.19
[20534]	CONVERGENT MARGIN	HONSHU ARC / NORTHEASTERN HONSHU ARC / HOKKAIDO / YOTEI		42.8	42.8	140.6	140.6	SAE			s_001-5-3-LIGR16 [20534]	NOT GIVEN [20534]									VOL					GL [20534]	67.37	0.62		15.24				3.45	3.76	1.26	0.2		1.56	4.44	0.17
[20534]	CONVERGENT MARGIN	HONSHU ARC / NORTHEASTERN HONSHU ARC / HOKKAIDO / YOTEI		42.8	42.8	140.6	140.6	SAE			s_001-5-3-LIGR17 [20534]	NOT GIVEN [20534]									VOL					GL [20534]	66.54	0.55		14.94				3.44	3.87	1.25	0.25		1.6	4.5	0.17
[20534]	CONVERGENT MARGIN	HONSHU ARC / NORTHEASTERN HONSHU ARC / HOKKAIDO / YOTEI		42.8	42.8	140.6	140.6	SAE			s_001-5-3-GR3 [20534]	NOT GIVEN [20534]									VOL					GL [20534]	68.49	0.63		15.64				4.13	3.52	0.77	0.15		1.65	5.14	0.16
[20534]	CONVERGENT MARGIN	HONSHU ARC / NORTHEASTERN HONSHU ARC / HOKKAIDO / YOTEI		42.8	42.8	140.6	140.6	SAE			s_001-5-3-GR6 [20534]	NOT GIVEN [20534]									VOL					GL [20534]	68.07	0.58		14.84				3.82	3.22	0.97	0.18		1.68	5.18	0.15
[20534]	CONVERGENT MARGIN	HONSHU ARC / NORTHEASTERN HONSHU ARC / HOKKAIDO / YOTEI		42.8	42.8	140.6	140.6	SAE			s_001-5-3-GR7 [20534]	NOT GIVEN [20534]									VOL					GL [20534]	68.7	0.66		14.98				4.56	3.16	1.02	0.17		1.82	5.22	0.18
[20534]	CONVERGENT MARGIN	HONSHU ARC / NORTHEASTERN HONSHU ARC / HOKKAIDO / YOTEI		42.8	42.8	140.6	140.6	SAE			s_001-5-3-GR9 [20534]	NOT GIVEN [20534]									VOL					GL [20534]	65.82	0.52		15.07				3.41	3.22	0.41	0.13		1.51	5.21	0.17
[20534]	CONVERGENT MARGIN	HONSHU ARC / NORTHEASTERN HONSHU ARC / HOKKAIDO / YOTEI		42.8	42.8	140.6	140.6	SAE			s_001-5-3-GR10 [20534]	NOT GIVEN [20534]									VOL					GL [20534]	69.34	0.5		15.16				3.85	3.25	0.86	0.18		1.69	5.17	0.16
[20534]	CONVERGENT MARGIN	HONSHU ARC / NORTHEASTERN HONSHU ARC / HOKKAIDO / YOTEI		42.8	42.8	140.6	140.6	SAE			s_001-5-3-GR12 [20534]	NOT GIVEN [20534]									VOL					GL [20534]	68.44	0.6		15.38				3.76	3.48	0.91	0.17		1.65	5.07	0.16
[20534]	CONVERGENT MARGIN	HONSHU ARC / NORTHEASTERN HONSHU ARC / HOKKAIDO / YOTEI		42.8	42.8	140.6	140.6	SAE			s_001-5-3-GR14 [20534]	NOT GIVEN [20534]									VOL					GL [20534]	68.32	0.53		15.83				3.92	3.67	1.02	0.2		1.55	5.34	0.15
[20534]	CONVERGENT MARGIN	HONSHU ARC / NORTHEASTERN HONSHU ARC / HOKKAIDO / YOTEI		42.8	42.8	140.6	140.6	SAE			s_001-5-3-GR15 [20534]	NOT GIVEN [20534]									VOL					GL [20534]	68.28	0.63		14.63				4.63	3.09	1.17	0.23		1.86	4.95	0.18
[20534]	CONVERGENT MARGIN	HONSHU ARC / NORTHEASTERN HONSHU ARC / HOKKAIDO / YOTEI		42.8	42.8	140.6	140.6	SAE			s_001-5-3-GR16 [20534]	NOT GIVEN [20534]									VOL					GL [20534]	67.97	0.57		14.69				4.14	3.73	1.26	0.23		1.55	4.7	0.16
[20534]	CONVERGENT MARGIN	HONSHU ARC / NORTHEASTERN HONSHU ARC / HOKKAIDO / YOTEI		42.8	42.8	140.6	140.6	SAE			s_001-5-3-WH3 [20534]	NOT GIVEN [20534]									VOL					GL [20534]	67.16	0.53		15.17				4.2	3.57	1.01	0.2		1.69	4.65	0.18
[20534]	CONVERGENT MARGIN	HONSHU ARC / NORTHEASTERN HONSHU ARC / HOKKAIDO / YOTEI		42.8	42.8	140.6	140.6	SAE			s_001-5-3-WH6 [20534]	NOT GIVEN [20534]									VOL					GL [20534]	66.03	0.48		15.02				4.12	3.67	1.05	0.24		1.69	4.61	0.17
[20534]	CONVERGENT MARGIN	HONSHU ARC / NORTHEASTERN HONSHU ARC / HOKKAIDO / YOTEI		42.8	42.8	140.6	140.6	SAE			s_001-5-3-WH7 [20534]	NOT GIVEN [20534]									VOL					GL [20534]	66.48	0.6		15.22				4.03	3.68	1.13	0.18		1.66	4.49	0.19
[20534]	CONVERGENT MARGIN	HONSHU ARC / NORTHEASTERN HONSHU ARC / HOKKAIDO / YOTEI		42.8	42.8	140.6	140.6	SAE			s_001-4-1-WH1 [20534]	NOT GIVEN [20534]									VOL					GL [20534]	67.48	0.69		15.44				4.76	3.9	1.15	0.19		1.64	4.93	0.23
[20534]	CONVERGENT MARGIN	HONSHU ARC / NORTHEASTERN HONSHU ARC / HOKKAIDO / YOTEI		42.8	42.8	140.6	140.6	SAE			s_001-4-1-WH3 [20534]	NOT GIVEN [20534]									VOL					GL [20534]	67.37	0.66		15.61				4.78	4.17	1.14	0.17		1.56	4.89	0.21
[20534]	CONVERGENT MARGIN	HONSHU ARC / NORTHEASTERN HONSHU ARC / HOKKAIDO / YOTEI		42.8	42.8	140.6	140.6	SAE			s_001-4-1-WH9 [20534]	NOT GIVEN [20534]									VOL					GL [20534]	66.65	0.68		15.46				4.82	4.14	1.14	0.23		1.56	5.06	0.24
[20534]	CONVERGENT MARGIN	HONSHU ARC / NORTHEASTERN HONSHU ARC / HOKKAIDO / YOTEI		42.8	42.8	140.6	140.6	SAE			s_001-4-1-WH10 [20534]	NOT GIVEN [20534]									VOL					GL [20534]	64.12	0.72		14.6				4.88	3.7	1.1	0.22		1.55	4.48	0.23
[20534]	CONVERGENT MARGIN	HONSHU ARC / NORTHEASTERN HONSHU ARC / HOKKAIDO / YOTEI		42.8	42.8	140.6	140.6	SAE			s_001-4-1-WH11 [20534]	NOT GIVEN [20534]									VOL					GL [20534]	65.9	0.64		15.3				4.7	3.86	1.18	0.14		1.61	4.98	0.24
[20534]	CONVERGENT MARGIN	HONSHU ARC / NORTHEASTERN HONSHU ARC / HOKKAIDO / YOTEI		42.8	42.8	140.6	140.6	SAE			s_001-4-1-WH12 [20534]	NOT GIVEN [20534]									VOL					GL [20534]	66.8	0.72		15.07				4.66	3.92	1.13	0.19		1.67	5.21	0.24
[20534]	CONVERGENT MARGIN	HONSHU ARC / NORTHEASTERN HONSHU ARC / HOKKAIDO / YOTEI		42.8	42.8	140.6	140.6	SAE			s_001-4-1-WH13 [20534]	NOT GIVEN [20534]									VOL					GL [20534]	68.38	0.72		15.59				5.07	3.87	1.14	0.16		1.76	5.03	0.22
[20534]	CONVERGENT MARGIN	HONSHU ARC / NORTHEASTERN HONSHU ARC / HOKKAIDO / YOTEI		42.8	42.8	140.6	140.6	SAE			s_001-4-1-WH14 [20534]	NOT GIVEN [20534]									VOL					GL [20534]	65.21	0.69		14.66				4.91	3.56	1.09	0.17		1.7	4.62	0.23
[20534]	CONVERGENT MARGIN	HONSHU ARC / NORTHEASTERN HONSHU ARC / HOKKAIDO / YOTEI		42.8	42.8	140.6	140.6	SAE			s_001-4-1-GR1 [20534]	NOT GIVEN [20534]									VOL					GL [20534]	66.08	0.65		15.44				5.43	3.99	1.86	0.27		1.46	5.07	0.19
[20534]	CONVERGENT MARGIN	HONSHU ARC / NORTHEASTERN HONSHU ARC / HOKKAIDO / YOTEI		42.8	42.8	140.6	140.6	SAE			s_001-4-1-GR7 [20534]	NOT GIVEN [20534]									VOL					GL [20534]	67.62	0.65		16.3				4.61	4.16	1.16	0.16		1.54	5.34	0.2
[20534]	CONVERGENT MARGIN	HONSHU ARC / NORTHEASTERN HONSHU ARC / HOKKAIDO / YOTEI		42.8	42.8	140.6	140.6	SAE			s_001-4-1-GR9 [20534]	NOT GIVEN [20534]									VOL					GL [20534]	68.2	0.71		15.59				4.28	3.57	0.63	0.16		1.79	5.47	0.21
[20534]	CONVERGENT MARGIN	HONSHU ARC / NORTHEASTERN HONSHU ARC / HOKKAIDO / YOTEI		42.8	42.8	140.6	140.6	SAE			s_001-4-3-GR2 [20534]	NOT GIVEN [20534]									VOL					GL [20534]	65.87	0.86		15.5				5.34	4.31	1.33	0.22		1.66	4.83	0.32
[20534]	CONVERGENT MARGIN	HONSHU ARC / NORTHEASTERN HONSHU ARC / HOKKAIDO / YOTEI		42.8	42.8	140.6	140.6	SAE			s_001-4-3-GR3 [20534]	NOT GIVEN [20534]									VOL					GL [20534]	66.54	0.89		16.12				4.81	4.35	0.89	0.2		1.52	5.2	0.36
[20534]	CONVERGENT MARGIN	HONSHU ARC / NORTHEASTERN HONSHU ARC / HOKKAIDO / YOTEI		42.8	42.8	140.6	140.6	SAE			s_001-4-3-GR4 [20534]	NOT GIVEN [20534]									VOL					GL [20534]	66.52	1		14.91				6.28	4.41	1.83	0.21		1.56	4.96	0.38
[20534]	CONVERGENT MARGIN	HONSHU ARC / NORTHEASTERN HONSHU ARC / HOKKAIDO / YOTEI		42.8	42.8	140.6	140.6	SAE			s_001-4-3-GR8 [20534]	NOT GIVEN [20534]									VOL					GL [20534]	65.71	0.83		15.73				6.04	4.66	1.98	0.2		1.48	4.96	0.29
[20534]	CONVERGENT MARGIN	HONSHU ARC / NORTHEASTERN HONSHU ARC / HOKKAIDO / YOTEI		42.8	42.8	140.6	140.6	SAE			s_001-4-3-GR10 [20534]	NOT GIVEN [20534]									VOL					GL [20534]	67.21	0.88		16.04				4.98	4.4	0.68	0.18		1.64	5.32	0.32
[20534]	CONVERGENT MARGIN	HONSHU ARC / NORTHEASTERN HONSHU ARC / HOKKAIDO / YOTEI		42.8	42.8	140.6	140.6	SAE			s_001-4-3-GR11 [20534]	NOT GIVEN [20534]									VOL					GL [20534]	66.66	0.95		14.5				5.88	4.16	1.46	0.26		1.7	4.81	0.36
[20534]	CONVERGENT MARGIN	HONSHU ARC / NORTHEASTERN HONSHU ARC / HOKKAIDO / YOTEI		42.8	42.8	140.6	140.6	SAE			s_001-4-3-GR12 [20534]	NOT GIVEN [20534]									VOL					GL [20534]	66.18	0.87		15.15				5.73	4.36	1.36	0.18		1.64	4.82	0.35
[20534]	CONVERGENT MARGIN	HONSHU ARC / NORTHEASTERN HONSHU ARC / HOKKAIDO / YOTEI		42.8	42.8	140.6	140.6	SAE			s_001-4-3-GR14 [20534]	NOT GIVEN [20534]									VOL					GL [20534]	66.58	0.93		14.6				5.99	3.97	1.35	0.28		1.73	4.7	0.38
[20534]	CONVERGENT MARGIN	HONSHU ARC / NORTHEASTERN HONSHU ARC / HOKKAIDO / YOTEI		42.8	42.8	140.6	140.6	SAE			s_001-4-3-GR15 [20534]	NOT GIVEN [20534]									VOL					GL [20534]	67.32	0.93		15.65				5.43	4.22	0.96	0.19		1.62	5.24	0.31
[20534]	CONVERGENT MARGIN	HONSHU ARC / NORTHEASTERN HONSHU ARC / HOKKAIDO / YOTEI		42.8	42.8	140.6	140.6	SAE			s_001-4-2-BR2 [20534]	NOT GIVEN [20534]									VOL					GL [20534]	68.05	0.67		14.71				5.35	3.45	1.23	0.25		1.8	5.04	0.26
[20534]	CONVERGENT MARGIN	HONSHU ARC / NORTHEASTERN HONSHU ARC / HOKKAIDO / YOTEI		42.8	42.8	140.6	140.6	SAE			s_001-4-2-BR3 [20534]	NOT GIVEN [20534]									VOL					GL [20534]	66.83	0.71		14.99				5.52	4.01	1.79	0.31		1.6	4.93	0.2
[20534]	CONVERGENT MARGIN	HONSHU ARC / NORTHEASTERN HONSHU ARC / HOKKAIDO / YOTEI		42.8	42.8	140.6	140.6	SAE			s_001-4-2-BR4 [20534]	NOT GIVEN [20534]									VOL					GL [20534]	67.69	0.68		15.81				4.33	3.87	0.64	0.18		1.74	5.29	0.22
[20534]	CONVERGENT MARGIN	HONSHU ARC / NORTHEASTERN HONSHU ARC / HOKKAIDO / YOTEI		42.8	42.8	140.6	140.6	SAE			s_001-4-2-BR5 [20534]	NOT GIVEN [20534]									VOL					GL [20534]	68.88	0.72		15.89				4.25	3.74	0.66	0.09		1.72	5.32	0.23
[20534]	CONVERGENT MARGIN	HONSHU ARC / NORTHEASTERN HONSHU ARC / HOKKAIDO / YOTEI		42.8	42.8	140.6	140.6	SAE			s_001-4-2-BR8 [20534]	NOT GIVEN [20534]									VOL					GL [20534]	66.76	0.63		16.14				4.83	4.34	1.32	0.21		1.46	5.29	0.19
[20534]	CONVERGENT MARGIN	HONSHU ARC / NORTHEASTERN HONSHU ARC / HOKKAIDO / YOTEI		42.8	42.8	140.6	140.6	SAE			s_001-3-SCO2 [20534]	NOT GIVEN [20534]									VOL					GL [20534]	59.94	1.35		15.09				9.24	6.81	3.38	0.31		1.04	3.56	0.35
[20534]	CONVERGENT MARGIN	HONSHU ARC / NORTHEASTERN HONSHU ARC / HOKKAIDO / YOTEI		42.8	42.8	140.6	140.6	SAE			s_001-3-SCO10 [20534]	NOT GIVEN [20534]									VOL					GL [20534]	60.07	1.39		14.84				9.39	6.19	2.96	0.2		1.27	3.74	0.4
[20534]	CONVERGENT MARGIN	HONSHU ARC / NORTHEASTERN HONSHU ARC / HOKKAIDO / YOTEI		42.8	42.8	140.6	140.6	SAE			s_001-3-SCO13 [20534]	NOT GIVEN [20534]									VOL					GL [20534]	60.4	1.39		14.65				9.5	6.62	3.2	0.21		1.17	3.37	0.42
[20534]	CONVERGENT MARGIN	HONSHU ARC / NORTHEASTERN HONSHU ARC / HOKKAIDO / YOTEI		42.8	42.8	140.6	140.6	SAE			s_001-3-SCO15 [20534]	NOT GIVEN [20534]									VOL					GL [20534]	59.7	1.37		15.14				9.39	6.6	2.69	0.23		1.03	3.25	0.42
[20534]	CONVERGENT MARGIN	HONSHU ARC / NORTHEASTERN HONSHU ARC / HOKKAIDO / YOTEI		42.8	42.8	140.6	140.6	SAE			s_001-3-SCO16 [20534]	NOT GIVEN [20534]									VOL					GL [20534]	60.56	1.4		14.64				9.48	6.79	3.05	0.19		1.34	3.81	0.42
[20534]	CONVERGENT MARGIN	HONSHU ARC / NORTHEASTERN HONSHU ARC / HOKKAIDO / YOTEI		42.8	42.8	140.6	140.6	SAE			s_001-3-SCO17 [20534]	NOT GIVEN [20534]									VOL					GL [20534]	60.09	1.4		14.73				9.58	6.42	3.15	0.25		1.17	3.29	0.42
[20534]	CONVERGENT MARGIN	HONSHU ARC / NORTHEASTERN HONSHU ARC / HOKKAIDO / YOTEI		42.8	42.8	140.6	140.6	SAE			s_001-2-WH4 [20534]	NOT GIVEN [20534]									VOL					GL [20534]	63.57	0.61		15.81				4.63	4.52	1.86	0.22		1.35	4.44	0.21
[20534]	CONVERGENT MARGIN	HONSHU ARC / NORTHEASTERN HONSHU ARC / HOKKAIDO / YOTEI		42.8	42.8	140.6	140.6	SAE			s_001-2-WH6 [20534]	NOT GIVEN [20534]									VOL					GL [20534]	67.06	0.75		14.62				5.06	3.83	1.6	0.2		1.7	4.52	0.26
[20534]	CONVERGENT MARGIN	HONSHU ARC / NORTHEASTERN HONSHU ARC / HOKKAIDO / YOTEI		42.8	42.8	140.6	140.6	SAE			s_001-2-WH8 [20534]	NOT GIVEN [20534]									VOL					GL [20534]	65.74	0.76		15.23				4.22	3.65	1.12	0.16		1.52	4.6	0.25
[20534]	CONVERGENT MARGIN	HONSHU ARC / NORTHEASTERN HONSHU ARC / HOKKAIDO / YOTEI		42.8	42.8	140.6	140.6	SAE			s_001-2-WH9 [20534]	NOT GIVEN [20534]									VOL					GL [20534]	66.46	0.73		16.21				4.23	4.3	1.21	0.19		1.48	4.8	0.23
[20534]	CONVERGENT MARGIN	HONSHU ARC / NORTHEASTERN HONSHU ARC / HOKKAIDO / YOTEI		42.8	42.8	140.6	140.6	SAE			s_001-2-WH10 [20534]	NOT GIVEN [20534]									VOL					GL [20534]	67.57	0.81		15.43				4.43	3.93	1.24	0.18		1.46	4.7	0.23
[20534]	CONVERGENT MARGIN	HONSHU ARC / NORTHEASTERN HONSHU ARC / HOKKAIDO / YOTEI		42.8	42.8	140.6	140.6	SAE			s_001-2-WH11 [20534]	NOT GIVEN [20534]									VOL					GL [20534]	68.27	0.81		14.6				4.85	3.47	1.31	0.17		1.83	4.57	0.27
[20534]	CONVERGENT MARGIN	HONSHU ARC / NORTHEASTERN HONSHU ARC / HOKKAIDO / YOTEI		42.8	42.8	140.6	140.6	SAE			s_001-2-WH12 [20534]	NOT GIVEN [20534]									VOL					GL [20534]	66.94	0.64		16.55				3.99	4.42	1.13	0.15		1.42	4.98	0.23
[20534]	CONVERGENT MARGIN	HONSHU ARC / NORTHEASTERN HONSHU ARC / HOKKAIDO / YOTEI		42.8	42.8	140.6	140.6	SAE			s_001-2-WH13 [20534]	NOT GIVEN [20534]									VOL					GL [20534]	67.5	0.82		15.09				4.65	3.62	1.23	0.19		1.7	4.55	0.26
[20534]	CONVERGENT MARGIN	HONSHU ARC / NORTHEASTERN HONSHU ARC / HOKKAIDO / YOTEI		42.8	42.8	140.6	140.6	SAE			s_001-2-WH15 [20534]	NOT GIVEN [20534]									VOL					GL [20534]	67.8	0.71		15.5				4.28	4.01	1.15	0.15		1.58	4.83	0.24
[20534]	CONVERGENT MARGIN	HONSHU ARC / NORTHEASTERN HONSHU ARC / HOKKAIDO / YOTEI		42.8	42.8	140.6	140.6	SAE			s_001-2-GR3 [20534]	NOT GIVEN [20534]									VOL					GL [20534]	67.43	0.78		15.18				4.28	3.68	1.04	0.19		1.55	4.91	0.2
[20534]	CONVERGENT MARGIN	HONSHU ARC / NORTHEASTERN HONSHU ARC / HOKKAIDO / YOTEI		42.8	42.8	140.6	140.6	SAE			s_001-2-GR6 [20534]	NOT GIVEN [20534]									VOL					GL [20534]	68.3	0.75		14.51				4.33	3.3	1.11	0.16		1.79	4.65	0.16
[20534]	CONVERGENT MARGIN	HONSHU ARC / NORTHEASTERN HONSHU ARC / HOKKAIDO / YOTEI		42.8	42.8	140.6	140.6	SAE			s_001-2-GR8 [20534]	NOT GIVEN [20534]									VOL					GL [20534]	68.38	0.58		15.35				3.11	3.51	0.8	0.16		1.74	4.94	0.24
[20534]	CONVERGENT MARGIN	HONSHU ARC / NORTHEASTERN HONSHU ARC / HOKKAIDO / YOTEI		42.8	42.8	140.6	140.6	SAE			s_001-2-GR9 [20534]	NOT GIVEN [20534]									VOL					GL [20534]	66.5	0.76		15.56				4.34	3.99	1.43	0.16		1.56	4.86	0.2
[20534]	CONVERGENT MARGIN	HONSHU ARC / NORTHEASTERN HONSHU ARC / HOKKAIDO / YOTEI		42.8	42.8	140.6	140.6	SAE			s_001-2-GR10 [20534]	NOT GIVEN [20534]									VOL					GL [20534]	67.38	0.72		15				4.55	3.59	1.3	0.17		1.55	4.82	0.24
[20534]	CONVERGENT MARGIN	HONSHU ARC / NORTHEASTERN HONSHU ARC / HOKKAIDO / YOTEI		42.8	42.8	140.6	140.6	SAE			s_001-2-GR13 [20534]	NOT GIVEN [20534]									VOL					GL [20534]	66.79	0.58		15.8				3.71	3.96	1.08	0.15		1.5	5	0.21
[20534]	CONVERGENT MARGIN	HONSHU ARC / NORTHEASTERN HONSHU ARC / HOKKAIDO / YOTEI		42.8	42.8	140.6	140.6	SAE			s_001-2-GR14 [20534]	NOT GIVEN [20534]									VOL					GL [20534]	67.73	0.75		15.39				4.37	3.75	1.2	0.21		1.62	5.06	0.23
[20534]	CONVERGENT MARGIN	HONSHU ARC / NORTHEASTERN HONSHU ARC / HOKKAIDO / YOTEI		42.8	42.8	140.6	140.6	SAE			s_001-2-GR15 [20534]	NOT GIVEN [20534]									VOL					GL [20534]	65.8	0.69		15.97				4.14	4.18	0.97	0.18		1.57	5.06	0.19
[20534]	CONVERGENT MARGIN	HONSHU ARC / NORTHEASTERN HONSHU ARC / HOKKAIDO / YOTEI		42.8	42.8	140.6	140.6	SAE			s_001-2-GR18 [20534]	NOT GIVEN [20534]									VOL					GL [20534]	69.24	0.65		15.06				2.89	3.26	0.54	0.09		1.83	4.77	0.24
[20534]	CONVERGENT MARGIN	HONSHU ARC / NORTHEASTERN HONSHU ARC / HOKKAIDO / YOTEI		42.8	42.8	140.6	140.6	SAE			s_001-1-WH4 [20534]	NOT GIVEN [20534]									VOL					GL [20534]	68.69	0.64		15.13				3.61	3.66	1.01	0.11		1.76	4.46	0.18
[20534]	CONVERGENT MARGIN	HONSHU ARC / NORTHEASTERN HONSHU ARC / HOKKAIDO / YOTEI		42.8	42.8	140.6	140.6	SAE			s_001-1-WH5 [20534]	NOT GIVEN [20534]									VOL					GL [20534]	69.25	0.71		14.91				4	3.47	1.25	0.22		1.96	4.44	0.19
[20534]	CONVERGENT MARGIN	HONSHU ARC / NORTHEASTERN HONSHU ARC / HOKKAIDO / YOTEI		42.8	42.8	140.6	140.6	SAE			s_001-1-WH6 [20534]	NOT GIVEN [20534]									VOL					GL [20534]	68.58	0.72		14.54				3.97	3.25	1.2	0.19		1.96	4.24	0.2
[20534]	CONVERGENT MARGIN	HONSHU ARC / NORTHEASTERN HONSHU ARC / HOKKAIDO / YOTEI		42.8	42.8	140.6	140.6	SAE			s_001-1-WH8 [20534]	NOT GIVEN [20534]									VOL					GL [20534]	68.02	0.73		15.03				3.63	3.56	1.04	0.16		1.77	4.52	0.18
[20534]	CONVERGENT MARGIN	HONSHU ARC / NORTHEASTERN HONSHU ARC / HOKKAIDO / YOTEI		42.8	42.8	140.6	140.6	SAE			s_001-1-WH11 [20534]	NOT GIVEN [20534]									VOL					GL [20534]	65.97	0.68		14.24				3.61	3.37	1.04	0.16		1.77	4.14	0.17
[20534]	CONVERGENT MARGIN	HONSHU ARC / NORTHEASTERN HONSHU ARC / HOKKAIDO / YOTEI		42.8	42.8	140.6	140.6	SAE			s_001-1-WH12 [20534]	NOT GIVEN [20534]									VOL					GL [20534]	68.25	0.66		14.98				3.74	3.55	1.05	0.12		1.89	4.46	0.19
[20534]	CONVERGENT MARGIN	HONSHU ARC / NORTHEASTERN HONSHU ARC / HOKKAIDO / YOTEI		42.8	42.8	140.6	140.6	SAE			s_001-1-GR6 [20534]	NOT GIVEN [20534]									VOL					GL [20534]	68.52	0.55		16.31				2.14	3.85	0.36	0.06		1.79	5.23	0.14
[20534]	CONVERGENT MARGIN	HONSHU ARC / NORTHEASTERN HONSHU ARC / HOKKAIDO / YOTEI		42.8	42.8	140.6	140.6	SAE			s_001-1-GR10 [20534]	NOT GIVEN [20534]									VOL					GL [20534]	67.89	0.57		15.82				2.83	3.86	0.79	0.09		1.74	4.86	0.13
[20534]	CONVERGENT MARGIN	HONSHU ARC / NORTHEASTERN HONSHU ARC / HOKKAIDO / YOTEI		42.8	42.8	140.6	140.6	SAE			s_001-1-GR11 [20534]	NOT GIVEN [20534]									VOL					GL [20534]	68.56	0.57		15.41				2.57	3.55	0.37	0.11		1.9	4.76	0.16
[20534]	CONVERGENT MARGIN	HONSHU ARC / NORTHEASTERN HONSHU ARC / HOKKAIDO / YOTEI		42.8	42.8	140.6	140.6	SAE			s_001-1-GR13 [20534]	NOT GIVEN [20534]									VOL					GL [20534]	67.21	0.55		14.24				2.79	3.2	0.7	0.15		1.88	4.38	0.18
[20534]	CONVERGENT MARGIN	HONSHU ARC / NORTHEASTERN HONSHU ARC / HOKKAIDO / YOTEI		42.8	42.8	140.6	140.6	SAE			s_013-13-SCOPM3 [20534]	NOT GIVEN [20534]									VOL					GL [20534]	64.42	1.06		14.43				4.87	3.84	0.9	0.13		1.79	4.56	0.31
[20534]	CONVERGENT MARGIN	HONSHU ARC / NORTHEASTERN HONSHU ARC / HOKKAIDO / YOTEI		42.8	42.8	140.6	140.6	SAE			s_013-13-SCOPM4 [20534]	NOT GIVEN [20534]									VOL					GL [20534]	64.19	0.92		15.27				4.61	4.05	0.78	0.2		1.6	4.93	0.3
[20534]	CONVERGENT MARGIN	HONSHU ARC / NORTHEASTERN HONSHU ARC / HOKKAIDO / YOTEI		42.8	42.8	140.6	140.6	SAE			s_013-13-SCOPM5 [20534]	NOT GIVEN [20534]									VOL					GL [20534]	63.89	0.94		15.87				4.67	4.43	1.12	0.16		1.61	4.73	0.26
[20534]	CONVERGENT MARGIN	HONSHU ARC / NORTHEASTERN HONSHU ARC / HOKKAIDO / YOTEI		42.8	42.8	140.6	140.6	SAE			s_013-13-SCOPM6 [20534]	NOT GIVEN [20534]									VOL					GL [20534]	64.77	1.02		14.64				4.8	4.06	1.35	0.2		1.76	4.44	0.26
[20534]	CONVERGENT MARGIN	HONSHU ARC / NORTHEASTERN HONSHU ARC / HOKKAIDO / YOTEI		42.8	42.8	140.6	140.6	SAE			s_013-13-SCOPM8 [20534]	NOT GIVEN [20534]									VOL					GL [20534]	63.87	0.86		15.99				3.76	4.42	0.75	0.14		1.61	4.73	0.24
[20534]	CONVERGENT MARGIN	HONSHU ARC / NORTHEASTERN HONSHU ARC / HOKKAIDO / YOTEI		42.8	42.8	140.6	140.6	SAE			s_013-13-SCOPM10 [20534]	NOT GIVEN [20534]									VOL					GL [20534]	63.67	0.86		16.45				3.83	4.48	0.43	0.1		1.62	4.88	0.27
[20534]	CONVERGENT MARGIN	HONSHU ARC / NORTHEASTERN HONSHU ARC / HOKKAIDO / YOTEI		42.8	42.8	140.6	140.6	SAE			s_013-13-SCOPM14 [20534]	NOT GIVEN [20534]									VOL					GL [20534]	63.48	0.86		16.73				4.3	4.74	0.73	0.13		1.66	4.82	0.27
[20534]	CONVERGENT MARGIN	HONSHU ARC / NORTHEASTERN HONSHU ARC / HOKKAIDO / YOTEI		42.8	42.8	140.6	140.6	SAE			s_013-12-BL1 [20534]	NOT GIVEN [20534]									VOL					GL [20534]	65.34	1.26		15.78				5.29	5.19	0.49	0.09		1.75	4.6	0.59
[20534]	CONVERGENT MARGIN	HONSHU ARC / NORTHEASTERN HONSHU ARC / HOKKAIDO / YOTEI		42.8	42.8	140.6	140.6	SAE			s_013-12-BL6 [20534]	NOT GIVEN [20534]									VOL					GL [20534]	66.04	1.07		16.23				4.58	4.94	0.38	0.15		1.84	4.52	0.47
[20534]	CONVERGENT MARGIN	HONSHU ARC / NORTHEASTERN HONSHU ARC / HOKKAIDO / YOTEI		42.8	42.8	140.6	140.6	SAE			s_013-12-GR2 [20534]	NOT GIVEN [20534]									VOL					GL [20534]	65.84	0.84		16.04				4.65	4.92	1.35	0.15		1.43	4.8	0.37
[20534]	CONVERGENT MARGIN	HONSHU ARC / NORTHEASTERN HONSHU ARC / HOKKAIDO / YOTEI		42.8	42.8	140.6	140.6	SAE			s_013-12-GR3 [20534]	NOT GIVEN [20534]									VOL					GL [20534]	64.66	0.82		16.12				4.75	4.84	1.08	0.17		1.3	4.93	0.35
[20534]	CONVERGENT MARGIN	HONSHU ARC / NORTHEASTERN HONSHU ARC / HOKKAIDO / YOTEI		42.8	42.8	140.6	140.6	SAE			s_013-12-GR4 [20534]	NOT GIVEN [20534]									VOL					GL [20534]	65.1	1		15.84				4.9	4.75	1.16	0.13		1.39	4.82	0.36
[20534]	CONVERGENT MARGIN	HONSHU ARC / NORTHEASTERN HONSHU ARC / HOKKAIDO / YOTEI		42.8	42.8	140.6	140.6	SAE			s_013-12-GR10 [20534]	NOT GIVEN [20534]									VOL					GL [20534]	65.43	0.97		15.13				4.99	4.22	1.21	0.22		1.5	4.61	0.37
[20534]	CONVERGENT MARGIN	HONSHU ARC / NORTHEASTERN HONSHU ARC / HOKKAIDO / YOTEI		42.8	42.8	140.6	140.6	SAE			s_013-12-GR11 [20534]	NOT GIVEN [20534]									VOL					GL [20534]	65.34	0.83		16.05				4.34	4.76	0.99	0.1		1.29	5.22	0.35
[20534]	CONVERGENT MARGIN	HONSHU ARC / NORTHEASTERN HONSHU ARC / HOKKAIDO / YOTEI		42.8	42.8	140.6	140.6	SAE			s_013-12-GR14 [20534]	NOT GIVEN [20534]									VOL					GL [20534]	65.51	0.92		15.48				4.71	4.31	1.18	0.16		1.51	4.65	0.39
[20534]	CONVERGENT MARGIN	HONSHU ARC / NORTHEASTERN HONSHU ARC / HOKKAIDO / YOTEI		42.8	42.8	140.6	140.6	SAE			s_YO-GL-090709-1-5-1-4 [20534]	NOT GIVEN [20534]									VOL					GL [20534]	68.13	0.76		14.17				4.15	3.78	1.09	0.12		2.05	4.22	0.17
[20534]	CONVERGENT MARGIN	HONSHU ARC / NORTHEASTERN HONSHU ARC / HOKKAIDO / YOTEI		42.8	42.8	140.6	140.6	SAE			s_YO-GL-090709-1-5-1-5 [20534]	NOT GIVEN [20534]									VOL					GL [20534]	67.32	0.93		14.5				5.71	4.52	1.85	0.17		1.74	4.4	0.22
[20534]	CONVERGENT MARGIN	HONSHU ARC / NORTHEASTERN HONSHU ARC / HOKKAIDO / YOTEI		42.8	42.8	140.6	140.6	SAE			s_YO-GL-090709-1-5-1-6 [20534]	NOT GIVEN [20534]									VOL					GL [20534]	65.19	0.7		17.72				4.47	6.01	1.26	0.13		1.37	5.1	0.16
[20534]	CONVERGENT MARGIN	HONSHU ARC / NORTHEASTERN HONSHU ARC / HOKKAIDO / YOTEI		42.8	42.8	140.6	140.6	SAE			s_013-9-GR4 [20534]	NOT GIVEN [20534]									VOL					GL [20534]	68.17	0.68		14.32				4.75	3.91	1.09	0.17		1.87	3.73	0.23
[20534]	CONVERGENT MARGIN	HONSHU ARC / NORTHEASTERN HONSHU ARC / HOKKAIDO / YOTEI		42.8	42.8	140.6	140.6	SAE			s_013-9-WH2 [20534]	NOT GIVEN [20534]									VOL					GL [20534]	70.16	0.48		12.78				2.73	2.43	0.66	0.1		2.05	4.05	0.12
[20534]	CONVERGENT MARGIN	HONSHU ARC / NORTHEASTERN HONSHU ARC / HOKKAIDO / YOTEI		42.8	42.8	140.6	140.6	SAE			s_013-9-WH3 [20534]	NOT GIVEN [20534]									VOL					GL [20534]	72.04	0.49		12.96				2.46	2.45	0.61	0.14		2.18	4.18	0.09
[20534]	CONVERGENT MARGIN	HONSHU ARC / NORTHEASTERN HONSHU ARC / HOKKAIDO / YOTEI		42.8	42.8	140.6	140.6	SAE			s_013-9-WH7 [20534]	NOT GIVEN [20534]									VOL					GL [20534]	71.09	0.4		12.93				2.49	2.44	0.62	0.11		2.21	3.94	0.1
[20534]	CONVERGENT MARGIN	HONSHU ARC / NORTHEASTERN HONSHU ARC / HOKKAIDO / YOTEI		42.8	42.8	140.6	140.6	SAE			s_013-9-WH9 [20534]	NOT GIVEN [20534]									VOL					GL [20534]	70.87	0.48		12.76				2.43	2.57	0.64	0.11		2.11	4	0.09
[20534]	CONVERGENT MARGIN	HONSHU ARC / NORTHEASTERN HONSHU ARC / HOKKAIDO / YOTEI		42.8	42.8	140.6	140.6	SAE			s_013-9-WH13 [20534]	NOT GIVEN [20534]									VOL					GL [20534]	71.07	0.5		12.99				2.58	2.5	0.63	0.12		2.12	4.01	0.09
[20534]	CONVERGENT MARGIN	HONSHU ARC / NORTHEASTERN HONSHU ARC / HOKKAIDO / YOTEI		42.8	42.8	140.6	140.6	SAE			s_013-9-WH15 [20534]	NOT GIVEN [20534]									VOL					GL [20534]	71.95	0.43		13.02				2.55	2.52	0.63	0.09		2.2	3.91	0.09
[20534]	CONVERGENT MARGIN	HONSHU ARC / NORTHEASTERN HONSHU ARC / HOKKAIDO / YOTEI		42.8	42.8	140.6	140.6	SAE			s_013-9-WH16 [20534]	NOT GIVEN [20534]									VOL					GL [20534]	71.17	0.51		12.9				2.46	2.5	0.63	0.08		2.14	4.07	0.09
[20534]	CONVERGENT MARGIN	HONSHU ARC / NORTHEASTERN HONSHU ARC / HOKKAIDO / YOTEI		42.8	42.8	140.6	140.6	SAE			s_013-9-WH17 [20534]	NOT GIVEN [20534]									VOL					GL [20534]	70.6	0.48		12.76				2.56	2.46	0.61	0.09		2.14	3.79	0.11
[20534]	CONVERGENT MARGIN	HONSHU ARC / NORTHEASTERN HONSHU ARC / HOKKAIDO / YOTEI		42.8	42.8	140.6	140.6	SAE			s_013-9-WH18 [20534]	NOT GIVEN [20534]									VOL					GL [20534]	69.95	0.47		12.75				2.48	2.43	0.61	0.1		2.14	4.06	0.06
[20534]	CONVERGENT MARGIN	HONSHU ARC / NORTHEASTERN HONSHU ARC / HOKKAIDO / YOTEI		42.8	42.8	140.6	140.6	SAE			s_013-9-WH19 [20534]	NOT GIVEN [20534]									VOL					GL [20534]	72.48	0.45		13.08				2.4	2.59	0.65	0.14		2.18	4.13	0.08
[20534]	CONVERGENT MARGIN	HONSHU ARC / NORTHEASTERN HONSHU ARC / HOKKAIDO / YOTEI		42.8	42.8	140.6	140.6	SAE			s_004-JUST-UNDER-SPFL-1 [20534]	NOT GIVEN [20534]									VOL					GL [20534]	71.92	0.43		12.96				2.64	2.59	0.62	0.07		2.26	4.33	0.08
[20534]	CONVERGENT MARGIN	HONSHU ARC / NORTHEASTERN HONSHU ARC / HOKKAIDO / YOTEI		42.8	42.8	140.6	140.6	SAE			s_004-JUST-UNDER-SPFL-2 [20534]	NOT GIVEN [20534]									VOL					GL [20534]	72.25	0.42		13.35				2.59	2.47	0.68	0.13		2.12	4.36	0.11
[20534]	CONVERGENT MARGIN	HONSHU ARC / NORTHEASTERN HONSHU ARC / HOKKAIDO / YOTEI		42.8	42.8	140.6	140.6	SAE			s_004-JUST-UNDER-SPFL-3 [20534]	NOT GIVEN [20534]									VOL					GL [20534]	72.65	0.5		13.06				2.61	2.58	0.67	0.16		2.21	4.63	0.08
[20534]	CONVERGENT MARGIN	HONSHU ARC / NORTHEASTERN HONSHU ARC / HOKKAIDO / YOTEI		42.8	42.8	140.6	140.6	SAE			s_004-JUST-UNDER-SPFL-4 [20534]	NOT GIVEN [20534]									VOL					GL [20534]	70.37	0.46		12.92				2.62	2.49	0.63	0.1		2.17	4.34	0.08
[20534]	CONVERGENT MARGIN	HONSHU ARC / NORTHEASTERN HONSHU ARC / HOKKAIDO / YOTEI		42.8	42.8	140.6	140.6	SAE			s_004-JUST-UNDER-SPFL-5 [20534]	NOT GIVEN [20534]									VOL					GL [20534]	72.01	0.45		13.25				2.72	2.57	0.6	0.09		2.18	4.4	0.07
[20534]	CONVERGENT MARGIN	HONSHU ARC / NORTHEASTERN HONSHU ARC / HOKKAIDO / YOTEI		42.8	42.8	140.6	140.6	SAE			s_004-JUST-UNDER-SPFL-6 [20534]	NOT GIVEN [20534]									VOL					GL [20534]	72.75	0.48		13.08				2.69	2.59	0.63	0.16		2.26	4.55	0.08
[20534]	CONVERGENT MARGIN	HONSHU ARC / NORTHEASTERN HONSHU ARC / HOKKAIDO / YOTEI		42.8	42.8	140.6	140.6	SAE			s_004-JUST-UNDER-SPFL-7 [20534]	NOT GIVEN [20534]									VOL					GL [20534]	72.78	0.49		13.32				2.64	2.48	0.65	0.15		2.17	4.46	0.11
[20534]	CONVERGENT MARGIN	HONSHU ARC / NORTHEASTERN HONSHU ARC / HOKKAIDO / YOTEI		42.8	42.8	140.6	140.6	SAE			s_004-JUST-UNDER-SPFL-8 [20534]	NOT GIVEN [20534]									VOL					GL [20534]	70.1	0.46		12.75				2.63	2.39	0.65	0.11		2.16	4.01	0.09
[20534]	CONVERGENT MARGIN	HONSHU ARC / NORTHEASTERN HONSHU ARC / HOKKAIDO / YOTEI		42.8	42.8	140.6	140.6	SAE			s_004-JUST-UNDER-SPFL-9 [20534]	NOT GIVEN [20534]									VOL					GL [20534]	69.98	0.43		12.63				2.61	2.47	0.63	0.13		2.07	4.11	0.08
[20534]	CONVERGENT MARGIN	HONSHU ARC / NORTHEASTERN HONSHU ARC / HOKKAIDO / YOTEI		42.8	42.8	140.6	140.6	SAE			s_004-JUST-UNDER-SPFL-10 [20534]	NOT GIVEN [20534]									VOL					GL [20534]	68.97	0.63		13.83				4.25	3.67	1.02	0.15		1.91	4.01	0.16
[20534]	CONVERGENT MARGIN	HONSHU ARC / NORTHEASTERN HONSHU ARC / HOKKAIDO / YOTEI		42.8	42.8	140.6	140.6	SAE			s_004-JUST-UNDER-SPFL-11 [20534]	NOT GIVEN [20534]									VOL					GL [20534]	67.01	0.57		13.63				3.99	3.14	0.81	0.14		1.95	3.96	0.2
[20534]	CONVERGENT MARGIN	HONSHU ARC / NORTHEASTERN HONSHU ARC / HOKKAIDO / YOTEI		42.8	42.8	140.6	140.6	SAE			s_004-JUST-UNDER-SPFL-12 [20534]	NOT GIVEN [20534]									VOL					GL [20534]	68.63	0.63		14.75				4.32	4.08	1.05	0.15		1.79	4.27	0.19
[20534]	CONVERGENT MARGIN	HONSHU ARC / NORTHEASTERN HONSHU ARC / HOKKAIDO / YOTEI		42.8	42.8	140.6	140.6	SAE			s_004-JUST-UNDER-SPFL-13 [20534]	NOT GIVEN [20534]									VOL					GL [20534]	69.07	0.57		15.21				4.14	4.06	0.78	0.14		1.81	4.24	0.17
[20534]	CONVERGENT MARGIN	HONSHU ARC / NORTHEASTERN HONSHU ARC / HOKKAIDO / YOTEI		42.8	42.8	140.6	140.6	SAE			s_004-JUST-UNDER-SPFL-14 [20534]	NOT GIVEN [20534]									VOL					GL [20534]	66.24	0.66		14.26				3.86	3.97	0.88	0.14		1.84	4.03	0.18
[20534]	CONVERGENT MARGIN	HONSHU ARC / NORTHEASTERN HONSHU ARC / HOKKAIDO / YOTEI		42.8	42.8	140.6	140.6	SAE			s_004-5-WH1 [20534]	NOT GIVEN [20534]									VOL					GL [20534]	70.82	0.65		15.52				2.88	3.45	0.89	0.12		1.53	5	0.33
[20534]	CONVERGENT MARGIN	HONSHU ARC / NORTHEASTERN HONSHU ARC / HOKKAIDO / YOTEI		42.8	42.8	140.6	140.6	SAE			s_004-5-WH9 [20534]	NOT GIVEN [20534]									VOL					GL [20534]	68.41	0.57		15.88				2.73	3.76	0.64	0.12		1.41	4.88	0.26
[20534]	CONVERGENT MARGIN	HONSHU ARC / NORTHEASTERN HONSHU ARC / HOKKAIDO / YOTEI		42.8	42.8	140.6	140.6	SAE			s_004-5-WH15 [20534]	NOT GIVEN [20534]									VOL					GL [20534]	67.77	0.61		15.53				2.97	4.15	0.91	0.13		1.5	4.72	0.52
[20534]	CONVERGENT MARGIN	HONSHU ARC / NORTHEASTERN HONSHU ARC / HOKKAIDO / YOTEI		42.8	42.8	140.6	140.6	SAE			s_013-8-WH3 [20534]	NOT GIVEN [20534]									VOL					GL [20534]	67.67	0.66		15.53				3.71	4.16	1.29	0.13		1.26	4.82	0.27
[20534]	CONVERGENT MARGIN	HONSHU ARC / NORTHEASTERN HONSHU ARC / HOKKAIDO / YOTEI		42.8	42.8	140.6	140.6	SAE			s_013-6-3 [20534]	NOT GIVEN [20534]									VOL					GL [20534]	68.09	0.81		14.71				5.04	4.56	1.61	0.11		1.57	3.92	0.37
[20534]	CONVERGENT MARGIN	HONSHU ARC / NORTHEASTERN HONSHU ARC / HOKKAIDO / YOTEI		42.8	42.8	140.6	140.6	SAE			s_013-6-4 [20534]	NOT GIVEN [20534]									VOL					GL [20534]	64.03	0.81		13.65				5.03	4.67	1.51	0.16		1.48	3.45	0.27
[20534]	CONVERGENT MARGIN	HONSHU ARC / NORTHEASTERN HONSHU ARC / HOKKAIDO / YOTEI		42.8	42.8	140.6	140.6	SAE			s_013-6-5 [20534]	NOT GIVEN [20534]									VOL					GL [20534]	66.33	0.78		14.35				4.79	4.48	1.57	0.15		1.42	3.66	0.3
[20534]	CONVERGENT MARGIN	HONSHU ARC / NORTHEASTERN HONSHU ARC / HOKKAIDO / YOTEI		42.8	42.8	140.6	140.6	SAE			s_013-6-6 [20534]	NOT GIVEN [20534]									VOL					GL [20534]	64.84	0.8		13.87				5.28	4.89	1.6	0.18		1.54	3.54	0.3
[20534]	CONVERGENT MARGIN	HONSHU ARC / NORTHEASTERN HONSHU ARC / HOKKAIDO / YOTEI		42.8	42.8	140.6	140.6	SAE			s_013-6-10 [20534]	NOT GIVEN [20534]									VOL					GL [20534]	69.34	0.82		14.95				5.12	4.71	1.64	0.11		1.59	3.99	0.34
[20534]	CONVERGENT MARGIN	HONSHU ARC / NORTHEASTERN HONSHU ARC / HOKKAIDO / YOTEI		42.8	42.8	140.6	140.6	SAE			s_004-2-2 [20534]	NOT GIVEN [20534]									VOL					GL [20534]	66.63	0.87		13.51				5.54	4.68	1.52	0.18		1.79	3.92	0.35
[20534]	CONVERGENT MARGIN	HONSHU ARC / NORTHEASTERN HONSHU ARC / HOKKAIDO / YOTEI		42.8	42.8	140.6	140.6	SAE			s_004-2-5 [20534]	NOT GIVEN [20534]									VOL					GL [20534]	67.93	0.77		15.52				5.1	5	1.43	0.17		1.55	4.39	0.34
[20534]	CONVERGENT MARGIN	HONSHU ARC / NORTHEASTERN HONSHU ARC / HOKKAIDO / YOTEI		42.8	42.8	140.6	140.6	SAE			s_004-2-8 [20534]	NOT GIVEN [20534]									VOL					GL [20534]	67.62	0.8		15.32				5.39	5.42	1.44	0.11		1.55	4.28	0.35
[20534]	CONVERGENT MARGIN	HONSHU ARC / NORTHEASTERN HONSHU ARC / HOKKAIDO / YOTEI		42.8	42.8	140.6	140.6	SAE			s_004-2-12 [20534]	NOT GIVEN [20534]									VOL					GL [20534]	67.33	0.92		13.92				5.11	4.61	1.47	0.17		1.71	3.87	0.37
[20534]	CONVERGENT MARGIN	HONSHU ARC / NORTHEASTERN HONSHU ARC / HOKKAIDO / YOTEI		42.8	42.8	140.6	140.6	SAE			s_004-2-15 [20534]	NOT GIVEN [20534]									VOL					GL [20534]	64.99	0.84		13.59				5.21	4.44	1.41	0.18		1.57	3.52	0.38
[20534]	CONVERGENT MARGIN	HONSHU ARC / NORTHEASTERN HONSHU ARC / HOKKAIDO / YOTEI		42.8	42.8	140.6	140.6	SAE			s_004-1-BR1 [20534]	NOT GIVEN [20534]									VOL					GL [20534]	66.7	0.82		15.13				4.48	4.63	1.44	0.19		1.48	4.4	0.28
[20534]	CONVERGENT MARGIN	HONSHU ARC / NORTHEASTERN HONSHU ARC / HOKKAIDO / YOTEI		42.8	42.8	140.6	140.6	SAE			s_004-1-BR13 [20534]	NOT GIVEN [20534]									VOL					GL [20534]	66.9	0.71		15.7				4.12	4.7	1.02	0.16		1.5	4.38	0.41
[20534]	CONVERGENT MARGIN	HONSHU ARC / NORTHEASTERN HONSHU ARC / HOKKAIDO / YOTEI		42.8	42.8	140.6	140.6	SAE			s_004-1-BR14 [20534]	NOT GIVEN [20534]									VOL					GL [20534]	64.94	0.74		15.04				4.58	4.5	1.4	0.12		1.39	4.09	0.31
[20534]	CONVERGENT MARGIN	HONSHU ARC / NORTHEASTERN HONSHU ARC / HOKKAIDO / YOTEI		42.8	42.8	140.6	140.6	SAE			s_004-1-BR15 [20534]	NOT GIVEN [20534]									VOL					GL [20534]	66	0.7		16.28				4.3	5.3	1.29	0.12		1.38	4.09	0.29
[20534]	CONVERGENT MARGIN	HONSHU ARC / NORTHEASTERN HONSHU ARC / HOKKAIDO / YOTEI		42.8	42.8	140.6	140.6	SAE			s_013-5-WH1 [20534]	NOT GIVEN [20534]									VOL					GL [20534]	68.28	0.45		14.32				2.54	3.31	0.65	0.16		1.53	4.58	0.18
[20534]	CONVERGENT MARGIN	HONSHU ARC / NORTHEASTERN HONSHU ARC / HOKKAIDO / YOTEI		42.8	42.8	140.6	140.6	SAE			s_013-5-WH3 [20534]	NOT GIVEN [20534]									VOL					GL [20534]	68.46	0.42		16.75				2.41	4.55	0.54	0.09		1.34	4.94	0.27
[20534]	CONVERGENT MARGIN	HONSHU ARC / NORTHEASTERN HONSHU ARC / HOKKAIDO / YOTEI		42.8	42.8	140.6	140.6	SAE			s_013-5-WH8 [20534]	NOT GIVEN [20534]									VOL					GL [20534]	67.71	0.38		16.8				2.4	4.56	0.73	0.13		1.29	5.07	0.21
[20534]	CONVERGENT MARGIN	HONSHU ARC / NORTHEASTERN HONSHU ARC / HOKKAIDO / YOTEI		42.8	42.8	140.6	140.6	SAE			s_013-5-WH15 [20534]	NOT GIVEN [20534]									VOL					GL [20534]	66.5	0.35		17.28				2.2	4.71	0.7	0.15		1.17	4.94	0.14
[20534]	CONVERGENT MARGIN	HONSHU ARC / NORTHEASTERN HONSHU ARC / HOKKAIDO / YOTEI		42.8	42.8	140.6	140.6	SAE			s_013-4-BL3 [20534]	NOT GIVEN [20534]									VOL					GL [20534]	63.9	0.58		15.72				4.95	5.6	2.28	0.18		1.29	4.01	0.45
[20534]	CONVERGENT MARGIN	HONSHU ARC / NORTHEASTERN HONSHU ARC / HOKKAIDO / YOTEI		42.8	42.8	140.6	140.6	SAE			s_013-4-BL6 [20534]	NOT GIVEN [20534]									VOL					GL [20534]	62.02	0.69		16.48				4.99	6.86	2.36	0.24		1.11	4.2	0.65
[20534]	CONVERGENT MARGIN	HONSHU ARC / NORTHEASTERN HONSHU ARC / HOKKAIDO / YOTEI		42.8	42.8	140.6	140.6	SAE			s_013-4-BL9 [20534]	NOT GIVEN [20534]									VOL					GL [20534]	63	0.63		16.05				4.51	5.88	1.6	0.18		1.31	4.22	0.65
[20534]	CONVERGENT MARGIN	HONSHU ARC / NORTHEASTERN HONSHU ARC / HOKKAIDO / YOTEI		42.8	42.8	140.6	140.6	SAE			s_013-4-WH1 [20534]	NOT GIVEN [20534]									VOL					GL [20534]	77.02	0.1		11.09				0.97	0.83	0.18	0.05		2.55	3.83	0.03
[20534]	CONVERGENT MARGIN	HONSHU ARC / NORTHEASTERN HONSHU ARC / HOKKAIDO / YOTEI		42.8	42.8	140.6	140.6	SAE			s_013-4-WH2 [20534]	NOT GIVEN [20534]									VOL					GL [20534]	77.93	0.14		11.26				0.99	0.91	0.14	0.05		2.53	3.92	0.05
[20534]	CONVERGENT MARGIN	HONSHU ARC / NORTHEASTERN HONSHU ARC / HOKKAIDO / YOTEI		42.8	42.8	140.6	140.6	SAE			s_013-4-WH3 [20534]	NOT GIVEN [20534]									VOL					GL [20534]	76.5	0.09		10.58				0.87	0.79	0.15	0.1		2.55	3.71	0.04
[20534]	CONVERGENT MARGIN	HONSHU ARC / NORTHEASTERN HONSHU ARC / HOKKAIDO / YOTEI		42.8	42.8	140.6	140.6	SAE			s_013-4-WH9 [20534]	NOT GIVEN [20534]									VOL					GL [20534]	76.74	0.1		11.37				1.11	0.94	0.14	0.06		2.45	4.31	0.05
[20534]	CONVERGENT MARGIN	HONSHU ARC / NORTHEASTERN HONSHU ARC / HOKKAIDO / YOTEI		42.8	42.8	140.6	140.6	SAE			s_013-4-WH19 [20534]	NOT GIVEN [20534]									VOL					GL [20534]	77.08	0.1		10.77				0.98	0.75	0.15	0.09		2.63	3.74	0.04
[20534]	CONVERGENT MARGIN	HONSHU ARC / NORTHEASTERN HONSHU ARC / HOKKAIDO / YOTEI		42.8	42.8	140.6	140.6	SAE			s_013-4-WH20 [20534]	NOT GIVEN [20534]									VOL					GL [20534]	75.45	0.15		11.4				0.94	1	0.13	0.16		2.5	4.1	0.03
[20534]	CONVERGENT MARGIN	HONSHU ARC / NORTHEASTERN HONSHU ARC / HOKKAIDO / YOTEI		42.8	42.8	140.6	140.6	SAE			s_013-4-WH21 [20534]	NOT GIVEN [20534]									VOL					GL [20534]	76	0.12		11.22				1	0.96	0.14	0.08		2.53	4.02	0.04
[20534]	CONVERGENT MARGIN	HONSHU ARC / NORTHEASTERN HONSHU ARC / HOKKAIDO / YOTEI		42.8	42.8	140.6	140.6	SAE			s_013-4-WH22 [20534]	NOT GIVEN [20534]									VOL					GL [20534]	76.22	0.14		11.4				0.92	1.03	0.13	0.07		2.32	4.03	0.05
[20534]	CONVERGENT MARGIN	HONSHU ARC / NORTHEASTERN HONSHU ARC / HOKKAIDO / YOTEI		42.8	42.8	140.6	140.6	SAE			s_013-4-WH23 [20534]	NOT GIVEN [20534]									VOL					GL [20534]	76.78	0.13		10.8				0.97	0.8	0.15	0.02		2.61	3.91	0.03
[20534]	CONVERGENT MARGIN	HONSHU ARC / NORTHEASTERN HONSHU ARC / HOKKAIDO / YOTEI		42.8	42.8	140.6	140.6	SAE			s_036-A-YEL2 [20534]	NOT GIVEN [20534]									VOL					GL [20534]	72.66	0.24		12.93				1.9	1.81	0.39	0.13		1.9	4.84	0.07
[20534]	CONVERGENT MARGIN	HONSHU ARC / NORTHEASTERN HONSHU ARC / HOKKAIDO / YOTEI		42.8	42.8	140.6	140.6	SAE			s_036-A-YEL3 [20534]	NOT GIVEN [20534]									VOL					GL [20534]	73.27	0.29		13.3				2.01	1.87	0.37	0.13		1.98	4.85	0.05
[20534]	CONVERGENT MARGIN	HONSHU ARC / NORTHEASTERN HONSHU ARC / HOKKAIDO / YOTEI		42.8	42.8	140.6	140.6	SAE			s_036-A-YEL5 [20534]	NOT GIVEN [20534]									VOL					GL [20534]	71.27	0.27		12.79				2.01	1.86	0.39	0.11		1.97	4.55	0.07
[20534]	CONVERGENT MARGIN	HONSHU ARC / NORTHEASTERN HONSHU ARC / HOKKAIDO / YOTEI		42.8	42.8	140.6	140.6	SAE			s_036-A-YEL6 [20534]	NOT GIVEN [20534]									VOL					GL [20534]	71.37	0.31		12.75				1.96	1.84	0.34	0.12		1.92	4.54	0.05
[20534]	CONVERGENT MARGIN	HONSHU ARC / NORTHEASTERN HONSHU ARC / HOKKAIDO / YOTEI		42.8	42.8	140.6	140.6	SAE			s_036-A-YEL13 [20534]	NOT GIVEN [20534]									VOL					GL [20534]	70.97	0.24		12.86				1.95	1.87	0.38	0.16		1.92	4.69	0.03
[20534]	CONVERGENT MARGIN	HONSHU ARC / NORTHEASTERN HONSHU ARC / HOKKAIDO / YOTEI		42.8	42.8	140.6	140.6	SAE			s_036-A-YEL14 [20534]	NOT GIVEN [20534]									VOL					GL [20534]	71.48	0.26		12.96				2.03	1.91	0.39	0.11		1.91	4.59	0.09
[20534]	CONVERGENT MARGIN	HONSHU ARC / NORTHEASTERN HONSHU ARC / HOKKAIDO / YOTEI		42.8	42.8	140.6	140.6	SAE			s_036-A-WH1 [20534]	NOT GIVEN [20534]									VOL					GL [20534]	72.13	0.34		13.79				2.34	2.17	0.51	0.14		1.72	4.74	0.06
[20534]	CONVERGENT MARGIN	HONSHU ARC / NORTHEASTERN HONSHU ARC / HOKKAIDO / YOTEI		42.8	42.8	140.6	140.6	SAE			s_036-A-WH2 [20534]	NOT GIVEN [20534]									VOL					GL [20534]	70.57	0.31		13.2				2.15	2.05	0.45	0.11		1.74	4.59	0.09
[20534]	CONVERGENT MARGIN	HONSHU ARC / NORTHEASTERN HONSHU ARC / HOKKAIDO / YOTEI		42.8	42.8	140.6	140.6	SAE			s_036-A-WH3 [20534]	NOT GIVEN [20534]									VOL					GL [20534]	71.31	0.33		13.31				2.25	2.01	0.44	0.13		1.79	4.7	0.04
[20534]	CONVERGENT MARGIN	HONSHU ARC / NORTHEASTERN HONSHU ARC / HOKKAIDO / YOTEI		42.8	42.8	140.6	140.6	SAE			s_036-A-WH4 [20534]	NOT GIVEN [20534]									VOL					GL [20534]	71.92	0.3		13.62				2.25	2.16	0.46	0.09		1.81	4.75	0.06
[20534]	CONVERGENT MARGIN	HONSHU ARC / NORTHEASTERN HONSHU ARC / HOKKAIDO / YOTEI		42.8	42.8	140.6	140.6	SAE			s_036-A-WH5 [20534]	NOT GIVEN [20534]									VOL					GL [20534]	71.03	0.33		13.62				2.14	2.02	0.46	0.1		1.71	4.7	0.07
[20534]	CONVERGENT MARGIN	HONSHU ARC / NORTHEASTERN HONSHU ARC / HOKKAIDO / YOTEI		42.8	42.8	140.6	140.6	SAE			s_036-A-WH6 [20534]	NOT GIVEN [20534]									VOL					GL [20534]	72.13	0.33		13.69				2.24	2.03	0.44	0.16		1.78	4.87	0.04
[20534]	CONVERGENT MARGIN	HONSHU ARC / NORTHEASTERN HONSHU ARC / HOKKAIDO / YOTEI		42.8	42.8	140.6	140.6	SAE			s_036-A-WH7 [20534]	NOT GIVEN [20534]									VOL					GL [20534]	72.93	0.34		13.69				2.28	2.25	0.47	0.13		1.7	4.75	0.08
[20534]	CONVERGENT MARGIN	HONSHU ARC / NORTHEASTERN HONSHU ARC / HOKKAIDO / YOTEI		42.8	42.8	140.6	140.6	SAE			s_036-A-WH8 [20534]	NOT GIVEN [20534]									VOL					GL [20534]	72.46	0.31		13.69				2.17	2.03	0.47	0.12		1.78	4.8	0.06
[20534]	CONVERGENT MARGIN	HONSHU ARC / NORTHEASTERN HONSHU ARC / HOKKAIDO / YOTEI		42.8	42.8	140.6	140.6	SAE			s_036-A-WH9 [20534]	NOT GIVEN [20534]									VOL					GL [20534]	70.89	0.32		13.22				2.16	2.03	0.52	0.1		1.8	4.72	0.05
[20534]	CONVERGENT MARGIN	HONSHU ARC / NORTHEASTERN HONSHU ARC / HOKKAIDO / YOTEI		42.8	42.8	140.6	140.6	SAE			s_070919-1-3-3 [20534]	NOT GIVEN [20534]									VOL					GL [20534]	71.7	0.25		12.65				2.13	1.77	0.38	0.14		1.84	4.64	0.08
[20534]	CONVERGENT MARGIN	HONSHU ARC / NORTHEASTERN HONSHU ARC / HOKKAIDO / YOTEI		42.8	42.8	140.6	140.6	SAE			s_070919-1-3-4 [20534]	NOT GIVEN [20534]									VOL					GL [20534]	71.65	0.24		12.88				1.96	1.86	0.39	0.2		1.87	4.73	0.07
[20534]	CONVERGENT MARGIN	HONSHU ARC / NORTHEASTERN HONSHU ARC / HOKKAIDO / YOTEI		42.8	42.8	140.6	140.6	SAE			s_070919-1-3-5 [20534]	NOT GIVEN [20534]									VOL					GL [20534]	71.76	0.26		12.82				2.09	1.78	0.35	0.12		1.86	4.58	0.08
[20534]	CONVERGENT MARGIN	HONSHU ARC / NORTHEASTERN HONSHU ARC / HOKKAIDO / YOTEI		42.8	42.8	140.6	140.6	SAE			s_070919-1-3-6 [20534]	NOT GIVEN [20534]									VOL					GL [20534]	71.87	0.28		12.95				2.12	1.8	0.36	0.15		1.97	4.73	0.06
[20534]	CONVERGENT MARGIN	HONSHU ARC / NORTHEASTERN HONSHU ARC / HOKKAIDO / YOTEI		42.8	42.8	140.6	140.6	SAE			s_070919-1-3-7 [20534]	NOT GIVEN [20534]									VOL					GL [20534]	72.96	0.23		13.17				2.13	1.88	0.33	0.16		1.99	4.9	0.03
[20534]	CONVERGENT MARGIN	HONSHU ARC / NORTHEASTERN HONSHU ARC / HOKKAIDO / YOTEI		42.8	42.8	140.6	140.6	SAE			s_YO-GL-005-A5GRASHFa-1 [20534]	NOT GIVEN [20534]									VOL					GL [20534]	75.95	0.33		11.52				1.93	1.04	0.68	0.22		2.21	4.4	0.05
[20534]	CONVERGENT MARGIN	HONSHU ARC / NORTHEASTERN HONSHU ARC / HOKKAIDO / YOTEI		42.8	42.8	140.6	140.6	SAE			s_YO-GL-005-A5GRASHFa-2 [20534]	NOT GIVEN [20534]									VOL					GL [20534]	76.62	0.37		10.47				1.44	0.59	0.28	0.18		3.29	3.69	0.05
[20534]	CONVERGENT MARGIN	HONSHU ARC / NORTHEASTERN HONSHU ARC / HOKKAIDO / YOTEI		42.8	42.8	140.6	140.6	SAE			s_YO-GL-005-A5GRASHFa-3 [20534]	NOT GIVEN [20534]									VOL					GL [20534]	78.06	0.38		10.93				1.3	0.68	0.23	0.14		2.69	4.16	0.06
[20534]	CONVERGENT MARGIN	HONSHU ARC / NORTHEASTERN HONSHU ARC / HOKKAIDO / YOTEI		42.8	42.8	140.6	140.6	SAE			s_005-A4-5 [20534]	NOT GIVEN [20534]									VOL					GL [20534]	66.12	0.59		14.48				3.33	3.48	1.06	0.16		1.67	4.52	0.16
[20534]	CONVERGENT MARGIN	HONSHU ARC / NORTHEASTERN HONSHU ARC / HOKKAIDO / YOTEI		42.8	42.8	140.6	140.6	SAE			s_005-A4-7 [20534]	NOT GIVEN [20534]									VOL					GL [20534]	70.04	0.62		13.87				3.38	3.39	0.97	0.16		1.86	4.8	0.18
[20534]	CONVERGENT MARGIN	HONSHU ARC / NORTHEASTERN HONSHU ARC / HOKKAIDO / YOTEI		42.8	42.8	140.6	140.6	SAE			s_005-A4-9 [20534]	NOT GIVEN [20534]									VOL					GL [20534]	68.99	0.66		14.19				3.18	3.3	0.93	0.13		1.69	4.47	0.18
[20534]	CONVERGENT MARGIN	HONSHU ARC / NORTHEASTERN HONSHU ARC / HOKKAIDO / YOTEI		42.8	42.8	140.6	140.6	SAE			s_005-A4-10 [20534]	NOT GIVEN [20534]									VOL					GL [20534]	68.86	0.58		14.32				3.48	3.44	0.95	0.13		1.63	4.25	0.17
[20534]	CONVERGENT MARGIN	HONSHU ARC / NORTHEASTERN HONSHU ARC / HOKKAIDO / YOTEI		42.8	42.8	140.6	140.6	SAE			s_005-A4-SCOGL1 [20534]	NOT GIVEN [20534]									VOL					GL [20534]	72.94	0.3		12.81				1.72	1.88	0.38	0.14		1.91	3.97	0.08
[20534]	CONVERGENT MARGIN	HONSHU ARC / NORTHEASTERN HONSHU ARC / HOKKAIDO / YOTEI		42.8	42.8	140.6	140.6	SAE			s_005-A4-SCOGL2 [20534]	NOT GIVEN [20534]									VOL					GL [20534]	72.25	0.21		12.72				1.68	1.88	0.42	0.12		1.76	4.13	0.06
[20534]	CONVERGENT MARGIN	HONSHU ARC / NORTHEASTERN HONSHU ARC / HOKKAIDO / YOTEI		42.8	42.8	140.6	140.6	SAE			s_005-A4-SCOGL3 [20534]	NOT GIVEN [20534]									VOL					GL [20534]	68.28	0.28		12.44				1.63	1.99	0.39	0.13		1.7	3.62	0.07
[20534]	CONVERGENT MARGIN	HONSHU ARC / NORTHEASTERN HONSHU ARC / HOKKAIDO / YOTEI		42.8	42.8	140.6	140.6	SAE			s_005-A4-SCOGL4 [20534]	NOT GIVEN [20534]									VOL					GL [20534]	73.05	0.28		12.78				1.55	1.92	0.35	0.18		1.94	4.29	0.06
[20534]	CONVERGENT MARGIN	HONSHU ARC / NORTHEASTERN HONSHU ARC / HOKKAIDO / YOTEI		42.8	42.8	140.6	140.6	SAE			s_005-A4-SCOGL6 [20534]	NOT GIVEN [20534]									VOL					GL [20534]	72.18	0.23		12.79				1.55	1.97	0.42	0.14		1.92	4.15	0.04
[20534]	CONVERGENT MARGIN	HONSHU ARC / NORTHEASTERN HONSHU ARC / HOKKAIDO / YOTEI		42.8	42.8	140.6	140.6	SAE			s_005-A4-SCOGL7 [20534]	NOT GIVEN [20534]									VOL					GL [20534]	72.2	0.26		12.77				1.69	1.93	0.4	0.14		1.83	4.32	0.04
[20534]	CONVERGENT MARGIN	HONSHU ARC / NORTHEASTERN HONSHU ARC / HOKKAIDO / YOTEI		42.8	42.8	140.6	140.6	SAE			s_005-A4-SCOGL8 [20534]	NOT GIVEN [20534]									VOL					GL [20534]	72.43	0.26		12.79				1.59	1.87	0.39	0.11		1.91	3.97	0.06
[20534]	CONVERGENT MARGIN	HONSHU ARC / NORTHEASTERN HONSHU ARC / HOKKAIDO / YOTEI		42.8	42.8	140.6	140.6	SAE			s_005-A4-SCOGL9 [20534]	NOT GIVEN [20534]									VOL					GL [20534]	74.08	0.26		13.21				1.67	1.99	0.44	0.12		1.89	4.3	0.05
[20534]	CONVERGENT MARGIN	HONSHU ARC / NORTHEASTERN HONSHU ARC / HOKKAIDO / YOTEI		42.8	42.8	140.6	140.6	SAE			s_005-A4-SCOGL10 [20534]	NOT GIVEN [20534]									VOL					GL [20534]	73.81	0.27		13				1.8	1.97	0.41	0.11		1.94	4.45	0.03
[20534]	CONVERGENT MARGIN	HONSHU ARC / NORTHEASTERN HONSHU ARC / HOKKAIDO / YOTEI		42.8	42.8	140.6	140.6	SAE			s_005-A4-SCOGL11 [20534]	NOT GIVEN [20534]									VOL					GL [20534]	74.06	0.23		13.16				1.59	2.02	0.42	0.13		1.88	4.37	0.05
[20534]	CONVERGENT MARGIN	HONSHU ARC / NORTHEASTERN HONSHU ARC / HOKKAIDO / YOTEI		42.8	42.8	140.6	140.6	SAE			s_005-A4-SCOGL12 [20534]	NOT GIVEN [20534]									VOL					GL [20534]	73.68	0.23		12.85				1.7	1.99	0.36	0.14		1.97	4.22	0.06
[20534]	CONVERGENT MARGIN	HONSHU ARC / NORTHEASTERN HONSHU ARC / HOKKAIDO / YOTEI		42.8	42.8	140.6	140.6	SAE			s_005-A4-SCOGL13 [20534]	NOT GIVEN [20534]									VOL					GL [20534]	73.88	0.26		13.09				1.83	1.98	0.4	0.14		1.9	4.21	0.06
[20534]	CONVERGENT MARGIN	HONSHU ARC / NORTHEASTERN HONSHU ARC / HOKKAIDO / YOTEI		42.8	42.8	140.6	140.6	SAE			s_005-A4-SCOGL14 [20534]	NOT GIVEN [20534]									VOL					GL [20534]	74.02	0.27		13.04				1.78	2.01	0.39	0.11		1.92	4.34	0.06
[20534]	CONVERGENT MARGIN	HONSHU ARC / NORTHEASTERN HONSHU ARC / HOKKAIDO / YOTEI		42.8	42.8	140.6	140.6	SAE			s_005-A4-SCOGL15 [20534]	NOT GIVEN [20534]									VOL					GL [20534]	74.17	0.27		13.06				1.8	2.01	0.39	0.11		1.96	4.14	0.05
[20534]	CONVERGENT MARGIN	HONSHU ARC / NORTHEASTERN HONSHU ARC / HOKKAIDO / YOTEI		42.8	42.8	140.6	140.6	SAE			s_005-A4-SCOGL16 [20534]	NOT GIVEN [20534]									VOL					GL [20534]	73.41	0.27		12.97				1.7	1.99	0.41	0.11		1.92	4.14	0.04
[20534]	CONVERGENT MARGIN	HONSHU ARC / NORTHEASTERN HONSHU ARC / HOKKAIDO / YOTEI		42.8	42.8	140.6	140.6	SAE			s_005-A4-SCOGL17 [20534]	NOT GIVEN [20534]									VOL					GL [20534]	74.87	0.28		13.29				1.57	1.97	0.4	0.13		1.97	4.31	0.05
[20534]	CONVERGENT MARGIN	HONSHU ARC / NORTHEASTERN HONSHU ARC / HOKKAIDO / YOTEI		42.8	42.8	140.6	140.6	SAE			s_005-A3-2 [20534]	NOT GIVEN [20534]									VOL					GL [20534]	73.18	0.27		12.6				1.77	2.03	0.38	0.12		1.77	4.61	0.05
[20534]	CONVERGENT MARGIN	HONSHU ARC / NORTHEASTERN HONSHU ARC / HOKKAIDO / YOTEI		42.8	42.8	140.6	140.6	SAE			s_005-A3-3 [20534]	NOT GIVEN [20534]									VOL					GL [20534]	75.37	0.26		13.09				1.79	1.9	0.41	0.15		1.8	4.83	0.07
[20534]	CONVERGENT MARGIN	HONSHU ARC / NORTHEASTERN HONSHU ARC / HOKKAIDO / YOTEI		42.8	42.8	140.6	140.6	SAE			s_005-A3-4 [20534]	NOT GIVEN [20534]									VOL					GL [20534]	75.16	0.23		13.1				1.86	1.96	0.4	0.16		1.87	4.8	0.05
[20534]	CONVERGENT MARGIN	HONSHU ARC / NORTHEASTERN HONSHU ARC / HOKKAIDO / YOTEI		42.8	42.8	140.6	140.6	SAE			s_005-A3-5 [20534]	NOT GIVEN [20534]									VOL					GL [20534]	73.69	0.31		12.89				1.77	1.97	0.41	0.13		1.77	4.53	0.06
[20534]	CONVERGENT MARGIN	HONSHU ARC / NORTHEASTERN HONSHU ARC / HOKKAIDO / YOTEI		42.8	42.8	140.6	140.6	SAE			s_005-A3-6 [20534]	NOT GIVEN [20534]									VOL					GL [20534]	73.04	0.22		12.77				1.82	1.93	0.38	0.08		1.8	4.68	0.03
[20534]	CONVERGENT MARGIN	HONSHU ARC / NORTHEASTERN HONSHU ARC / HOKKAIDO / YOTEI		42.8	42.8	140.6	140.6	SAE			s_005-A3-7 [20534]	NOT GIVEN [20534]									VOL					GL [20534]	73.56	0.28		12.75				1.72	1.96	0.4	0.11		1.73	4.68	0.07
[20534]	CONVERGENT MARGIN	HONSHU ARC / NORTHEASTERN HONSHU ARC / HOKKAIDO / YOTEI		42.8	42.8	140.6	140.6	SAE			s_005-A3-8 [20534]	NOT GIVEN [20534]									VOL					GL [20534]	72.04	0.23		12.6				1.78	1.93	0.39	0.14		1.82	4.56	0.06
[20534]	CONVERGENT MARGIN	HONSHU ARC / NORTHEASTERN HONSHU ARC / HOKKAIDO / YOTEI		42.8	42.8	140.6	140.6	SAE			s_005-A3-9 [20534]	NOT GIVEN [20534]									VOL					GL [20534]	73.71	0.26		12.77				1.73	1.96	0.41	0.11		1.79	4.69	0.04
[20534]	CONVERGENT MARGIN	HONSHU ARC / NORTHEASTERN HONSHU ARC / HOKKAIDO / YOTEI		42.8	42.8	140.6	140.6	SAE			s_005-A3-10 [20534]	NOT GIVEN [20534]									VOL					GL [20534]	72.94	0.27		12.83				1.72	1.94	0.45	0.12		1.8	4.63	0.08
[20534]	CONVERGENT MARGIN	HONSHU ARC / NORTHEASTERN HONSHU ARC / HOKKAIDO / YOTEI		42.8	42.8	140.6	140.6	SAE			s_005-A3-11 [20534]	NOT GIVEN [20534]									VOL					GL [20534]	72.11	0.22		12.48				1.78	1.88	0.41	0.12		1.83	4.66	0.05
[20534]	CONVERGENT MARGIN	HONSHU ARC / NORTHEASTERN HONSHU ARC / HOKKAIDO / YOTEI		42.8	42.8	140.6	140.6	SAE			s_005-A3-12 [20534]	NOT GIVEN [20534]									VOL					GL [20534]	72.74	0.25		12.67				1.78	1.94	0.38	0.11		1.76	4.6	0.06
[20534]	CONVERGENT MARGIN	HONSHU ARC / NORTHEASTERN HONSHU ARC / HOKKAIDO / YOTEI		42.8	42.8	140.6	140.6	SAE			s_005-A3-13 [20534]	NOT GIVEN [20534]									VOL					GL [20534]	73.8	0.25		12.76				1.86	1.96	0.38	0.17		1.8	4.74	0.06
[20534]	CONVERGENT MARGIN	HONSHU ARC / NORTHEASTERN HONSHU ARC / HOKKAIDO / YOTEI		42.8	42.8	140.6	140.6	SAE			s_005-A3-15 [20534]	NOT GIVEN [20534]									VOL					GL [20534]	73.64	0.29		12.76				1.8	1.97	0.39	0.14		1.86	4.73	0.05
[20534]	CONVERGENT MARGIN	HONSHU ARC / NORTHEASTERN HONSHU ARC / HOKKAIDO / YOTEI		42.8	42.8	140.6	140.6	SAE			s_005-A3-17 [20534]	NOT GIVEN [20534]									VOL					GL [20534]	72.67	0.29		12.66				1.71	2.01	0.39	0.12		1.8	4.52	0.06
[20534]	CONVERGENT MARGIN	HONSHU ARC / NORTHEASTERN HONSHU ARC / HOKKAIDO / YOTEI		42.8	42.8	140.6	140.6	SAE			s_005-A3-18 [20534]	NOT GIVEN [20534]									VOL					GL [20534]	72.98	0.23		12.76				1.81	2.02	0.43	0.1		1.81	4.55	0.06
[20534]	CONVERGENT MARGIN	HONSHU ARC / NORTHEASTERN HONSHU ARC / HOKKAIDO / YOTEI		42.8	42.8	140.6	140.6	SAE			s_005-A3-19 [20534]	NOT GIVEN [20534]									VOL					GL [20534]	73.19	0.21		12.69				1.77	2	0.39	0.12		1.88	4.6	0.05
[20534]	CONVERGENT MARGIN	HONSHU ARC / NORTHEASTERN HONSHU ARC / HOKKAIDO / YOTEI		42.8	42.8	140.6	140.6	SAE			s_005-A3-20 [20534]	NOT GIVEN [20534]									VOL					GL [20534]	72.71	0.26		12.7				1.8	2.03	0.42	0.12		1.79	4.47	0.05
[20534]	CONVERGENT MARGIN	HONSHU ARC / NORTHEASTERN HONSHU ARC / HOKKAIDO / YOTEI		42.8	42.8	140.6	140.6	SAE			s_005-A3-21 [20534]	NOT GIVEN [20534]									VOL					GL [20534]	74.12	0.26		12.86				1.78	2	0.4	0.16		1.81	4.62	0.07
[20534]	CONVERGENT MARGIN	HONSHU ARC / NORTHEASTERN HONSHU ARC / HOKKAIDO / YOTEI		42.8	42.8	140.6	140.6	SAE			s_005-A3-22 [20534]	NOT GIVEN [20534]									VOL					GL [20534]	71.98	0.27		12.58				1.82	1.96	0.39	0.16		1.77	4.63	0.06
[20534]	CONVERGENT MARGIN	HONSHU ARC / NORTHEASTERN HONSHU ARC / HOKKAIDO / YOTEI		42.8	42.8	140.6	140.6	SAE			s_005-A1-1 [20534]	NOT GIVEN [20534]									VOL					GL [20534]	74.95	0.23		12.37				1.4	1.55	0.29	0.12		1.85	4.77	0.05
[20534]	CONVERGENT MARGIN	HONSHU ARC / NORTHEASTERN HONSHU ARC / HOKKAIDO / YOTEI		42.8	42.8	140.6	140.6	SAE			s_005-A1-4 [20534]	NOT GIVEN [20534]									VOL					GL [20534]	73.02	0.14		13.83				1.19	2.07	0.23	0.08		1.67	5.03	0.04
[20534]	CONVERGENT MARGIN	HONSHU ARC / NORTHEASTERN HONSHU ARC / HOKKAIDO / YOTEI		42.8	42.8	140.6	140.6	SAE			s_005-A1-5 [20534]	NOT GIVEN [20534]									VOL					GL [20534]	72.5	0.17		12.86				1.37	1.75	0.23	0.09		1.74	4.62	0.03
[20534]	CONVERGENT MARGIN	HONSHU ARC / NORTHEASTERN HONSHU ARC / HOKKAIDO / YOTEI		42.8	42.8	140.6	140.6	SAE			s_005-A1-9 [20534]	NOT GIVEN [20534]									VOL					GL [20534]	72.54	0.21		13.37				1.27	1.9	0.25	0.08		1.63	4.83	0.05
[20534]	CONVERGENT MARGIN	HONSHU ARC / NORTHEASTERN HONSHU ARC / HOKKAIDO / YOTEI		42.8	42.8	140.6	140.6	SAE			s_005-A1-11 [20534]	NOT GIVEN [20534]									VOL					GL [20534]	73.75	0.18		12.22				1.35	1.52	0.26	0.13		1.83	4.32	0.06
[20534]	CONVERGENT MARGIN	HONSHU ARC / NORTHEASTERN HONSHU ARC / HOKKAIDO / YOTEI		42.8	42.8	140.6	140.6	SAE			s_NO.91-1-1 [20534]	NOT GIVEN [20534]									VOL					GL [20534]	75.41	0.19		11.95				1.39	1.3	0.2	0		2.58	3.63
[20534]	CONVERGENT MARGIN	HONSHU ARC / NORTHEASTERN HONSHU ARC / HOKKAIDO / YOTEI		42.8	42.8	140.6	140.6	SAE			s_NO.91-1-2 [20534]	NOT GIVEN [20534]									VOL					GL [20534]	75.88	0.17		12.15				1.73	1.28	0.21	0.02		2.45	3.83
[20534]	CONVERGENT MARGIN	HONSHU ARC / NORTHEASTERN HONSHU ARC / HOKKAIDO / YOTEI		42.8	42.8	140.6	140.6	SAE			s_NO.91-1-3 [20534]	NOT GIVEN [20534]									VOL					GL [20534]	73.94	0.1		11.85				1.73	1.33	0.16	0.12		2.39	3.69
[20534]	CONVERGENT MARGIN	HONSHU ARC / NORTHEASTERN HONSHU ARC / HOKKAIDO / YOTEI		42.8	42.8	140.6	140.6	SAE			s_NO.90-1-1 [20534]	NOT GIVEN [20534]									VOL					GL [20534]	75.81	0.08		11.97				1.54	1.36	0.16	0.01		2.5	3.56
[20534]	CONVERGENT MARGIN	HONSHU ARC / NORTHEASTERN HONSHU ARC / HOKKAIDO / YOTEI		42.8	42.8	140.6	140.6	SAE			s_NO.90-1-2 [20534]	NOT GIVEN [20534]									VOL					GL [20534]	74.47	0.18		11.89				1.4	1.32	0.15	0.04		2.48	3.55
[20534]	CONVERGENT MARGIN	HONSHU ARC / NORTHEASTERN HONSHU ARC / HOKKAIDO / YOTEI		42.8	42.8	140.6	140.6	SAE			s_NO.90-1-3 [20534]	NOT GIVEN [20534]									VOL					GL [20534]	76.86	0.22		12.21				1.43	1.37	0.2	0.13		2.57	3.64
[20534]	CONVERGENT MARGIN	HONSHU ARC / NORTHEASTERN HONSHU ARC / HOKKAIDO / YOTEI		42.8	42.8	140.6	140.6	SAE			s_NO.90-1-4 [20534]	NOT GIVEN [20534]									VOL					GL [20534]	75.55	0.11		12.15				1.59	1.21	0.13	0.08		2.5	3.76
[20534]	CONVERGENT MARGIN	HONSHU ARC / NORTHEASTERN HONSHU ARC / HOKKAIDO / YOTEI		42.8	42.8	140.6	140.6	SAE			s_NO.90-1-5 [20534]	NOT GIVEN [20534]									VOL					GL [20534]	73.85	0.23		11.77				1.61	1.19	0.17	0.08		2.63	3.69
[20534]	CONVERGENT MARGIN	HONSHU ARC / NORTHEASTERN HONSHU ARC / HOKKAIDO / YOTEI		42.8	42.8	140.6	140.6	SAE			s_NO.92-2 [20534]	NOT GIVEN [20534]									VOL					GL [20534]	74.16	0.16		11.9				1.64	1.38	0.2	0		2.31	3.7
[20534]	CONVERGENT MARGIN	HONSHU ARC / NORTHEASTERN HONSHU ARC / HOKKAIDO / YOTEI		42.8	42.8	140.6	140.6	SAE			s_NO.7-1 [20534]	NOT GIVEN [20534]									VOL					GL [20534]	74.86	0.34		11.91				1.39	1.29	0.14	0.05		2.27	3.55
[20534]	CONVERGENT MARGIN	HONSHU ARC / NORTHEASTERN HONSHU ARC / HOKKAIDO / YOTEI		42.8	42.8	140.6	140.6	SAE			s_NO.7-2 [20534]	NOT GIVEN [20534]									VOL					GL [20534]	74.56	0.2		11.89				1.53	1.36	0.18	0		2.51	3.57
[20534]	CONVERGENT MARGIN	HONSHU ARC / NORTHEASTERN HONSHU ARC / HOKKAIDO / YOTEI		42.8	42.8	140.6	140.6	SAE			s_013-10-1 [20534]	NOT GIVEN [20534]									VOL					GL [20534]	75.99	0.1		12.36				1.49	1.32	0.18	0.12		2.48	3.64
[20534]	CONVERGENT MARGIN	HONSHU ARC / NORTHEASTERN HONSHU ARC / HOKKAIDO / YOTEI		42.8	42.8	140.6	140.6	SAE			s_013-10-2 [20534]	NOT GIVEN [20534]									VOL					GL [20534]	75.33	0.12		12.32				1.63	1.29	0.29	0.01		2.24	3.86
[20534]	CONVERGENT MARGIN	HONSHU ARC / NORTHEASTERN HONSHU ARC / HOKKAIDO / YOTEI		42.8	42.8	140.6	140.6	SAE			s_013-10-3 [20534]	NOT GIVEN [20534]									VOL					GL [20534]	75.03	0.16		12.25				1.66	1.38	0.12	0.03		2.41	3.8
[20534]	CONVERGENT MARGIN	HONSHU ARC / NORTHEASTERN HONSHU ARC / HOKKAIDO / YOTEI		42.8	42.8	140.6	140.6	SAE			s_036-9-1 [20534]	NOT GIVEN [20534]									VOL					GL [20534]	74.73	0.07		12.07				1.58	1.2	0.16	0.15		2.35	3.77
[20534]	CONVERGENT MARGIN	HONSHU ARC / NORTHEASTERN HONSHU ARC / HOKKAIDO / YOTEI		42.8	42.8	140.6	140.6	SAE			s_036-9-2 [20534]	NOT GIVEN [20534]									VOL					GL [20534]	75.42	0.06		11.97				1.41	1.23	0.26	0.08		2.4	3.93
[20534]	CONVERGENT MARGIN	HONSHU ARC / NORTHEASTERN HONSHU ARC / HOKKAIDO / YOTEI		42.8	42.8	140.6	140.6	SAE			s_036-9-3 [20534]	NOT GIVEN [20534]									VOL					GL [20534]	74.62	0.23		12.11				1.29	1.34	0.21	0.12		2.46	3.8
[20534]	CONVERGENT MARGIN	HONSHU ARC / NORTHEASTERN HONSHU ARC / HOKKAIDO / YOTEI		42.8	42.8	140.6	140.6	SAE			s_004-6-1 [20534]	NOT GIVEN [20534]									VOL					GL [20534]	76.28	0.43		12.61				2.18	2.08	0.57	0.11		1.97	3.14
[20534]	CONVERGENT MARGIN	HONSHU ARC / NORTHEASTERN HONSHU ARC / HOKKAIDO / YOTEI		42.8	42.8	140.6	140.6	SAE			s_004-6-2 [20534]	NOT GIVEN [20534]									VOL					GL [20534]	76.21	0.33		12.72				2.19	2.06	0.54	0.13		1.93	3.84
[20534]	CONVERGENT MARGIN	HONSHU ARC / NORTHEASTERN HONSHU ARC / HOKKAIDO / YOTEI		42.8	42.8	140.6	140.6	SAE			s_004-6-3 [20534]	NOT GIVEN [20534]									VOL					GL [20534]	73.29	0.46		12.11				2.24	2.2	0.55	0.09		1.82	3.24
[20534]	CONVERGENT MARGIN	HONSHU ARC / NORTHEASTERN HONSHU ARC / HOKKAIDO / YOTEI		42.8	42.8	140.6	140.6	SAE			s_004-6-4 [20534]	NOT GIVEN [20534]									VOL					GL [20534]	76.34	0.44		12.47				2.36	2.17	0.51	0.13		2.04	3.36
[20534]	CONVERGENT MARGIN	HONSHU ARC / NORTHEASTERN HONSHU ARC / HOKKAIDO / YOTEI		42.8	42.8	140.6	140.6	SAE			s_004-6-5 [20534]	NOT GIVEN [20534]									VOL					GL [20534]	72.73	0.44		12				2.32	2.19	0.49	0.06		1.91	3.45
[20534]	CONVERGENT MARGIN	HONSHU ARC / NORTHEASTERN HONSHU ARC / HOKKAIDO / YOTEI		42.8	42.8	140.6	140.6	SAE			s_004-6-6 [20534]	NOT GIVEN [20534]									VOL					GL [20534]	73.11	0.51		12.21				2.34	2.03	0.57	0.18		1.94	3.39
[20534]	CONVERGENT MARGIN	HONSHU ARC / NORTHEASTERN HONSHU ARC / HOKKAIDO / YOTEI		42.8	42.8	140.6	140.6	SAE			s_004-6-7 [20534]	NOT GIVEN [20534]									VOL					GL [20534]	72.7	0.4		12.01				2.46	2.05	0.42	0.06		1.84	3.38
[20534]	CONVERGENT MARGIN	HONSHU ARC / NORTHEASTERN HONSHU ARC / HOKKAIDO / YOTEI		42.8	42.8	140.6	140.6	SAE			s_004-6-8 [20534]	NOT GIVEN [20534]									VOL					GL [20534]	73.29	0.5		11.9				2.36	2.15	0.49	0.15		1.93	3.1
[20534]	CONVERGENT MARGIN	HONSHU ARC / NORTHEASTERN HONSHU ARC / HOKKAIDO / YOTEI		42.8	42.8	140.6	140.6	SAE			s_004-6-9 [20534]	NOT GIVEN [20534]									VOL					GL [20534]	75.51	0.38		12.64				2.44	2.31	0.51	0.04		1.74	3.38
[20534]	CONVERGENT MARGIN	HONSHU ARC / NORTHEASTERN HONSHU ARC / HOKKAIDO / YOTEI		42.8	42.8	140.6	140.6	SAE			s_004-6-10 [20534]	NOT GIVEN [20534]									VOL					GL [20534]	75.41	0.45		12.33				2.28	2.02	0.63	0.08		1.9	3.67
[20534]	CONVERGENT MARGIN	HONSHU ARC / NORTHEASTERN HONSHU ARC / HOKKAIDO / YOTEI		42.8	42.8	140.6	140.6	SAE			s_036-9-1 [20534]	NOT GIVEN [20534]									VOL					GL [20534]	73.52	0.48		12.23				2.34	1.99	0.5	0.1		2	3.48
[20534]	CONVERGENT MARGIN	HONSHU ARC / NORTHEASTERN HONSHU ARC / HOKKAIDO / YOTEI		42.8	42.8	140.6	140.6	SAE			s_036-9-2 [20534]	NOT GIVEN [20534]									VOL					GL [20534]	73.35	0.45		12.31				2.21	2.16	0.55	0.07		1.87	3.63
[20534]	CONVERGENT MARGIN	HONSHU ARC / NORTHEASTERN HONSHU ARC / HOKKAIDO / YOTEI		42.8	42.8	140.6	140.6	SAE			s_036-9-3 [20534]	NOT GIVEN [20534]									VOL					GL [20534]	73.39	0.43		12.38				2.13	2.12	0.56	0		1.9	3.62
[20534]	CONVERGENT MARGIN	HONSHU ARC / NORTHEASTERN HONSHU ARC / HOKKAIDO / YOTEI		42.8	42.8	140.6	140.6	SAE			s_001-2 [20534]	NOT GIVEN [20534]									VOL					GL [20534]	72.39	0.34		12.68				2.67	2.21	0.6	0.12		2.16	3.5
[20534]	CONVERGENT MARGIN	HONSHU ARC / NORTHEASTERN HONSHU ARC / HOKKAIDO / YOTEI		42.8	42.8	140.6	140.6	SAE			s_001-3 [20534]	NOT GIVEN [20534]									VOL					GL [20534]	73.15	0.38		12.76				2.42	2.23	0.53	0.26		2.07	3.5
[20534]	CONVERGENT MARGIN	HONSHU ARC / NORTHEASTERN HONSHU ARC / HOKKAIDO / YOTEI		42.8	42.8	140.6	140.6	SAE			s_001-5 [20534]	NOT GIVEN [20534]									VOL					GL [20534]	73.43	0.3		12.68				2.36	2.08	0.52	0.08		2.06	3.66
[20534]	CONVERGENT MARGIN	HONSHU ARC / NORTHEASTERN HONSHU ARC / HOKKAIDO / YOTEI		42.8	42.8	140.6	140.6	SAE			s_001-6 [20534]	NOT GIVEN [20534]									VOL					GL [20534]	74.46	0.43		12.84				2.53	2.33	0.58	0		2.08	3.79
[20534]	CONVERGENT MARGIN	HONSHU ARC / NORTHEASTERN HONSHU ARC / HOKKAIDO / YOTEI		42.8	42.8	140.6	140.6	SAE			s_001-7 [20534]	NOT GIVEN [20534]									VOL					GL [20534]	74.24	0.56		12.96				2.57	2.15	0.63	0.06		2.07	3.35
[20534]	CONVERGENT MARGIN	HONSHU ARC / NORTHEASTERN HONSHU ARC / HOKKAIDO / YOTEI		42.8	42.8	140.6	140.6	SAE			s_001-8 [20534]	NOT GIVEN [20534]									VOL					GL [20534]	76.03	0.47		13.05				2.4	2.14	0.56	0.16		2.23	3.64
[20534]	CONVERGENT MARGIN	HONSHU ARC / NORTHEASTERN HONSHU ARC / HOKKAIDO / YOTEI		42.8	42.8	140.6	140.6	SAE			s_001-9 [20534]	NOT GIVEN [20534]									VOL					GL [20534]	72.94	0.38		13.31				2.4	2.36	0.52	0.03		2.08	3.58
[20534]	CONVERGENT MARGIN	HONSHU ARC / NORTHEASTERN HONSHU ARC / HOKKAIDO / YOTEI		42.8	42.8	140.6	140.6	SAE			s_001-10 [20534]	NOT GIVEN [20534]									VOL					GL [20534]	72.71	0.44		12.39				1.97	1.84	0.45	0.12		2.04	3.57
[20534]	CONVERGENT MARGIN	HONSHU ARC / NORTHEASTERN HONSHU ARC / HOKKAIDO / YOTEI		42.8	42.8	140.6	140.6	SAE			s_004-6-1 [20534]	NOT GIVEN [20534]									VOL					GL [20534]	74.78	0.32		12.55				2.29	1.89	0.53	0.12		2.16	3.68
[20534]	CONVERGENT MARGIN	HONSHU ARC / NORTHEASTERN HONSHU ARC / HOKKAIDO / YOTEI		42.8	42.8	140.6	140.6	SAE			s_004-6-2 [20534]	NOT GIVEN [20534]									VOL					GL [20534]	74.14	0.65		12.68				2.53	2.05	0.44	0.03		2.24	3.2
[20534]	CONVERGENT MARGIN	HONSHU ARC / NORTHEASTERN HONSHU ARC / HOKKAIDO / YOTEI		42.8	42.8	140.6	140.6	SAE			s_004-6-3 [20534]	NOT GIVEN [20534]									VOL					GL [20534]	71.3	0.39		11.9				2.25	1.88	0.45	0.01		2.2	3.23
[20534]	CONVERGENT MARGIN	HONSHU ARC / NORTHEASTERN HONSHU ARC / HOKKAIDO / YOTEI		42.8	42.8	140.6	140.6	SAE			s_004-6-4 [20534]	NOT GIVEN [20534]									VOL					GL [20534]	74.2	0.6		12.45				2.45	2.01	0.45	0.1		2.17	3.32
[20534]	CONVERGENT MARGIN	HONSHU ARC / NORTHEASTERN HONSHU ARC / HOKKAIDO / YOTEI		42.8	42.8	140.6	140.6	SAE			s_004-6-6 [20534]	NOT GIVEN [20534]									VOL					GL [20534]	73.33	0.33		12.64				2.27	2.15	0.56	0.16		2.12	3.73
[20534]	CONVERGENT MARGIN	HONSHU ARC / NORTHEASTERN HONSHU ARC / HOKKAIDO / YOTEI		42.8	42.8	140.6	140.6	SAE			s_004-6-7 [20534]	NOT GIVEN [20534]									VOL					GL [20534]	74.41	0.44		12.84				3	2.39	0.47	0.03		2.15	3.11
[20534]	CONVERGENT MARGIN	HONSHU ARC / NORTHEASTERN HONSHU ARC / HOKKAIDO / YOTEI		42.8	42.8	140.6	140.6	SAE			s_004-6-8 [20534]	NOT GIVEN [20534]									VOL					GL [20534]	74.59	0.45		12.81				2.65	2.23	0.54	0.11		2.14	3.28
[20534]	CONVERGENT MARGIN	HONSHU ARC / NORTHEASTERN HONSHU ARC / HOKKAIDO / YOTEI		42.8	42.8	140.6	140.6	SAE			s_004-6-9 [20534]	NOT GIVEN [20534]									VOL					GL [20534]	73.44	0.56		12.35				2.54	1.9	0.54	0.01		2.23	3.45
[20534]	CONVERGENT MARGIN	HONSHU ARC / NORTHEASTERN HONSHU ARC / HOKKAIDO / YOTEI		42.8	42.8	140.6	140.6	SAE			s_004-6-11 [20534]	NOT GIVEN [20534]									VOL					GL [20534]	73.43	0.45		12.61				2.48	2.19	0.55	0.1		2.17	3.16
[20534]	CONVERGENT MARGIN	HONSHU ARC / NORTHEASTERN HONSHU ARC / HOKKAIDO / YOTEI		42.8	42.8	140.6	140.6	SAE			s_013-11-2 [20534]	NOT GIVEN [20534]									VOL					GL [20534]	72.22	0.37		12.29				2.3	2.22	0.53	0.05		2.14	3.75
[20534]	CONVERGENT MARGIN	HONSHU ARC / NORTHEASTERN HONSHU ARC / HOKKAIDO / YOTEI		42.8	42.8	140.6	140.6	SAE			s_013-11-3 [20534]	NOT GIVEN [20534]									VOL					GL [20534]	73.84	0.51		12.77				2.57	2.18	0.56	0.03		2.09	3.72
[20534]	CONVERGENT MARGIN	HONSHU ARC / NORTHEASTERN HONSHU ARC / HOKKAIDO / YOTEI		42.8	42.8	140.6	140.6	SAE			s_013-11-4 [20534]	NOT GIVEN [20534]									VOL					GL [20534]	74.92	0.56		12.96				2.51	2.19	0.48	0.01		2.12	3.47
[20534]	CONVERGENT MARGIN	HONSHU ARC / NORTHEASTERN HONSHU ARC / HOKKAIDO / YOTEI		42.8	42.8	140.6	140.6	SAE			s_080619-1-1 [20534]	NOT GIVEN [20534]									VOL					GL [20534]	73.12	0.37		12.97				2.63	2.37	0.57	0.04		1.4	3.81
[20534]	CONVERGENT MARGIN	HONSHU ARC / NORTHEASTERN HONSHU ARC / HOKKAIDO / YOTEI		42.8	42.8	140.6	140.6	SAE			s_080619-1-2 [20534]	NOT GIVEN [20534]									VOL					GL [20534]	73.38	0.37		12.76				2.43	2.42	0.44	0.11		1.45	3.81
[20534]	CONVERGENT MARGIN	HONSHU ARC / NORTHEASTERN HONSHU ARC / HOKKAIDO / YOTEI		42.8	42.8	140.6	140.6	SAE			s_080619-1-3 [20534]	NOT GIVEN [20534]									VOL					GL [20534]	73.33	0.32		12.75				2.66	2.42	0.61	0.01		1.37	3.82
[20534]	CONVERGENT MARGIN	HONSHU ARC / NORTHEASTERN HONSHU ARC / HOKKAIDO / YOTEI		42.8	42.8	140.6	140.6	SAE			s_080619-1-4 [20534]	NOT GIVEN [20534]									VOL					GL [20534]	76.34	0.31		13.48				2.71	2.54	0.63	0.14		1.43	4.01
[20534]	CONVERGENT MARGIN	HONSHU ARC / NORTHEASTERN HONSHU ARC / HOKKAIDO / YOTEI		42.8	42.8	140.6	140.6	SAE			s_080619-1-5 [20534]	NOT GIVEN [20534]									VOL					GL [20534]	73.52	0.43		13.14				2.71	2.49	0.46	0.05		1.5	3.74
[20534]	CONVERGENT MARGIN	HONSHU ARC / NORTHEASTERN HONSHU ARC / HOKKAIDO / YOTEI		42.8	42.8	140.6	140.6	SAE			s_005 S.NO.6-1-3 [20534]	NOT GIVEN [20534]									VOL					GL [20534]	69.73	0.29		12.29				2.98	2.38	0.54	0.02		1.33	3.6
[20534]	CONVERGENT MARGIN	HONSHU ARC / NORTHEASTERN HONSHU ARC / HOKKAIDO / YOTEI		42.8	42.8	140.6	140.6	SAE			s_005 S.NO.6-1-2 [20534]	NOT GIVEN [20534]									VOL					GL [20534]	72.95	0.4		12.78				2.67	2.39	0.54	0.01		1.42	3.82
[20534]	CONVERGENT MARGIN	HONSHU ARC / NORTHEASTERN HONSHU ARC / HOKKAIDO / YOTEI		42.8	42.8	140.6	140.6	SAE			s_005 S.NO.6-1-1 [20534]	NOT GIVEN [20534]									VOL					GL [20534]	73.23	0.47		12.85				2.87	2.51	0.59	0.03		1.34	3.6
[20534]	CONVERGENT MARGIN	HONSHU ARC / NORTHEASTERN HONSHU ARC / HOKKAIDO / YOTEI		42.8	42.8	140.6	140.6	SAE			s_005 S.NO.6-1-4 [20534]	NOT GIVEN [20534]									VOL					GL [20534]	73.71	0.46		12.94				2.8	2.42	0.59	0.08		1.41	3.79
[20534]	CONVERGENT MARGIN	HONSHU ARC / NORTHEASTERN HONSHU ARC / HOKKAIDO / YOTEI		42.8	42.8	140.6	140.6	SAE			s_005 S.NO.6-1-5 [20534]	NOT GIVEN [20534]									VOL					GL [20534]	72.4	0.37		12.8				2.52	2.39	0.54	0.22		1.44	3.75
[20534]	CONVERGENT MARGIN	HONSHU ARC / NORTHEASTERN HONSHU ARC / HOKKAIDO / YOTEI		42.8	42.8	140.6	140.6	SAE			s_005 S.NO.6-1-6 [20534]	NOT GIVEN [20534]									VOL					GL [20534]	71.53	0.37		12.46				2.63	2.34	0.54	0.05		1.39	3.55
[20534]	CONVERGENT MARGIN	HONSHU ARC / NORTHEASTERN HONSHU ARC / HOKKAIDO / YOTEI		42.8	42.8	140.6	140.6	SAE			s_005 S.NO.6-1-7 [20534]	NOT GIVEN [20534]									VOL					GL [20534]	70.57	0.39		12.18				2.84	2.29	0.51	0.01		1.32	3.43
[20534]	CONVERGENT MARGIN	HONSHU ARC / NORTHEASTERN HONSHU ARC / HOKKAIDO / YOTEI		42.8	42.8	140.6	140.6	SAE			s_005 S.NO.6-1-8 [20534]	NOT GIVEN [20534]									VOL					GL [20534]	74.17	0.36		12.82				2.85	2.5	0.54	0.01		1.32	3.62
[20534]	CONVERGENT MARGIN	HONSHU ARC / NORTHEASTERN HONSHU ARC / HOKKAIDO / YOTEI		42.8	42.8	140.6	140.6	SAE			s_005 S.NO.6-1-9 [20534]	NOT GIVEN [20534]									VOL					GL [20534]	73.05	0.37		12.92				2.75	2.36	0.55	0.09		1.34	3.6
[20534]	CONVERGENT MARGIN	HONSHU ARC / NORTHEASTERN HONSHU ARC / HOKKAIDO / YOTEI		42.8	42.8	140.6	140.6	SAE			s_005 S.NO.6-1-10 [20534]	NOT GIVEN [20534]									VOL					GL [20534]	72.81	0.37		12.65				3.04	2.44	0.54	0.04		1.43	3.49
[20534]	CONVERGENT MARGIN	HONSHU ARC / NORTHEASTERN HONSHU ARC / HOKKAIDO / YOTEI		42.8	42.8	140.6	140.6	SAE			s_005 S.NO.6-2-1 [20534]	NOT GIVEN [20534]									VOL					GL [20534]	73.14	0.37		12.54				2.9	2.61	0.51	0.04		1.31	3.54
[20534]	CONVERGENT MARGIN	HONSHU ARC / NORTHEASTERN HONSHU ARC / HOKKAIDO / YOTEI		42.8	42.8	140.6	140.6	SAE			s_005 S.NO.6-2-2 [20534]	NOT GIVEN [20534]									VOL					GL [20534]	73.55	0.45		12.65				2.79	2.44	0.56	0.03		1.41	3.65
[20534]	CONVERGENT MARGIN	HONSHU ARC / NORTHEASTERN HONSHU ARC / HOKKAIDO / YOTEI		42.8	42.8	140.6	140.6	SAE			s_005 S.NO.6-2-3 [20534]	NOT GIVEN [20534]									VOL					GL [20534]	74.1	0.28		13.01				3.13	2.75	0.64	0.01		1.46	3.64
[20534]	CONVERGENT MARGIN	HONSHU ARC / NORTHEASTERN HONSHU ARC / HOKKAIDO / YOTEI		42.8	42.8	140.6	140.6	SAE			s_YO141 [20534]	NOT GIVEN [20534]									VOL					WR [20534]	58.73	1.03		17.45				6.86	5.48	2.15	0.21		1.23	4.35	0.51
[20534]	CONVERGENT MARGIN	HONSHU ARC / NORTHEASTERN HONSHU ARC / HOKKAIDO / YOTEI		42.8	42.8	140.6	140.6	SAE			s_YO142 [20534]	NOT GIVEN [20534]									VOL					WR [20534]	58.63	1.06		18.06				7.01	5.41	2.12	0.2		1.17	4.27	0.5
[20534]	CONVERGENT MARGIN	HONSHU ARC / NORTHEASTERN HONSHU ARC / HOKKAIDO / YOTEI		42.8	42.8	140.6	140.6	SAE			s_YO397 [20534]	NOT GIVEN [20534]									VOL					WR [20534]	60.02	1		16.95				6.64	5.45	2.13	0.21		1.23	4.5	0.48
[20534]	CONVERGENT MARGIN	HONSHU ARC / NORTHEASTERN HONSHU ARC / HOKKAIDO / YOTEI		42.8	42.8	140.6	140.6	SAE			s_YO398 [20534]	NOT GIVEN [20534]									VOL					WR [20534]	60.4	1		17.21				6.61	5.42	2.11	0.21		1.21	4.47	0.48
[20534]	CONVERGENT MARGIN	HONSHU ARC / NORTHEASTERN HONSHU ARC / HOKKAIDO / YOTEI		42.8	42.8	140.6	140.6	SAE			s_YO404 [20534]	NOT GIVEN [20534]									VOL					WR [20534]	59.31	1.04		17.54				6.86	5.53	2.15	0.2		1.2	4.34	0.51
[20534]	CONVERGENT MARGIN	HONSHU ARC / NORTHEASTERN HONSHU ARC / HOKKAIDO / YOTEI		42.8	42.8	140.6	140.6	SAE			s_YO408 [20534]	NOT GIVEN [20534]									VOL					WR [20534]	57.73	1.07		17.93				7.13	5.4	2.16	0.21		1.14	4.29	0.5
[20534]	CONVERGENT MARGIN	HONSHU ARC / NORTHEASTERN HONSHU ARC / HOKKAIDO / YOTEI		42.8	42.8	140.6	140.6	SAE			s_YO409 [20534]	NOT GIVEN [20534]									VOL					WR [20534]	57.55	1.09		18.44				7.21	5.34	2.19	0.21		1.13	4.17	0.52
[20534]	CONVERGENT MARGIN	HONSHU ARC / NORTHEASTERN HONSHU ARC / HOKKAIDO / YOTEI		42.8	42.8	140.6	140.6	SAE			s_YO410 [20534]	NOT GIVEN [20534]									VOL					WR [20534]	58.95	0.99		16.53				6.69	5.49	2.14	0.21		1.24	4.5	0.49
[20534]	CONVERGENT MARGIN	HONSHU ARC / NORTHEASTERN HONSHU ARC / HOKKAIDO / YOTEI		42.8	42.8	140.6	140.6	SAE			s_YO405 [20534]	NOT GIVEN [20534]									VOL					WR [20534]	57.78	1.09		18.6				7.13	5.46	2.13	0.2		1.13	4.16	0.52
[20534]	CONVERGENT MARGIN	HONSHU ARC / NORTHEASTERN HONSHU ARC / HOKKAIDO / YOTEI		42.8	42.8	140.6	140.6	SAE			s_YO406 [20534]	NOT GIVEN [20534]									VOL					WR [20534]	58.37	1.12		19				7.25	5.44	2.18	0.2		1.09	4.13	0.54
[20534]	CONVERGENT MARGIN	HONSHU ARC / NORTHEASTERN HONSHU ARC / HOKKAIDO / YOTEI		42.8	42.8	140.6	140.6	SAE			s_YO407 [20534]	NOT GIVEN [20534]									VOL					WR [20534]	59.01	1.08		18.48				6.98	5.35	2.14	0.2		1.17	4.22	0.52
[20534]	CONVERGENT MARGIN	HONSHU ARC / NORTHEASTERN HONSHU ARC / HOKKAIDO / YOTEI		42.8	42.8	140.6	140.6	SAE			s_YO411 [20534]	NOT GIVEN [20534]									VOL					WR [20534]	59.5	1.06		18				6.88	5.4	2.14	0.21		1.18	4.31	0.51
[20534]	CONVERGENT MARGIN	HONSHU ARC / NORTHEASTERN HONSHU ARC / HOKKAIDO / YOTEI		42.8	42.8	140.6	140.6	SAE			s_YO150 [20534]	NOT GIVEN [20534]									VOL					WR [20534]	60.66	0.89		17.66				6.1	5.52	2.03	0.23		1.11	4.53	0.39
[20534]	CONVERGENT MARGIN	HONSHU ARC / NORTHEASTERN HONSHU ARC / HOKKAIDO / YOTEI		42.8	42.8	140.6	140.6	SAE			s_YO151 [20534]	NOT GIVEN [20534]									VOL					WR [20534]	59.51	0.93		17.51				6.56	5.78	2.2	0.23		1.07	4.48	0.41
[20534]	CONVERGENT MARGIN	HONSHU ARC / NORTHEASTERN HONSHU ARC / HOKKAIDO / YOTEI		42.8	42.8	140.6	140.6	SAE			s_YO152 [20534]	NOT GIVEN [20534]									VOL					WR [20534]	58.24	0.95		17.6				6.72	5.62	2.19	0.24		1.05	4.44	0.4
[20534]	CONVERGENT MARGIN	HONSHU ARC / NORTHEASTERN HONSHU ARC / HOKKAIDO / YOTEI		42.8	42.8	140.6	140.6	SAE			s_YO153 [20534]	NOT GIVEN [20534]									VOL					WR [20534]	60.88	0.9		17.12				6.29	5.52	2.07	0.22		1.13	4.48	0.37
[20534]	CONVERGENT MARGIN	HONSHU ARC / NORTHEASTERN HONSHU ARC / HOKKAIDO / YOTEI		42.8	42.8	140.6	140.6	SAE			s_YO154 [20534]	NOT GIVEN [20534]									VOL					WR [20534]	61.24	0.89		17.37				5.9	5.38	1.92	0.22		1.18	4.51	0.39
[20534]	CONVERGENT MARGIN	HONSHU ARC / NORTHEASTERN HONSHU ARC / HOKKAIDO / YOTEI		42.8	42.8	140.6	140.6	SAE			s_YO155 [20534]	NOT GIVEN [20534]									VOL					WR [20534]	60.69	0.93		17.43				6.24	5.44	2.12	0.23		1.13	4.48	0.39
[20534]	CONVERGENT MARGIN	HONSHU ARC / NORTHEASTERN HONSHU ARC / HOKKAIDO / YOTEI		42.8	42.8	140.6	140.6	SAE			s_YO156 [20534]	NOT GIVEN [20534]									VOL					WR [20534]	59.82	0.91		16.89				6.44	5.51	2.13	0.23		1.16	4.52	0.38
[20534]	CONVERGENT MARGIN	HONSHU ARC / NORTHEASTERN HONSHU ARC / HOKKAIDO / YOTEI		42.8	42.8	140.6	140.6	SAE			s_YO157 [20534]	NOT GIVEN [20534]									VOL					WR [20534]	58.84	0.9		17.37				6.33	5.57	2.06	0.23		1.09	4.53	0.4
[20534]	CONVERGENT MARGIN	HONSHU ARC / NORTHEASTERN HONSHU ARC / HOKKAIDO / YOTEI		42.8	42.8	140.6	140.6	SAE			s_YO158 [20534]	NOT GIVEN [20534]									VOL					WR [20534]	58.64	0.88		17.44				6.3	5.82	2.06	0.23		1.09	4.53	0.37
[20534]	CONVERGENT MARGIN	HONSHU ARC / NORTHEASTERN HONSHU ARC / HOKKAIDO / YOTEI		42.8	42.8	140.6	140.6	SAE			s_YO159 [20534]	NOT GIVEN [20534]									VOL					WR [20534]	58.94	0.92		18.02				6.44	5.64	2.08	0.23		1.05	4.5	0.41
[20534]	CONVERGENT MARGIN	HONSHU ARC / NORTHEASTERN HONSHU ARC / HOKKAIDO / YOTEI		42.8	42.8	140.6	140.6	SAE			s_YO160 [20534]	NOT GIVEN [20534]									VOL					WR [20534]	59.36	0.94		17.92				6.56	5.55	2.13	0.23		1.06	4.51	0.41
[20534]	CONVERGENT MARGIN	HONSHU ARC / NORTHEASTERN HONSHU ARC / HOKKAIDO / YOTEI		42.8	42.8	140.6	140.6	SAE			s_YO161 [20534]	NOT GIVEN [20534]									VOL					WR [20534]	59.83	0.95		18.13				6.48	5.5	2.13	0.24		1.04	4.47	0.42
[20534]	CONVERGENT MARGIN	HONSHU ARC / NORTHEASTERN HONSHU ARC / HOKKAIDO / YOTEI		42.8	42.8	140.6	140.6	SAE			s_YO162 [20534]	NOT GIVEN [20534]									VOL					WR [20534]	59.97	0.92		18.1				6.3	5.65	2.15	0.22		1.05	4.43	0.39
[20534]	CONVERGENT MARGIN	HONSHU ARC / NORTHEASTERN HONSHU ARC / HOKKAIDO / YOTEI		42.8	42.8	140.6	140.6	SAE			s_YO163 [20534]	NOT GIVEN [20534]									VOL					WR [20534]	60.98	0.88		17.22				6.22	5.61	2.05	0.22		1.15	4.56	0.37
[20534]	CONVERGENT MARGIN	HONSHU ARC / NORTHEASTERN HONSHU ARC / HOKKAIDO / YOTEI		42.8	42.8	140.6	140.6	SAE			s_YO164 [20534]	NOT GIVEN [20534]									VOL					WR [20534]	60.76	0.89		17.31				6.19	5.53	2.07	0.22		1.13	4.55	0.37
[20534]	CONVERGENT MARGIN	HONSHU ARC / NORTHEASTERN HONSHU ARC / HOKKAIDO / YOTEI		42.8	42.8	140.6	140.6	SAE			s_YO165 [20534]	NOT GIVEN [20534]									VOL					WR [20534]	60.97	0.9		17.49				5.95	5.71	2.08	0.21		1.12	4.48	0.36
[20534]	CONVERGENT MARGIN	HONSHU ARC / NORTHEASTERN HONSHU ARC / HOKKAIDO / YOTEI		42.8	42.8	140.6	140.6	SAE			s_YO166 [20534]	NOT GIVEN [20534]									VOL					WR [20534]	61.44	0.86		16.99				5.78	5.39	1.91	0.22		1.16	4.6	0.36
[20534]	CONVERGENT MARGIN	HONSHU ARC / NORTHEASTERN HONSHU ARC / HOKKAIDO / YOTEI		42.8	42.8	140.6	140.6	SAE			s_YO167 [20534]	NOT GIVEN [20534]									VOL					WR [20534]	61.52	0.88		17.22				5.94	5.49	2	0.22		1.15	4.54	0.38
[20534]	CONVERGENT MARGIN	HONSHU ARC / NORTHEASTERN HONSHU ARC / HOKKAIDO / YOTEI		42.8	42.8	140.6	140.6	SAE			s_YO37 [20534]	NOT GIVEN [20534]									VOL					WR [20534]	66.65	0.51		17.21				4.79	3.25	0.73	0.2		1.61	4.63	0.15
[20534]	CONVERGENT MARGIN	HONSHU ARC / NORTHEASTERN HONSHU ARC / HOKKAIDO / YOTEI		42.8	42.8	140.6	140.6	SAE			s_YO430 [20534]	NOT GIVEN [20534]									VOL					WR [20534]	68.26	0.48		15.5				4.29	3.18	0.71	0.18		1.81	4.95	0.13
[20534]	CONVERGENT MARGIN	HONSHU ARC / NORTHEASTERN HONSHU ARC / HOKKAIDO / YOTEI		42.8	42.8	140.6	140.6	SAE			s_YO431 [20534]	NOT GIVEN [20534]									VOL					WR [20534]	67.98	0.5		15.51				4.4	3.21	0.75	0.19		1.78	4.86	0.13
[20534]	CONVERGENT MARGIN	HONSHU ARC / NORTHEASTERN HONSHU ARC / HOKKAIDO / YOTEI		42.8	42.8	140.6	140.6	SAE			s_YO432 [20534]	NOT GIVEN [20534]									VOL					WR [20534]	67.64	0.48		15.37				4.44	3.18	0.73	0.19		1.78	4.99	0.13
[20534]	CONVERGENT MARGIN	HONSHU ARC / NORTHEASTERN HONSHU ARC / HOKKAIDO / YOTEI		42.8	42.8	140.6	140.6	SAE			s_YO433 [20534]	NOT GIVEN [20534]									VOL					WR [20534]	68.51	0.47		15.5				4.34	3.13	0.73	0.19		1.81	4.89	0.12
[20534]	CONVERGENT MARGIN	HONSHU ARC / NORTHEASTERN HONSHU ARC / HOKKAIDO / YOTEI		42.8	42.8	140.6	140.6	SAE			s_YO434 [20534]	NOT GIVEN [20534]									VOL					WR [20534]	66.81	0.46		15.25				4.37	3.24	0.73	0.19		1.82	5.01	0.13
[20534]	CONVERGENT MARGIN	HONSHU ARC / NORTHEASTERN HONSHU ARC / HOKKAIDO / YOTEI		42.8	42.8	140.6	140.6	SAE			s_YO435 [20534]	NOT GIVEN [20534]									VOL					WR [20534]	66.78	0.56		15.69				4.59	3.49	0.98	0.19		1.83	4.89	0.17
[20534]	CONVERGENT MARGIN	HONSHU ARC / NORTHEASTERN HONSHU ARC / HOKKAIDO / YOTEI		42.8	42.8	140.6	140.6	SAE			s_YO436 [20534]	NOT GIVEN [20534]									VOL					WR [20534]	65.21	0.63		15.87				4.86	3.85	1.15	0.2		1.66	4.87	0.22
[20534]	CONVERGENT MARGIN	HONSHU ARC / NORTHEASTERN HONSHU ARC / HOKKAIDO / YOTEI		42.8	42.8	140.6	140.6	SAE			s_YO437 [20534]	NOT GIVEN [20534]									VOL					WR [20534]	64.68	0.72		17.14				5.31	4.05	1.22	0.22		1.35	4.85	0.23
[20534]	CONVERGENT MARGIN	HONSHU ARC / NORTHEASTERN HONSHU ARC / HOKKAIDO / YOTEI		42.8	42.8	140.6	140.6	SAE			s_YO438 [20534]	NOT GIVEN [20534]									VOL					WR [20534]	64.34	0.65		16.27				5.07	3.97	1.16	0.21		1.53	4.89	0.22
[20534]	CONVERGENT MARGIN	HONSHU ARC / NORTHEASTERN HONSHU ARC / HOKKAIDO / YOTEI		42.8	42.8	140.6	140.6	SAE			s_YO439 [20534]	NOT GIVEN [20534]									VOL					WR [20534]	65.61	0.65		16.54				5.01	3.89	1.11	0.21		1.48	4.93	0.22
[20534]	CONVERGENT MARGIN	HONSHU ARC / NORTHEASTERN HONSHU ARC / HOKKAIDO / YOTEI		42.8	42.8	140.6	140.6	SAE			s_YO440 [20534]	NOT GIVEN [20534]									VOL					WR [20534]	65.66	0.65		16.35				5.02	3.83	1.11	0.21		1.55	4.68	0.22
[20534]	CONVERGENT MARGIN	HONSHU ARC / NORTHEASTERN HONSHU ARC / HOKKAIDO / YOTEI		42.8	42.8	140.6	140.6	SAE			s_YO441 [20534]	NOT GIVEN [20534]									VOL					WR [20534]	58.92	0.95		19.43				6.67	4.91	1.68	0.24		0.93	4.35	0.31
[20534]	CONVERGENT MARGIN	HONSHU ARC / NORTHEASTERN HONSHU ARC / HOKKAIDO / YOTEI		42.8	42.8	140.6	140.6	SAE			s_YO442 [20534]	NOT GIVEN [20534]									VOL					WR [20534]	63.75	0.76		16.47				5.39	4.41	1.48	0.21		1.41	4.71	0.28
[20534]	CONVERGENT MARGIN	HONSHU ARC / NORTHEASTERN HONSHU ARC / HOKKAIDO / YOTEI		42.8	42.8	140.6	140.6	SAE			s_YO443 [20534]	NOT GIVEN [20534]									VOL					WR [20534]	64.64	0.72		16.39				5.28	4.19	1.33	0.21		1.45	4.86	0.27
[20534]	CONVERGENT MARGIN	HONSHU ARC / NORTHEASTERN HONSHU ARC / HOKKAIDO / YOTEI		42.8	42.8	140.6	140.6	SAE			s_YO444 [20534]	NOT GIVEN [20534]									VOL					WR [20534]	66.35	0.6		16.36				4.83	3.62	1.05	0.2		1.65	4.89	0.19
[20534]	CONVERGENT MARGIN	HONSHU ARC / NORTHEASTERN HONSHU ARC / HOKKAIDO / YOTEI		42.8	42.8	140.6	140.6	SAE			s_YO445 [20534]	NOT GIVEN [20534]									VOL					WR [20534]	65.77	0.59		17.2				4.49	3.47	0.91	0.22		1.38	4.95	0.15
[20534]	CONVERGENT MARGIN	HONSHU ARC / NORTHEASTERN HONSHU ARC / HOKKAIDO / YOTEI		42.8	42.8	140.6	140.6	SAE			s_YO48 [20534]	NOT GIVEN [20534]									VOL					WR [20534]	66	0.64		17.16				5.18	3.81	1.07	0.21		1.44	4.87	0.23
[20534]	CONVERGENT MARGIN	HONSHU ARC / NORTHEASTERN HONSHU ARC / HOKKAIDO / YOTEI		42.8	42.8	140.6	140.6	SAE			s_YO139 [20534]	NOT GIVEN [20534]									VOL					WR [20534]	65.73	0.67		16.82				5.22	3.97	1.15	0.22		1.48	4.95	0.24
[20534]	CONVERGENT MARGIN	HONSHU ARC / NORTHEASTERN HONSHU ARC / HOKKAIDO / YOTEI		42.8	42.8	140.6	140.6	SAE			s_YO140 [20534]	NOT GIVEN [20534]									VOL					WR [20534]	65.71	0.6		16.11				4.8	3.71	1.04	0.2		1.71	4.93	0.2
[20534]	CONVERGENT MARGIN	HONSHU ARC / NORTHEASTERN HONSHU ARC / HOKKAIDO / YOTEI		42.8	42.8	140.6	140.6	SAE			s_YO143 [20534]	NOT GIVEN [20534]									VOL					WR [20534]	66.64	0.52		16.79				4.82	3.25	0.8	0.2		1.64	4.68	0.15
[20534]	CONVERGENT MARGIN	HONSHU ARC / NORTHEASTERN HONSHU ARC / HOKKAIDO / YOTEI		42.8	42.8	140.6	140.6	SAE			s_YO418 [20534]	NOT GIVEN [20534]									VOL					WR [20534]	65.45	0.76		16.6				4.96	4.26	1.31	0.2		1.51	4.55	0.27
[20534]	CONVERGENT MARGIN	HONSHU ARC / NORTHEASTERN HONSHU ARC / HOKKAIDO / YOTEI		42.8	42.8	140.6	140.6	SAE			s_YO419 [20534]	NOT GIVEN [20534]									VOL					WR [20534]	64.99	0.72		15.66				4.66	4.02	1.19	0.19		1.63	4.82	0.23
[20534]	CONVERGENT MARGIN	HONSHU ARC / NORTHEASTERN HONSHU ARC / HOKKAIDO / YOTEI		42.8	42.8	140.6	140.6	SAE			s_YO420 [20534]	NOT GIVEN [20534]									VOL					WR [20534]	64.58	0.72		15.67				4.6	4.1	1.19	0.18		1.62	4.76	0.23
[20534]	CONVERGENT MARGIN	HONSHU ARC / NORTHEASTERN HONSHU ARC / HOKKAIDO / YOTEI		42.8	42.8	140.6	140.6	SAE			s_YO421 [20534]	NOT GIVEN [20534]									VOL					WR [20534]	66.37	0.72		16.07				4.64	4.03	1.23	0.18		1.61	4.76	0.23
[20534]	CONVERGENT MARGIN	HONSHU ARC / NORTHEASTERN HONSHU ARC / HOKKAIDO / YOTEI		42.8	42.8	140.6	140.6	SAE			s_YO422 [20534]	NOT GIVEN [20534]									VOL					WR [20534]	66.63	0.72		15.82				4.63	3.95	1.21	0.18		1.63	4.83	0.23
[20534]	CONVERGENT MARGIN	HONSHU ARC / NORTHEASTERN HONSHU ARC / HOKKAIDO / YOTEI		42.8	42.8	140.6	140.6	SAE			s_YO423 [20534]	NOT GIVEN [20534]									VOL					WR [20534]	66.62	0.72		16.06				4.53	4.01	1.19	0.18		1.62	4.79	0.22
[20534]	CONVERGENT MARGIN	HONSHU ARC / NORTHEASTERN HONSHU ARC / HOKKAIDO / YOTEI		42.8	42.8	140.6	140.6	SAE			s_YO424 [20534]	NOT GIVEN [20534]									VOL					WR [20534]	64.48	0.71		15.57				4.73	4.14	1.24	0.19		1.6	4.86	0.23
[20534]	CONVERGENT MARGIN	HONSHU ARC / NORTHEASTERN HONSHU ARC / HOKKAIDO / YOTEI		42.8	42.8	140.6	140.6	SAE			s_YO425 [20534]	NOT GIVEN [20534]									VOL					WR [20534]	65.29	0.72		15.91				4.68	4.19	1.24	0.18		1.59	4.8	0.23
[20534]	CONVERGENT MARGIN	HONSHU ARC / NORTHEASTERN HONSHU ARC / HOKKAIDO / YOTEI		42.8	42.8	140.6	140.6	SAE			s_YO426 [20534]	NOT GIVEN [20534]									VOL					WR [20534]	64.73	0.73		15.62				4.77	4.16	1.29	0.19		1.59	4.8	0.24
[20534]	CONVERGENT MARGIN	HONSHU ARC / NORTHEASTERN HONSHU ARC / HOKKAIDO / YOTEI		42.8	42.8	140.6	140.6	SAE			s_YO427 [20534]	NOT GIVEN [20534]									VOL					WR [20534]	66.22	0.73		15.96				4.71	4.13	1.29	0.18		1.57	4.78	0.23
[20534]	CONVERGENT MARGIN	HONSHU ARC / NORTHEASTERN HONSHU ARC / HOKKAIDO / YOTEI		42.8	42.8	140.6	140.6	SAE			s_YO428 [20534]	NOT GIVEN [20534]									VOL					WR [20534]	64.32	0.72		16.01				4.7	4.18	1.21	0.19		1.56	4.54	0.23
[20534]	CONVERGENT MARGIN	HONSHU ARC / NORTHEASTERN HONSHU ARC / HOKKAIDO / YOTEI		42.8	42.8	140.6	140.6	SAE			s_YO429 [20534]	NOT GIVEN [20534]									VOL					WR [20534]	65.2	0.72		15.89				4.72	4.05	1.24	0.19		1.59	4.57	0.24
[20534]	CONVERGENT MARGIN	HONSHU ARC / NORTHEASTERN HONSHU ARC / HOKKAIDO / YOTEI		42.8	42.8	140.6	140.6	SAE			s_YO32 [20534]	NOT GIVEN [20534]									VOL					WR [20534]	66.4	0.73		16.11				4.85	4.15	1.3	0.19		1.6	4.73	0.24
[20534]	CONVERGENT MARGIN	HONSHU ARC / NORTHEASTERN HONSHU ARC / HOKKAIDO / YOTEI		42.8	42.8	140.6	140.6	SAE			s_YO34 [20534]	NOT GIVEN [20534]									VOL					WR [20534]	66.34	0.72		16.14				4.67	4.08	1.2	0.19		1.65	4.65	0.23
[20534]	CONVERGENT MARGIN	HONSHU ARC / NORTHEASTERN HONSHU ARC / HOKKAIDO / YOTEI		42.8	42.8	140.6	140.6	SAE			s_YO55 [20534]	NOT GIVEN [20534]									VOL					WR [20534]	65.61	0.72		16.08				4.72	4.11	1.22	0.19		1.59	4.71	0.23
[20534]	CONVERGENT MARGIN	HONSHU ARC / NORTHEASTERN HONSHU ARC / HOKKAIDO / YOTEI		42.8	42.8	140.6	140.6	SAE			s_YO455 [20534]	NOT GIVEN [20534]									VOL					WR [20534]	66.23	0.62		15.89				4.85	3.8	1.06	0.2		1.58	4.98	0.21
[20534]	CONVERGENT MARGIN	HONSHU ARC / NORTHEASTERN HONSHU ARC / HOKKAIDO / YOTEI		42.8	42.8	140.6	140.6	SAE			s_YO456 [20534]	NOT GIVEN [20534]									VOL					WR [20534]	65.39	0.61		15.64				4.84	3.79	1.11	0.2		1.68	4.79	0.2
[20534]	CONVERGENT MARGIN	HONSHU ARC / NORTHEASTERN HONSHU ARC / HOKKAIDO / YOTEI		42.8	42.8	140.6	140.6	SAE			s_YO457 [20534]	NOT GIVEN [20534]									VOL					WR [20534]	65.09	0.63		15.79				4.89	3.91	1.12	0.21		1.58	4.64	0.22
[20534]	CONVERGENT MARGIN	HONSHU ARC / NORTHEASTERN HONSHU ARC / HOKKAIDO / YOTEI		42.8	42.8	140.6	140.6	SAE			s_YO458 [20534]	NOT GIVEN [20534]									VOL					WR [20534]	66.2	0.63		15.95				4.86	3.84	1.12	0.2		1.61	4.78	0.22
[20534]	CONVERGENT MARGIN	HONSHU ARC / NORTHEASTERN HONSHU ARC / HOKKAIDO / YOTEI		42.8	42.8	140.6	140.6	SAE			s_YO459 [20534]	NOT GIVEN [20534]									VOL					WR [20534]	65.57	0.64		15.84				4.94	3.87	1.11	0.21		1.6	4.66	0.22
[20534]	CONVERGENT MARGIN	HONSHU ARC / NORTHEASTERN HONSHU ARC / HOKKAIDO / YOTEI		42.8	42.8	140.6	140.6	SAE			s_YO460 [20534]	NOT GIVEN [20534]									VOL					WR [20534]	64.19	0.7		15.91				5.23	4.18	1.29	0.21		1.48	4.93	0.27
[20534]	CONVERGENT MARGIN	HONSHU ARC / NORTHEASTERN HONSHU ARC / HOKKAIDO / YOTEI		42.8	42.8	140.6	140.6	SAE			s_YO461 [20534]	NOT GIVEN [20534]									VOL					WR [20534]	62.95	0.75		15.91				5.39	4.41	1.41	0.22		1.44	4.85	0.29
[20534]	CONVERGENT MARGIN	HONSHU ARC / NORTHEASTERN HONSHU ARC / HOKKAIDO / YOTEI		42.8	42.8	140.6	140.6	SAE			s_YO462 [20534]	NOT GIVEN [20534]									VOL					WR [20534]	66.64	0.54		15.53				4.56	3.49	0.89	0.19		1.75	4.96	0.17
[20534]	CONVERGENT MARGIN	HONSHU ARC / NORTHEASTERN HONSHU ARC / HOKKAIDO / YOTEI		42.8	42.8	140.6	140.6	SAE			s_YO463 [20534]	NOT GIVEN [20534]									VOL					WR [20534]	65.47	0.73		16.27				5.23	4.22	1.37	0.21		1.46	4.88	0.28
[20534]	CONVERGENT MARGIN	HONSHU ARC / NORTHEASTERN HONSHU ARC / HOKKAIDO / YOTEI		42.8	42.8	140.6	140.6	SAE			s_YO29 [20534]	NOT GIVEN [20534]									VOL					WR [20534]	67.01	0.64		16.39				5	3.82	1.11	0.21		1.55	4.56	0.22
[20534]	CONVERGENT MARGIN	HONSHU ARC / NORTHEASTERN HONSHU ARC / HOKKAIDO / YOTEI		42.8	42.8	140.6	140.6	SAE			s_YO47 [20534]	NOT GIVEN [20534]									VOL					WR [20534]	66.25	0.61		15.82				4.79	3.77	1.06	0.2		1.66	4.68	0.2
[20534]	CONVERGENT MARGIN	HONSHU ARC / NORTHEASTERN HONSHU ARC / HOKKAIDO / YOTEI		42.8	42.8	140.6	140.6	SAE			s_YO42 [20534]	NOT GIVEN [20534]									VOL					WR [20534]	67.75	0.58		15.91				4.71	3.61	1.02	0.2		1.74	4.9	0.19
[20534]	CONVERGENT MARGIN	HONSHU ARC / NORTHEASTERN HONSHU ARC / HOKKAIDO / YOTEI		42.8	42.8	140.6	140.6	SAE			s_YO57 [20534]	NOT GIVEN [20534]									VOL					WR [20534]	65.83	0.63		15.9				4.97	3.92	1.17	0.2		1.59	4.86	0.22
[20534]	CONVERGENT MARGIN	HONSHU ARC / NORTHEASTERN HONSHU ARC / HOKKAIDO / YOTEI		42.8	42.8	140.6	140.6	SAE			s_YO58 [20534]	NOT GIVEN [20534]									VOL					WR [20534]	61.7	0.94		17.75				6.43	5.06	1.89	0.23		1.1	4.45	0.39
[20534]	CONVERGENT MARGIN	HONSHU ARC / NORTHEASTERN HONSHU ARC / HOKKAIDO / YOTEI		42.8	42.8	140.6	140.6	SAE			s_YO134 [20534]	NOT GIVEN [20534]									VOL					WR [20534]	65.85	0.72		16.7				5.17	3.61	1	0.2		1.51	4.35	0.2
[20534]	CONVERGENT MARGIN	HONSHU ARC / NORTHEASTERN HONSHU ARC / HOKKAIDO / YOTEI		42.8	42.8	140.6	140.6	SAE			s_YO135 [20534]	NOT GIVEN [20534]									VOL					WR [20534]	67.54	0.67		15.74				4.84	3.62	1.01	0.19		1.64	4.87	0.19
[20534]	CONVERGENT MARGIN	HONSHU ARC / NORTHEASTERN HONSHU ARC / HOKKAIDO / YOTEI		42.8	42.8	140.6	140.6	SAE			s_YO40 [20534]	NOT GIVEN [20534]									VOL					WR [20534]	59.32	1.13		18.81				7.74	5.51	2.02	0.25		0.88	3.66	0.35
[20534]	CONVERGENT MARGIN	HONSHU ARC / NORTHEASTERN HONSHU ARC / HOKKAIDO / YOTEI		42.8	42.8	140.6	140.6	SAE			s_YO137 [20534]	NOT GIVEN [20534]									VOL					WR [20534]	58.97	1.11		18.23				7.61	5.98	2.31	0.24		0.89	4.27	0.37
[20534]	CONVERGENT MARGIN	HONSHU ARC / NORTHEASTERN HONSHU ARC / HOKKAIDO / YOTEI		42.8	42.8	140.6	140.6	SAE			s_YO138 [20534]	NOT GIVEN [20534]									VOL					WR [20534]	57.34	1.22		20.45				8.43	5.78	1.91	0.27		0.63	3.89	0.28
[20534]	CONVERGENT MARGIN	HONSHU ARC / NORTHEASTERN HONSHU ARC / HOKKAIDO / YOTEI		42.8	42.8	140.6	140.6	SAE			s_YO56 [20534]	NOT GIVEN [20534]									VOL					WR [20534]	60.28	1.03		16.89				7.06	5.89	2.42	0.23		1.11	4.39	0.44
[20534]	CONVERGENT MARGIN	HONSHU ARC / NORTHEASTERN HONSHU ARC / HOKKAIDO / YOTEI		42.8	42.8	140.6	140.6	SAE			s_YO133 [20534]	NOT GIVEN [20534]									VOL					WR [20534]	65.46	0.8		17.19				5.23	4.21	1.29	0.2		1.47	4.4	0.28
[20534]	CONVERGENT MARGIN	HONSHU ARC / NORTHEASTERN HONSHU ARC / HOKKAIDO / YOTEI		42.8	42.8	140.6	140.6	SAE			s_YO131 [20534]	NOT GIVEN [20534]									VOL					WR [20534]	66.41	0.76		15.88				4.83	3.86	1.17	0.2		1.63	4.89	0.22
[20534]	CONVERGENT MARGIN	HONSHU ARC / NORTHEASTERN HONSHU ARC / HOKKAIDO / YOTEI		42.8	42.8	140.6	140.6	SAE			s_YO132 [20534]	NOT GIVEN [20534]									VOL					WR [20534]	64.41	0.77		15.58				4.88	3.93	1.15	0.2		1.63	4.8	0.22
[20534]	CONVERGENT MARGIN	HONSHU ARC / NORTHEASTERN HONSHU ARC / HOKKAIDO / YOTEI		42.8	42.8	140.6	140.6	SAE			s_YO466 [20534]	NOT GIVEN [20534]									VOL					WR [20534]	65.13	0.63		16.17				4.52	3.69	1.03	0.2		1.62	4.68	0.19
[20534]	CONVERGENT MARGIN	HONSHU ARC / NORTHEASTERN HONSHU ARC / HOKKAIDO / YOTEI		42.8	42.8	140.6	140.6	SAE			s_YO467 [20534]	NOT GIVEN [20534]									VOL					WR [20534]	60.8	0.93		16.39				6.03	5.16	2	0.22		1.25	4.63	0.41
[20534]	CONVERGENT MARGIN	HONSHU ARC / NORTHEASTERN HONSHU ARC / HOKKAIDO / YOTEI		42.8	42.8	140.6	140.6	SAE			s_YO468 [20534]	NOT GIVEN [20534]									VOL					WR [20534]	62.29	0.93		16.8				5.86	5.16	1.97	0.22		1.24	4.69	0.41
[20534]	CONVERGENT MARGIN	HONSHU ARC / NORTHEASTERN HONSHU ARC / HOKKAIDO / YOTEI		42.8	42.8	140.6	140.6	SAE			s_YO469 [20534]	NOT GIVEN [20534]									VOL					WR [20534]	61.39	0.94		16.57				6.07	5.17	2.03	0.22		1.27	4.64	0.42
[20534]	CONVERGENT MARGIN	HONSHU ARC / NORTHEASTERN HONSHU ARC / HOKKAIDO / YOTEI		42.8	42.8	140.6	140.6	SAE			s_YO470 [20534]	NOT GIVEN [20534]									VOL					WR [20534]	65.34	0.58		15.53				4.24	3.59	0.95	0.2		1.71	5	0.17
[20534]	CONVERGENT MARGIN	HONSHU ARC / NORTHEASTERN HONSHU ARC / HOKKAIDO / YOTEI		42.8	42.8	140.6	140.6	SAE			s_YO471 [20534]	NOT GIVEN [20534]									VOL					WR [20534]	64.99	0.63		16				4.48	3.68	1.03	0.2		1.63	4.74	0.19
[20534]	CONVERGENT MARGIN	HONSHU ARC / NORTHEASTERN HONSHU ARC / HOKKAIDO / YOTEI		42.8	42.8	140.6	140.6	SAE			s_YO472 [20534]	NOT GIVEN [20534]									VOL					WR [20534]	67.6	0.61		16.27				4.26	3.51	1	0.19		1.64	4.85	0.17
[20534]	CONVERGENT MARGIN	HONSHU ARC / NORTHEASTERN HONSHU ARC / HOKKAIDO / YOTEI		42.8	42.8	140.6	140.6	SAE			s_YO473 [20534]	NOT GIVEN [20534]									VOL					WR [20534]	67.32	0.61		16.39				4.41	3.5	0.99	0.21		1.64	4.71	0.18
[20534]	CONVERGENT MARGIN	HONSHU ARC / NORTHEASTERN HONSHU ARC / HOKKAIDO / YOTEI		42.8	42.8	140.6	140.6	SAE			s_YO43 [20534]	NOT GIVEN [20534]									VOL					WR [20534]	67.91	0.59		16.41				4.37	3.49	0.96	0.2		1.66	4.69	0.18
[20534]	CONVERGENT MARGIN	HONSHU ARC / NORTHEASTERN HONSHU ARC / HOKKAIDO / YOTEI		42.8	42.8	140.6	140.6	SAE			s_YO44 [20534]	NOT GIVEN [20534]									VOL					WR [20534]	67.63	0.59		16.15				4.34	3.52	0.96	0.2		1.69	5	0.18
[20534]	CONVERGENT MARGIN	HONSHU ARC / NORTHEASTERN HONSHU ARC / HOKKAIDO / YOTEI		42.8	42.8	140.6	140.6	SAE			s_YO136 [20534]	NOT GIVEN [20534]									VOL					WR [20534]	61.68	0.93		16.54				6.06	5.21	2	0.22		1.25	4.71	0.42
[20534]	CONVERGENT MARGIN	HONSHU ARC / NORTHEASTERN HONSHU ARC / HOKKAIDO / YOTEI		42.8	42.8	140.6	140.6	SAE			s_YO18 [20534]	NOT GIVEN [20534]									VOL					WR [20534]	64.99	0.91		16.2				5.72	4.44	1.5	0.21		1.55	4.6	0.33
[20534]	CONVERGENT MARGIN	HONSHU ARC / NORTHEASTERN HONSHU ARC / HOKKAIDO / YOTEI		42.8	42.8	140.6	140.6	SAE			s_YO145 [20534]	NOT GIVEN [20534]									VOL					WR [20534]	62.97	0.94		15.94				5.94	4.83	1.69	0.22		1.52	4.59	0.35
[20534]	CONVERGENT MARGIN	HONSHU ARC / NORTHEASTERN HONSHU ARC / HOKKAIDO / YOTEI		42.8	42.8	140.6	140.6	SAE			s_YO130 [20534]	NOT GIVEN [20534]									VOL					WR [20534]	62.47	0.9		17.66				6.1	5.64	1.74	0.21		1.21	4.46	0.32
[20534]	CONVERGENT MARGIN	HONSHU ARC / NORTHEASTERN HONSHU ARC / HOKKAIDO / YOTEI		42.8	42.8	140.6	140.6	SAE			s_YO144 [20534]	NOT GIVEN [20534]									VOL					WR [20534]	60.99	0.91		17.35				6.13	5.8	1.78	0.21		1.17	4.44	0.32
[20534]	CONVERGENT MARGIN	HONSHU ARC / NORTHEASTERN HONSHU ARC / HOKKAIDO / YOTEI		42.8	42.8	140.6	140.6	SAE			s_YO464 [20534]	NOT GIVEN [20534]									VOL					WR [20534]	61.28	0.89		17.2				6.04	5.62	1.77	0.21		1.21	4.42	0.32
[20534]	CONVERGENT MARGIN	HONSHU ARC / NORTHEASTERN HONSHU ARC / HOKKAIDO / YOTEI		42.8	42.8	140.6	140.6	SAE			s_YO465 [20534]	NOT GIVEN [20534]									VOL					WR [20534]	60.52	0.91		17.08				6.24	5.64	1.81	0.21		1.18	4.39	0.33
[20534]	CONVERGENT MARGIN	HONSHU ARC / NORTHEASTERN HONSHU ARC / HOKKAIDO / YOTEI		42.8	42.8	140.6	140.6	SAE			s_YO128 [20534]	NOT GIVEN [20534]									VOL					WR [20534]	67.11	0.66		15.7				4.57	3.59	1	0.2		1.62	5.04	0.19
[20534]	CONVERGENT MARGIN	HONSHU ARC / NORTHEASTERN HONSHU ARC / HOKKAIDO / YOTEI		42.8	42.8	140.6	140.6	SAE			s_YO129 [20534]	NOT GIVEN [20534]									VOL					WR [20534]	63.91	0.88		16.3				5.84	4.4	1.44	0.23		1.35	4.84	0.31
[20534]	CONVERGENT MARGIN	HONSHU ARC / NORTHEASTERN HONSHU ARC / HOKKAIDO / YOTEI		42.8	42.8	140.6	140.6	SAE			s_YO21 [20534]	NOT GIVEN [20534]									VOL					WR [20534]	67.9	0.66		15.91				4.65	3.58	1.03	0.2		1.64	4.96	0.19
[20534]	CONVERGENT MARGIN	HONSHU ARC / NORTHEASTERN HONSHU ARC / HOKKAIDO / YOTEI		42.8	42.8	140.6	140.6	SAE			s_YO25 [20534]	NOT GIVEN [20534]									VOL					WR [20534]	67.64	0.67		16.14				4.67	3.7	1.08	0.2		1.59	4.73	0.2
[20534]	CONVERGENT MARGIN	HONSHU ARC / NORTHEASTERN HONSHU ARC / HOKKAIDO / YOTEI		42.8	42.8	140.6	140.6	SAE			s_YO31 [20534]	NOT GIVEN [20534]									VOL					WR [20534]	67.43	0.72		15.93				4.66	3.69	1.15	0.2		1.62	4.97	0.21
[20534]	CONVERGENT MARGIN	HONSHU ARC / NORTHEASTERN HONSHU ARC / HOKKAIDO / YOTEI		42.8	42.8	140.6	140.6	SAE			s_YO38 [20534]	NOT GIVEN [20534]									VOL					WR [20534]	67.21	0.71		16.02				4.66	3.72	1.15	0.21		1.62	4.85	0.22
[20534]	CONVERGENT MARGIN	HONSHU ARC / NORTHEASTERN HONSHU ARC / HOKKAIDO / YOTEI		42.8	42.8	140.6	140.6	SAE			s_YO23 [20534]	NOT GIVEN [20534]									VOL					WR [20534]	64.26	0.8		17.54				4.73	4.92	1.51	0.21		1.26	4.84	0.29
[20534]	CONVERGENT MARGIN	HONSHU ARC / NORTHEASTERN HONSHU ARC / HOKKAIDO / YOTEI		42.8	42.8	140.6	140.6	SAE			s_YO126 [20534]	NOT GIVEN [20534]									VOL					WR [20534]	65.05	0.78		16.97				4.63	4.52	1.44	0.2		1.34	5.09	0.25
[20534]	CONVERGENT MARGIN	HONSHU ARC / NORTHEASTERN HONSHU ARC / HOKKAIDO / YOTEI		42.8	42.8	140.6	140.6	SAE			s_YO127 [20534]	NOT GIVEN [20534]									VOL					WR [20534]	64.31	0.82		17.22				4.85	4.82	1.56	0.21		1.28	4.93	0.29
[20534]	CONVERGENT MARGIN	HONSHU ARC / NORTHEASTERN HONSHU ARC / HOKKAIDO / YOTEI		42.8	42.8	140.6	140.6	SAE			s_YO475 [20534]	NOT GIVEN [20534]									VOL					WR [20534]	65.58	0.61		15.5				4.22	3.69	1.04	0.2		1.67	4.9	0.17
[20534]	CONVERGENT MARGIN	HONSHU ARC / NORTHEASTERN HONSHU ARC / HOKKAIDO / YOTEI		42.8	42.8	140.6	140.6	SAE			s_YO476 [20534]	NOT GIVEN [20534]									VOL					WR [20534]	67.01	0.62		15.97				4.38	3.79	1.14	0.2		1.59	4.89	0.18
[20534]	CONVERGENT MARGIN	HONSHU ARC / NORTHEASTERN HONSHU ARC / HOKKAIDO / YOTEI		42.8	42.8	140.6	140.6	SAE			s_YO477 [20534]	NOT GIVEN [20534]									VOL					WR [20534]	65.31	0.65		15.74				4.46	3.88	1.15	0.2		1.59	4.97	0.2
[20534]	CONVERGENT MARGIN	HONSHU ARC / NORTHEASTERN HONSHU ARC / HOKKAIDO / YOTEI		42.8	42.8	140.6	140.6	SAE			s_YO478 [20534]	NOT GIVEN [20534]									VOL					WR [20534]	66.69	0.67		16.1				4.54	3.9	1.23	0.2		1.56	4.93	0.21
[20534]	CONVERGENT MARGIN	HONSHU ARC / NORTHEASTERN HONSHU ARC / HOKKAIDO / YOTEI		42.8	42.8	140.6	140.6	SAE			s_YO479 [20534]	NOT GIVEN [20534]									VOL					WR [20534]	67.31	0.65		16.19				4.36	3.66	1.1	0.2		1.6	4.8	0.19
[20534]	CONVERGENT MARGIN	HONSHU ARC / NORTHEASTERN HONSHU ARC / HOKKAIDO / YOTEI		42.8	42.8	140.6	140.6	SAE			s_YO480 [20534]	NOT GIVEN [20534]									VOL					WR [20534]	64.61	0.7		16.09				4.77	4.17	1.33	0.21		1.54	4.65	0.23
[20534]	CONVERGENT MARGIN	HONSHU ARC / NORTHEASTERN HONSHU ARC / HOKKAIDO / YOTEI		42.8	42.8	140.6	140.6	SAE			s_YO481 [20534]	NOT GIVEN [20534]									VOL					WR [20534]	66.45	0.68		16.21				4.55	3.95	1.24	0.2		1.56	4.86	0.21
[20534]	CONVERGENT MARGIN	HONSHU ARC / NORTHEASTERN HONSHU ARC / HOKKAIDO / YOTEI		42.8	42.8	140.6	140.6	SAE			s_YO482 [20534]	NOT GIVEN [20534]									VOL					WR [20534]	62.55	0.9		17.16				5.8	5.08	1.93	0.23		1.19	4.49	0.33
[20534]	CONVERGENT MARGIN	HONSHU ARC / NORTHEASTERN HONSHU ARC / HOKKAIDO / YOTEI		42.8	42.8	140.6	140.6	SAE			s_YO483 [20534]	NOT GIVEN [20534]									VOL					WR [20534]	65.55	0.62		15.73				4.37	3.75	1.09	0.2		1.66	4.89	0.19
[20534]	CONVERGENT MARGIN	HONSHU ARC / NORTHEASTERN HONSHU ARC / HOKKAIDO / YOTEI		42.8	42.8	140.6	140.6	SAE			s_YO484 [20534]	NOT GIVEN [20534]									VOL					WR [20534]	59.63	1.06		17.58				6.88	6.15	2.59	0.24		0.93	4.34	0.39
[20534]	CONVERGENT MARGIN	HONSHU ARC / NORTHEASTERN HONSHU ARC / HOKKAIDO / YOTEI		42.8	42.8	140.6	140.6	SAE			s_YO485 [20534]	NOT GIVEN [20534]									VOL					WR [20534]	59.03	1.04		17.21				6.71	6.02	2.48	0.24		0.96	4.38	0.39
[20534]	CONVERGENT MARGIN	HONSHU ARC / NORTHEASTERN HONSHU ARC / HOKKAIDO / YOTEI		42.8	42.8	140.6	140.6	SAE			s_YO119 [20534]	NOT GIVEN [20534]									VOL					WR [20534]	67.99	0.61		16.06				4.23	3.57	1	0.2		1.67	4.8	0.18
[20534]	CONVERGENT MARGIN	HONSHU ARC / NORTHEASTERN HONSHU ARC / HOKKAIDO / YOTEI		42.8	42.8	140.6	140.6	SAE			s_YO52 [20534]	NOT GIVEN [20534]									VOL					WR [20534]	66.58	0.68		16.25				4.56	3.86	1.22	0.2		1.58	4.61	0.21
[20534]	CONVERGENT MARGIN	HONSHU ARC / NORTHEASTERN HONSHU ARC / HOKKAIDO / YOTEI		42.8	42.8	140.6	140.6	SAE			s_YO54 [20534]	NOT GIVEN [20534]									VOL					WR [20534]	58.58	1.07		17.56				7.05	6.29	2.64	0.24		0.93	4.24	0.39
[20534]	CONVERGENT MARGIN	HONSHU ARC / NORTHEASTERN HONSHU ARC / HOKKAIDO / YOTEI		42.8	42.8	140.6	140.6	SAE			s_YO35 [20534]	NOT GIVEN [20534]									VOL					WR [20534]	59.39	1.07		17.69				7.12	6.31	2.68	0.25		0.93	4.25	0.39
[20534]	CONVERGENT MARGIN	HONSHU ARC / NORTHEASTERN HONSHU ARC / HOKKAIDO / YOTEI		42.8	42.8	140.6	140.6	SAE			s_YO33 [20534]	NOT GIVEN [20534]									VOL					WR [20534]	66.99	0.69		16.46				4.67	4.01	1.27	0.2		1.55	4.69	0.22
[20534]	CONVERGENT MARGIN	HONSHU ARC / NORTHEASTERN HONSHU ARC / HOKKAIDO / YOTEI		42.8	42.8	140.6	140.6	SAE			s_YO39 [20534]	NOT GIVEN [20534]									VOL					WR [20534]	66.11	0.68		16.13				4.72	3.98	1.3	0.2		1.59	4.79	0.22
[20534]	CONVERGENT MARGIN	HONSHU ARC / NORTHEASTERN HONSHU ARC / HOKKAIDO / YOTEI		42.8	42.8	140.6	140.6	SAE			s_YO449 [20534]	NOT GIVEN [20534]									VOL					WR [20534]	60.72	0.97		16.06				6.35	5.36	2.1	0.22		1.35	4.44	0.34
[20534]	CONVERGENT MARGIN	HONSHU ARC / NORTHEASTERN HONSHU ARC / HOKKAIDO / YOTEI		42.8	42.8	140.6	140.6	SAE			s_YO450 [20534]	NOT GIVEN [20534]									VOL					WR [20534]	64.73	0.84		16.12				5.34	4.27	1.39	0.2		1.54	4.68	0.28
[20534]	CONVERGENT MARGIN	HONSHU ARC / NORTHEASTERN HONSHU ARC / HOKKAIDO / YOTEI		42.8	42.8	140.6	140.6	SAE			s_YO451 [20534]	NOT GIVEN [20534]									VOL					WR [20534]	64.84	0.84		16.1				5.34	4.3	1.45	0.2		1.56	4.68	0.28
[20534]	CONVERGENT MARGIN	HONSHU ARC / NORTHEASTERN HONSHU ARC / HOKKAIDO / YOTEI		42.8	42.8	140.6	140.6	SAE			s_YO452 [20534]	NOT GIVEN [20534]									VOL					WR [20534]	64.49	0.84		16.13				5.34	4.35	1.43	0.2		1.54	4.65	0.29
[20534]	CONVERGENT MARGIN	HONSHU ARC / NORTHEASTERN HONSHU ARC / HOKKAIDO / YOTEI		42.8	42.8	140.6	140.6	SAE			s_YO453 [20534]	NOT GIVEN [20534]									VOL					WR [20534]	63.62	0.87		16.23				5.67	4.65	1.62	0.21		1.44	4.62	0.31
[20534]	CONVERGENT MARGIN	HONSHU ARC / NORTHEASTERN HONSHU ARC / HOKKAIDO / YOTEI		42.8	42.8	140.6	140.6	SAE			s_YO454 [20534]	NOT GIVEN [20534]									VOL					WR [20534]	62.6	0.86		15.75				5.56	4.6	1.56	0.21		1.49	4.67	0.3
[20534]	CONVERGENT MARGIN	HONSHU ARC / NORTHEASTERN HONSHU ARC / HOKKAIDO / YOTEI		42.8	42.8	140.6	140.6	SAE			s_YO28 [20534]	NOT GIVEN [20534]									VOL					WR [20534]	65.74	0.84		16.32				5.4	4.29	1.4	0.2		1.54	4.69	0.29
[20534]	CONVERGENT MARGIN	HONSHU ARC / NORTHEASTERN HONSHU ARC / HOKKAIDO / YOTEI		42.8	42.8	140.6	140.6	SAE			s_YO36 [20534]	NOT GIVEN [20534]									VOL					WR [20534]	65.03	0.85		16.26				5.51	4.43	1.51	0.21		1.54	4.64	0.3
[20534]	CONVERGENT MARGIN	HONSHU ARC / NORTHEASTERN HONSHU ARC / HOKKAIDO / YOTEI		42.8	42.8	140.6	140.6	SAE			s_YO46 [20534]	NOT GIVEN [20534]									VOL					WR [20534]	63.49	0.94		16.58				6.14	5.07	1.92	0.21		1.42	4.48	0.34
[20534]	CONVERGENT MARGIN	HONSHU ARC / NORTHEASTERN HONSHU ARC / HOKKAIDO / YOTEI		42.8	42.8	140.6	140.6	SAE			s_YO51 [20534]	NOT GIVEN [20534]									VOL					WR [20534]	63.6	0.86		15.95				5.48	4.5	1.5	0.21		1.52	4.65	0.3
[20534]	CONVERGENT MARGIN	HONSHU ARC / NORTHEASTERN HONSHU ARC / HOKKAIDO / YOTEI		42.8	42.8	140.6	140.6	SAE			s_YO53 [20534]	NOT GIVEN [20534]									VOL					WR [20534]	64.42	0.83		16.12				5.41	4.36	1.41	0.2		1.54	4.68	0.29
[20534]	CONVERGENT MARGIN	HONSHU ARC / NORTHEASTERN HONSHU ARC / HOKKAIDO / YOTEI		42.8	42.8	140.6	140.6	SAE			s_YO13 [20534]	NOT GIVEN [20534]									VOL					WR [20534]	55.38	1.04		19.84				7.84	8.86	2.49	0.19		0.79	3.24	0.27
[20534]	CONVERGENT MARGIN	HONSHU ARC / NORTHEASTERN HONSHU ARC / HOKKAIDO / YOTEI		42.8	42.8	140.6	140.6	SAE			s_YO3 [20534]	NOT GIVEN [20534]									VOL					WR [20534]	55.64	1.06		19.96				7.98	8.71	2.49	0.19		0.78	3.1	0.27
[20534]	CONVERGENT MARGIN	HONSHU ARC / NORTHEASTERN HONSHU ARC / HOKKAIDO / YOTEI		42.8	42.8	140.6	140.6	SAE			s_YO446 [20534]	NOT GIVEN [20534]									VOL					WR [20534]	54.94	1.05		19.75				7.8	8.7	2.37	0.19		0.78	3.15	0.27
[20534]	CONVERGENT MARGIN	HONSHU ARC / NORTHEASTERN HONSHU ARC / HOKKAIDO / YOTEI		42.8	42.8	140.6	140.6	SAE			s_YO447 [20534]	NOT GIVEN [20534]									VOL					WR [20534]	53.92	1.06		19.22				8	8.65	2.44	0.19		0.79	3.17	0.27
[20534]	CONVERGENT MARGIN	HONSHU ARC / NORTHEASTERN HONSHU ARC / HOKKAIDO / YOTEI		42.8	42.8	140.6	140.6	SAE			s_YO448 [20534]	NOT GIVEN [20534]									VOL					WR [20534]	54.28	1.04		19.83				7.92	8.81	2.43	0.19		0.75	3.14	0.26
[20534]	CONVERGENT MARGIN	HONSHU ARC / NORTHEASTERN HONSHU ARC / HOKKAIDO / YOTEI		42.8	42.8	140.6	140.6	SAE			s_YO19 [20534]	NOT GIVEN [20534]									VOL					WR [20534]	65.15	0.84		16.89				5.06	4.69	1.59	0.2		1.43	4.6	0.31
[20534]	CONVERGENT MARGIN	HONSHU ARC / NORTHEASTERN HONSHU ARC / HOKKAIDO / YOTEI		42.8	42.8	140.6	140.6	SAE			s_YO24 [20534]	NOT GIVEN [20534]									VOL					WR [20534]	64.56	0.85		17.01				5.17	4.83	1.66	0.2		1.39	4.53	0.32
[20534]	CONVERGENT MARGIN	HONSHU ARC / NORTHEASTERN HONSHU ARC / HOKKAIDO / YOTEI		42.8	42.8	140.6	140.6	SAE			s_YO123 [20534]	NOT GIVEN [20534]									VOL					WR [20534]	63.6	0.87		16.73				5.42	5.14	1.8	0.2		1.33	4.59	0.33
[20534]	CONVERGENT MARGIN	HONSHU ARC / NORTHEASTERN HONSHU ARC / HOKKAIDO / YOTEI		42.8	42.8	140.6	140.6	SAE			s_YO14 [20534]	NOT GIVEN [20534]									VOL					WR [20534]	65.74	0.76		17.06				4.58	4.62	1.34	0.17		1.62	4.32	0.27
[20534]	CONVERGENT MARGIN	HONSHU ARC / NORTHEASTERN HONSHU ARC / HOKKAIDO / YOTEI		42.8	42.8	140.6	140.6	SAE			s_YO124 [20534]	NOT GIVEN [20534]									VOL					WR [20534]	64.92	0.77		16.36				4.63	4.63	1.38	0.17		1.67	4.48	0.26
[20534]	CONVERGENT MARGIN	HONSHU ARC / NORTHEASTERN HONSHU ARC / HOKKAIDO / YOTEI		42.8	42.8	140.6	140.6	SAE			s_YO125 [20534]	NOT GIVEN [20534]									VOL					WR [20534]	65.32	0.77		16.32				4.57	4.62	1.37	0.17		1.67	4.57	0.25
[20534]	CONVERGENT MARGIN	HONSHU ARC / NORTHEASTERN HONSHU ARC / HOKKAIDO / YOTEI		42.8	42.8	140.6	140.6	SAE			s_YO413 [20534]	NOT GIVEN [20534]									VOL					WR [20534]	56.02	0.85		21.12				5.89	7.95	1.61	0.16		0.88	3.57	0.29
[20534]	CONVERGENT MARGIN	HONSHU ARC / NORTHEASTERN HONSHU ARC / HOKKAIDO / YOTEI		42.8	42.8	140.6	140.6	SAE			s_YO414 [20534]	NOT GIVEN [20534]									VOL					WR [20534]	54.36	0.88		21.93				6.09	7.92	1.55	0.15		0.78	3.42	0.31
[20534]	CONVERGENT MARGIN	HONSHU ARC / NORTHEASTERN HONSHU ARC / HOKKAIDO / YOTEI		42.8	42.8	140.6	140.6	SAE			s_YO415 [20534]	NOT GIVEN [20534]									VOL					WR [20534]	55.81	0.88		20.95				6.13	7.68	1.68	0.16		0.88	3.54	0.3
[20534]	CONVERGENT MARGIN	HONSHU ARC / NORTHEASTERN HONSHU ARC / HOKKAIDO / YOTEI		42.8	42.8	140.6	140.6	SAE			s_YO492 [20534]	NOT GIVEN [20534]									VOL					WR [20534]	57.25	1.05		17.76				8.2	7.04	3.31	0.21		0.87	3.34	0.27
[20534]	CONVERGENT MARGIN	HONSHU ARC / NORTHEASTERN HONSHU ARC / HOKKAIDO / YOTEI		42.8	42.8	140.6	140.6	SAE			s_YO493 [20534]	NOT GIVEN [20534]									VOL					WR [20534]	54.95	1.16		19.24				9.04	6.97	3.42	0.23		0.72	3.09	0.3
[20534]	CONVERGENT MARGIN	HONSHU ARC / NORTHEASTERN HONSHU ARC / HOKKAIDO / YOTEI		42.8	42.8	140.6	140.6	SAE			s_YO494 [20534]	NOT GIVEN [20534]									VOL					WR [20534]	55.49	1.04		17.28				8.51	7.22	3.39	0.21		0.86	3.34	0.26
[20534]	CONVERGENT MARGIN	HONSHU ARC / NORTHEASTERN HONSHU ARC / HOKKAIDO / YOTEI		42.8	42.8	140.6	140.6	SAE			s_YO6 [20534]	NOT GIVEN [20534]									VOL					WR [20534]	61.14	0.83		17.11				6.57	6.16	2.44	0.2		1.18	3.74	0.28
[20534]	CONVERGENT MARGIN	HONSHU ARC / NORTHEASTERN HONSHU ARC / HOKKAIDO / YOTEI		42.8	42.8	140.6	140.6	SAE			s_YO7 [20534]	NOT GIVEN [20534]									VOL					WR [20534]	58.01	0.93		17.3				7.61	6.62	2.89	0.22		0.98	3.44	0.28
[20534]	CONVERGENT MARGIN	HONSHU ARC / NORTHEASTERN HONSHU ARC / HOKKAIDO / YOTEI		42.8	42.8	140.6	140.6	SAE			s_YO8 [20534]	NOT GIVEN [20534]									VOL					WR [20534]	61.47	0.86		16.91				6.87	6.02	2.58	0.2		1.18	3.67	0.28
[20534]	CONVERGENT MARGIN	HONSHU ARC / NORTHEASTERN HONSHU ARC / HOKKAIDO / YOTEI		42.8	42.8	140.6	140.6	SAE			s_YO9 [20534]	NOT GIVEN [20534]									VOL					WR [20534]	60.7	0.86		17.21				7.17	6.23	2.68	0.21		1.11	3.65	0.29
[20534]	CONVERGENT MARGIN	HONSHU ARC / NORTHEASTERN HONSHU ARC / HOKKAIDO / YOTEI		42.8	42.8	140.6	140.6	SAE			s_YO10 [20534]	NOT GIVEN [20534]									VOL					WR [20534]	59.74	0.95		17.64				7.64	6.52	2.95	0.22		0.99	3.44	0.29
[20534]	CONVERGENT MARGIN	HONSHU ARC / NORTHEASTERN HONSHU ARC / HOKKAIDO / YOTEI		42.8	42.8	140.6	140.6	SAE			s_YO12 [20534]	NOT GIVEN [20534]									VOL					WR [20534]	61.72	0.75		18.84				5.1	6.13	1.88	0.17		1.05	3.99	0.28
[20534]	CONVERGENT MARGIN	HONSHU ARC / NORTHEASTERN HONSHU ARC / HOKKAIDO / YOTEI		42.8	42.8	140.6	140.6	SAE			s_YO49 [20534]	NOT GIVEN [20534]									VOL					WR [20534]	62.75	0.71		18.84				4.62	6.18	1.59	0.16		1.11	4.13	0.28
[20534]	CONVERGENT MARGIN	HONSHU ARC / NORTHEASTERN HONSHU ARC / HOKKAIDO / YOTEI		42.8	42.8	140.6	140.6	SAE			s_YO17 [20534]	NOT GIVEN [20534]									VOL					WR [20534]	55.8	0.83		17.96				8.09	7.82	3.92	0.21		0.79	3.06	0.26
[20534]	CONVERGENT MARGIN	HONSHU ARC / NORTHEASTERN HONSHU ARC / HOKKAIDO / YOTEI		42.8	42.8	140.6	140.6	SAE			s_YO15 [20534]	NOT GIVEN [20534]									VOL					WR [20534]	55.1	0.81		18.16				8.12	7.94	4.05	0.21		0.73	2.9	0.26
[20534]	CONVERGENT MARGIN	HONSHU ARC / NORTHEASTERN HONSHU ARC / HOKKAIDO / YOTEI		42.8	42.8	140.6	140.6	SAE			s_YO26 [20534]	NOT GIVEN [20534]									VOL					WR [20534]	55.92	0.83		18.18				8.18	7.95	4.14	0.21		0.72	2.9	0.27
[20534]	CONVERGENT MARGIN	HONSHU ARC / NORTHEASTERN HONSHU ARC / HOKKAIDO / YOTEI		42.8	42.8	140.6	140.6	SAE			s_YO1 [20534]	NOT GIVEN [20534]									VOL					WR [20534]	66.74	0.54		15.99				4.29	4.44	1.46	0.19		1.34	4.26	0.23
[20534]	CONVERGENT MARGIN	HONSHU ARC / NORTHEASTERN HONSHU ARC / HOKKAIDO / YOTEI		42.8	42.8	140.6	140.6	SAE			s_YO5 [20534]	NOT GIVEN [20534]									VOL					WR [20534]	67.22	0.51		16.9				4.15	4.7	1.43	0.19		1.25	4.29	0.23
[20534]	CONVERGENT MARGIN	HONSHU ARC / NORTHEASTERN HONSHU ARC / HOKKAIDO / YOTEI		42.8	42.8	140.6	140.6	SAE			s_YO11 [20534]	NOT GIVEN [20534]									VOL					WR [20534]	57.1	0.89		18.03				8.02	7.55	3.28	0.25		0.75	3.5	0.33
[20534]	CONVERGENT MARGIN	HONSHU ARC / NORTHEASTERN HONSHU ARC / HOKKAIDO / YOTEI		42.8	42.8	140.6	140.6	SAE			s_YO16 [20534]	NOT GIVEN [20534]									VOL					WR [20534]	57.07	0.91		18.28				8.14	7.64	3.35	0.25		0.72	3.46	0.33
[20534]	CONVERGENT MARGIN	HONSHU ARC / NORTHEASTERN HONSHU ARC / HOKKAIDO / YOTEI		42.8	42.8	140.6	140.6	SAE			s_YO20 [20534]	NOT GIVEN [20534]									VOL					WR [20534]	57.53	0.88		18.09				7.84	7.5	3.21	0.25		0.75	3.57	0.34
[20534]	CONVERGENT MARGIN	HONSHU ARC / NORTHEASTERN HONSHU ARC / HOKKAIDO / YOTEI		42.8	42.8	140.6	140.6	SAE			s_YO486 [20534]	NOT GIVEN [20534]									VOL					WR [20534]	56.4	0.88		18.35				7.72	7.13	3.04	0.25		0.7	3.57	0.29
[20534]	CONVERGENT MARGIN	HONSHU ARC / NORTHEASTERN HONSHU ARC / HOKKAIDO / YOTEI		42.8	42.8	140.6	140.6	SAE			s_YO487 [20534]	NOT GIVEN [20534]									VOL					WR [20534]	65.58	0.61		16.25				4.83	4.82	1.72	0.21		1.22	4.17	0.26
[20534]	CONVERGENT MARGIN	HONSHU ARC / NORTHEASTERN HONSHU ARC / HOKKAIDO / YOTEI		42.8	42.8	140.6	140.6	SAE			s_YO488 [20534]	NOT GIVEN [20534]									VOL					WR [20534]	54.85	0.93		18.15				8.34	7.71	3.37	0.26		0.65	3.42	0.32
[20534]	CONVERGENT MARGIN	HONSHU ARC / NORTHEASTERN HONSHU ARC / HOKKAIDO / YOTEI		42.8	42.8	140.6	140.6	SAE			s_YO489 [20534]	NOT GIVEN [20534]									VOL					WR [20534]	54.12	0.94		18.27				8.42	7.82	3.42	0.27		0.62	3.35	0.3
[20534]	CONVERGENT MARGIN	HONSHU ARC / NORTHEASTERN HONSHU ARC / HOKKAIDO / YOTEI		42.8	42.8	140.6	140.6	SAE			s_YO490 [20534]	NOT GIVEN [20534]									VOL					WR [20534]	58.79	0.83		18.02				7.22	6.84	2.9	0.24		0.81	3.64	0.32
[20534]	CONVERGENT MARGIN	HONSHU ARC / NORTHEASTERN HONSHU ARC / HOKKAIDO / YOTEI		42.8	42.8	140.6	140.6	SAE			s_YO491 [20534]	NOT GIVEN [20534]									VOL					WR [20534]	54.35	1.17		17.88				8.79	7.82	3.63	0.26		0.87	3.45	0.27
[20534]	CONVERGENT MARGIN	HONSHU ARC / NORTHEASTERN HONSHU ARC / HOKKAIDO / YOTEI		42.8	42.8	140.6	140.6	SAE			s_YO2 [20534]	NOT GIVEN [20534]									VOL					WR [20534]	70.38	0.46		16.98				3.11	2.55	0.64	0.17		1.67	4.36	0.12
[20534]	CONVERGENT MARGIN	HONSHU ARC / NORTHEASTERN HONSHU ARC / HOKKAIDO / YOTEI		42.8	42.8	140.6	140.6	SAE			s_YO4 [20534]	NOT GIVEN [20534]									VOL					WR [20534]	70.51	0.42		16.95				2.99	2.52	0.58	0.16		1.66	4.45	0.11
[20534]	CONVERGENT MARGIN	HONSHU ARC / NORTHEASTERN HONSHU ARC / HOKKAIDO / YOTEI		42.8	42.8	140.6	140.6	SAE			s_YO121 [20534]	NOT GIVEN [20534]									VOL					WR [20534]	66.16	0.52		16.27				4.1	4.26	1.3	0.21		1.26	4.69	0.21
[20534]	CONVERGENT MARGIN	HONSHU ARC / NORTHEASTERN HONSHU ARC / HOKKAIDO / YOTEI		42.8	42.8	140.6	140.6	SAE			s_YO120 [20534]	NOT GIVEN [20534]									VOL					WR [20534]	65.57	0.52		18.03				4.11	4.45	1.25	0.2		1.17	4.47	0.23
[20534]	CONVERGENT MARGIN	HONSHU ARC / NORTHEASTERN HONSHU ARC / HOKKAIDO / YOTEI		42.8	42.8	140.6	140.6	SAE			s_YO122 [20534]	NOT GIVEN [20534]									VOL					WR [20534]	69.34	0.35		15.95				2.94	3.45	0.75	0.19		1.46	4.96	0.17
[3980]	CONVERGENT MARGIN	HONSHU ARC / SOUTHWESTERN HONSHU ARC / SHIKOKU/SIKOKU	UWAJIMA, SHIMANO BELT	33.22	33.22	132.53	132.53	SAE			s_1302HOST [3980]	GRANODIORITE, BIOTITE-CORDIERITE [3980]			MIDDLE [3980]	MIOCENE [3980]					PLU					WR [3980]	66.79	0.81		16.04				4.92	2.96	2.12	0.11		4	3.05	0.17
[3980]	CONVERGENT MARGIN	HONSHU ARC / SOUTHWESTERN HONSHU ARC / SHIKOKU/SIKOKU	UWAJIMA, SHIMANO BELT	33.22	33.22	132.53	132.53	SAE			s_1304A [3980]	GRANODIORITE, BIOTITE-CORDIERITE [3980]			MIDDLE [3980]	MIOCENE [3980]					PLU					WR [3980]	66.8	0.75		15.29				4.16	2.8	1.73	0.09		3.86	2.9	0.17
[3980]	CONVERGENT MARGIN	HONSHU ARC / SOUTHWESTERN HONSHU ARC / SHIKOKU/SIKOKU	UWAJIMA, SHIMANO BELT	33.22	33.22	132.53	132.53	SAE			s_0202 [3980]	GRANODIORITE, BIOTITE [3980]			MIDDLE [3980]	MIOCENE [3980]					PLU					WR [3980]	67.94	0.67		14.87				3.18	2.69	1.54	0.06		4.34	3.05	0.16
[3980]	CONVERGENT MARGIN	HONSHU ARC / SOUTHWESTERN HONSHU ARC / SHIKOKU/SIKOKU	UWAJIMA, SHIMANO BELT	33.22	33.22	132.53	132.53	SAE			s_0613D [3980]	GRANODIORITE, BIOTITE [3980]			MIDDLE [3980]	MIOCENE [3980]					PLU					WR [3980]	66.93	0.78		15.47				3.88	3.08	1.84	0.07		4	3.21	0.18
[truncated: 19,752 more rows]
[truncated: 121 more columns]

## Sheet: Raw Mg# RI
CITATIONS	TECTONIC SETTING	LOCATION	LOCATION COMMENT	LATITUDE MIN	LATITUDE MAX	LONGITUDE MIN	LONGITUDE MAX	LAND OR SEA	ELEVATION MIN	ELEVATION MAX	SAMPLE NAME	ROCK NAME	MIN. AGE (YRS.)	MAX. AGE (YRS.)	GEOL.	AGE	ERUPTION DAY	ERUPTION MONTH	ERUPTION YEAR	ROCK TEXTURE	ROCK TYPE	DRILL DEPTH MIN	DRILL DEPTHAX	ALTERATION	MINERAL	MATERIAL	SIO2(WT%)	TIO2(WT%)	B2O3(WT%)	AL2O3(WT%)	CR2O3(WT%)	FE2O3(WT%)	FEO(WT%)	FEOT(WT%)	CAO(WT%)	MGO(WT%)	MNO(WT%)	NIO(WT%)	K2O(WT%)	NA2O(WT%)	P2O5(WT%)	Mg#	RI	H2O(WT%)	H2OP(WT%)	H2OM(WT%)	H2OT(WT%)	CO2(WT%)	CO1(WT%)
[truncated: 1,600 more rows]
[truncated: 123 more columns]

[truncated: 1 more sheets: Final]
